# Supplementary material for: Environmental change drives accelerated adaptation through stimulated copy number variation
Source: PLoS Biol. 2017 Jun 27;15(6):e2001333. doi: 10.1371/journal.pbio.2001333 (PMC5486974; doi:10.1371/journal.pbio.2001333)
Supplement: S1 Data — (XLSX) [file pbio.2001333.s013.xlsx]

## Sheet: Description
	This workbook contains the raw data used to produce cumulative frequency plots of gene expression (Fig. 2a, S1a, S1b, S2a)
	Read data (including accessions GSE61783 [97], GSE74642, GSE70835, GSE54831 [98], GSE54825 [99], GSE43002 [100], GSE41834 [101] deposited at GEO)
		was mapped to genome R64-2-1 using HISAT2 v2.0.5 (--sp 1000,1000).
	Log2 read counts were performed for each annotated CDS using Seqmonk v0.34.1 and normalised for CDS length, then the whole dataset was normalised for a median expression of 9
	Genes were categorised as γ-H2A or non-γH2A using the R script in Supplementary File 1.
	Data is split into the sets used for each idividual figure, note that the control samples for S1a and S1b are also shown as YPD datasets in 2a

## Sheet: non-yH2A genes
		Figure 2a									Figure S1b (lower)			Figure S1a			Figure S1b (upper)			Figure S2a
id		ypd	ypgly	t.0	untreated	glucose	pre	Typical.12hr	Flocculate.12hr		untreated	salt		ypd	ypgly		pre	Peroxide		-Cu	+cu
YAL065C		5.81899	7.16904	4.39927	5.35699	6.22103	6.27131	7.87489	7.91292		5.35699	5.70397		5.81899	7.16904		6.27131	7.07395		6.57913	5.0922
YAL064W-B		6.21001	6.62284	5.50678	3.45354	6.21062	6.49526	6.95258	6.81998		3.45354	5.67498		6.21001	6.62284		6.49526	6.44114		6.68913	4.52978
YAL064C-A		4.97305	7.15803	4.84581	2.71657	6.79386	7.04576	7.46354	4.23502		2.71657	4.98108		4.97305	7.15803		7.04576	6.83626		7.0611	7.17364
YAL063C		6.57583	7.89802	5.78883	5.93805	6.43596	7.08971	7.81579	7.16699		5.93805	6.43752		6.57583	7.89802		7.08971	7.35236		5.12765	6.21496
YAL062W		8.37964	11.7825	6.59894	7.22653	10.4756	8.5043	10.1166	9.13939		7.22653	8.76335		8.37964	11.7825		8.5043	8.74392		8.11748	7.78779
YAL061W		9.12356	12.1259	5.90784	6.61751	9.24409	8.62826	12.0557	11.0236		6.61751	10.8229		9.12356	12.1259		8.62826	9.05247		8.59724	8.89857
YAL060W		11.2771	12.5745	10.4038	11.3726	10.3827	11.1235	13.3021	13.7094		11.3726	13.8326		11.2771	12.5745		11.1235	12.7693		10.4015	10.6203
YAL059W		10.3552	8.91762	12.1185	10.4334	9.14158	11.1504	7.65281	7.9566		10.4334	7.11914		10.3552	8.91762		11.1504	7.21812		9.93246	9.80612
YAL059C-A		10.299	8.86396	6.75959	10.1241	8.92563	10.9872	7.06475	7.65401		10.1241	6.74275		10.299	8.86396		10.9872	7.0011		9.60055	9.32143
YAL058W		8.71578	8.87578	8.83532	8.72708	8.33958	9.53102	8.40314	8.45874		8.72708	8.6092		8.71578	8.87578		9.53102	9.09428		8.21585	8.53841
YAL056C-A		8.62081	8.99505	4.96413	8.79296	8.08671	9.19151	8.60695	8.2722		8.79296	8.71584		8.62081	8.99505		9.19151	8.7944		8.21184	8.75663
YAL056W		8.98557	9.00228	8.9481	7.35966	9.25211	8.70654	9.25208	9.70104		7.35966	8.76198		8.98557	9.00228		8.70654	9.12534		8.85175	8.81762
YAL055W		7.23405	7.5841	9.09381	6.72897	9.13678	7.42452	7.70445	9.34224		6.72897	7.77906		7.23405	7.5841		7.42452	8.06867		8.66037	9.24744
YAL054C		8.01813	15.5268	6.75084	7.30762	7.55255	7.53902	13.3147	12.2735		7.30762	7.37119		8.01813	15.5268		7.53902	8.30663		6.60243	6.56225
YAL053W		10.4842	11.2728	9.44502	11.4959	9.39876	10.6844	11.3467	9.9671		11.4959	10.2009		10.4842	11.2728		10.6844	10.4564		9.25873	9.18684
YAL051W		7.85496	8.21102	7.61164	8.34426	7.71368	7.79352	9.21071	9.46989		8.34426	8.62532		7.85496	8.21102		7.79352	8.31282		8.11152	7.92384
YAL049C		10.0749	11.6006	10.4756	11.497	8.68828	10.1479	12.2597	12.3783		11.497	12.1514		10.0749	11.6006		10.1479	10.989		10.1616	10.2283
YAL047W-A		6.41734	6.57287	5.34562	6.79837	6.83939	6.24612	7.48183	7.14278		6.79837	7.39557		6.41734	6.57287		6.24612	7.1591		6.89646	5.90703
YAL048C		6.8513	7.91853	7.41382	8.13975	7.80844	7.91267	8.28264	8.16825		8.13975	8.3336		6.8513	7.91853		7.91267	8.63427		7.63534	7.55499
YAL047C		6.30629	6.55404	7.7564	6.96906	7.53242	6.99165	6.71129	7.24895		6.96906	6.8208		6.30629	6.55404		6.99165	6.42816		7.57405	7.5115
YAL046C		10.1944	10.6686	10.8735	9.751	9.81255	10.2684	9.09956	9.00131		9.751	10.768		10.1944	10.6686		10.2684	9.8551		9.63805	9.80356
YAL044W-A		10.175	11.093	10.9817	9.71174	10.5907	10.4648	10.3757	10.5892		9.71174	9.79697		10.175	11.093		10.4648	10.7667		9.90447	10.2632
YAL045C		10.1194	11.0731	5.148	9.67697	10.4828	10.3656	10.2904	10.5087		9.67697	9.74655		10.1194	11.0731		10.3656	10.6446		9.51857	9.79775
YAL044C		12.9492	12.1871	12.0311	11.4809	13.4655	12.1768	10.57	10.5456		11.4809	12.6366		12.9492	12.1871		12.1768	10.8085		11.7058	11.6912
YAL043C		9.51598	8.99268	9.57385	9.00175	8.82418	9.22046	9.12378	8.54783		9.00175	9.95501		9.51598	8.99268		9.22046	9.268		9.01637	8.98489
YAL042W		12.6105	11.8912	11.9951	11.4123	11.1377	12.3105	10.6604	10.3585		11.4123	11.5292		12.6105	11.8912		12.3105	11.8566		11.5641	11.5969
YAL042C-A		12.5847	12.0467	6.28344	10.9285	10.7868	11.8691	10.3321	10.1683		10.9285	11.0567		12.5847	12.0467		11.8691	11.3518		10.7526	10.7555
YAL041W		8.724	8.54616	8.70779	9.07878	8.8437	8.99252	8.7576	8.14926		9.07878	9.74429		8.724	8.54616		8.99252	9.16746		9.20813	8.96108
YAL040C		10.4965	9.848	9.73631	9.87674	8.38631	10.0239	10.1589	9.46127		9.87674	9.73333		10.4965	9.848		10.0239	7.84157		9.47943	9.3445
YAL039C		9.87751	10.9688	10.7163	8.88426	10.1033	8.83753	11.4517	10.0598		8.88426	9.51026		9.87751	10.9688		8.83753	9.48148		9.38391	9.43034
YAL038W		17.2273	15.4338	16.7581	16.2234	15.3166	17.2435	16.9565	17.7706		16.2234	15.4599		17.2273	15.4338		17.2435	16.8005		16.3171	16.2044
YAL037C-B		17.3758	15.5429	8.65398	16.3966	15.3516	17.3811	17.0547	17.8608		16.3966	15.6231		17.3758	15.5429		17.3811	16.9322		16.3702	16.272
YAL037C-A		11.1571	9.24229	6.3043	8.62553	7.82757	10.3939	7.91307	9.24679		8.62553	8.41996		11.1571	9.24229		10.3939	10.0505		13.2174	13.115
YAL037W		6.60504	7.38447	5.92937	8.35799	8.23223	7.32359	7.6928	8.47954		8.35799	8.25709		6.60504	7.38447		7.32359	6.50355		6.65355	7.09623
YAL036C		10.6291	9.47978	11.9534	10.2785	9.43561	11.4252	8.94282	7.12695		10.2785	8.11414		10.6291	9.47978		11.4252	7.47234		10.9748	10.8388
YAL035W		11.1913	9.10914	12.5577	10.6566	9.98975	11.4103	9.97622	9.59178		10.6566	9.65766		11.1913	9.10914		11.4103	9.64763		11.9587	11.9304
YAL034W-A		6.55398	6.16133	9.08771	7.69861	7.90972	7.13585	6.62925	6.70201		7.69861	7.13285		6.55398	6.16133		7.13585	7.17648		8.11089	8.13297
YAL034C-B		8.44002	6.38984	4.45185	7.63853	7.20242	7.54434	6.19612	6.14842		7.63853	6.84515		8.44002	6.38984		7.54434	6.59734		8.837	8.92123
YAL034C		8.56675	10.5212	8.0681	8.67592	8.95249	8.5219	11.929	11.9012		8.67592	9.69115		8.56675	10.5212		8.5219	9.17439		8.2188	8.12876
YAL033W		9.37877	8.48978	10.3834	9.39503	8.66709	9.78095	6.17639	7.27261		9.39503	8.46173		9.37877	8.48978		9.78095	8.3156		9.1132	9.20481
YAL032C		7.94679	8.69012	8.95264	7.49002	8.86222	7.90803	8.72544	8.42864		7.49002	8.10849		7.94679	8.69012		7.90803	8.10027		8.47993	8.36646
YAL031W-A		9.00084	8.1415	4.648	8.12728	8.63141	7.99898	9.41665	9.35738		8.12728	9.17594		9.00084	8.1415		7.99898	8.81397		8.6043	8.91943
YAL031C		8.11702	8.13146	7.76051	7.79765	8.68159	7.78306	9.33645	9.13072		7.79765	8.70018		8.11702	8.13146		7.78306	8.78163		8.11664	8.31304
YAL030W		10.1889	11.1675	10.6437	9.85479	10.9655	9.91836	11.1395	11.5889		9.85479	10.696		10.1889	11.1675		9.91836	11.3346		10.0762	10.396
YAL029C		8.82367	7.66156	9.12453	9.08306	7.72107	9.64713	8.21989	8.06209		9.08306	8.74999		8.82367	7.66156		9.64713	8.60621		9.18703	9.1229
YAL028W		7.19954	7.9246	5.79856	7.58492	8.12296	6.48279	9.365	9.71283		7.58492	9.41072		7.19954	7.9246		6.48279	8.103		7.00266	7.2787
YAL027W		7.39499	8.1079	8.56024	7.78036	8.02792	7.82207	7.86204	8.78647		7.78036	8.41874		7.39499	8.1079		7.82207	8.73953		8.18629	8.45083
YAL026C-A		9.2938	8.09162	8.57089	8.54885	8.30598	9.0767	8.05887	8.45173		8.54885	8.88724		9.2938	8.09162		9.0767	8.32878		9.24602	9.59543
YAL026C		8.70428	7.78682	8.68831	8.34587	8.15414	9.20428	8.40525	8.1573		8.34587	8.54426		8.70428	7.78682		9.20428	8.22571		8.96165	8.94146
YAL025C		10.5513	7.88943	12.774	10.2234	9.87861	10.9843	7.48652	5.68953		10.2234	6.53907		10.5513	7.88943		10.9843	6.17591		11.1047	10.9877
YAL024C		6.76916	6.01567	7.0432	6.91554	6.10615	7.36892	5.34095	5.25943		6.91554	7.15186		6.76916	6.01567		7.36892	6.00873		7.46884	7.46942
YAL023C		12.3767	10.8514	11.4208	12.4414	10.3389	12.5578	11.3615	11.5023		12.4414	11.6536		12.3767	10.8514		12.5578	11.3805		11.6092	11.4633
YAL022C		10.8081	10.2439	9.5693	9.38194	9.15584	10.5481	9.09838	8.4309		9.38194	9.51655		10.8081	10.2439		10.5481	9.91478		9.47743	9.30256
YAL021C		10.1311	9.71221	10.0823	10.1023	8.98773	9.82528	9.89437	9.1994		10.1023	9.8851		10.1311	9.71221		9.82528	9.39962		8.52341	8.36225
YAL019W-A		9.53957	9.79892	5.69086	9.13915	8.64553	8.68625	7.63444	8.20844		9.13915	9.34036		9.53957	9.79892		8.68625	9.10167		7.90314	7.83125
YAL020C		9.78654	9.89072	9.92232	9.50973	8.93559	9.1784	8.67026	8.67289		9.50973	9.73162		9.78654	9.89072		9.1784	9.54391		8.51953	8.65832
YAL019W		7.77923	7.13545	9.73922	8.42478	8.02404	8.6991	7.6645	8.19539		8.42478	7.47911		7.77923	7.13545		8.6991	5.85471		9.08051	8.99219
YAL016C-B		7.97422	9.35348	5.3043	8.19952	7.20007	6.91994	9.2501	9.8164		8.19952	9.30315		7.97422	9.35348		6.91994	8.70281		8.44351	8.65173
YAL016W		10.8529	10.7925	10.2054	10.5242	10.0625	10.5184	11.0224	11.4019		10.5242	10.9546		10.8529	10.7925		10.5184	11.5656		10.5732	10.5915
YAL016C-A		10.4933	10.5088	6.02393	9.7459	9.72	9.3831	10.806	11.3875		9.7459	10.3392		10.4933	10.5088		9.3831	10.5773		9.30237	9.67459
YAL015C		7.99002	8.1387	9.09306	7.78932	8.97228	8.46546	8.1303	7.79902		7.78932	8.30184		7.99002	8.1387		8.46546	10.1104		8.38944	8.24093
YAL014C		10.6995	10.0917	10.5633	10.4394	10.1328	9.83591	10.2304	10.2763		10.4394	10.6763		10.6995	10.0917		9.83591	10.2938		9.33182	9.57916
YAL013W		9.48868	8.89624	9.98609	8.83974	9.80867	8.33261	9.07034	9.77147		8.83974	9.06794		9.48868	8.89624		8.33261	8.87083		8.87922	9.09154
YAL012W		13.6182	10.8047	13.4057	13.3427	12.9047	13.7757	11.2761	11.5258		13.3427	12.3278		13.6182	10.8047		13.7757	13.613		12.8304	12.7069
YAL011W		7.0402	7.3437	8.32504	7.0324	7.98065	7.48875	7.54848	8.2443		7.0324	7.48407		7.0402	7.3437		7.48875	7.38894		8.63573	8.52307
YAL010C		7.70618	7.79019	8.01049	8.26864	8.32284	7.7892	7.41916	6.97578		8.26864	8.4447		7.70618	7.79019		7.7892	8.28546		7.96392	8.09366
YAL009W		9.32593	9.34542	9.04627	8.95279	9.2176	9.29731	8.37833	8.41079		8.95279	9.21859		9.32593	9.34542		9.29731	9.74004		8.85339	8.85365
YAL008W		9.58427	11.7184	9.53074	8.57378	10.571	9.02719	10.4905	10.9697		8.57378	9.57548		9.58427	11.7184		9.02719	10.8563		9.71528	10.1107
YAL007C		12.0051	10.8679	11.9171	11.5512	10.4539	11.8255	8.99373	9.18992		11.5512	11.2369		12.0051	10.8679		11.8255	11.6647		11.529	11.579
YAL004W		13.0253	14.4329	6.74057	14.1884	12.4029	13.7529	16.107	15.5648		14.1884	14.8477		13.0253	14.4329		13.7529	14.7236		14.6845	14.5476
YAL005C		13.359	14.6966	13.1867	14.6732	12.5799	14.2414	16.3129	15.7554		14.6732	15.3651		13.359	14.6966		14.2414	15.1832		14.9941	14.9078
YAL003W		15.1094	13.5229	16.0902	14.3521	12.6653	14.8406	12.6286	12.8032		14.3521	12.8328		15.1094	13.5229		14.8406	12.3828		14.8355	14.7304
YAL002W		7.69982	8.48668	7.21431	8.57385	7.9269	7.97227	8.71456	8.74189		8.57385	9.1915		7.69982	8.48668		7.97227	8.58813		7.86653	7.83881
YAL001C		7.63034	7.68726	7.8757	7.61658	8.40151	7.72302	7.58377	8.20542		7.61658	8.27491		7.63034	7.68726		7.72302	8.97587		8.4991	8.52933
YAR002W		10.0201	8.86559	10.3255	9.6392	9.14887	10.0594	8.22902	8.78351		9.6392	9.7022		10.0201	8.86559		10.0594	9.47522		10.0508	9.86791
YAR002C-A		13.1561	12.8182	12.1878	12.8236	11.3856	13.157	10.3338	10.6796		12.8236	11.9464		13.1561	12.8182		13.157	12.6546		11.7442	11.8574
YAR003W		9.85034	9.09511	9.33478	9.69281	9.01767	9.75358	8.51787	8.41635		9.69281	9.9157		9.85034	9.09511		9.75358	10.4002		8.96601	9.1467
YAR007C		9.27182	9.25181	9.97434	9.30611	8.73882	9.51149	9.03379	8.68945		9.30611	9.61521		9.27182	9.25181		9.51149	10.973		9.77923	10.0354
YAR008W		8.7803	7.97425	9.86403	8.2668	8.68795	9.06232	6.79621	6.89654		8.2668	7.47768		8.7803	7.97425		9.06232	8.11027		8.87415	9.13104
YAR014C		9.59733	8.47884	9.98764	9.27296	9.30175	9.82272	8.31508	8.91945		9.27296	9.56798		9.59733	8.47884		9.82272	8.94718		9.56162	9.6816
YAR015W		14.0982	10.7347	10.8417	13.4123	11.8933	12.4526	9.74741	9.46345		13.4123	12.8153		14.0982	10.7347		12.4526	10.9451		11.8981	11.6993
YAR018C		9.26924	7.97626	9.01326	8.15463	8.34069	8.56401	6.27742	7.04798		8.15463	7.74712		9.26924	7.97626		8.56401	6.7981		8.61659	8.41562
YAR019W-A		5.90428	6.72078	4.54008	6.28007	6.05342	5.7189	7.65781	7.40657		6.28007	6.39167		5.90428	6.72078		5.7189	6.25038		4.79594	4.30901
YAR019C		7.0498	7.89717	6.74449	7.73696	7.08154	7.12758	8.9201	8.51845		7.73696	8.07264		7.0498	7.89717		7.12758	7.64016		7.09573	7.04042
YAR020C		8.10782	8.09665	6.10314	8.33531	9.43645	7.42503	11.0741	10.422		8.33531	9.08057		8.10782	8.09665		7.42503	8.07992		7.68989	7.79857
YAR023C		7.43983	8.51688	5.50361	8.93905	8.41567	7.64165	9.57043	9.80867		8.93905	8.91009		7.43983	8.51688		7.64165	9.24119		7.1429	7.69904
YAR027W		10.519	11.3602	10.1172	11.5009	10.1561	10.096	10.1858	10.953		11.5009	10.7566		10.519	11.3602		10.096	11.8721		9.94612	10.3603
YAR028W		10.0015	8.39597	8.9528	10.4453	9.88112	9.43147	9.39028	10.3916		10.4453	8.84971		10.0015	8.39597		9.43147	9.61572		9.01762	9.23441
YAR029W		8.3201	7.96766	7.08536	9.54969	9.46908	8.44562	9.3563	10.2285		9.54969	8.56638		8.3201	7.96766		8.44562	7.45104		8.16889	8.4991
YAR031W		8.42814	9.17774	8.30091	8.67437	8.41266	8.80634	7.54508	8.0441		8.67437	9.16907		8.42814	9.17774		8.80634	9.80897		8.88205	8.37128
YAR030C		7.45077	7.92133	4.57761	8.56818	8.55892	7.84383	8.4158	9.10506		8.56818	7.81097		7.45077	7.92133		7.84383	7.08584		7.45791	8.11184
YAR033W		9.06308	9.42847	8.8021	9.15517	8.57977	8.88196	7.93264	7.62331		9.15517	9.1707		9.06308	9.42847		8.88196	9.17837		8.70252	8.06822
YAR035W		6.94768	12.3242	6.15638	5.9748	10.4899	6.41515	7.4692	7.3899		5.9748	5.50044		6.94768	12.3242		6.41515	5.85149		6.14137	6.30166
YAR035C-A		7.07533	10.4109	6.50361	4.36541	8.1186	4.79997	5.44941	3.46882		4.36541	4.71238		7.07533	10.4109		4.79997	4.56327		5.83547	6.34854
YAR042W		8.37278	8.62118	8.78914	8.32735	7.98305	8.61365	9.20793	8.85131		8.32735	8.48296		8.37278	8.62118		8.61365	8.67794		8.87865	8.75208
YAR047C		6.29627	7.37901	4.51703	0.226824	5.60656	5.76967	1.72586	1.33024		0.226824	-0.01116		6.29627	7.37901		5.76967	5.28835		5.43385	5.58436
YAR050W		6.24525	6.93541	2.40862	5.7979	5.93572	6.79918	6.79072	6.36138		5.7979	6.31506		6.24525	6.93541		6.79918	6.70454		6.20319	5.50148
YAR053W		6.36182	7.48216	4.62914	3.95037	8.02566	6.44958	4.57494	5.98667		3.95037	3.25295		6.36182	7.48216		6.44958	5.81574		4.54596	5.88911
YAR060C		6.60782	6.88913	4.52714	5.80479	5.75719	6.46538	3.81198	1.41635		5.80479	5.07495		6.60782	6.88913		6.46538	6.402		3.783	4.29608
YAR064W		5.97884	6.26014	4.61464	8.35295	5.5008	5.9643	3.56044	5.57985		8.35295	7.83836		5.97884	6.26014		5.9643	6.13757		7.19443	7.19654
YAR066W		7.71553	8.20401	7.2818	11.214	6.03467	9.11163	4.75427	5.25172		11.214	11.2864		7.71553	8.20401		9.11163	8.15404		6.00539	6.75293
YAR068W		8.11433	8.32593	7.90686	13.1334	6.90274	9.89322	10.9197	10.3143		13.1334	12.3104		8.11433	8.32593		9.89322	8.78398		6.05786	5.98597
YJL223C		4.54287	3.95569	7.22135	7.43984	8.44093	5.40771	8.66626	8.00528		7.43984	5.87033		4.54287	3.95569		5.40771	4.8894		5.67149	3.5996
YJL222W-B		7.80665	6.71948	5.73493	8.07247	8.98638	8.59559	8.52204	8.60703		8.07247	7.11363		7.80665	6.71948		8.59559	7.46251		6.38872	5.99491
YJL222W-A		5.78981	5.20263	5.01057	6.82656	7.52931	6.52753	7.17876	7.1457		6.82656	6.0267		5.78981	5.20263		6.52753	6.41816		5.34243	3.11854
YJL222W		6.8635	6.22028	7.1631	3.42913	7.07965	7.47357	7.67233	7.15508		3.42913	3.99161		6.8635	6.22028		7.47357	7.44238		6.93482	6.92604
YJL217W		10.5424	13.8253	11.2625	-0.66833	11.3646	11.0854	1.98271	0.435077		-0.66833	-0.90632		10.5424	13.8253		11.0854	11.3625		10.6048	9.57533
YJL216C		6.7303	6.27686	6.36832	7.29077	6.08807	6.71123	6.77431	6.49826		7.29077	7.28989		6.7303	6.27686		6.71123	6.41495		6.1334	6.06151
YJL215C		6.21581	6.27338	7.29609	7.12029	6.20586	6.43272	6.75684	4.63874		7.12029	7.41004		6.21581	6.27338		6.43272	6.48122		7.07578	6.31202
YJL214W		5.02562	6.62306	5.13312	6.56167	6.25931	6.23054	8.11197	7.94233		6.56167	6.40344		5.02562	6.62306		6.23054	6.39227		6.26843	6.29439
YJL213W		7.11614	7.11392	8.26106	9.8214	10.4201	8.61987	7.93778	7.21499		9.8214	11.0071		7.11614	7.11392		8.61987	9.52421		7.32384	7.35288
YJL212C		10.3195	7.16896	9.44196	8.93228	8.60205	10.206	8.45929	8.26985		8.93228	7.6762		10.3195	7.16896		10.206	8.80899		9.68121	9.58024
YJL210W		10.6189	10.9069	9.3218	9.83454	10.5969	9.71001	10.8033	11.0868		9.83454	10.2336		10.6189	10.9069		9.71001	10.5277		9.48017	9.63068
YJL211C		10.384	10.957	5.41752	9.64893	10.3378	9.2248	10.4787	10.9256		9.64893	10.0769		10.384	10.957		9.2248	9.85403		8.55083	8.64886
YJL209W		7.18238	7.05983	8.19175	7.78036	8.20609	7.89043	8.28635	8.55135		7.78036	7.90091		7.18238	7.05983		7.89043	7.76303		8.43468	8.2184
YJL208C		9.34029	9.25291	10.7799	9.21954	8.60358	9.4926	7.5104	6.36518		9.21954	7.95061		9.34029	9.25291		9.4926	6.55671		9.69164	9.69904
YJL207C		7.97019	6.80416	8.2917	8.06147	6.53071	8.37057	6.95792	6.90714		8.06147	7.70583		7.97019	6.80416		8.37057	7.08277		8.11563	8.2783
YJL206C		7.12423	8.02955	6.87491	7.30722	7.32934	7.14586	8.23873	7.99337		7.30722	6.71095		7.12423	8.02955		7.14586	7.64364		6.56156	6.80849
YJL205C		8.89086	10.9044	10.1376	9.32604	10.0101	9.09535	10.0177	10.6904		9.32604	9.06635		8.89086	10.9044		9.09535	9.74391		8.28021	8.63212
YJL204C		7.48274	7.23	7.51601	7.67696	7.27397	7.62435	6.32123	6.47353		7.67696	7.59889		7.48274	7.23		7.62435	7.21889		8.04932	8.01682
YJL203W		6.90048	6.90109	9.20195	7.80285	8.78835	7.96673	6.97676	7.2592		7.80285	7.82202		6.90048	6.90109		7.96673	8.14828		8.70386	8.48207
YJL202C		7.29416	6.9145	5.269	8.0371	8.9116	8.05519	7.04676	7.53565		8.0371	7.92519		7.29416	6.9145		8.05519	8.37258		9.01778	9.08675
YJL201W		8.79181	7.95986	8.6271	8.62618	8.65005	9.04248	7.6943	8.02279		8.62618	9.17754		8.79181	7.95986		9.04248	9.32501		8.67895	8.62504
YJL200C		9.65764	8.81201	10.824	10.8794	9.5046	10.2514	7.68711	6.45598		10.8794	8.29689		9.65764	8.81201		10.2514	6.62698		9.44443	9.13116
YJL199C		7.56203	10.133	8.01976	7.32939	10.1792	7.46577	10.191	10.2821		7.32939	8.65715		7.56203	10.133		7.46577	9.76083		7.52261	6.33524
YJL198W		10.6161	9.06313	9.98225	9.96888	8.3762	10.898	9.73103	7.34896		9.96888	8.57695		10.6161	9.06313		10.898	7.63522		9.16986	8.89874
YJL197W		8.19733	7.60771	8.59811	8.78972	7.35451	8.75159	8.64779	8.40495		8.78972	8.43118		8.19733	7.60771		8.75159	8.39657		8.59151	8.55367
YJL197C-A		8.29782	7.34941	4.70391	8.94941	7.23949	8.61273	8.43979	8.28383		8.94941	8.1479		8.29782	7.34941		8.61273	8.4457		8.32117	8.24928
YJL196C		12.3859	12.0644	10.3231	11.5655	10.5358	12.0163	10.501	10.8949		11.5655	12.7744		12.3859	12.0644		12.0163	12.5775		11.6846	11.7807
YJL194W		8.08768	7.20573	8.07033	7.66349	7.85124	7.94688	6.74299	6.57563		7.66349	7.02897		8.08768	7.20573		7.94688	6.47987		7.84212	7.87917
YJL195C		8.02449	6.53364	4.25661	7.25555	7.63549	7.66897	6.58186	6.46186		7.25555	6.36949		8.02449	6.53364		7.66897	6.07346		7.24355	7.48099
YJL193W		9.5367	8.12792	8.53698	9.36652	8.55661	9.38337	7.13462	7.51158		9.36652	9.0318		9.5367	8.12792		9.38337	8.09679		8.62222	8.38739
YJL192C		11.6555	11.0394	11.1626	10.6903	10.5702	11.8436	10.3849	11.5456		10.6903	10.863		11.6555	11.0394		11.8436	11.5265		11.0845	11.1096
YJL191W		12.9213	11.8452	13.2477	12.161	10.9389	13.1917	10.0859	10.3977		12.161	10.1322		12.9213	11.8452		13.1917	10.7805		12.0645	12.0973
YJL190C		16.5095	13.6137	16.8574	15.2963	13.4363	16.4455	9.59714	7.83414		15.2963	13.4053		16.5095	13.6137		16.4455	12.3635		15.3438	15.3092
YJL189W		14.4907	12.9124	16.054	14.5932	13.7986	14.9711	9.5526	10.6513		14.5932	13.305		14.4907	12.9124		14.9711	13.1914		13.3172	13.3285
YJL188C		15.057	13.4425	8.45535	15.3581	14.3749	15.7501	10.4167	11.4826		15.3581	14.0622		15.057	13.4425		15.7501	13.9859		14.7804	14.8839
YJL187C		8.20369	7.91464	8.71849	8.32193	7.95546	8.91745	7.8377	8.12354		8.32193	8.94134		8.20369	7.91464		8.91745	8.15348		8.69224	8.76676
YJL186W		10.4441	10.5068	9.98226	10.2585	8.5336	10.835	8.73727	8.38843		10.2585	10.959		10.4441	10.5068		10.835	8.98091		10.3618	10.3941
YJL185C		8.00296	11.2822	7.4862	7.57526	8.71366	8.14842	10.5451	10.3772		7.57526	9.59477		8.00296	11.2822		8.14842	8.72195		7.51997	7.64072
YJL184W		9.53095	10.1184	10.8745	9.62143	10.7447	10.2556	9.95054	10.6937		9.62143	9.22732		9.53095	10.1184		10.2556	10.2477		10.144	10.179
YJL183W		11.0054	9.62538	10.4743	10.3919	9.38981	11.2223	9.29143	9.08603		10.3919	9.89208		11.0054	9.62538		11.2223	10.0628		10.4842	10.4681
YJL181W		7.24052	6.74612	7.32303	5.68945	7.81751	6.99909	7.64272	7.49379		5.68945	6.31142		7.24052	6.74612		6.99909	6.78492		7.77591	7.95457
YJL182C		4.80981	6.01512	4.53057	4.47984	5.98445	4.60689	6.93581	7.13964		4.47984	4.40231		4.80981	6.01512		4.60689	3.50256		2.86244	3.79055
YJL180C		8.37924	8.8194	9.45572	7.95644	8.46166	8.16038	7.85557	7.59608		7.95644	8.69723		8.37924	8.8194		8.16038	8.74866		9.30772	9.38406
YJL179W		9.47785	9.15137	11.4397	9.82073	9.98027	10.4333	6.29741	7.39654		9.82073	8.98664		9.47785	9.15137		10.4333	8.95552		10.4456	10.3592
YJL178C		11.4561	10.6269	11.278	10.8434	10.21	11.4153	10.643	11.0655		10.8434	10.9772		11.4561	10.6269		11.4153	10.7938		10.8823	10.7574
YJL177W		14.2767	12.0604	14.8337	13.6986	12.3669	14.1508	9.31569	10.0821		13.6986	12.102		14.2767	12.0604		14.1508	11.0536		13.7262	13.7415
YJL175W		7.85977	7.7004	5.07761	7.87237	8.25113	8.47046	7.74064	7.66383		7.87237	8.22268		7.85977	7.7004		8.47046	8.48223		8.56482	8.84208
YJL176C		8.39064	8.15929	9.31096	8.47742	8.19463	8.66393	7.80278	7.73583		8.47742	8.68065		8.39064	8.15929		8.66393	8.65323		9.16245	9.22293
YJL174W		12.2733	11.7615	11.8801	11.7656	11.2875	11.9898	12.758	12.7423		11.7656	12.1718		12.2733	11.7615		11.9898	12.1259		11.4653	11.4061
YJL173C		10.8316	10.9846	11.7855	10.8324	10.6351	11.17	8.99875	8.69904		10.8324	10.6402		10.8316	10.9846		11.17	11.2386		10.8377	10.7409
YJL172W		9.81943	10.6685	9.71739	9.96014	8.45712	10.358	11.422	10.2589		9.96014	9.93779		9.81943	10.6685		10.358	10.8149		9.98398	9.90063
YJL171C		10.753	9.75563	10.5501	13.6405	9.76682	10.6718	13.1621	12.9756		13.6405	11.8175		10.753	9.75563		10.6718	12.2716		9.31051	9.47793
YJL170C		7.96619	8.6432	7.33895	7.55071	7.00976	7.63381	7.81198	7.59692		7.55071	8.11643		7.96619	8.6432		7.63381	8.36913		9.18899	9.72903
YJL169W		8.88958	7.2042	5.55295	8.29152	7.99754	8.99885	7.34925	6.41047		8.29152	8.91993		8.88958	7.2042		8.99885	7.72431		9.79759	9.79512
YJL168C		8.73005	7.03808	9.77182	8.29327	8.08678	8.92402	7.07124	6.72088		8.29327	8.51495		8.73005	7.03808		8.92402	7.62483		9.43047	9.28654
YJL167W		12.1508	12.0339	13.2227	12.942	11.3495	12.0893	11.7185	11.4361		12.942	12.6266		12.1508	12.0339		12.0893	11.7121		12.434	12.5805
YJL166W		12.019	13.9091	12.0757	12.9312	10.832	10.8862	14.1122	15.2074		12.9312	12.8135		12.019	13.9091		10.8862	11.4123		11.3151	11.8159
YJL165C		8.29706	8.03551	9.04871	10.8264	8.70571	8.52981	9.74051	10.5611		10.8264	9.52832		8.29706	8.03551		8.52981	9.29379		8.81179	9.00822
YJL164C		7.4728	10.1161	7.69662	8.20306	8.66297	7.48242	10.7434	11.5864		8.20306	9.91545		7.4728	10.1161		7.48242	11.3945		8.42134	8.77666
YJL163C		7.65868	10.9947	5.64868	7.6234	8.47153	6.92832	10.2818	9.97282		7.6234	9.11154		7.65868	10.9947		6.92832	9.46762		7.17185	7.45481
YJL162C		6.72868	6.04185	8.29555	7.56165	7.88889	7.6458	6.4739	6.44327		7.56165	6.89705		6.72868	6.04185		7.6458	6.0476		7.75808	8.12306
YJL161W		5.19885	10.7856	5.99561	7.25707	9.10658	6.35994	11.3721	11.662		7.25707	8.53981		5.19885	10.7856		6.35994	9.9544		6.73437	7.66248
YJL160C		7.02877	7.24006	5.43673	5.37663	8.27784	5.76108	6.17733	5.41133		5.37663	5.59502		7.02877	7.24006		5.76108	6.14214		4.87986	4.80797
YJL159W		15.4111	15.3838	14.4106	15.4703	14.6226	14.746	16.4989	16.3933		15.4703	14.5433		15.4111	15.3838		14.746	14.263		13.8731	13.6677
YJL158C		15.2966	14.4915	14.3082	14.5932	12.1806	14.7774	14.0468	14.0113		14.5932	13.3658		15.2966	14.4915		14.7774	14.3953		13.7819	13.656
YJL157C		10.0551	7.94707	10.0254	9.0363	9.6974	10.0135	8.71342	8.34518		9.0363	8.68046		10.0551	7.94707		10.0135	8.90972		10.0999	10.163
YJL156W-A		9.54664	8.2633	5.12504	8.99299	8.86264	8.92861	9.03924	8.47368		8.99299	9.33819		9.54664	8.2633		8.92861	8.72854		9.23888	9.1419
YJL156C		8.81354	8.62708	8.65262	8.4996	8.88701	8.67602	8.59229	8.2783		8.4996	8.79194		8.81354	8.62708		8.67602	8.55933		8.36796	8.60642
YJL155C		7.74674	9.51022	7.82853	8.51125	8.76526	7.40959	9.83077	10.3348		8.51125	9.19465		7.74674	9.51022		7.40959	10.4364		8.43942	8.32446
YJL154C		8.66734	8.64976	9.26943	9.41945	8.69781	8.92858	9.53364	9.53982		9.41945	9.24071		8.66734	8.64976		8.92858	9.3394		9.42729	9.40908
YJL153C		6.58904	9.55306	5.89353	7.08474	7.2493	6.82354	13.4376	12.4399		7.08474	8.04922		6.58904	9.55306		6.82354	7.33163		5.81506	5.6277
YJL152W		11.5753	12.3587	6.47134	11.3271	12.2153	10.8807	13.6268	13.7543		11.3271	11.3906		11.5753	12.3587		10.8807	12.2033		11.2457	11.2769
YJL151C		12.6274	13.4981	11.7928	12.3451	13.1513	11.6787	14.2232	14.4442		12.3451	12.3247		12.6274	13.4981		11.6787	13.049		11.6689	11.7493
YJL150W		6.70145	8.10702	5.83725	6.10594	5.98925	4.92226	7.45298	7.75532		6.10594	6.65036		6.70145	8.10702		4.92226	5.43392		2.78014	4.86026
YJL149W		8.13806	9.44576	7.52195	7.90639	8.4141	7.70812	9.06447	8.80286		7.90639	8.99108		8.13806	9.44576		7.70812	8.42531		7.83737	7.66699
YJL148W		11.0497	8.13052	12.9398	10.3025	9.95433	11.5948	7.89872	6.46186		10.3025	6.92483		11.0497	8.13052		11.5948	6.95542		11.4513	11.2756
YJL147C		7.55268	7.55415	7.5702	7.27041	8.0121	7.57899	7.18788	6.38397		7.27041	7.8422		7.55268	7.55415		7.57899	7.3645		7.56374	7.74462
YJL146W		8.31822	9.19707	8.43119	8.45201	8.61897	8.33935	8.91525	8.83704		8.45201	8.93948		8.31822	9.19707		8.33935	9.01949		8.31375	8.11768
YJL145W		10.1442	9.75925	11.1518	10.3823	9.83296	10.7675	7.28513	5.01913		10.3823	9.81472		10.1442	9.75925		10.7675	11.3093		10.4599	10.2997
YJL144W		6.61597	11.6447	7.09993	11.3933	10.353	7.01053	10.1387	10.9482		11.3933	10.9045		6.61597	11.6447		7.01053	10.8637		6.783	6.89168
YJL143W		13.0629	12.497	12.8352	12.2704	11.4307	12.4531	11.6869	11.4007		12.2704	12.1556		13.0629	12.497		12.4531	12.4303		11.4942	11.5631
YJL142C		9.12411	10.1141	8.03804	9.68492	8.96047	8.2568	12.0505	12.0475		9.68492	10.4273		9.12411	10.1141		8.2568	9.8001		9.33829	9.33053
YJL141C		8.32127	9.72897	7.82398	9.4841	8.97129	7.92793	12.0348	11.9756		9.4841	10.0022		8.32127	9.72897		7.92793	9.79877		8.48673	8.43011
YJL140W		10.7385	10.7462	11.9881	11.1429	11.3887	11.241	9.77911	11.2204		11.1429	11.2848		10.7385	10.7462		11.241	11.4535		11.3771	11.5664
YJL139C		8.82325	9.20277	8.51523	9.57881	8.23823	8.96882	8.67863	8.75732		9.57881	9.93229		8.82325	9.20277		8.96882	9.2036		8.19425	8.28143
YJL138C		14.9207	12.8491	14.4928	13.9161	12.4434	14.6992	12.5059	12.1226		13.9161	12.5015		14.9207	12.8491		14.6992	12.4818		13.2187	14.1952
YJL137C		7.95273	10.3163	7.24053	6.65517	7.85304	8.3128	9.74439	9.73885		6.65517	7.94528		7.95273	10.3163		8.3128	8.29656		7.83689	7.8028
YJL136W-A		6.94686	7.43568	6.45114	4.8979	6.02496	6.67572	7.13391	7.41635		4.8979	6.24488		6.94686	7.43568		6.67572	3.98248		5.783	4.55911
YJL136C		13.9993	12.3213	15.4474	13.6668	12.537	13.8251	9.45264	10.4875		13.6668	12.1246		13.9993	12.3213		13.8251	11.6625		13.9612	14.1079
YJL135W		8.51874	7.65782	5.97506	6.97734	6.8714	7.18567	7.77406	7.70524		6.97734	6.32431		8.51874	7.65782		7.18567	6.12786		4.4474	4.37551
YJL134W		10.5953	9.53792	9.73084	10.0642	9.53548	10.138	10.101	10.6029		10.0642	9.32436		10.5953	9.53792		10.138	9.31356		9.79962	9.7155
YJL133C-A		9.37356	12.0428	9.19563	10.7741	13.7963	9.13776	13.7639	14.0579		10.7741	13.2536		9.37356	12.0428		9.13776	10.3434		8.64694	8.99009
YJL133W		10.2861	9.62407	9.95803	10.3646	10.7619	10.0125	9.74429	9.11679		10.3646	9.97219		10.2861	9.62407		10.0125	9.41746		9.45102	9.17926
YJL132W		6.89356	8.76567	6.52329	5.61747	8.67295	7.00715	8.32169	7.86825		5.61747	6.67171		6.89356	8.76567		7.00715	8.08802		6.59228	6.87269
YJL131C		6.83908	7.7519	8.42257	7.412	8.74537	7.27902	8.30446	9.27336		7.412	8.22589		6.83908	7.7519		7.27902	8.22765		8.60243	8.56225
YJL130C		10.8963	9.34394	10.5565	11.1729	9.17137	11.544	11.4797	10.5392		11.1729	9.78898		10.8963	9.34394		11.544	8.7609		9.76728	9.43259
YJL129C		8.92653	8.09606	8.95479	8.41726	8.01804	9.47806	9.98314	9.59158		8.41726	7.55409		8.92653	8.09606		9.47806	7.97853		8.78242	8.68163
YJL128C		8.98692	8.78305	9.47204	9.16384	8.79736	9.19025	9.88811	9.84837		9.16384	9.22351		8.98692	8.78305		9.19025	9.58699		9.39432	9.41569
YJL127W-A		8.20578	8.97251	6.91758	8.71753	8.51539	8.2173	9.16682	9.33062		8.71753	8.88231		8.20578	8.97251		8.2173	8.77167		8.30495	7.6925
YJL127C-B		10.761	11.5792	11.7472	11.2189	12.1738	10.8892	10.2043	10.8489		11.2189	10.6382		10.761	11.5792		10.8892	11.6794		10.0324	10.1999
YJL127C		6.88125	7.26994	8.02898	7.38108	7.77942	8.05898	7.4141	7.94392		7.38108	7.66403		6.88125	7.26994		8.05898	8.40849		8.34299	8.13092
YJL126W		8.35088	8.49708	9.02946	8.42146	8.27876	8.46955	7.86034	8.05495		8.42146	8.34514		8.35088	8.49708		8.46955	9.25094		8.26608	8.31777
YJL125C		9.70332	8.29458	10.8832	9.84538	9.08449	9.83885	7.85455	7.69944		9.84538	8.35939		9.70332	8.29458		9.83885	7.25982		9.7401	9.52596
YJL124C		11.2259	10.51	12.4091	11.1338	10.8216	11.8606	9.19593	9.41113		11.1338	10.6381		11.2259	10.51		11.8606	11.775		11.6635	11.7059
YJL123C		9.60548	9.50085	11.489	9.38946	10.2245	10.0207	9.3575	10.0054		9.38946	8.85494		9.60548	9.50085		10.0207	10.5901		11.0884	11.1567
YJL122W		11.1618	9.03717	12.9554	10.855	10.2117	11.4562	9.06679	7.50574		10.855	7.76272		11.1618	9.03717		11.4562	6.96179		10.9156	10.8919
YJL120W		11.3716	11.0377	6.05929	9.5024	8.39082	10.2141	9.2043	8.72621		9.5024	9.13304		11.3716	11.0377		10.2141	9.148		6.53591	5.34854
YJL121C		12.8091	12.3963	12.0501	11.7257	10.3755	12.5758	10.6843	10.7184		11.7257	11.24		12.8091	12.3963		12.5758	11.6956		11.7902	11.6891
YJL118W		9.24448	9.05246	9.16955	9.70307	7.82747	9.19879	9.05229	8.0934		9.70307	8.56242		9.24448	9.05246		9.19879	8.78566		8.13092	8.09466
YJL119C		9.25117	8.4806	7.67781	9.3196	7.49459	9.03827	8.88682	7.91176		9.3196	8.13304		9.25117	8.4806		9.03827	8.85978		7.35903	7.22301
YJL117W		12.4589	11.089	12.1045	10.4085	10.1854	11.9779	10.4346	10.5822		10.4085	10.7136		12.4589	11.089		11.9779	11.1004		10.4699	10.3726
YJL116C		8.97769	14.0278	5.50962	8.68375	9.96707	7.80462	16.5578	16.3033		8.68375	8.61071		8.97769	14.0278		7.80462	8.90623		8.04746	7.98795
YJL115W		8.23934	9.02862	10.8221	8.47483	10.3195	8.62561	8.78007	9.38213		8.47483	8.27069		8.23934	9.02862		8.62561	9.428		10.5082	10.663
YJL112W		8.07796	8.61711	9.17425	7.98722	8.17383	8.26187	8.30996	7.51669		7.98722	8.63293		8.07796	8.61711		8.26187	7.81789		8.88334	8.66602
YJL111W		11.6094	10.0195	11.7957	11.3857	10.0539	11.6196	9.99623	9.64527		11.3857	11.0411		11.6094	10.0195		11.6196	10.9617		11.5089	11.3819
YJL110C		7.84209	8.05385	9.06766	7.58542	8.44494	8.55112	8.23532	7.47273		7.58542	8.36156		7.84209	8.05385		8.55112	7.97657		9.03258	8.94132
YJL109C		9.95207	7.85648	10.1867	10.3872	7.42222	10.5144	8.3116	6.14498		10.3872	7.16959		9.95207	7.85648		10.5144	6.32856		9.25203	9.0097
YJL108C		8.07317	7.313	7.80771	9.94101	6.36295	7.84753	10.4815	8.4461		9.94101	13.7746		8.07317	7.313		7.84753	8.40711		6.93613	7.04203
YJL107C		7.08168	7.12985	7.24577	9.45112	5.81084	7.04628	9.7371	7.45034		9.45112	13.1535		7.08168	7.12985		7.04628	7.6878		6.54503	6.50352
YJL106W		6.17653	6.93529	4.82103	7.92573	7.09796	6.57103	7.06531	6.60941		7.92573	7.74536		6.17653	6.93529		6.57103	7.35117		5.68123	5.99043
YJL105W		7.45522	6.86044	4.07112	6.53147	9.78975	7.76905	9.3563	9.15254		6.53147	6.53835		7.45522	6.86044		7.76905	6.96606		6.85082	7.08705
YJL104W		9.93761	9.16229	12.0155	9.35704	10.3027	10.5116	9.11162	9.75644		9.35704	9.22903		9.93761	9.16229		10.5116	10.4791		11.0515	11.021
YJL103C		6.43386	9.32224	6.24386	7.39917	7.27371	6.79101	8.92862	9.12733		7.39917	8.30461		6.43386	9.32224		6.79101	7.32679		6.38265	6.3532
YJL102W		6.95932	8.4632	7.11759	7.49338	5.62776	6.33201	8.10978	8.42534		7.49338	7.86104		6.95932	8.4632		6.33201	7.66032		7.43444	7.33883
YJL101C		9.62203	9.14289	9.67044	10.3719	10.3229	9.7249	10.1778	11.0222		10.3719	9.39799		9.62203	9.14289		9.7249	12.2909		9.64661	9.68105
YJL100W		7.78698	8.52478	8.27246	8.56846	7.99092	7.86041	7.94505	7.1457		8.56846	9.31956		7.78698	8.52478		7.86041	9.11249		7.69116	7.64558
YJL099W		7.49259	7.20462	7.85435	8.45721	8.11894	7.85022	7.38271	6.98252		8.45721	7.9866		7.49259	7.20462		7.85022	8.72954		7.6453	7.40813
YJL098W		8.07636	7.13676	9.61502	8.70253	8.26663	9.08317	7.73072	7.87045		8.70253	5.7011		8.07636	7.13676		9.08317	5.65291		8.91256	8.6672
YJL097W		12.2714	11.5329	11.0216	10.7288	10.7148	12.2551	9.9333	9.79091		10.7288	9.83693		12.2714	11.5329		12.2551	12.0059		10.9719	10.9911
YJL096W		9.56099	10.0283	11.0381	9.5618	9.88515	9.87075	9.26248	9.41524		9.5618	9.80455		9.56099	10.0283		9.87075	9.97903		10.3273	10.4265
YJL095W		7.50759	6.50948	7.55252	7.36138	6.80822	8.1741	7.61641	7.64313		7.36138	7.32846		7.50759	6.50948		8.1741	7.88714		8.06557	7.76285
YJL094C		8.8323	9.46013	7.81116	10.5265	8.36239	9.38526	9.96484	10.001		10.5265	10.3504		8.8323	9.46013		9.38526	9.56298		8.31072	8.29772
YJL093C		9.96004	9.79848	8.62733	9.50903	8.00548	9.87452	8.83755	8.94516		9.50903	10.2427		9.96004	9.79848		9.87452	10.1366		8.77778	8.84871
YJL092W		8.24339	7.77409	8.25271	8.68007	7.32035	8.85041	7.67592	7.914		8.68007	8.41263		8.24339	7.77409		8.85041	8.09289		8.56933	8.6621
YJL091C		10.0413	9.64167	8.9673	10.6552	8.46411	10.0196	8.69656	8.01883		10.6552	10.0098		10.0413	9.64167		10.0196	9.64806		9.16648	9.28625
YJL088W		6.53627	8.30006	8.24626	7.37336	12.0471	6.78313	11.0013	11.2795		7.37336	9.12822		6.53627	8.30006		6.78313	8.93883		6.50714	5.81377
YJL087C		7.71456	6.70296	8.8489	7.62525	7.2678	8.07789	6.25676	6.47858		7.62525	7.28289		7.71456	6.70296		8.07789	7.65623		8.02099	8.1913
YJL085W		7.6471	6.91707	8.6265	7.96675	8.3141	7.92542	7.0754	7.30899		7.96675	8.16391		7.6471	6.91707		7.92542	8.35693		8.29364	8.59501
YJL086C		5.8877	4.80052	7.35866	5.38723	6.18731	5.81077	5.48417	5.60312		5.38723	5.89399		5.8877	4.80052		5.81077	5.39407		2.64784	2.57595
YJL084C		8.07274	8.812	7.93337	7.75802	7.42493	8.57441	10.1187	9.95902		7.75802	8.74848		8.07274	8.812		8.57441	8.77543		7.82977	7.79476
YJL083W		7.67104	8.53006	7.51252	7.6006	7.00829	7.43984	10.0465	9.60313		7.6006	8.49326		7.67104	8.53006		7.43984	7.34599		7.14398	7.42742
YJL082W		8.89843	8.7404	8.78455	8.93607	8.63077	8.41318	11.6818	12.2154		8.93607	9.60052		8.89843	8.7404		8.41318	9.64922		8.4798	8.33816
YJL081C		9.61595	8.9258	10.5793	9.60625	9.48379	10.0852	8.63106	9.23251		9.60625	9.06331		9.61595	8.9258		10.0852	10.0622		10.0525	10.0797
YJL080C		11.4103	9.14079	11.2609	11.3148	8.74651	11.5281	8.97507	8.79643		11.3148	10.1515		11.4103	9.14079		11.5281	9.71992		11.0402	10.835
YJL079C		13.11	13.5362	10.1435	8.94947	14.352	10.6159	16.3598	16.5529		8.94947	9.99501		13.11	13.5362		10.6159	10.74		11.2804	11.547
YJL078C		10.6615	10.3122	9.50306	9.37389	10.5586	10.8504	10.6087	10.8209		9.37389	8.55915		10.6615	10.3122		10.8504	10.1548		9.80149	9.57775
YJL077W-B		9.78582	10.3413	8.71632	8.64575	9.63032	8.87246	10.0344	10.4739		8.64575	8.1047		9.78582	10.3413		8.87246	9.77448		8.54596	8.56154
YJL077W-A		10.7457	10.6148	10.7135	9.08249	11.4228	10.301	10.6317	11.1795		9.08249	8.72476		10.7457	10.6148		10.301	10.3354		8.81984	9.46784
YJL077C		9.70068	9.62139	4.8661	8.39783	10.4359	9.29143	10.0748	10.5125		8.39783	7.93067		9.70068	9.62139		9.29143	9.32611		8.56833	8.70289
YJL076W		9.43002	7.89951	10.1007	9.34805	9.01075	9.91053	8.61691	9.07237		9.34805	8.97929		9.43002	7.89951		9.91053	8.61211		9.98094	9.73635
YJL075C		10.0827	8.07954	5.37652	9.76457	8.98912	10.2147	8.6803	9.27469		9.76457	9.43225		10.0827	8.07954		10.2147	8.74818		10.1718	10.1809
YJL074C		6.73452	6.16385	8.93528	7.0847	7.13213	7.96687	6.01906	5.89473		7.0847	5.49013		6.73452	6.16385		7.96687	7.21126		8.40156	8.568
YJL073W		8.52966	8.08348	8.70865	9.00104	8.42047	8.66884	8.49096	8.87131		9.00104	8.52133		8.52966	8.08348		8.66884	8.29978		9.10983	9.05035
YJL072C		8.99028	8.88759	9.39206	8.96191	9.427	9.21579	7.65923	7.23712		8.96191	8.81326		8.99028	8.88759		9.21579	9.81941		8.56314	8.70774
YJL071W		7.7364	8.20706	8.27646	8.06922	9.12418	8.3001	7.98719	7.92356		8.06922	7.964		7.7364	8.20706		8.3001	8.99882		8.08115	8.05149
YJL070C		7.30375	8.27933	5.90694	7.54584	7.55519	6.69403	8.17644	9.06519		7.54584	8.8627		7.30375	8.27933		6.69403	8.6428		7.31002	7.63532
YJL069C		10.0031	8.49901	10.7254	9.14494	9.09872	9.98047	8.10995	6.93177		9.14494	7.51731		10.0031	8.49901		9.98047	7.09493		9.82276	9.5449
YJL068C		10.3173	12.3931	9.8389	9.67119	10.1684	10.0868	10.852	10.418		9.67119	10.4013		10.3173	12.3931		10.0868	11.6936		10.2804	10.3691
YJL067W		8.93695	10.9688	5.25661	9.38436	10.0418	8.39901	13.4503	13.3729		9.38436	10.7618		8.93695	10.9688		8.39901	10.8248		9.70868	9.61389
YJL066C		8.62067	10.902	9.40968	9.13589	9.86228	8.25638	13.3235	13.1472		9.13589	10.5177		8.62067	10.902		8.25638	10.7132		9.34207	9.33637
YJL064W		9.77063	9.96968	5.69378	9.82577	10.3252	9.65158	8.94998	9.56302		9.82577	10.0595		9.77063	9.96968		9.65158	9.84207		9.48848	9.30696
YJL065C		9.73661	9.8619	10.7275	9.88532	10.3741	9.70499	8.96173	9.55249		9.88532	10.1455		9.73661	9.8619		9.70499	9.88104		9.67377	9.47488
YJL063C		9.94238	9.85561	11.0939	9.6982	9.77692	9.72954	10.6388	10.5565		9.6982	10.0217		9.94238	9.85561		9.72954	10.0777		10.3079	10.3891
YJL062W-A		11.4075	12.3219	11.7524	10.4372	10.9327	11.1071	12.5616	12.2497		10.4372	11.1285		11.4075	12.3219		11.1071	11.8674		10.8436	10.6847
YJL062W		9.91611	9.56027	7.80175	9.27879	8.17926	9.84401	8.73601	8.60582		9.27879	9.6837		9.91611	9.56027		9.84401	9.18764		8.95774	8.83935
YJL061W		9.21985	8.18496	9.67553	9.32964	8.22582	9.81439	7.34901	7.0477		9.32964	8.94652		9.21985	8.18496		9.81439	9.33345		9.24243	9.13672
YJL060W		10.385	10.0026	9.61001	9.44027	11.9138	9.65069	8.97142	9.18925		9.44027	10.5281		10.385	10.0026		9.65069	10.8195		9.55425	9.52816
YJL059W		9.15789	9.942	7.88415	9.39708	8.20384	9.11676	8.65762	8.88314		9.39708	9.46668		9.15789	9.942		9.11676	9.91548		8.2981	8.44984
YJL058C		7.34218	6.35459	7.65035	7.70879	7.28619	7.48968	7.25979	6.80867		7.70879	7.82137		7.34218	6.35459		7.48968	7.63524		7.38554	7.18589
YJL057C		6.86716	8.59007	7.57975	7.93135	8.28838	7.52866	10.2072	10.2948		7.93135	9.17103		6.86716	8.59007		7.52866	10.6834		7.98801	8.15713
YJL056C		7.65942	7.55619	7.75752	5.88419	10.64	7.57916	7.86148	7.71915		5.88419	7.0979		7.65942	7.55619		7.57916	5.82501		7.24199	7.0842
YJL055W		10.829	11.0051	11.279	10.1904	12.1402	10.9221	11.1031	12.0486		10.1904	10.7604		10.829	11.0051		10.9221	11.7746		11.212	11.2484
YJL054W		9.70082	9.28305	10.5587	9.68045	9.56772	10.0039	9.12272	9.2222		9.68045	9.42344		9.70082	9.28305		10.0039	9.77902		9.73904	9.84821
YJL053W		9.16645	9.59265	9.33923	9.79004	9.48065	9.13558	9.69873	10.3508		9.79004	10.1346		9.16645	9.59265		9.13558	11.1791		9.00919	9.12354
YJL052C-A		6.1398	7.28959	5.93657	1.79837	6.25591	3.18227	5.29741	5.48674		1.79837	4.7303		6.1398	7.28959		3.18227	4.19121		4.26843	4.04454
YJL052W		13.314	14.9942	9.31367	15.5165	16.6181	15.0927	19.4279	20.0535		15.5165	14.4483		13.314	14.9942		15.0927	17.4017		13.3018	13.6891
YJL051W		8.9145	8.01398	7.9048	8.29119	7.47888	8.97214	6.95139	7.24976		8.29119	7.67329		8.9145	8.01398		8.97214	7.2513		8.38539	8.12834
YJL050W		9.78233	7.53367	11.1507	9.46329	8.15755	10.4888	7.88818	6.67063		9.46329	6.24398		9.78233	7.53367		10.4888	5.47476		10.2142	10.0589
YJL049W		6.01323	6.98811	8.76093	7.23109	8.50878	6.59149	6.53027	7.51525		7.23109	7.91238		6.01323	6.98811		6.59149	7.51071		8.67424	8.54697
YJL048C		8.46534	10.7073	9.34664	11.0231	8.48879	8.23391	12.0052	11.55		11.0231	11.4838		8.46534	10.7073		8.23391	10.7434		8.34968	8.36121
YJL047C-A		7.92333	7.4587	7.41864	7.79837	6.12409	8.48605	6.44941	7.81931		7.79837	7.7303		7.92333	7.4587		8.48605	8.3595		7.26843	7.34854
YJL047C		6.87846	7.50654	8.16548	7.70126	7.41485	7.45905	7.49613	7.75461		7.70126	7.88401		6.87846	7.50654		7.45905	8.28313		7.55747	7.49256
YJL046W		7.60418	7.80948	8.35141	8.77955	8.15798	8.03031	8.03261	8.3091		8.77955	8.78403		7.60418	7.80948		8.03031	8.72954		8.50333	8.31472
YJL044C		10.1112	9.69299	9.50689	9.73789	10.1153	10.2041	9.13673	9.47939		9.73789	9.85374		10.1112	9.69299		10.2041	9.65249		9.72529	9.82077
YJL043W		5.37673	6.19323	4.19175	5.67892	7.38553	5.73674	7.61934	6.5344		5.67892	5.58532		5.37673	6.19323		5.73674	5.45657		4.74905	5.20768
YJL042W		8.78146	8.85656	8.16713	8.7186	8.39878	8.8437	11.1292	10.7431		8.7186	9.96119		8.78146	8.85656		8.8437	10.0662		8.86127	8.8315
YJL041W		9.73658	9.09078	10.194	9.81386	9.18883	10.0792	8.95964	9.04925		9.81386	9.42286		9.73658	9.09078		10.0792	9.70425		9.9914	9.87322
YJL039C		9.2903	8.31714	8.93419	9.50902	7.15816	9.81279	8.16023	7.65578		9.50902	9.09407		9.2903	8.31714		9.81279	8.59599		8.75379	8.78947
YJL038C		7.36838	9.75728	4.12914	5.17182	8.7676	7.07627	6.64533	6.86861		5.17182	5.75916		7.36838	9.75728		7.07627	7.20246		5.97892	6.26067
YJL037W		4.14795	9.08172	4.59672	5.18916	8.74499	5.73867	6.61291	6.69533		5.18916	5.11292		4.14795	9.08172		5.73867	6.55869		4.0985	4.28965
YJL036W		8.83762	8.80004	8.92524	9.07185	9.29301	8.15087	9.15351	9.33499		9.07185	9.19262		8.83762	8.80004		8.15087	9.81145		9.10084	8.91983
YJL035C		9.04944	7.65116	9.61027	9.05113	8.06651	8.69246	8.97871	9.79519		9.05113	8.46343		9.04944	7.65116		8.69246	7.64395		8.23352	8.39241
YJL034W		12.4033	12.0264	12.0557	14.324	11.7152	13.053	13.9179	13.8023		14.324	13.9145		12.4033	12.0264		13.053	13.5409		12.392	12.3143
YJL033W		9.72888	7.40931	11.0026	9.41731	8.55916	10.2737	7.45081	6.92774		9.41731	4.41066		9.72888	7.40931		10.2737	5.68049		9.73786	9.52965
YJL032W		8.48445	8.65906	4.62025	10.0463	9.11766	8.86069	8.41288	9.05635		10.0463	9.43485		8.48445	8.65906		8.86069	10.6207		9.631	9.63711
YJL031C		8.25169	8.41095	8.91667	9.71399	9.06796	8.68472	8.31448	9.17855		9.71399	9.05268		8.25169	8.41095		8.68472	10.4005		9.20333	9.23836
YJL030W		8.3884	8.15043	10.0776	9.17243	9.15349	9.09088	8.21645	8.97669		9.17243	8.55946		8.3884	8.15043		9.09088	9.6477		9.14821	9.41998
YJL029C		8.17941	8.66164	8.84767	8.69411	7.9001	8.8847	8.53264	8.07423		8.69411	8.64205		8.17941	8.66164		8.8847	8.28781		8.70327	8.57855
YJL028W		4.07838	7.04688	4.45114	1.31294	5.2243	2.69684	5.13391	4.2237		1.31294	1.07495		4.07838	7.04688		2.69684	3.31581		2.783	2.55911
YJL027C		5.57976	5.99258	5.29156	4.95555	4.13036	4.95667	6.70985	3.91212		4.95555	3.85083		5.57976	5.99258		4.95667	3.95964		4.47142	3.39953
YJL026W		12.7549	13.9087	12.2047	12.2991	11.7067	13.1314	13.6668	12.6673		12.2991	11.277		12.7549	13.9087		13.1314	14.0051		11.6242	11.669
YJL026C-A		13.1596	14.2627	6.85476	12.6799	12.055	13.6608	14.1497	13.0722		12.6799	11.6714		13.1596	14.2627		13.6608	14.512		11.7903	11.9052
YJL025W		8.20505	7.10982	8.12767	7.02176	7.52713	8.71984	6.79082	5.81519		7.02176	6.93187		8.20505	7.10982		8.71984	6.34476		8.06574	7.92789
YJL024C		9.67318	9.56548	9.87631	9.85224	9.45411	9.46227	7.86703	8.55692		9.85224	9.01991		9.67318	9.56548		9.46227	10.0118		9.18834	8.98067
YJL022W		6.72868	8.10027	5.148	7.55274	7.98527	7.5993	8.12266	8.4914		7.55274	7.17309		6.72868	8.10027		7.5993	7.69266		6.71121	6.73886
YJL023C		7.35657	8.59912	7.98151	8.13268	8.58276	7.96043	8.44786	8.80313		8.13268	7.90697		7.35657	8.59912		7.96043	8.24773		7.80562	8.02972
YJL020W-A		9.20142	9.97961	6.1452	8.61289	8.89142	9.14319	10.636	11.0805		8.61289	10.0504		9.20142	9.97961		9.14319	10.6916		10.334	10.359
YJL020C		9.03749	9.77642	9.27607	8.66526	8.74248	9.22661	10.8248	11.1952		8.66526	10.0278		9.03749	9.77642		9.22661	10.7767		9.84756	9.78813
YJL019W		8.34985	8.3287	8.07201	7.8619	7.47858	8.49047	7.65068	7.58275		7.8619	8.20212		8.34985	8.3287		8.49047	7.57462		8.42254	8.16882
YJL016W		9.38308	10.5092	8.22669	9.84812	9.72332	9.1842	12.5689	11.8641		9.84812	9.19857		9.38308	10.5092		9.1842	9.17876		8.97557	8.88787
YJL015C		8.66832	9.74636	4.76464	9.31531	8.82445	8.35183	12.0649	11.4187		9.31531	8.8632		8.66832	9.74636		8.35183	8.39998		8.63521	8.59247
YJL014W		11.6804	10.18	11.9291	11.5457	10.099	11.8623	10.5496	10.3569		11.5457	10.786		11.6804	10.18		11.8623	11.6053		11.3124	11.1847
YJL013C		7.09564	7.25719	8.34136	8.08491	8.07341	7.78609	7.78303	8.34176		8.08491	8.30153		7.09564	7.25719		7.78609	8.27377		8.52164	8.50159
YJL012C		12.5551	10.8547	12.4353	9.71256	9.43893	12.3352	10.6534	10.4973		9.71256	9.75332		12.5551	10.8547		12.3352	11.0319		9.79147	9.79575
YJL011C		9.02744	7.19567	10.8677	8.75199	9.0382	9.7836	6.18637	5.92825		8.75199	8.40664		9.02744	7.19567		9.7836	6.9875		9.54513	9.41702
YJL010C		9.29411	7.0111	10.3072	9.32465	7.93707	9.82273	7.35153	6.75505		9.32465	7.35251		9.29411	7.0111		9.82273	6.82086		9.42798	9.32922
YJL009W		11.475	9.65069	6.15128	11.5719	9.60334	11.8003	9.98043	9.61034		11.5719	10.9557		11.475	9.65069		11.8003	11.5475		11.392	11.4816
YJL008C		11.3414	9.91377	11.7225	11.2229	9.81806	11.6594	9.96889	9.50813		11.2229	10.6831		11.3414	9.91377		11.6594	11.6234		11.3973	11.3182
YJL007C		4.32349	5.16031	4.54425	4.40605	4.6409	4.23059	2.90509	4.09442		4.40605	4.69162		4.32349	5.16031		4.23059	4.01137		4.46107	4.38918
YJL006C		7.89404	7.97848	8.35463	8.07736	8.78707	8.07147	7.39843	7.79075		8.07736	8.61793		7.89404	7.97848		8.07147	7.88747		8.43042	8.50055
YJL005W		7.90079	7.65809	7.7582	7.563	7.36749	8.36403	10.7413	10.8513		7.563	8.90543		7.90079	7.65809		8.36403	8.96415		8.55505	8.5206
YJL004C		10.7691	10.6668	10.1802	10.4194	9.9069	10.7029	10.0788	10.2148		10.4194	10.5022		10.7691	10.6668		10.7029	10.3114		9.57614	9.80024
YJL003W		9.20756	9.8594	9.35189	8.64754	9.89638	8.81023	9.69606	10.2714		8.64754	9.6546		9.20756	9.8594		8.81023	9.70759		8.88536	9.09938
YJL002C		12.6658	11.3627	11.2668	12.0019	10.4686	12.7603	10.7487	10.8066		12.0019	12.1824		12.6658	11.3627		12.7603	12.3202		11.5278	11.5086
YJL001W		12.0479	11.9695	12.0745	12.5401	11.4848	11.6364	11.4692	11.302		12.5401	12.6059		12.0479	11.9695		11.6364	13.1175		11.3104	11.3683
YJR001W		11.129	10.5403	10.0796	11.2174	9.42332	11.2531	11.1712	10.548		11.2174	10.99		11.129	10.5403		11.2531	11.2377		10.0125	10.0306
YJR002W		10.3758	8.76031	11.4516	10.068	9.02245	10.9041	9.13294	8.32		10.068	7.24353		10.3758	8.76031		10.9041	8.1815		10.3447	10.0657
YJR003C		8.73255	7.5119	9.54909	9.56094	8.55712	9.45945	7.59697	7.44451		9.56094	8.45892		8.73255	7.5119		9.45945	7.53046		8.98584	8.74403
YJR004C		8.88725	8.94114	7.64581	8.93554	10.065	8.83671	9.02771	8.8559		8.93554	8.94253		8.88725	8.94114		8.83671	9.41224		7.8137	7.86544
YJR005W		8.41201	7.89794	9.47222	9.26879	8.59657	8.93586	8.84202	9.28021		9.26879	9.41132		8.41201	7.89794		8.93586	9.73439		9.26379	9.10412
YJR007W		12.3456	10.8008	12.3788	12.0035	10.1852	12.4096	10.209	9.31533		12.0035	10.9984		12.3456	10.8008		12.4096	11.4231		11.9852	11.8001
YJR008W		7.36026	11.3817	7.54376	8.75955	9.66961	7.49153	11.0612	12.1523		8.75955	9.49745		7.36026	11.3817		7.49153	10.252		7.91313	8.11333
YJR010C-A		11.0994	10.0246	11.0752	9.96829	9.74119	10.6524	10.3069	10.4548		9.96829	9.97423		11.0994	10.0246		10.6524	9.92413		9.85339	10.0361
YJR011C		7.97849	8.31839	8.13787	8.30846	8.55318	7.73861	7.89879	7.90453		8.30846	8.20203		7.97849	8.31839		7.73861	8.21085		7.80486	7.8426
YJR013W		9.49581	9.44424	8.82142	9.40313	8.38579	9.55118	8.76848	8.93618		9.40313	9.60888		9.49581	9.44424		9.55118	9.06632		9.08189	9.05501
YJR012C		8.6227	8.67911	8.64138	8.55171	8.66225	8.48364	8.05845	8.67808		8.55171	9.1126		8.6227	8.67911		8.48364	8.08226		8.13784	7.96777
YJR014W		11.4869	10.8085	12.6999	11.0033	10.8399	11.4662	9.20671	9.16451		11.0033	9.96678		11.4869	10.8085		11.4662	11.6325		11.6314	11.6533
YJR015W		11.6696	10.6886	10.2374	10.4352	9.37963	11.4636	8.72282	8.44569		10.4352	10.5416		11.6696	10.6886		11.4636	11.1912		10.087	9.97044
YJR016C		12.9389	11.1234	13.2236	11.9991	12.9661	13.8556	11.2802	11.9308		11.9991	10.9802		12.9389	11.1234		13.8556	11.044		11.9583	11.8414
YJR018W		11.4612	11.2234	7.42063	10.0656	10.6051	10.597	10.2318	10.1752		10.0656	10.2581		11.4612	11.2234		10.597	10.9437		10.0465	10.0672
YJR017C		11.6835	11.4981	11.8761	10.6131	11.0401	11.1144	10.758	10.7217		10.6131	10.7728		11.6835	11.4981		11.1144	11.526		11.018	10.9555
YJR020W		9.48321	11.7027	5.61608	8.6159	8.86111	8.35914	9.33271	8.9131		8.6159	9.79179		9.48321	11.7027		8.35914	9.19631		7.4398	7.53141
YJR019C		9.43912	11.8498	8.01224	9.02553	9.32173	8.73409	9.85287	9.44138		9.02553	10.2715		9.43912	11.8498		8.73409	9.73034		8.04604	8.08962
YJR021C		7.55261	9.29589	8.33686	8.33866	9.17276	8.39083	8.77275	9.16481		8.33866	8.77534		7.55261	9.29589		8.39083	9.12973		8.31346	8.33084
YJR022W		6.54885	5.38568	9.2901	7.62434	9.17717	6.9527	6.36154	7.17026		7.62434	8.06673		6.54885	5.38568		6.9527	7.25843		8.53692	8.49199
YJR023C		7.82877	7.26191	5.63689	8.00257	8.97345	6.99655	6.30813	7.06451		8.00257	8.12		7.82877	7.26191		6.99655	7.48095		9	8.99154
YJR024C		11.1567	10.6931	11.5493	11.0118	9.61659	11.3887	8.75416	8.17581		11.0118	10.5855		11.1567	10.6931		11.3887	11.0071		10.1008	10.1743
YJR025C		9.64931	11.1602	11.4389	11.5122	12.6024	9.90128	7.37242	7.05175		11.5122	12.254		9.64931	11.1602		9.90128	11.7022		10.5282	10.8274
YJR030C		8.31437	7.81642	8.44551	7.69491	7.74557	8.58703	7.60769	7.15641		7.69491	7.66458		8.31437	7.81642		8.58703	8.07024		8.40047	8.37631
YJR031C		7.86215	7.40298	8.10606	7.90539	6.82076	8.78278	7.21145	7.32549		7.90539	7.17924		7.86215	7.40298		8.78278	6.96908		8.46529	8.23792
YJR032W		8.98265	8.31499	10.1632	9.34138	8.9015	9.60943	7.30106	7.67847		9.34138	8.19542		8.98265	8.31499		9.60943	7.95266		9.5495	9.47762
YJR033C		7.33939	7.98494	7.13765	7.56243	7.36833	7.52432	8.81105	8.44943		7.56243	8.14879		7.33939	7.98494		7.52432	8.66584		7.71447	7.66962
YJR034W		8.43947	8.85007	10.0198	8.66499	9.36362	8.63113	8.6585	10.1525		8.66499	9.09712		8.43947	8.85007		8.63113	9.92135		9.61659	9.87956
YJR035W		5.90637	6.87084	7.55464	6.24737	7.51542	6.68186	7.60062	8.12046		6.24737	6.6908		5.90637	6.87084		6.68186	7.45831		7.33844	7.48894
YJR037W		4.46173	7.30078	4.3345	5.24958	7.12603	5.27313	8.57353	8.95841		5.24958	6.63719		4.46173	7.30078		5.27313	7.26401		6.39771	6.21891
YJR036C		5.94203	7.21589	5.49866	5.92511	7.14041	6.00677	8.42415	8.76215		5.92511	7.26342		5.94203	7.21589		6.00677	7.33939		6.5692	6.79277
YJR039W		6.73677	7.9376	6.41787	7.12158	7.65307	7.02357	9.18009	9.71481		7.12158	7.94336		6.73677	7.9376		7.02357	8.41055		6.76228	6.8944
YJR038C		5.91135	7.32417	4.91563	5.41088	7.41589	5.26406	8.52065	9.61772		5.41088	5.94072		5.91135	7.32417		5.26406	7.37415		4.25645	5.18457
YJR040W		9.58286	8.87265	8.44825	9.4606	8.68223	9.51779	7.89159	7.1202		9.4606	9.61649		9.58286	8.87265		9.51779	10.2779		8.83789	8.812
YJR041C		9.05242	7.20273	9.19908	8.94283	6.85815	9.49971	7.46801	5.03649		8.94283	7.28191		9.05242	7.20273		9.49971	6.03507		8.47672	8.2359
YJR042W		9.40776	8.47948	10.1682	9.43484	8.88023	9.81653	8.32141	7.81189		9.43484	8.7195		9.40776	8.47948		9.81653	9.18486		9.53911	9.52426
YJR043C		8.19591	7.07516	9.76034	8.49786	8.54874	8.81756	5.83643	6.39773		8.49786	7.86785		8.19591	7.07516		8.81756	8.46374		9.13503	8.95188
YJR044C		11.9326	12.8176	10.8202	11.2029	10.7499	11.4805	10.6795	10.5497		11.2029	11.625		11.9326	12.8176		11.4805	12.5867		10.6987	10.7232
YJR045C		12.9677	12.6148	13.0073	13.5067	11.3218	13.1092	14.2837	13.5684		13.5067	13.3665		12.9677	12.6148		13.1092	13.2778		13.1395	13.1343
YJR046W		9.23446	9.31335	9.59558	9.85356	8.94413	9.7201	10.1746	10.4139		9.85356	9.8267		9.23446	9.31335		9.7201	10.6113		9.39669	9.12942
YJR047C		9.69338	6.10022	8.02316	9.97006	13.4606	9.98349	13.7852	13.4704		9.97006	7.34671		9.69338	6.10022		9.98349	8.46418		9.09393	9.14542
YJR048W		11.0906	12.8462	13.411	13.8003	6.57334	10.3672	12.3208	10.9698		13.8003	13.3219		11.0906	12.8462		10.3672	14.1198		10.0087	10.3953
YJR049C		8.77294	9.36663	9.6333	8.68336	10.3158	8.75678	9.68441	10.4914		8.68336	8.32759		8.77294	9.36663		8.75678	9.22951		9.42653	9.25706
YJR050W		8.38378	8.06083	9.49156	8.38231	9.3757	8.3224	7.75906	8.53582		8.38231	8.51141		8.38378	8.06083		8.3224	8.7355		8.71894	8.91195
YJR051W		9.40747	9.63722	9.17733	9.13601	9.48601	9.57206	10.4438	11.373		9.13601	8.97685		9.40747	9.63722		9.57206	10.5806		9.6075	9.65545
YJR052W		7.13297	7.96489	8.01177	8.34196	8.76383	7.75996	8.8234	9.29093		8.34196	8.22045		7.13297	7.96489		7.75996	8.69235		8.1668	8.18759
YJR053W		5.57501	5.95083	7.36882	6.19128	6.78584	7.05191	6.66137	6.47414		6.19128	5.96281		5.57501	5.95083		7.05191	6.20899		7.30558	7.33973
YJR054W		8.7712	7.45407	8.77692	8.96442	8.19315	9.05296	7.35282	7.49732		8.96442	8.73448		8.7712	7.45407		9.05296	8.28249		9.06915	9.01379
YJR055W		7.9371	7.66164	8.93894	8.73411	8.52838	8.3215	7.61056	8.07655		8.73411	7.57127		7.9371	7.66164		8.3215	6.51942		7.92447	8.19654
YJR056C		8.94335	9.16897	9.42241	8.35567	9.3474	8.87977	8.20632	8.25977		8.35567	7.85465		8.94335	9.16897		8.87977	8.54606		8.85136	9.10546
YJR057W		8.79117	8.91974	9.98781	9.62201	9.44577	9.67365	8.9819	10.0988		9.62201	9.64137		8.79117	8.91974		9.67365	9.68331		9.6297	9.65778
YJR058C		10.2537	10.5567	10.2665	10.0555	10.6996	10.1485	10.188	10.9887		10.0555	10.4794		10.2537	10.5567		10.1485	11.2967		10.003	10.3146
YJR059W		9.11805	9.64081	9.05931	8.76675	9.84481	8.36011	10.8845	11.3638		8.76675	10.7177		9.11805	9.64081		8.36011	9.93633		9.39039	9.39725
YJR060W		9.40936	9.61033	10.9673	7.68877	9.18821	9.8304	8.32983	8.43316		7.68877	8.17442		9.40936	9.61033		9.8304	9.45013		9.54032	9.77328
YJR061W		7.70117	8.81907	6.45658	8.01231	7.69245	8.0488	11.1831	11.5399		8.01231	8.45073		7.70117	8.81907		8.0488	8.12989		7.5592	7.68152
YJR062C		9.26265	9.42412	8.42842	9.06736	8.55347	8.9128	8.74303	8.49824		9.06736	9.11456		9.26265	9.42412		8.9128	10.2022		8.37321	8.40036
YJR063W		11.9934	10.0682	12.4215	11.1751	10.4467	11.7643	8.47494	6.73828		11.1751	9.65489		11.9934	10.0682		11.7643	8.17784		11.0602	10.8312
YJR064W		11.5032	10.1303	11.8299	11.512	10.0546	11.8807	10.4831	10.4541		11.512	10.7017		11.5032	10.1303		11.8807	11.3236		11.3648	11.31
YJR065C		11.8976	11.8227	11.2753	11.24	10.7267	11.4338	11.4749	11.3149		11.24	12.0557		11.8976	11.8227		11.4338	12.8143		11.4213	11.4051
YJR066W		7.4416	6.89333	7.35664	6.44933	6.41585	7.72316	9.02794	8.79518		6.44933	7.21087		7.4416	6.89333		7.72316	7.73666		7.41487	7.34562
YJR067C		8.70811	8.77791	9.66523	8.87744	8.78982	8.97001	8.14201	9.03974		8.87744	8.18377		8.70811	8.77791		8.97001	8.16215		9.2735	9.11019
YJR068W		9.43361	8.96674	10.5064	9.20824	9.71249	9.7584	8.05862	9.13764		9.20824	8.70587		9.43361	8.96674		9.7584	9.73272		10.0711	10.133
YJR069C		11.0801	9.30984	11.8648	10.5995	9.59809	11.1476	7.87262	7.98667		10.5995	9.81519		11.0801	9.30984		11.1476	10.1488		10.572	10.9253
YJR071W		11.8049	9.29202	6.43571	10.6686	10.5706	11.4515	9.3563	8.82035		10.6686	7.49438		11.8049	9.29202		11.4515	7.01901		10.9921	10.8474
YJR070C		12.5676	9.92965	13.5701	11.6064	11.2878	12.5754	10.5755	9.9289		11.6064	8.28345		12.5676	9.92965		12.5754	8.02063		12.0082	11.8857
YJR072C		10.8432	9.66185	11.9555	10.4158	10.0001	10.6442	8.86608	9.14102		10.4158	8.95873		10.8432	9.66185		10.6442	9.68489		10.6218	10.4219
YJR073C		11.4564	14.253	11.4378	12.0445	13.2234	11.2608	14.3442	14.1971		12.0445	11.5614		11.4564	14.253		11.2608	13.1719		10.0817	10.2044
YJR074W		9.4042	10.6372	10.7007	9.76967	9.95263	9.50394	10.9943	11.317		9.76967	9.64958		9.4042	10.6372		9.50394	9.49318		9.05397	9.12738
YJR075W		11.041	10.1011	10.8787	10.6737	9.91555	11.3382	10.16	10.3531		10.6737	10.3946		11.041	10.1011		11.3382	10.3064		10.7089	10.7984
YJR076C		10.4072	9.65791	11.1568	10.1125	9.80699	10.4128	9.27204	9.49337		10.1125	9.94508		10.4072	9.65791		10.4128	10.1177		10.5886	10.4851
YJR080C		9.25746	9.94274	9.91149	8.61223	8.98031	8.90978	9.29512	9.52873		8.61223	9.28588		9.25746	9.94274		8.90978	9.38258		9.47244	9.70333
YJR082C		9.34697	9.60916	11.2197	9.26754	10.5317	9.92323	9.30214	10.622		9.26754	9.36003		9.34697	9.60916		9.92323	9.78186		10.115	10.2247
YJR083C		7.91007	7.57811	8.65246	7.8526	8.82054	7.74452	6.95792	6.87832		7.8526	8.27507		7.91007	7.57811		7.74452	8.2813		8.0557	8.5999
YJR084W		8.82299	8.66824	9.40171	8.81444	9.34273	8.52892	7.69877	7.83563		8.81444	8.90174		8.82299	8.66824		8.52892	9.02379		8.4474	8.73891
YJR085C		12.6135	14.4016	12.2206	11.8997	12.2606	11.9304	12.2987	12.7643		11.8997	12.2164		12.6135	14.4016		11.9304	13.2117		11.3583	11.7447
YJR086W		9.70795	10.0929	10.2202	10.3973	10.518	9.79366	6.07285	7.21065		10.3973	10.9567		9.70795	10.0929		9.79366	10.4525		10.6663	10.9625
YJR087W		10.6808	9.37267	7.82506	10.3506	10.3413	10.836	8.03437	8.7796		10.3506	10.5462		10.6808	9.37267		10.836	10.8534		10.7807	10.8379
YJR088C		10.4579	9.80481	10.8718	10.1221	10.2797	10.7033	8.33147	8.76027		10.1221	10.3727		10.4579	9.80481		10.7033	10.7519		10.491	10.5086
YJR089W		7.12199	7.2499	7.73881	7.2025	7.75066	7.82086	7.28222	7.61897		7.2025	7.53273		7.12199	7.2499		7.82086	7.39409		8.09188	8.09889
YJR090C		8.04967	7.43494	8.4665	8.14143	7.80166	8.379	9.14898	9.05096		8.14143	8.5508		8.04967	7.43494		8.379	8.78221		8.54714	8.52845
YJR091C		8.96199	8.88787	8.43608	9.45328	8.54856	8.98524	10.3908	10.0401		9.45328	10.4163		8.96199	8.88787		8.98524	10.3567		8.83967	8.54465
YJR092W		7.86375	7.49601	9.03026	7.62677	7.83125	8.33589	6.51181	7.76278		7.62677	7.37611		7.86375	7.49601		8.33589	5.9008		8.98684	8.68218
YJR093C		9.57413	9.29057	9.62655	8.86472	9.41411	8.99692	9.35718	9.42648		8.86472	9.3671		9.57413	9.29057		8.99692	9.43287		8.99436	9.18328
YJR094C		7.05306	7.83214	6.49961	7.24649	6.3113	6.97529	7.12348	5.28244		7.24649	7.5362		7.05306	7.83214		6.97529	7.00704		7.73836	7.432
YJR094W-A		14.1885	12.678	15.1568	13.6369	12.4389	14.1236	8.9423	9.46311		13.6369	11.4969		14.1885	12.678		14.1236	11.6899		13.2631	13.3412
YJR095W		4.78731	12.3428	3.07511	4.7849	6.05993	4.00825	6.35003	5.58875		4.7849	4.92195		4.78731	12.3428		4.00825	4.62062		4.42489	3.18308
YJR096W		8.74113	11.7207	8.93353	10.1342	10.3843	8.93926	14.6319	15.3084		10.1342	9.69184		8.74113	11.7207		8.93926	12.4716		9.2849	9.65458
YJR097W		8.25271	7.68362	9.38954	8.24409	8.92075	9.25911	6.57702	5.74327		8.24409	5.35457		8.25271	7.68362		9.25911	5.09694		8.67929	8.35063
YJR098C		6.27413	6.545	7.13571	6.66744	7.16861	6.69914	7.4739	7.78877		6.66744	6.99016		6.27413	6.545		6.69914	6.93984		6.84532	6.84522
YJR099W		8.49093	9.67862	9.44938	8.8718	8.96137	9.12641	7.9105	8.15514		8.8718	8.9302		8.49093	9.67862		9.12641	10.1067		9.12788	9.34397
YJR100C		8.85427	9.05763	9.17334	9.04235	9.07114	8.86251	8.69641	8.99801		9.04235	9.34892		8.85427	9.05763		8.86251	9.84049		8.84751	9.1496
YJR101W		10.0204	9.55012	11.0989	9.99108	9.30196	9.87241	9.92058	10.1531		9.99108	9.82864		10.0204	9.55012		9.87241	9.9911		10.2232	10.3157
YJR102C		8.66394	8.94166	9.43268	8.92256	9.10733	9.00283	8.63348	8.72829		8.92256	9.16534		8.66394	8.94166		9.00283	9.96446		8.81984	8.95116
YJR103W		9.84872	10.1445	9.19242	10.9236	9.35319	9.5355	11.7201	10.4477		10.9236	9.42769		9.84872	10.1445		9.5355	11.7591		9.52928	9.58897
YJR104C		14.5567	15.5815	14.6599	13.6996	13.0362	14.616	16.0666	15.8713		13.6996	14.2107		14.5567	15.5815		14.616	17.0945		14.7724	15.0884
YJR105W		13.8053	12.2277	13.5773	12.9817	11.6127	13.8666	12.0207	11.2741		12.9817	12.6134		13.8053	12.2277		13.8666	13.4425		12.593	12.6893
YJR106W		8.04475	8.97263	7.22544	9.5461	6.8049	8.41977	8.8704	8.33826		9.5461	8.95732		8.04475	8.97263		8.41977	9.01126		7.59433	7.5996
YJR107W		9.2157	9.68198	6.8953	9.97873	8.1471	9.32022	9.31809	9.32119		9.97873	9.73103		9.2157	9.68198		9.32022	9.15759		8.64626	8.57438
YJR108W		6.64818	7.45579	6.54126	7.28504	7.62861	6.60788	9.54166	9.86196		7.28504	6.92811		6.64818	7.45579		6.60788	6.4939		4.95809	4.56427
YJR109C		10.153	9.8657	9.51484	10.0884	11.5256	9.43866	9.71896	9.26689		10.0884	7.19518		10.153	9.8657		9.43866	10.6394		8.70315	8.46729
YJR110W		7.65542	7.56659	7.6783	7.36259	8.16369	7.81092	7.41014	8.08075		7.36259	8.57936		7.65542	7.56659		7.81092	9.06962		8.4004	8.34277
YJR111C		9.50779	8.93009	9.29413	9.07121	10.9187	8.77406	8.19069	7.91316		9.07121	8.26199		9.50779	8.93009		8.77406	9.07178		8.65006	8.424
YJR112W		8.60513	8.33872	10.0042	7.63201	10.5439	8.91054	7.18994	8.15795		7.63201	6.71595		8.60513	8.33872		8.91054	7.42903		8.88634	8.9792
YJR112W-A		9.68357	10.8332	10.5841	11.5385	10.3062	10.071	9.833	10.8738		11.5385	11.4164		9.68357	10.8332		10.071	10.6233		9.28169	9.44427
YJR114W		9.9333	10.8881	6.16956	9.76459	10.1402	9.54988	11.0143	10.3652		9.76459	10.2455		9.9333	10.8881		9.54988	10.2621		9.91449	9.93626
YJR113C		9.95847	10.8002	11.288	10.0939	10.3483	9.82984	11.3153	10.6618		10.0939	10.5121		9.95847	10.8002		9.82984	10.5114		10.3573	10.1753
YJR115W		8.40372	9.84193	6.58607	7.91058	6.58688	7.71464	12.1266	11.9359		7.91058	9.73736		8.40372	9.84193		7.71464	6.43256		6.18096	6.86396
YJR116W		10.393	9.91572	9.13078	9.57315	9.63737	10.0855	11.8232	12.1247		9.57315	9.36773		10.393	9.91572		10.0855	9.31128		8.631	8.70207
YJR117W		11.674	11.8308	10.6399	11.6594	9.3188	11.9878	11.6367	10.7503		11.6594	11.8969		11.674	11.8308		11.9878	12.3106		11.0353	10.8768
YJR118C		11.1057	10.5616	10.4579	10.5842	9.75743	10.8382	8.9299	9.08655		10.5842	9.96477		11.1057	10.5616		10.8382	10.5442		10.6114	10.7071
YJR119C		6.36063	7.89423	6.70624	6.12227	8.11023	6.87546	8.42017	7.71955		6.12227	6.80507		6.36063	7.89423		6.87546	6.44022		6.57243	6.90351
YJR120W		11.48	12.9106	8.52877	9.38692	8.45499	9.39702	10.5172	10.6341		9.38692	9.39565		11.48	12.9106		9.39702	9.97568		3.71999	2.4961
YJR121W		14.3697	15.4158	13.0573	13.0433	11.8104	12.8053	14.3527	14.317		13.0433	12.935		14.3697	15.4158		12.8053	13.4913		12.589	12.689
YJR122W		7.58439	8.85329	8.43339	8.14613	8.55885	8.06126	9.29777	9.53283		8.14613	9.02887		7.58439	8.85329		8.06126	10.9506		8.78517	8.72839
YJR123W		16.7356	14.5108	17.0372	16.1309	14.62	16.9808	12.2101	12.8441		16.1309	14.7305		16.7356	14.5108		16.9808	13.9512		16.0368	16.0085
YJR124C		10.4759	8.87277	9.43315	10.0976	8.9323	10.7043	7.59012	6.75298		10.0976	8.58349		10.4759	8.87277		10.7043	8.1923		9.45927	9.21965
YJR125C		10.1172	10.5103	10.4497	9.44222	10.0899	9.73586	9.61403	9.97086		9.44222	10.1822		10.1172	10.5103		9.73586	11.3483		10.3238	10.3223
YJR126C		9.59834	9.34728	8.91731	8.9946	8.77971	9.47744	10.0052	10.3837		8.9946	9.81549		9.59834	9.34728		9.47744	9.60878		9.44662	9.28776
YJR128W		5.29181	6.49711	4.35161	5.88583	6.12148	6.58536	6.79991	7.1497		5.88583	6.08394		5.29181	6.49711		6.58536	6.08009		7.1429	6.69904
YJR127C		8.76943	7.88339	7.01305	7.43195	8.60213	8.36718	11.0431	10.8989		7.43195	7.48216		8.76943	7.88339		8.36718	9.07704		8.66268	8.74875
YJR129C		7.15598	7.55235	9.21855	8.01011	6.56659	8.05296	6.20994	7.19802		8.01011	6.63279		7.15598	7.55235		8.05296	6.82485		7.81032	7.56851
YJR130C		7.62689	8.81158	8.50975	8.43045	10.0924	8.25554	8.39807	8.63479		8.43045	8.07608		7.62689	8.81158		8.25554	10.4224		8.04322	8.19654
YJR131W		8.91653	9.54074	7.86927	8.58781	7.80617	8.97945	8.48183	8.36834		8.58781	8.97069		8.91653	9.54074		8.97945	8.97917		8.57982	8.5496
YJR132W		9.68912	8.55255	9.15651	9.83829	7.53874	10.006	8.12369	8.14891		9.83829	8.41784		9.68912	8.55255		10.006	8.14413		8.76257	8.69556
YJR133W		10.3658	9.87292	10.6073	9.54943	8.93431	10.5458	10.6262	10.7042		9.54943	9.13096		10.3658	9.87292		10.5458	9.64519		9.98985	9.98413
YJR134C		7.62537	7.40883	9.68543	7.8899	8.67136	8.4424	7.53111	8.65998		7.8899	8.01089		7.62537	7.40883		8.4424	8.02714		9.36593	9.4018
YJR135C		6.37677	7.69327	8.77319	8.04629	7.92508	7.75801	6.41288	7.42534		8.04629	6.99222		6.37677	7.69327		7.75801	7.68895		7.74955	7.58886
YJR135W-A		11.9269	11.4627	11.9692	10.9265	10.4427	11.4867	9.86726	9.98344		10.9265	10.1542		11.9269	11.4627		11.4867	11.1867		10.7308	10.8404
YJR136C		8.18589	8.00483	8.64284	8.16075	7.99468	8.23961	7.33286	7.29051		8.16075	8.30076		8.18589	8.00483		8.23961	8.31116		7.83504	8.03577
YJR139C		13.6411	12.9993	12.4473	12.7644	12.9309	13.6364	11.3872	11.6537		12.7644	12.4387		13.6411	12.9993		13.6364	13.716		12.6454	12.6866
YJR140W-A		9.31975	6.59918	6.19064	8.74322	7.82936	9.55907	8.22341	8.30777		8.74322	8.0458		9.31975	6.59918		9.55907	8.27183		8.59036	8.73259
YJR140C		6.92682	6.25146	7.45661	7.21264	6.47265	7.8717	7.35402	7.10428		7.21264	6.39705		6.92682	6.25146		7.8717	7.0481		7.71996	7.72288
YJR141W		8.07985	7.79159	9.73568	8.79239	8.34359	8.81963	7.18762	8.24019		8.79239	7.76354		8.07985	7.79159		8.81963	8.28454		8.63927	8.73373
YJR142W		9.09404	8.58666	9.85005	9.23058	9.47485	9.4457	8.29003	9.26721		9.23058	9.04989		9.09404	8.58666		9.4457	10.8935		9.95946	9.95438
YJR143C		12.2103	10.4486	10.5849	11.3913	9.09615	12.5999	9.26175	9.75014		11.3913	10.676		12.2103	10.4486		12.5999	10.8816		10.5374	10.5913
YJR144W		10.0976	10.4733	11.2782	9.55622	9.96486	9.87814	7.43734	7.58983		9.55622	9.73104		10.0976	10.4733		9.87814	9.61833		10.3653	10.4778
YJR145C		15.4185	13.129	15.9299	14.7404	13.1755	15.4266	10.7212	11.4792		14.7404	13.1383		15.4185	13.129		15.4266	12.9916		14.8175	14.7801
YJR146W		9.39649	10.7115	8.34253	9.68886	8.90448	9.33006	9.49158	8.88796		9.68886	9.27346		9.39649	10.7115		9.33006	9.39387		8.35157	8.30825
YJR147W		10.9824	10.1048	9.8223	9.71925	9.60381	10.9957	10.4444	10.1228		9.71925	9.08446		10.9824	10.1048		10.9957	9.99662		9.70614	9.64534
YJR148W		11.6388	13.399	12.1155	10.2312	11.627	11.9135	10.9359	10.1996		10.2312	10.3856		11.6388	13.399		11.9135	13.1326		12.0156	11.9955
YJR149W		7.63282	8.98225	6.77636	6.5878	8.18452	7.90158	8.79676	8.73185		6.5878	7.68405		7.63282	8.98225		7.90158	8.52002		7.45214	7.77555
YJR151C		6.79052	8.43288	5.76651	8.16431	7.52428	7.05588	9.78124	9.59494		8.16431	8.35678		6.79052	8.43288		7.05588	8.12153		6.30278	6.16896
YJR151W-A		6.79827	6.78709	7.17103	5.61779	5.67939	5.0834	7.33923	7.59567		5.61779	5.6022		6.79827	6.78709		5.0834	4.07272		5.35089	5.279
YJR152W		7.13124	8.02967	7.53564	7.93219	8.26747	7.16248	9.02573	8.77829		7.93219	8.01159		7.13124	8.02967		7.16248	7.47997		7.02646	6.87395
YJR153W		7.0393	7.55177	6.44906	9.24981	7.13339	7.36062	-0.03251	-0.42814		9.24981	8.9646		7.0393	7.55177		7.36062	7.46004		7.06779	7.22807
YJR154W		5.05239	7.31543	6.78638	6.4026	10.121	6.42241	5.46594	5.21118		6.4026	6.24441		5.05239	7.31543		6.42241	7.15297		6.67513	6.66464
YJR155W		7.53496	10.1538	7.36897	7.83715	10.7773	7.26954	11.9743	12.5509		7.83715	7.42162		7.53496	10.1538		7.26954	9.68592		7.22279	7.66547
YKL220C		6.60041	6.58198	6.38971	7.76609	6.68326	7.16957	6.73606	5.81406		7.76609	8.64498		6.60041	6.58198		7.16957	7.45258		5.92198	6.04273
YKL219W		9.89869	9.52123	8.25822	9.71933	8.84439	9.78084	8.39812	8.57919		9.71933	9.27597		9.89869	9.52123		9.78084	9.71026		8.73171	8.9388
YKL218C		8.56203	8.82572	8.84701	10.6755	10.048	8.33839	9.27741	8.96859		10.6755	9.39875		8.56203	8.82572		8.33839	10.2592		8.24844	8.25278
YKL217W		5.56109	15.827	5.25578	7.49683	7.10574	7.129	10.0402	8.29443		7.49683	8.66439		5.56109	15.827		7.129	7.87487		6.22812	6.22662
YKL216W		11.4829	10.052	11.9112	14.2435	12.763	14.0661	10.7231	8.74786		14.2435	13.161		11.4829	10.052		14.0661	10.5684		12.412	12.2534
YKL215C		7.76838	8.26445	8.00055	8.07185	7.12619	8.07907	8.32434	7.70287		8.07185	7.973		7.76838	8.26445		8.07907	8.44289		8.30768	8.10455
YKL214C		9.84368	9.89793	10.4171	9.61026	9.74783	9.87049	8.05543	8.86869		9.61026	9.5148		9.84368	9.89793		9.87049	10.2453		9.80667	10.0109
YKL213C		9	8.85842	9.2535	10.1127	9.09888	9.21413	9.90948	9.99669		10.1127	9.9323		9	8.85842		9.21413	10.1178		9.45969	9.53051
YKL212W		10.8047	9.63469	11.4168	10.8066	9.94804	11.2793	10.4168	10.7803		10.8066	10.1762		10.8047	9.63469		11.2793	10.147		10.8767	10.9456
YKL211C		10.7201	9.4991	11.0202	10.1192	11.5392	10.7953	9.24632	8.8622		10.1192	10.1905		10.7201	9.4991		10.7953	11.7952		10.0522	9.95198
YKL210W		11.0962	10.9924	10.9604	11.3583	10.1448	11.2585	10.8593	10.3509		11.3583	11.735		11.0962	10.9924		11.2585	11.9514		11.2574	11.1528
YKL209C		10.3181	7.4211	10.0725	9.94637	6.83371	10.5809	6.48473	6.45167		9.94637	10.2486		10.3181	7.4211		10.5809	8.91974		10.4316	10.4959
YKL208W		7.24275	8.41637	8.76436	7.69461	8.58958	7.95546	8.32629	8.67152		7.69461	8.62773		7.24275	8.41637		7.95546	9.12092		7.96232	7.87395
YKL207W		12.2834	11.9537	11.562	11.3631	11.2193	12.3957	10.8951	10.9294		11.3631	11.3974		12.2834	11.9537		12.3957	12.7629		11.1791	11.1222
YKL206C		9.18136	9.04402	10.1731	10.2914	9.56238	9.602	9.23273	9.42908		10.2914	9.90765		9.18136	9.04402		9.602	10.4601		9.53549	9.47475
YKL205W		8.81245	7.37732	9.14368	8.94458	7.68316	9.25277	7.32531	7.10495		8.94458	8.05267		8.81245	7.37732		9.25277	7.8462		8.97961	8.96269
YKL204W		8.66859	8.83266	9.88984	8.47779	8.76571	8.57707	8.85437	8.54882		8.47779	9.09588		8.66859	8.83266		8.57707	9.05989		9.71265	9.53659
YKL203C		7.61688	6.89322	7.27203	6.87361	6.44261	7.93119	8.41288	8.36041		6.87361	7.29516		7.61688	6.89322		7.93119	7.24983		7.62548	7.45957
YKL202W		3.36182	4.67832	5.81955	5.86023	9.84693	4.7623	9.62675	10.0289		5.86023	7.45232		3.36182	4.67832		4.7623	4.06637		8.43339	8.92978
YKL201C		7.05365	6.73334	7.21833	7.71461	9.75783	7.35754	9.97918	10.1496		7.71461	8.51106		7.05365	6.73334		7.35754	6.70421		7.98692	8.07001
YKL198C		9.30016	9.56841	9.13378	8.92298	9.19575	8.76304	10.621	11.1987		8.92298	9.26349		9.30016	9.56841		8.76304	7.89278		8.41716	8.44022
YKL197C		7.14789	8.13513	7.72672	7.4389	7.06077	7.8023	7.69995	7.44135		7.4389	6.89743		7.14789	8.13513		7.8023	8.68065		7.36335	7.36708
YKL196C		11.6244	11.3269	12.4736	11.8315	11.006	11.9713	11.1507	10.9368		11.8315	11.5808		11.6244	11.3269		11.9713	11.7665		11.5522	11.5902
YKL195W		9.33592	9.36396	11.1822	10.11	10.0981	10.0381	10.2569	10.5996		10.11	10.5656		9.33592	9.36396		10.0381	10.9733		11.2619	11.2558
YKL194C		8.34972	8.53029	8.37349	7.93608	8.05692	7.97573	8.48556	8.22058		7.93608	9.23017		8.34972	8.53029		7.97573	8.61414		8.59967	8.52158
YKL193C		8.58321	9.69165	8.60947	8.78796	9.69576	8.37825	10.5134	10.9872		8.78796	9.82035		8.58321	9.69165		8.37825	10.4187		9.53836	9.68697
YKL192C		13.6056	13.7187	12.514	12.5313	11.994	12.9999	12.8545	12.3853		12.5313	12.5229		13.6056	13.7187		12.9999	13.7152		12.2873	12.2894
YKL191W		11.4408	10.0893	11.2017	10.6901	8.94538	11.4535	10.1267	9.43177		10.6901	8.37062		11.4408	10.0893		11.4535	8.07865		10.0088	9.93687
YKL190W		11.0635	11.3897	11.2993	10.6616	11.1707	10.8703	10.0613	10.5128		10.6616	10.9508		11.0635	11.3897		10.8703	11.3915		10.5915	10.7011
YKL189W		8.12359	8.72482	8.17593	8.27248	8.54542	7.70608	8.85812	9.28029		8.27248	8.8102		8.12359	8.72482		7.70608	8.15714		8.38113	8.66251
YKL188C		4.87958	8.40647	6.1639	7.89099	7.4427	5.95523	9.04111	8.75708		7.89099	7.77993		4.87958	8.40647		5.95523	7.38138		6.52469	6.35023
YKL187C		7.84487	12.9074	6.72434	8.64977	6.98636	7.37646	10.5922	7.29309		8.64977	8.34435		7.84487	12.9074		7.37646	8.73368		6.6524	6.56571
YKL186C		9.72471	10.432	11.2559	10.1213	11.0426	9.77167	9.01277	9.49645		10.1213	9.1647		9.72471	10.432		9.77167	9.36294		10.5019	10.2909
YKL185W		10.8394	10.7087	10.1055	10.0397	10.331	10.4906	11.212	11.212		10.0397	9.01836		10.8394	10.7087		10.4906	8.28931		10.2259	10.0063
YKL184W		11.4885	10.1924	11.3697	10.7403	8.85469	11.2741	9.2519	8.68285		10.7403	10.4202		11.4885	10.1924		11.2741	11.0542		9.98282	9.89674
YKL183C-A		8.59691	8.25425	5.18475	7.01494	6.73113	7.27883	4.79152	5.07396		7.01494	6.99934		8.59691	8.25425		7.27883	6.5955		7.44061	5.95368
YKL183W		9.53152	8.73682	10.3484	9.21795	9.19889	9.70626	8.16459	8.09604		9.21795	8.84059		9.53152	8.73682		9.70626	8.51311		9.30554	9.39592
YKL182W		12.5706	11.3563	11.8906	12.3549	9.60478	12.3285	13.958	12.9927		12.3549	11.5685		12.5706	11.3563		12.3285	9.6556		11.1087	11.0284
YKL181W		12.9697	10.8951	12.8262	12.4161	10.6659	13.054	10.9746	10.7502		12.4161	10.7824		12.9697	10.8951		13.054	10.317		11.8461	11.8783
YKL180W		15.2257	12.958	15.135	14.5766	12.9796	14.9927	10.6796	11.1913		14.5766	12.8459		15.2257	12.958		14.9927	12.6359		14.3573	14.3904
YKL176C		10.2729	9.96587	9.8249	10.545	9.36515	10.7085	9.55073	9.56396		10.545	10.4741		10.2729	9.96587		10.7085	9.8519		9.07752	9.05206
YKL175W		11.6284	11.514	9.86454	10.559	12.4125	11.2994	10.8368	10.6904		10.559	10.7802		11.6284	11.514		11.2994	11.0328		9.8467	9.72358
YKL174C		9.93351	9.55608	8.95581	10.9703	8.28163	10.0288	9.22052	9.08433		10.9703	9.58758		9.93351	9.55608		10.0288	8.82742		8.93861	8.98276
YKL173W		8.09839	8.0858	8.47643	8.66808	7.60256	8.64322	7.38882	6.85602		8.66808	7.93081		8.09839	8.0858		8.64322	7.90924		8.46027	8.30463
YKL172W		10.1603	7.94365	13.1841	9.27365	10.6905	10.8887	8.25291	7.28959		9.27365	5.98004		10.1603	7.94365		10.8887	7.55241		11.5089	11.4127
YKL171W		7.76065	9.00889	6.49686	7.58606	7.48695	8.06101	9.57117	9.53785		7.58606	8.60538		7.76065	9.00889		8.06101	8.50877		7.93049	7.73575
YKL170W		9.83246	9.97258	11.3199	10.0674	10.175	9.83764	9.65521	10.0086		10.0674	10.1728		9.83246	9.97258		9.83764	10.8409		10.3294	10.2004
YKL169C		9.86236	9.7973	6.12698	10.1454	10.19	9.875	9.68542	10.0407		10.1454	10.2475		9.86236	9.7973		9.875	10.9038		10.5032	10.3765
YKL168C		7.64397	8.22984	6.99237	7.43384	8.0029	7.39335	9.36186	9.76284		7.43384	8.6455		7.64397	8.22984		7.39335	8.63171		7.96504	7.69611
YKL167C		9.71651	9.40667	10.3679	9.30409	9.98783	9.45729	9.58227	9.88336		9.30409	9.8506		9.71651	9.40667		9.45729	10.3444		10.2566	10.1581
YKL166C		8.30957	8.09072	10.0779	8.68217	8.6712	9.22947	7.37141	8.26645		8.68217	8.72487		8.30957	8.09072		9.22947	7.28303		9.40954	9.50393
YKL165C-A		8.12978	7.2298	8.2678	6.64225	6.27486	6.33602	6.4214	6.02576		6.64225	6.95446		8.12978	7.2298		6.33602	4.61772		3.15295	3.23306
YKL165C		9.88956	8.84268	8.95656	11.015	8.63941	9.95997	8.29936	8.51649		11.015	10.1554		9.88956	8.84268		9.95997	8.83077		8.89968	8.88486
YKL164C		14.4052	13.4615	13.1814	13.438	12.8513	13.6971	14.7616	14.5414		13.438	13.9747		14.4052	13.4615		13.6971	11.694		12.8872	12.5052
YKL163W		8.60009	13.6458	6.6055	8.59174	11.9584	8.7952	17.3953	17.1811		8.59174	9.17653		8.60009	13.6458		8.7952	8.55143		8.41155	8.30929
YKL162C-A		5.78931	9.71331	5.58607	5.84019	9.04717	6.52404	7.94691	7.07484		5.84019	5.91032		5.78931	9.71331		6.52404	7.83805		5.91793	4.84604
YKL162C		7.20952	8.32728	5.65954	5.74178	7.60771	6.12889	8.91598	8.80508		5.74178	7.67888		7.20952	8.32728		6.12889	7.76628		6.63616	6.61872
YKL161C		7.06016	8.10387	8.56123	7.72506	9.07146	7.37403	7.25866	6.63208		7.72506	7.41538		7.06016	8.10387		7.37403	8.61221		7.03826	7.00484
YKL160W		11.1687	11.1027	12.2976	10.7642	11.1629	11.4169	9.44632	10.6449		10.7642	10.6981		11.1687	11.1027		11.4169	11.5228		11.7292	11.7231
YKL159C		8.65175	9.05196	8.34915	10.3888	7.94352	8.75324	9.19062	8.84008		10.3888	9.42935		8.65175	9.05196		8.75324	9.1161		8.75725	8.79055
YKL157W		9.95866	10.6403	9.43957	9.66761	9.43083	9.81893	11.5944	11.4567		9.66761	10.239		9.95866	10.6403		9.81893	11.1635		9.8525	9.96726
YKL156W		13.6758	11.6052	14.637	12.9702	12.7861	13.5885	10.1022	10.1982		12.9702	11.1525		13.6758	11.6052		13.5885	10.0138		12.5483	12.6948
YKL156C-A		15.116	12.9994	9.00254	14.1312	14.0608	15.0024	11.2939	11.553		14.1312	12.3069		15.116	12.9994		15.0024	11.3776		12.6625	12.7047
YKL155C		6.89042	7.39201	8.67822	7.56653	8.60259	7.37859	7.20506	7.45427		7.56653	8.26487		6.89042	7.39201		7.37859	7.52575		8.66413	8.90455
YKL154W		9.85481	8.81294	10.8015	9.88842	9.57553	10.2851	7.81198	7.83396		9.88842	9.842		9.85481	8.81294		10.2851	8.91565		9.92518	10.121
YKL153W		17.0452	16.52	8.28793	16.4747	16.6483	17.5425	17.3801	18.3259		16.4747	16.2584		17.0452	16.52		17.5425	17.8298		17.0003	16.8951
YKL152C		17.1075	16.6542	17.2128	16.4537	16.7167	17.5281	17.2787	18.249		16.4537	16.2351		17.1075	16.6542		17.5281	17.8162		16.8772	16.7552
YKL151C		9.32165	12.1401	8.69931	8.96853	11.3587	9.21827	13.5132	14.4058		8.96853	11.5579		9.32165	12.1401		9.21827	11.1655		9.2229	9.51847
YKL150W		10.7769	13.4998	10.7967	11.6276	10.4998	9.93994	13.7494	13.6668		11.6276	13.7212		10.7769	13.4998		9.93994	11.395		10.4635	10.8067
YKL149C		8.21914	8.85507	8.48858	8.47733	8.54399	8.38615	7.36339	7.79199		8.47733	8.4896		8.21914	8.85507		8.38615	8.21739		8.2288	8.23683
YKL148C		10.0877	13.5374	10.0304	10.2619	8.99962	8.33848	12.8842	12.6979		10.2619	11.7518		10.0877	13.5374		8.33848	9.0289		8.83603	9.13387
YKL146W		10.1306	11.0055	8.96617	10.1289	9.138	9.58843	10.8687	10.7277		10.1289	10.6113		10.1306	11.0055		9.58843	10.1953		8.98653	8.9552
YKL147C		9.31679	10.4102	4.648	8.94357	8.39565	8.22973	9.94685	9.89915		8.94357	9.65831		9.31679	10.4102		8.22973	8.86415		8.01238	7.94049
YKL145W		11.3447	11.03	11.8197	11.6512	11.2525	11.465	10.8411	11.2793		11.6512	11.7281		11.3447	11.03		11.465	12.3933		11.703	11.6175
YKL145W-A		12.1299	11.9828	13.0016	12.1689	11.8004	12.0441	11.165	11.6271		12.1689	12.3064		12.1299	11.9828		12.0441	13.1116		12.469	12.3716
YKL144C		9.71311	8.61549	10.695	9.53024	9.28389	10.317	7.55705	7.16142		9.53024	8.47178		9.71311	8.61549		10.317	8.12896		9.80984	9.63551
YKL143W		9.35633	7.59959	11.4603	9.51616	8.65266	10.3157	7.35381	7.10719		9.51616	4.46727		9.35633	7.59959		10.3157	6.95534		10.1753	10.1158
YKL142W		9.97356	12.2882	10.682	11.3668	11.3389	10.0384	11.8188	12.6787		11.3668	12.1069		9.97356	12.2882		10.0384	13.2107		11.0569	11.3051
YKL141W		12.1112	14.7347	10.1268	11.293	11.0194	11.3881	13.2813	13.289		11.293	12.2861		12.1112	14.7347		11.3881	11.8862		11.0171	11.125
YKL140W		9.52496	9.38579	9.31541	9.25863	9.21006	9.60968	10.1688	10.5356		9.25863	9.91382		9.52496	9.38579		9.60968	10.0467		9.39056	9.38359
YKL139W		7.64705	7.44716	8.67257	8.00686	8.24482	7.97698	7.2657	7.4102		8.00686	7.97089		7.64705	7.44716		7.97698	7.57326		8.99032	8.89761
YKL138C-A		9.1819	9.67582	10.8246	9.8552	10.306	10.3089	8.79383	9.35181		9.8552	9.51125		9.1819	9.67582		10.3089	10.3358		9.76485	10.1171
YKL138C		9.30802	9.7516	11.1165	9.98279	9.88787	9.90101	9.6677	10.3741		9.98279	10.1291		9.30802	9.7516		9.90101	10.3331		10.9722	11.0851
YKL137W		8.91354	9.73688	11.0913	9.12992	9.86529	9.62044	9.21286	10.3172		9.12992	9.2917		8.91354	9.73688		9.62044	9.96548		10.2176	10.4526
YKL136W		9.75057	9.0374	5.5717	10.0748	9.57458	9.6436	9.77837	9.52597		10.0748	10.2751		9.75057	9.0374		9.6436	10.6918		9.79246	9.57171
YKL135C		9.17916	9.04665	9.44908	9.49483	9.27874	9.35116	9.5112	9.24244		9.49483	9.55796		9.17916	9.04665		9.35116	10.4089		9.294	9.26295
YKL134C		7.14278	8.09669	7.72825	7.13699	7.30344	7.59449	7.52486	7.30886		7.13699	8.33783		7.14278	8.09669		7.59449	7.62053		7.83523	7.90714
YKL133C		6.34968	8.67722	6.37444	6.5977	8.10867	6.60983	7.68022	8.13391		6.5977	8.05775		6.34968	8.67722		6.60983	8.23527		7.14177	7.18405
YKL131W		7.79095	6.02981	3.96755	8.0349	7.18044	7.64034	8.22079	9.29251		8.0349	6.79691		7.79095	6.02981		7.64034	6.18359		7.31734	7.28498
YKL132C		7.9006	7.00452	7.1346	8.57576	7.44615	7.91046	8.59911	9.68161		8.57576	7.15867		7.9006	7.00452		7.91046	6.61257		7.607	7.94683
YKL130C		9.995	9.33929	10.0987	9.37283	9.22995	9.79264	8.1304	8.79497		9.37283	9.54219		9.995	9.33929		9.79264	9.2227		9.41017	9.58133
YKL129C		7.10532	8.14174	7.48696	7.78499	7.71958	7.24892	8.80017	9.46667		7.78499	8.53911		7.10532	8.14174		7.24892	9.06214		8.47601	8.41146
YKL128C		10.8915	8.50631	10.9142	10.8375	10.4892	10.837	9.29558	9.5061		10.8375	10.4542		10.8915	8.50631		10.837	11.4439		10.361	10.4228
YKL127W		11.0741	9.11907	10.8719	10.8437	9.13048	10.8667	8.30434	8.13514		10.8437	10.6466		11.0741	9.11907		10.8667	10.3639		10.5018	10.4512
YKL126W		10.7827	10.0075	9.41434	10.4981	9.48704	10.3756	10.5326	10.4784		10.4981	10.9241		10.7827	10.0075		10.3756	11.5665		10.0243	9.99265
YKL125W		8.83532	8.44264	9.4449	8.60539	8.71932	9.04057	9.16076	9.09901		8.60539	7.80564		8.83532	8.44264		9.04057	7.4502		9.04057	8.79749
YKL124W		7.34288	8.85255	7.232	7.43424	8.91054	6.97139	10.0045	9.95144		7.43424	8.88044		7.34288	8.85255		6.97139	7.63876		7.52939	7.62396
YKL123W		7.50249	8.68953	7.48646	7.541	8.95283	6.95486	9.82541	9.74281		7.541	9.1974		7.50249	8.68953		6.95486	7.54324		8.43456	8.61725
YKL122C		10.3638	9.41536	11.9919	9.99476	10.8292	10.2885	7.68645	8.4896		9.99476	9.50401		10.3638	9.41536		10.2885	8.88597		11.198	11.203
YKL121W		7.34307	8.25652	6.48145	7.88573	8.11417	7.0702	8.8313	8.89987		7.88573	8.72616		7.34307	8.25652		7.0702	8.05072		7.63531	7.65243
YKL120W		9.22724	8.1579	12.7376	10.0108	12.4094	11.9288	7.98928	8.39904		10.0108	8.55203		9.22724	8.1579		11.9288	10.4522		10.4773	10.3163
YKL118W		8.29074	7.78852	4.55806	8.55941	7.79794	7.26637	6.00636	6.91558		8.55941	8.37662		8.29074	7.78852		7.26637	7.67429		5.69727	7.06595
YKL119C		9.56635	8.42127	9.98872	9.73827	9.29168	9.6046	7.53687	7.97661		9.73827	9.65098		9.56635	8.42127		9.6046	9.76541		9.51495	9.558
YKL117W		12.6088	12.4012	13.1015	12.5793	11.9268	12.6417	12.2153	12.513		12.5793	12.4454		12.6088	12.4012		12.6417	13.3778		13.0654	13.085
YKL116C		9.18577	8.59488	9.1682	9.4544	8.61247	9.11453	8.60537	8.92008		9.4544	9.31186		9.18577	8.59488		9.11453	8.55232		8.85154	8.64862
YKL115C		7.85453	7.61329	7.79352	7.29633	7.55409	6.76006	7.22977	7.21265		7.29633	7.49993		7.85453	7.61329		6.76006	6.6374		7.41491	7.1289
YKL114C		9.16119	8.65414	10.4268	9.45238	9.62387	9.66681	7.57151	7.76623		9.45238	9.20658		9.16119	8.65414		9.66681	9.83819		9.7707	9.91078
YKL113C		9.52174	8.94105	10.8344	8.50199	10.5211	9.58397	7.16742	7.19709		8.50199	7.94676		9.52174	8.94105		9.58397	9.37284		10.3311	10.3467
YKL112W		8.75965	9.12482	9.68915	8.24303	9.53541	9.34718	8.56511	8.06115		8.24303	8.40895		8.75965	9.12482		9.34718	7.87663		9.85438	9.65202
YKL111C		9.60782	9.96197	5.93082	8.8521	9.77201	9.79802	8.82321	8.54563		8.8521	8.93914		9.60782	9.96197		9.79802	8.17897		10.4834	10.1705
YKL110C		9.10569	8.4596	10.9324	10.3884	9.73568	9.89839	10.6032	9.86425		10.3884	7.8823		9.10569	8.4596		9.89839	8.27093		9.67511	9.63747
YKL109W		9.88796	10.8456	8.86008	9.65366	7.92988	8.24812	12.9439	12.6599		9.65366	8.86728		9.88796	10.8456		8.24812	8.28407		9.05898	9.19979
YKL108W		7.30114	7.20646	9.09305	6.7116	8.31037	7.62188	7.50014	8.21094		6.7116	7.33188		7.30114	7.20646		7.62188	8.12561		8.34877	8.55611
YKL107W		6.43153	10.7769	4.35085	6.28711	6.73468	5.9482	9.07792	10.0244		6.28711	7.06561		6.43153	10.7769		5.9482	9.33053		5.31423	4.94278
YKL106C-A		5.5638	9.17236	6.08857	3.79837	4.59807	3.71059	7.61934	7.85597		3.79837	6.14534		5.5638	9.17236		3.71059	6.23685		4.11642	5.19654
YKL106W		10.0167	9.13033	10.6657	9.96944	9.6669	10.1642	7.98403	7.26771		9.96944	9.58274		10.0167	9.13033		10.1642	9.05437		9.5284	9.37777
YKL105C		7.38366	7.88598	7.88048	7.47122	8.11106	8.1138	7.95722	8.34807		7.47122	8.07288		7.38366	7.88598		8.1138	8.82451		8.34831	8.45468
YKL104C		11.7746	10.8773	10.9863	11.7782	10.0319	11.2715	11.0911	10.6718		11.7782	11.3524		11.7746	10.8773		11.2715	11.3226		10.8125	10.7594
YKL103C		8.23108	10.5939	8.60835	9.1446	11.1629	7.80902	12.799	12.6669		9.1446	10.8776		8.23108	10.5939		7.80902	12.6291		10.0103	10.2898
YKL102C		4.86531	5.07061	5.16207	7.97143	5.47428	5.02801	5.40634	5.01071		7.97143	6.53181		4.86531	5.07061		5.02801	5.23952		4.50289	4.431
YKL101W		8.21319	6.74572	9.40927	8.80317	7.56185	9.04933	7.82192	7.56619		8.80317	8.58632		8.21319	6.74572		9.04933	8.72403		9.72362	9.69355
YKL100W-A		12.0419	12.5102	6.42761	11.2982	9.83526	11.7225	11.9316	11.271		11.2982	12.0669		12.0419	12.5102		11.7225	13.118		10.4383	10.5658
YKL100C		10.735	11.5773	9.31147	10.6577	9.03159	10.7946	11.1057	10.5767		10.6577	11.2598		10.735	11.5773		10.7946	12.193		9.89053	9.74715
YKL099C		9.71722	8.03197	11.6811	9.33734	9.26797	10.3388	7.70307	7.88152		9.33734	6.72454		9.71722	8.03197		10.3388	7.25421		10.0864	10.0468
YKL098W		9.51461	9.34892	9.22057	9.34384	9.56399	9.18891	9.29287	9.32297		9.34384	9.24946		9.51461	9.34892		9.18891	9.56796		8.6301	8.94154
YKL097C		4.9397	4.27652	4.16046	5.23172	4.42877	3.04179	5.98073	3.93303		5.23172	6.0322		4.9397	4.27652		3.04179	3.74844		2.34032	3.42043
YKL096C-B		14.1043	14.0131	7.61686	10.8964	8.51478	8.23305	12.2586	12.3645		10.8964	10.3548		14.1043	14.0131		8.23305	6.87797		3.9465	3.87461
YKL096W-A		18.2271	17.7494	16.5379	16.6787	13.3599	16.7194	17.1379	17.451		16.6787	16.0082		18.2271	17.7494		16.7194	15.799		16.5878	16.5792
YKL096W		11.6205	11.7993	12.0858	9.42894	9.14591	11.7719	12.944	10.2783		9.42894	15.4242		11.6205	11.7993		11.7719	12.2853		11.9456	12.2327
YKL095W		6.99857	8.04791	8.13312	8.02684	8.55762	7.38736	7.5505	8.20287		8.02684	8.97007		6.99857	8.04791		7.38736	8.68116		7.67569	7.8862
YKL094W		9.97337	10.8898	10.9166	10.633	11.3799	10.4528	11.9954	12.4053		10.633	11.1841		9.97337	10.8898		10.4528	12.5021		10.5858	10.557
YKL093W		8.65463	11.2065	5.37855	9.94811	8.31195	8.74102	11.4596	10.5026		9.94811	9.93848		8.65463	11.2065		8.74102	9.56318		7.60723	7.70899
YKL092C		7.22179	6.86565	7.95512	7.35587	6.82864	7.63447	5.71896	5.68373		7.35587	7.7433		7.22179	6.86565		7.63447	7.84136		7.82482	7.84743
YKL091C		7.57889	10.0103	8.38015	8.84515	8.94242	7.90759	11.3836	11.8389		8.84515	11.1135		7.57889	10.0103		7.90759	10.8319		8.68463	9.01248
YKL090W		7.76551	7.87032	8.45053	7.81973	8.21494	7.96094	8.13326	8.01049		7.81973	8.11303		7.76551	7.87032		7.96094	8.68733		7.85122	7.88392
YKL089W		6.58061	6.56562	8.37731	7.17688	7.91033	7.43159	6.69596	6.5213		7.17688	7.14315		6.58061	6.56562		7.43159	7.63496		8.02623	8.31
YKL088W		7.99587	7.34233	9.47993	8.01027	8.96126	8.33202	8.55222	9.33296		8.01027	8.2012		7.99587	7.34233		8.33202	8.7705		8.88992	8.87823
YKL087C		8.87983	9.93766	10.2613	9.65192	9.46598	9.25127	11.0558	11.0052		9.65192	9.95269		8.87983	9.93766		9.25127	11.3515		9.9007	10.2477
YKL086W		6.6227	9.59412	5.62698	4.70526	9.32863	7.9416	10.0869	8.56355		4.70526	7.01159		6.6227	9.59412		7.9416	14.0555		7.76028	7.56286
YKL085W		11.0015	13.7398	11.3768	10.6142	11.0145	10.4852	13.2615	13.5296		10.6142	11.0651		11.0015	13.7398		10.4852	12.134		11.3082	11.527
YKL084W		10.6785	9.28489	10.2134	9.72971	10.4799	10.649	8.34888	8.58216		9.72971	8.69142		10.6785	9.28489		10.649	10.7584		9.71999	9.57884
YKL083W		8.93566	7.64852	7.85735	8.77844	9.98956	9.70544	7.87059	8.64226		8.77844	6.95102		8.93566	7.64852		9.70544	7.39961		11.2078	11.3388
YKL082C		8.70805	7.28183	12.0098	8.63967	9.88488	9.63733	7.74928	8.70676		8.63967	6.63707		8.70805	7.28183		9.63733	6.62325		11.0434	11.1924
YKL081W		15.1446	12.4423	14.4721	13.6831	11.3668	14.8717	10.4433	9.48904		13.6831	12.3009		15.1446	12.4423		14.8717	12.6092		13.9916	13.9598
YKL080W		13.1273	11.5025	12.2614	11.8733	11.5339	12.6912	10.8859	11.0755		11.8733	11.8256		13.1273	11.5025		12.6912	12.405		12.0394	12.0383
YKL079W		7.29808	7.20281	9.09016	8.02499	8.31602	8.26644	8.06694	8.63214		8.02499	7.87239		7.29808	7.20281		8.26644	9.06971		8.98883	8.84171
YKL078W		8.49526	6.85365	9.56753	8.53631	6.82801	9.38143	6.2657	4.94807		8.53631	3.03117		8.49526	6.85365		9.38143	4.42265		8.4505	7.98359
YKL077W		11.5907	10.9545	11.4515	11.0457	10.036	11.628	10.2141	10.6207		11.0457	10.7858		11.5907	10.9545		11.628	11.276		11.0259	11.0268
YKL076C		9.17696	8.4392	9.9327	8.75692	9.56525	8.98238	8.72786	9.7394		8.75692	9.00384		9.17696	8.4392		8.98238	8.96656		9.41053	9.70829
YKL075C		8.11245	7.96624	9.42385	8.34907	9.27959	8.50972	8.24114	9.32409		8.34907	8.39512		8.11245	7.96624		8.50972	8.56211		8.86083	8.89131
YKL074C		8.61671	7.37742	9.30273	8.88325	8.57737	8.58894	7.84173	8.27734		8.88325	8.1047		8.61671	7.37742		8.58894	7.89356		8.58488	8.62382
YKL073W		9.02057	8.4041	9.4396	10.4231	8.40733	9.76796	8.76544	9.28142		10.4231	9.56017		9.02057	8.4041		9.76796	8.39302		9.32339	9.20144
YKL072W		7.25275	6.13705	8.2382	7.02706	8.56042	8.04492	8.30771	8.20096		7.02706	7.04406		7.25275	6.13705		8.04492	6.7805		8.28804	8.13996
YKL071W		8.70537	8.16329	6.04758	9.01704	8.09989	9.33589	9.39507	9.93233		9.01704	9.19635		8.70537	8.16329		9.33589	13.5546		8.10829	8.2942
YKL070W		9.26582	9.74054	4.92511	9.88583	9.31607	9.93606	9.37987	9.5692		9.88583	9.83157		9.26582	9.74054		9.93606	10.4303		8.70453	8.94197
YKL069W		8.1523	10.2483	10.3793	9.60771	9.93271	9.85375	8.53734	8.6126		9.60771	8.69987		8.1523	10.2483		9.85375	9.47517		9.70522	9.93151
YKL068W-A		11.8623	9.76118	11.8059	10.6761	14.3589	11.4238	9.07044	10.8268		10.6761	9.60366		11.8623	9.76118		11.4238	9.76955		10.2408	10.3542
YKL068W		9.32683	8.21108	10.4211	8.92894	9.1651	9.64545	8.21627	7.5999		8.92894	8.28773		9.32683	8.21108		9.64545	8.27623		9.70306	9.49116
YKL067W		11.801	13.9051	11.591	11.1989	11.5718	11.7378	13.1024	13.4949		11.1989	11.7848		11.801	13.9051		11.7378	13.5148		12.0835	12.4353
YKL066W		9.59641	11.3347	8.91627	9.23277	9.34183	9.07416	10.857	11.3123		9.23277	9.9184		9.59641	11.3347		9.07416	10.8782		10.4947	10.7436
YKL065W-A		6.32828	12.6214	6.70104	7.95524	7.68719	6.3068	9.25537	10.2996		7.95524	8.62705		6.32828	12.6214		6.3068	6.71917		5.3809	6.89398
YKL065C		11.565	12.637	11.13	12.0808	11.6087	11.476	11.9838	12.4375		12.0808	12.2312		11.565	12.637		11.476	13.2864		11.3947	11.436
YKL064W		8.98694	9.05268	9.39755	9.61789	8.68312	8.97226	10.8561	10.7621		9.61789	9.25077		8.98694	9.05268		8.97226	10.1651		8.68532	8.72591
YKL063C		9.37998	9.71723	10.7713	10.3727	10.6973	9.81832	10.0051	10.8044		10.3727	10.035		9.37998	9.71723		9.81832	9.55459		10.422	10.3501
YKL062W		9.61883	8.83372	8.63512	7.62454	10.4873	7.4933	11.3482	11.375		7.62454	7.5638		9.61883	8.83372		7.4933	8.73687		8.78871	9.00813
YKL061W		8.15829	8.59331	9.70335	9.6317	10.0625	7.98367	7.76372	7.99073		9.6317	9.78751		8.15829	8.59331		7.98367	8.17218		8.51235	8.358
YKL060C		17.709	17.2339	17.5454	16.9357	16.2513	18.066	17.7826	18.6644		16.9357	16.5663		17.709	17.2339		18.066	18.0595		17.0972	16.9901
YKL059C		8.51491	8.84376	9.20473	8.7836	8.96966	8.4704	8.6548	9.55214		8.7836	9.46727		8.51491	8.84376		8.4704	8.99685		9.10166	8.83385
YKL058W		12.1514	11.8378	11.8073	11.6155	10.8057	11.2852	10.9224	10.9868		11.6155	11.4381		12.1514	11.8378		11.2852	11.5915		10.8524	11.2162
YKL057C		9.78225	9.49084	9.40572	9.89877	7.99803	9.85199	7.43895	6.49873		9.89877	9.94769		9.78225	9.49084		9.85199	9.20491		9.27812	9.18362
YKL056C		16.7905	14.5424	16.846	15.9037	13.9043	16.9049	14.1371	14.1769		15.9037	14.0391		16.7905	14.5424		16.9049	15.0603		15.2567	15.2868
YKL055C		7.36706	6.63379	7.5323	6.20563	5.60243	7.50751	6.90461	6.45714		6.20563	5.32804		7.36706	6.63379		7.50751	5.91795		6.37313	6.34854
YKL054C		9.96015	9.09105	11.447	9.98506	9.43353	10.3462	10.3325	10.483		9.98506	9.58769		9.96015	9.09105		10.3462	9.49096		11.5106	11.4953
YKL053C-A		10.4809	10.8103	11.7326	10.3515	10.5073	9.88119	11.0863	11.3525		10.3515	10.6718		10.4809	10.8103		9.88119	11.0261		10.5986	10.9582
YKL053W		8.91607	8.72365	4.94471	8.63833	9.3793	8.47066	9.87272	10.2551		8.63833	8.96637		8.91607	8.72365		8.47066	9.44411		9.76412	9.66121
YKL052C		9.00983	9.38331	9.71115	8.98893	9.74835	8.76411	10.1146	10.4436		8.98893	9.15821		9.00983	9.38331		8.76411	9.64692		9.57551	9.62292
YKL051W		9.98464	9.63928	8.20565	11.6952	8.91606	9.59274	10.5936	10.5143		11.6952	11.1578		9.98464	9.63928		9.59274	11.3242		9.75211	9.68022
YKL050C		5.74181	8.34385	6.78592	5.81314	6.29466	5.99287	8.00277	7.75722		5.81314	5.7256		5.74181	8.34385		5.99287	5.90147		6.35488	5.87773
YKL049C		7.2062	8.56039	9.95896	8.38594	9.07199	8.42034	7.52873	7.3669		8.38594	7.84095		7.2062	8.56039		8.42034	8.91595		8.97368	9.08237
YKL048C		7.24592	7.03567	7.86097	6.97602	8.54863	7.51194	6.75459	5.95481		6.97602	6.42849		7.24592	7.03567		7.51194	7.00855		8.05408	8.07693
YKL047W		8.83737	8.28393	9.24071	8.19241	8.67368	8.89525	7.84849	8.14632		8.19241	8.59109		8.83737	8.28393		8.89525	8.66498		8.67437	8.65926
YKL046C		11.0208	10.6073	10.8938	10.5884	10.0916	11.1959	11.0811	11.073		10.5884	10.6001		11.0208	10.6073		11.1959	11.2227		10.9377	10.9703
YKL045W		8.15045	8.66485	9.58264	8.7917	8.86353	8.83799	8.75212	7.54727		8.7917	8.29768		8.15045	8.66485		8.83799	9.28246		9.15056	9.28512
YKL044W		7.74971	8.41378	8.87584	6.28572	8.8071	7.82631	10.3817	9.19648		6.28572	5.46277		7.74971	8.41378		7.82631	8.19201		6.75578	7.23643
YKL043W		9.57007	9.71606	9.97539	8.2819	10.2157	9.65553	12.4148	11.3901		8.2819	6.97		9.57007	9.71606		9.65553	9.96819		9.60988	9.35638
YKL042W		8.28384	7.30074	9.59219	7.63209	8.8221	8.04284	6.93172	7.33062		7.63209	7.49604		8.28384	7.30074		8.04284	8.26239		9.04835	9.13479
YKL041W		8.91904	8.06343	10.3757	9.14256	10.0672	9.3112	9.00031	9.62667		9.14256	9.07555		8.91904	8.06343		9.3112	10.138		9.911	10.0884
YKL040C		10.246	9.69236	10.7873	9.81164	9.57195	10.249	9.32107	9.7669		9.81164	9.75856		10.246	9.69236		10.249	11.832		9.98134	9.90516
YKL039W		10.9919	11.0418	9.88348	10.684	9.35554	10.8523	10.9685	10.8377		10.684	11.1819		10.9919	11.0418		10.8523	11.8075		10.4227	10.3904
YKL038W		8.23491	8.53785	7.76302	7.81475	7.48911	8.18354	10.6897	10.7319		7.81475	8.41967		8.23491	8.53785		8.18354	8.61026		8.06217	8.10958
YKL037W		6.22788	6.55574	5.23216	7.31294	8.32244	6.14515	7.91434	6.91385		7.31294	8.49131		6.22788	6.55574		6.14515	7.24829		6.01747	5.62365
YKL035W		12.3498	12.5198	11.2089	12.0071	11.2653	11.9157	14.2274	14.1103		12.0071	14.4348		12.3498	12.5198		11.9157	14.0274		11.9616	12.2908
YKL036C		10.0595	10.669	4.80107	9.10368	9.3047	9.12089	12.0453	11.8907		9.10368	11.4427		10.0595	10.669		9.12089	11.0926		7.36429	6.94448
YKL034W		9.33549	10.1663	7.14898	9.08372	8.62891	8.94382	10.0682	10.258		9.08372	10.2445		9.33549	10.1663		8.94382	9.98715		8.52623	8.29481
YKL033W-A		11.7255	10.8167	11.8198	11.1467	10.6917	11.6189	10.3193	10.3251		11.1467	10.8793		11.7255	10.8167		11.6189	12.0461		11.0896	11.165
YKL033W		7.39137	7.57278	7.55048	7.90102	6.96268	8.04812	6.7481	7.18286		7.90102	7.73323		7.39137	7.57278		8.04812	7.16179		7.83147	7.67241
YKL032C		9.77444	9.63243	10.5067	9.65743	10.1646	9.45969	10.0054	10.0324		9.65743	8.82132		9.77444	9.63243		9.45969	9.20479		9.90939	9.58218
YKL031W		6.51417	7.84203	5.09445	6.68419	7.53263	5.55139	7.4177	6.81562		6.68419	5.60667		6.51417	7.84203		5.55139	6.67717		5.28919	5.2173
YKL030W		11.3969	9.35149	5.52651	12.0419	11.2076	11.3667	10.5061	9.89192		12.0419	7.91758		11.3969	9.35149		11.3667	7.61121		10.4557	9.90465
YKL029C		11.6309	9.4173	12.0901	12.106	11.3133	11.563	10.5834	9.96045		12.106	7.79693		11.6309	9.4173		11.563	7.09093		10.6107	10.2192
YKL028W		9.03632	8.244	10.621	9.18883	9.99077	9.59686	8.42113	9.27072		9.18883	9.27988		9.03632	8.244		9.59686	9.33971		9.98736	9.97109
YKL027W		9.41531	9.32499	10.319	10.0519	8.75864	9.46303	8.50895	8.03473		10.0519	9.5673		9.41531	9.32499		9.46303	8.32377		9.31048	9.27336
YKL026C		6.39134	11.6578	7.01818	8.41798	9.04667	7.05988	12.3976	13.4086		8.41798	8.00962		6.39134	11.6578		7.05988	9.79723		6.7216	7.41155
YKL025C		9.30667	9.2276	8.34304	8.95942	8.33298	8.83688	9.47086	9.06461		8.95942	9.59897		9.30667	9.2276		8.83688	9.17552		8.85339	8.89044
YKL024C		11.8212	10.8707	12.0175	11.1743	10.7536	11.9127	10.6438	10.8423		11.1743	10.6927		11.8212	10.8707		11.9127	11.4758		11.6523	11.572
YKL023C-A		11.736	10.7775	11.9664	10.6155	10.8342	11.6371	10.0925	10.4875		10.6155	10.1793		11.736	10.7775		11.6371	11.053		10.5322	10.4304
YKL023W		8.30947	8.9845	9.15339	8.41709	10.0185	8.31412	9.23171	10.2224		8.41709	9.28594		8.30947	8.9845		8.31412	9.74457		9.25932	9.40515
YKL022C		7.93279	8.18295	8.4514	8.07322	8.23253	7.99289	8.49209	8.68017		8.07322	8.31609		7.93279	8.18295		7.99289	7.91297		8.44425	8.41353
YKL021C		10.0147	8.31801	11.1874	9.53052	8.87873	10.3871	7.46699	6.84211		9.53052	7.67597		10.0147	8.31801		10.3871	8.57082		10.0092	9.75093
YKL020C		8.60795	8.85952	8.60955	8.91599	8.27734	8.65234	9.64246	9.30465		8.91599	9.71494		8.60795	8.85952		8.65234	8.43971		8.61283	8.43483
YKL019W		10.7456	10.3665	10.6783	10.4091	9.78678	10.5781	10.1502	10.0536		10.4091	10.9732		10.7456	10.3665		10.5781	11.1677		9.84807	10.0525
YKL018C-A		9.78045	9.8803	10.3313	9.17341	10.3352	9.31541	9.10476	9.84663		9.17341	9.484		9.78045	9.8803		9.31541	8.98784		9.70139	9.8633
YKL018W		10.2583	9.37988	9.69827	9.07928	8.44606	9.49916	8.20721	7.13351		9.07928	9.54734		10.2583	9.37988		9.49916	9.08678		8.97892	8.8595
YKL017C		7.20484	7.30083	7.7063	7.87737	7.72714	7.49763	7.83448	8.71724		7.87737	7.79984		7.20484	7.30083		7.49763	8.08645		7.92739	7.9144
YKL016C		11.7645	13.861	11.9926	11.551	11.5945	10.8623	11.8798	12.5907		11.551	11.4656		11.7645	13.861		10.8623	11.8689		11.3918	11.6409
YKL015W		7.95066	7.77177	8.14149	8.77985	8.12355	8.51442	8.37792	8.45197		8.77985	8.54697		7.95066	7.77177		8.51442	8.46868		8.521	8.22569
YKL014C		8.64981	6.50319	8.84082	8.59605	6.27098	9.4181	6.63154	4.90586		8.59605	5.97644		8.64981	6.50319		9.4181	5.02888		8.55979	8.27411
YKL013C		11.832	11.8604	11.8044	11.7202	11.6842	11.5099	11.4808	11.8948		11.7202	11.8686		11.832	11.8604		11.5099	12.9533		11.2985	11.5037
YKL012W		8.38832	8.29956	8.99803	8.26474	9.0007	8.60724	8.54845	9.22617		8.26474	8.55976		8.38832	8.29956		8.60724	9.03848		9.01524	9.03255
YKL011C		7.73503	7.68232	8.41671	8.0493	8.2162	8.36542	8.06462	7.99927		8.0493	8.42593		7.73503	7.68232		8.36542	8.76555		8.59848	8.78557
YKL010C		8.51697	8.7359	8.29189	8.85881	8.1529	8.64945	10.8047	10.6069		8.85881	8.82352		8.51697	8.7359		8.64945	8.8066		8.51041	8.43646
YKL009W		12.098	9.60935	13.4185	11.8057	10.6706	12.1845	9.52825	8.42772		11.8057	8.41352		12.098	9.60935		12.1845	8.14355		11.8257	11.7238
YKL008C		11.7628	10.4409	10.4289	11.2692	10.5996	11.9063	11.87	12.0207		11.2692	10.582		11.7628	10.4409		11.9063	10.0338		10.4832	10.5709
YKL007W		10.388	10.7604	10.6419	10.4184	10.4946	10.4176	9.94019	10.7503		10.4184	11.1089		10.388	10.7604		10.4176	12.0726		10.8476	11.0054
YKL006C-A		9.55586	9.34806	10.6158	9.80302	10.3444	9.56364	8.35829	9.53565		9.80302	9.33721		9.55586	9.34806		9.56364	9.45357		10.0615	9.9008
YKL006W		15.4708	12.875	15.5733	14.8254	12.7748	15.0159	9.93452	10.3608		14.8254	13.0878		15.4708	12.875		15.0159	12.037		14.229	14.2559
YKL005C		8.10497	8.2782	8.57088	8.03669	8.94593	8.74774	10.3274	10.7276		8.03669	8.01429		8.10497	8.2782		8.74774	8.00491		8.92051	8.7734
YKL004W		12.1585	11.0825	11.0975	11.2946	9.63003	12.6136	11.4869	11.6081		11.2946	9.96172		12.1585	11.0825		12.6136	10.1787		10.5015	10.4692
YKL003C		9.68357	9.98199	10.9368	9.72336	10.2802	9.81523	10.1257	10.2878		9.72336	10.1497		9.68357	9.98199		9.81523	10.3594		10.0538	10.2356
YKL002W		9.87649	9.80352	11.1948	10.1795	10.5501	10.0507	10.1111	11.0037		10.1795	10.3167		9.87649	9.80352		10.0507	10.9271		10.6118	10.7611
YKL001C		8.74733	8.24763	12.2028	10.8633	14.0232	9.90194	9.16345	9.50381		10.8633	9.54452		8.74733	8.24763		9.90194	8.6301		9.47961	9.42299
YKR001C		10.9742	10.1437	10.9918	10.484	9.5594	11.1317	10.2125	10.0137		10.484	10.6069		10.9742	10.1437		11.1317	11.3499		11.0115	10.9503
YKR002W		8.95206	9.11839	8.67109	8.87038	8.70549	8.85797	9.35427	9.76752		8.87038	9.52646		8.95206	9.11839		8.85797	9.47571		9.18962	9.12773
YKR003W		9.08025	8.94017	9.53125	8.5529	9.23868	9.33298	8.55023	8.51642		8.5529	9.67397		9.08025	8.94017		9.33298	10.6739		9.62214	9.64159
YKR004C		7.74285	8.38865	7.72307	7.91528	7.98918	7.99671	7.35677	7.89242		7.91528	8.50181		7.74285	8.38865		7.99671	7.28666		8.16831	8.15156
YKR005C		5.50171	6.34707	5.71351	5.60459	5.97457	6.49933	7.74267	7.28795		5.60459	6.78164		5.50171	6.34707		6.49933	6.82277		5.94913	5.70321
YKR006C		9.63892	9.3466	10.6462	9.51753	9.52196	9.9803	9.99575	9.77004		9.51753	9.78374		9.63892	9.3466		9.9803	10.1485		10.1255	10.1621
YKR007W		9.06971	9.2633	9.49353	8.97908	9.9119	9.14978	8.76743	10.0565		8.97908	9.21201		9.06971	9.2633		9.14978	10.4271		9.93549	10.172
YKR008W		8.67535	8.21439	9.37419	8.54366	8.90614	9.06844	8.37916	8.21677		8.54366	8.74837		8.67535	8.21439		9.06844	8.53939		9.45008	9.44519
YKR010C		7.3942	7.08112	8.39387	7.57905	7.69826	7.80467	6.93377	7.16652		7.57905	7.36666		7.3942	7.08112		7.80467	6.28864		8.44084	8.22522
YKR011C		8.33825	8.80386	8.39634	9.91361	9.49283	8.56185	9.29639	9.80867		9.91361	10.8105		8.33825	8.80386		8.56185	10.4575		9.28766	9.4259
YKR013W		12.9298	12.3037	11.707	12.8801	10.7309	12.5713	11.3292	10.9737		12.8801	12.1918		12.9298	12.3037		12.5713	12.2678		11.9831	12.0538
YKR012C		12.0014	11.4822	6.7257	11.5682	9.44055	11.0922	10.1734	9.86848		11.5682	10.8844		12.0014	11.4822		11.0922	10.8871		10.0393	10.3291
YKR014C		10.6699	10.8573	11.292	10.1567	10.9137	10.6439	10.8276	11.3166		10.1567	10.5474		10.6699	10.8573		10.6439	12.6183		11.2703	11.38
YKR015C		7.85982	8.30842	3.41918	8.47084	6.94271	7.79001	7.88911	8.1267		8.47084	8.79544		7.85982	8.30842		7.79001	8.91112		6.84746	6.93604
YKR016W		8.06662	9.36913	9.77671	8.62952	8.51975	8.47959	8.85273	9.10277		8.62952	9.3121		8.06662	9.36913		8.47959	9.42364		9.5165	9.68928
YKR017C		7.79847	8.27875	7.47523	8.02579	8.06188	7.75491	8.64009	8.56845		8.02579	8.11919		7.79847	8.27875		7.75491	8.05718		7.44762	7.55969
YKR018C		9.98471	10.8173	9.70815	9.93445	9.59925	10.3999	11.4029	11.3595		9.93445	9.44961		9.98471	10.8173		10.3999	11.4821		10.0964	10.1491
YKR019C		7.221	7.23541	7.83232	8.02718	8.65682	7.60029	8.1791	8.51916		8.02718	7.35023		7.221	7.23541		7.60029	7.14102		7.5134	7.43159
YKR020W		8.75386	9.20433	9.80498	9.49375	10.0184	9.23573	7.77658	7.98667		9.49375	8.86692		8.75386	9.20433		9.23573	10.0409		9.10668	9.34197
YKR021W		7.8971	8.29479	8.25446	8.36324	8.26851	8.17738	9.83812	9.38591		8.36324	8.61058		7.8971	8.29479		8.17738	8.17809		8.14347	8.01465
YKR022C		8.26052	7.81986	9.5901	8.87104	8.89778	8.98899	7.83084	8.8012		8.87104	8.71182		8.26052	7.81986		8.98899	8.94941		9.19748	9.2165
YKR023W		7.56982	6.59736	8.47053	8.206	8.60998	7.47999	6.6648	7.14842		8.206	8.07172		7.56982	6.59736		7.47999	7.86563		8.52647	8.61056
YKR024C		8.31679	7.20723	10.1079	8.29904	7.89308	8.6391	7.76511	6.60535		8.29904	5.94871		8.31679	7.20723		8.6391	4.20016		9.0755	8.7886
YKR025W		10.1599	8.95048	11.0332	9.35176	10.0213	10.3392	8.65955	8.48419		9.35176	8.47574		10.1599	8.95048		10.3392	8.55878		10.0859	10.122
YKR026C		10.7309	9.36448	10.9318	10.3786	9.2103	10.7098	7.58111	7.26094		10.3786	9.66931		10.7309	9.36448		10.7098	9.99415		10.2607	10.3432
YKR027W		8.70477	7.96858	8.28321	8.38537	8.38534	8.69449	6.38686	5.81243		8.38537	8.76514		8.70477	7.96858		8.69449	8.73051		8.28528	8.24561
YKR028W		9.71286	8.70814	9.35693	9.6291	9.13019	9.75302	8.4191	8.04889		9.6291	9.55719		9.71286	8.70814		9.75302	9.26936		9.42339	9.28088
YKR029C		6.92408	7.12312	7.83064	7.32393	8.3947	7.24051	6.95956	7.50517		7.32393	7.9108		6.92408	7.12312		7.24051	7.70942		8.29316	8.52612
YKR030W		10.6696	9.91717	9.40769	9.74422	9.70879	9.36683	8.93493	9.07404		9.74422	10.1396		10.6696	9.91717		9.36683	9.7405		9.57447	9.73332
YKR032W		4.74749	4.08431	4.54425	1.40605	2.91337	1.68861	4.49005	5.31681		1.40605	1.75302		4.74749	4.08431		1.68861	1.39526		2.72411	2.65222
YKR035C		9.3622	9.40525	6.21276	9.47422	10.4443	9.58157	9.45907	10.5225		9.47422	9.63169		9.3622	9.40525		9.58157	10.3218		10.4855	10.5319
YKR036C		8.43113	7.71579	8.50721	7.94925	8.87415	8.76821	7.2771	7.67087		7.94925	7.90564		8.43113	7.71579		8.76821	7.95678		8.6857	8.71893
YKR037C		7.84637	8.55987	9.18213	8.67902	8.50103	8.56602	7.88561	7.73535		8.67902	8.82133		7.84637	8.55987		8.56602	8.68595		8.53065	8.76022
YKR038C		10.0612	9.76605	10.8488	10.1489	10.2017	10.457	9.61747	9.96848		10.1489	10.0174		10.0612	9.76605		10.457	10.342		9.93668	10.0308
YKR039W		8.72378	11.5777	11.1903	7.10345	9.10694	7.41975	12.6299	8.14504		7.10345	7.98948		8.72378	11.5777		7.41975	8.44436		7.66723	7.23665
YKR041W		5.91641	5.67517	6.8924	6.73371	6.7631	5.9519	6.53043	5.29655		6.73371	5.81765		5.91641	5.67517		5.9519	5.34237		6.42617	6.19078
YKR040C		5.9379	4.55824	4.44218	6.10302	6.79378	6.14228	5.68645	5.58627		6.10302	5.04458		5.9379	4.55824		6.14228	5.59062		5.89848	5.71111
YKR042W		15.6003	13.7832	14.0403	14.3766	14.6471	14.656	15.0192	14.5424		14.3766	14.3628		15.6003	13.7832		14.656	14.2592		13.9295	13.9306
YKR043C		12.5238	10.5595	13.1279	11.5896	11.2181	12.457	9.43876	9.65391		11.5896	10.4155		12.5238	10.5595		12.457	11.0514		11.7906	11.6694
YKR044W		9.66164	9.27914	8.88772	9.49141	8.85603	9.86936	8.43963	8.14696		9.49141	9.23318		9.66164	9.27914		9.86936	8.25547		8.98082	8.96246
YKR045C		9.2372	8.74485	9.12581	8.50061	8.36078	8.88601	9.00866	8.32219		8.50061	8.90756		9.2372	8.74485		8.88601	8.09078		8.42435	8.56476
YKR046C		11.8375	13.4063	11.4906	13.0004	10.612	11.6114	13.375	12.9769		13.0004	13.342		11.8375	13.4063		11.6114	12.045		10.5465	10.3855
YKR047W		11.4793	10.7406	8.0952	11.1132	10.897	11.1789	11.4685	11.7705		11.1132	10.9921		11.4793	10.7406		11.1789	11.6232		11.5029	11.5043
YKR048C		11.5227	11.3306	12.413	10.9492	11.3511	11.6579	11.9821	12.1156		10.9492	10.8416		11.5227	11.3306		11.6579	12.1775		11.3918	11.3904
YKR049C		8.90683	12.7047	9.67752	9.35112	10.3284	9.41363	13.184	13.2075		9.35112	10.302		8.90683	12.7047		9.41363	11.329		9.19669	9.40657
YKR050W		8.93643	9.25548	8.07329	8.77281	7.45228	8.95839	9.31152	8.76255		8.77281	8.64306		8.93643	9.25548		8.95839	8.25662		7.99237	7.6277
YKR051W		9.61782	9.34782	8.0359	8.83365	8.95558	9.34139	8.99068	9.11095		8.83365	9.50577		9.61782	9.34782		9.34139	9.55271		8.58691	8.56921
YKR052C		8.60474	9.16777	8.35292	8.40096	8.65091	8.88392	10.4765	10.0598		8.40096	8.82193		8.60474	9.16777		8.88392	11.7075		8.86125	8.74154
YKR053C		8.95966	8.32115	6.41864	7.9056	10.2675	8.92027	9.40464	9.61177		7.9056	8.24705		8.95966	8.32115		8.92027	10.0899		8.35484	8.31612
YKR054C		6.71094	6.35494	6.28355	6.42113	5.91949	7.28727	8.09003	7.95947		6.42113	5.85562		6.71094	6.35494		7.28727	6.02446		6.90203	6.83241
YKR055W		8.64086	8.55509	8.7415	8.1004	8.62886	8.42671	9.74466	9.24333		8.1004	8.82691		8.64086	8.55509		8.42671	8.25039		8.60021	8.65956
YKR056W		9.78425	8.70128	10.2494	9.53223	9.06304	10.0784	8.68327	7.41353		9.53223	5.87779		9.78425	8.70128		10.0784	6.8062		9.49001	9.26532
YKR057W		15.2012	12.9701	15.7104	13.9264	12.7422	15.0253	9.24795	9.04436		13.9264	12.3923		15.2012	12.9701		15.0253	11.9413		13.5036	13.5696
YKR058W		7.74516	9.455	6.63855	7.46219	9.38559	6.88046	11.2167	11.3504		7.46219	8.99688		7.74516	9.455		6.88046	8.68587		7.28701	7.50673
YKR059W		14.7763	12.6979	14.1837	14.1336	12.3174	14.6989	12.2515	11.8918		14.1336	12.7721		14.7763	12.6979		14.6989	12.6214		13.8832	12.4229
YKR060W		8.99941	7.67994	10.1241	8.93885	8.59197	9.4899	6.29741	6.77863		8.93885	7.28284		8.99941	7.67994		9.4899	7.09191		9.57983	9.34592
YKR061W		8.62855	7.23804	8.05198	10.6391	8.45679	8.82546	10.0458	10.1472		10.6391	8.89747		8.62855	7.23804		8.82546	10.0691		8.2132	8.41311
YKR062W		9.6814	9.56517	9.9652	9.13121	9.54501	9.70508	9.78682	10.0404		9.13121	9.53019		9.6814	9.56517		9.70508	10.4863		9.88305	9.72258
YKR063C		8.25301	7.73939	8.6479	8.40209	8.70983	8.86837	8.0243	8.28546		8.40209	7.92748		8.25301	7.73939		8.86837	8.27266		8.88273	8.84783
YKR064W		7.55822	7.78795	7.63125	7.89191	8.66504	8.08485	7.83023	8.05002		7.89191	8.04404		7.55822	7.78795		8.08485	8.04918		8.2701	8.12113
YKR065C		11.8458	12.3315	10.7676	10.9753	10.2486	11.334	11.0641	10.7504		10.9753	11.2352		11.8458	12.3315		11.334	11.5479		10.9035	10.744
YKR066C		11.5234	13.0229	10.6054	10.9458	11.327	11.2354	13.8901	13.5307		10.9458	12.0476		11.5234	13.0229		11.2354	15.1218		11.2654	11.3817
YKR067W		8.03472	11.1368	7.40908	8.66129	8.33231	8.35684	11.0326	9.50871		8.66129	10.4281		8.03472	11.1368		8.35684	11.1863		8.63616	8.78344
YKR068C		10.8283	10.6584	11.115	10.3643	11.0547	10.6445	9.44569	10.1096		10.3643	10.7556		10.8283	10.6584		10.6445	10.7913		10.1503	10.3237
YKR069W		6.87637	7.42998	8.56396	7.97341	11.9169	7.66167	8.29983	8.72877		7.97341	8.08373		6.87637	7.42998		7.66167	8.2019		7.66144	7.46402
YKR070W		9.81612	10.0641	9.46248	9.36671	9.65824	9.99449	9.40848	9.45192		9.36671	9.49493		9.81612	10.0641		9.99449	10.4789		9.66986	9.84936
YKR071C		9.9648	9.33647	12.143	10.9309	10.0986	11.2278	11.261	11.2963		10.9309	10.2626		9.9648	9.33647		11.2278	12.7248		10.503	10.4594
YKR072C		9.65859	9.03949	9.91621	9.74402	9.11457	9.30102	9.75963	10.3016		9.74402	9.40486		9.65859	9.03949		9.30102	8.70084		10.027	9.83886
YKR073C		5.79627	7.23129	5.99671	5.87068	5.88144	5.66236	6.3373	7.0058		5.87068	4.38877		5.79627	7.23129		5.66236	5.31245		4.43385	2.777
YKR074W		10.5131	10.8533	11.4436	10.2443	10.4872	10.9293	10.3892	10.9963		10.2443	9.33161		10.5131	10.8533		10.9293	11.6632		10.4598	10.7838
YKR075W-A		8.06808	10.2472	5.41864	8.22836	9.56654	8.20554	9.5198	8.47332		8.22836	8.69879		8.06808	10.2472		8.20554	5.37824		8.26843	8.11408
YKR075C		8.17784	9.94026	7.90549	8.09668	9.4263	8.21633	9.80993	8.9541		8.09668	8.4951		8.17784	9.94026		8.21633	6.87077		8.50348	8.43159
YKR076W		6.66342	11.377	7.10289	6.08486	9.16805	7.2688	11.2401	10.7732		6.08486	7.11521		6.66342	11.377		7.2688	13.6545		8.4214	8.3669
YKR077W		8.49457	9.60689	8.76836	8.20682	9.02387	8.1111	7.46909	6.96384		8.20682	7.9707		8.49457	9.60689		8.1111	8.54114		8.71192	8.86242
YKR078W		7.37535	6.71075	7.62423	7.50297	7.92621	7.28155	6.94028	8.14269		7.50297	7.41206		7.37535	6.71075		7.28155	6.9021		7.96546	7.83941
YKR079C		8.87922	7.32487	9.27502	8.85226	7.78291	9.55286	6.69471	5.36916		8.85226	7.0646		8.87922	7.32487		9.55286	6.34025		8.82034	8.68246
YKR080W		12.0486	9.40166	9.60695	12.2811	11.4746	10.8335	9.69165	10.3649		12.2811	10.7292		12.0486	9.40166		10.8335	8.22375		10.686	10.3819
YKR081C		10.5555	8.42378	11.8395	10.1787	9.41318	10.9449	8.50629	7.89128		10.1787	6.43485		10.5555	8.42378		10.9449	6.09065		10.9231	10.7391
YKR082W		8.63641	7.84459	8.81479	8.69651	7.76921	9.0953	7.92976	7.29184		8.69651	8.14316		8.63641	7.84459		9.0953	7.65657		9.10119	9.12895
YKR083C		7.90683	7.02717	9.58278	8.24896	8.88489	8.25668	6.01268	7.36707		8.24896	7.71708		7.90683	7.02717		8.25668	7.39566		9.26573	9.33502
YKR084C		9.41695	8.90058	9.7163	9.14077	9.01215	9.74358	9.04143	9.28373		9.14077	9.07767		9.41695	8.90058		9.74358	10.3213		9.79649	9.72256
YKR085C		9.30629	9.00799	10.819	9.34321	9.70058	9.77505	9.07609	9.21262		9.34321	9.269		9.30629	9.00799		9.77505	9.97682		10.0146	10.1564
YKR086W		7.10299	7.43241	8	7.37951	7.67784	8.02382	7.1753	7.57124		7.37951	6.97103		7.10299	7.43241		8.02382	6.85077		8.07501	8.04484
YKR087C		9.28023	9.61576	8.79735	9.20923	7.8244	9.23434	8.63592	7.95398		9.20923	9.51175		9.28023	9.61576		9.23434	9.74189		8.78508	8.91673
YKR088C		10.9503	10.4923	9.51103	10.5828	9.37409	10.9184	9.41813	9.81151		10.5828	10.2697		10.9503	10.4923		10.9184	11.4701		9.85836	9.94731
YKR089C		9.03773	9.6569	8.52128	8.82669	8.36475	9.05368	10.0682	9.90019		8.82669	9.83829		9.03773	9.6569		9.05368	9.44664		9.45949	9.53422
YKR090W		8.35311	7.55284	8.55103	8.75802	8.24681	8.49141	6.93513	7.10243		8.75802	8.77978		8.35311	7.55284		8.49141	8.18166		8.76503	8.7394
YKR091W		7.73897	9.80954	8.99113	11.0993	11.0004	7.92361	9.35747	8.56996		11.0993	11.2354		7.73897	9.80954		7.92361	10.1973		7.57273	8.12469
YKR092C		11.5991	9.40937	11.9839	10.6024	10.2976	11.8422	8.78965	7.03055		10.6024	6.76417		11.5991	9.40937		11.8422	5.88274		11.0927	10.9304
YKR093W		11.2485	9.98421	10.7005	9.13163	7.27826	8.85595	10.5393	7.65542		9.13163	9.20087		11.2485	9.98421		8.85595	7.45601		9.74691	10.0481
YKR094C		14.6497	12.3326	15.2277	14.0061	12.9983	14.6941	9.98604	10.4032		14.0061	12.5266		14.6497	12.3326		14.6941	12.2447		14.2186	14.034
YKR095W		7.48914	6.78313	9.58042	7.71497	7.76465	8.87568	7.9723	8.69622		7.71497	7.07965		7.48914	6.78313		8.87568	7.95503		9.34991	9.24308
YKR095W-A		9.6061	8.88725	11.1296	8.54007	9.62954	9.46042	6.78644	7.17217		8.54007	8.46727		9.6061	8.88725		9.46042	8.77295		9.57765	9.60444
YKR096W		7.37434	8.52334	7.96019	7.58104	7.95581	7.54453	9.39322	9.29432		7.58104	8.17055		7.37434	8.52334		7.54453	8.09471		8.24287	8.12735
YKR097W		4.88789	13.6341	6.06899	6.83718	7.32363	6.20871	9.05714	7.50412		6.83718	5.67988		4.88789	13.6341		6.20871	7.67563		5.18751	5.45957
YKR098C		7.05551	7.72645	6.75355	6.77966	7.88716	7.25796	8.55566	8.78299		6.77966	8.55245		7.05551	7.72645		7.25796	7.88925		7.70243	7.49823
YKR099W		7.82245	6.94109	8.89926	7.75073	8.77143	8.53421	6.59062	5.55837		7.75073	6.41173		7.82245	6.94109		8.53421	6.31414		8.52493	8.32481
YKR100C		9.6717	9.28688	10.0891	10.1389	9.35822	9.68603	10.3974	10.8888		10.1389	10.0724		9.6717	9.28688		9.68603	9.62107		9.55757	9.65376
YKR101W		6.01505	7.31952	7.31693	7.03874	8.38464	6.74582	8.00882	8.55135		7.03874	7.5028		6.01505	7.31952		6.74582	7.58065		7.38475	7.68668
YKR102W		6.5286	7.34822	5.61216	10.2736	5.98878	6.73547	7.5717	6.32603		10.2736	8.99379		6.5286	7.34822		6.73547	6.20597		5.58789	5.08106
YKR103W		5.87121	6.31258	6.16042	6.55706	5.83697	6.59746	6.76873	6.62686		6.55706	6.47317		5.87121	6.31258		6.59746	6.12388		6.39416	6.04834
YKR104W		7.6769	7.26587	6.6484	7.51284	6.53324	7.02411	7.05768	7.05964		7.51284	7.43719		7.6769	7.26587		7.02411	6.34251		6.68581	6.61392
YLL063C		7.67899	7.92908	7.41103	7.35521	8.43777	7.49482	7.76647	6.88651		7.35521	8.066		7.67899	7.92908		7.49482	7.45329		7.371	7.19654
YLL062C		6.8896	7.40993	9.00829	7.85548	9.45753	7.96525	7.82193	7.64759		7.85548	7.20689		6.8896	7.40993		7.96525	6.52879		7.78522	7.81803
YLL061W		8.50378	9.05074	8.69028	9.56619	9.32297	10.03	8.73329	8.71336		9.56619	7.47548		8.50378	9.05074		10.03	7.2491		7.97039	7.90607
YLL060C		7.51411	9.28489	8.59178	7.96761	9.57373	7.99287	10.4477	10.5689		7.96761	8.25273		7.51411	9.28489		7.99287	14.1914		7.98678	8.1559
YLL059C		4.63685	6.69238	6.3021	5.82794	8.08332	6.01517	8.02581	8.05164		5.82794	6.69088		4.63685	6.69238		6.01517	9.52546		5.3594	5.28751
YLL058W		8.6046	9.0928	7.89246	8.73582	9.79361	8.24223	9.79037	9.61602		8.73582	9.21422		8.6046	9.0928		8.24223	10.1193		8.23421	8.16872
YLL057C		7.66559	7.87044	5.73168	7.85236	7.51289	8.01241	7.33022	7.04941		7.85236	7.51649		7.66559	7.87044		8.01241	8.39181		6.42392	6.52891
YLL056C		7.3987	8.74275	7.07718	7.82111	8.76294	7.84373	11.7195	11.3267		7.82111	8.22055		7.3987	8.74275		7.84373	11.2401		7.87415	7.70386
YLL055W		8.29508	8.52198	7.36292	8.60223	9.95336	8.13587	10.7125	9.5105		8.60223	8.78412		8.29508	8.52198		8.13587	10.7485		7.68482	7.59247
YLL054C		7.67504	6.88816	7.66358	8.19199	6.7487	7.87528	7.66311	7.47415		8.19199	7.67887		7.67504	6.88816		7.87528	8.03176		7.61745	7.48387
YLL053C		10.8247	7.97429	9.22671	14.1653	8.97598	8.78035	9.73699	8.85506		14.1653	10.6368		10.8247	7.97429		8.78035	8.41767		7.82482	7.30547
YLL052C		10.8475	8.30167	9.28884	13.9337	8.85507	8.7558	9.81678	8.90778		13.9337	10.443		10.8475	8.30167		8.7558	8.56745		7.53146	6.74908
YLL051C		9.53638	9.93854	8.60516	10.852	9.25165	10.1723	8.75445	8.99979		10.852	9.58041		9.53638	9.93854		10.1723	11.4032		9.23154	8.91723
YLL050C		14.1269	13.8005	13.6827	13.0619	13.371	13.5982	12.5024	12.8344		13.0619	13.2		14.1269	13.8005		13.5982	13.712		13.598	13.6598
YLL049W		9.98797	10.223	9.67674	9.64525	9.95453	10.0738	9.70491	10.7304		9.64525	9.83132		9.98797	10.223		10.0738	10.4921		9.19654	9.3395
YLL047W		3.96173	5.85423	4.8345	1.12029	7.00814	4.01897	5.07877	5.39363		1.12029	2.88231		3.96173	5.85423		4.01897	4.45775		2.43835	4.10343
YLL045C		15.6701	12.9829	16.111	15.3181	13.7503	15.8024	10.6499	10.6796		15.3181	13.4594		15.6701	12.9829		15.8024	13.0568		15.2016	15.2946
YLL043W		10.5294	10.1049	9.97855	9.99231	9.57233	10.2187	9.63859	9.86359		9.99231	10.261		10.5294	10.1049		10.2187	9.49713		10.0588	9.89698
YLL042C		7.34157	7.1432	7.31066	7.62279	7.36651	6.95516	7.05991	8.11679		7.62279	7.25817		7.34157	7.1432		6.95516	6.52742		6.44597	6.82659
YLL041C		11.0694	14.6387	10.0635	10.4599	10.541	9.31809	13.0547	13.0185		10.4599	11.6689		11.0694	14.6387		9.31809	10.2295		9.54089	9.79762
YLL040C		6.89421	7.42758	7.50531	6.83796	6.67758	7.68332	10.1464	9.92623		6.83796	7.73767		6.89421	7.42758		7.68332	8.19529		8.07349	7.95355
YLL039C		10.0896	13.0205	11.9259	11.3129	12.9274	10.7779	13.9543	13.5719		11.3129	12.4503		10.0896	13.0205		10.7779	14.181		11.3156	11.4178
YLL038C		8.79876	7.8509	9.36078	8.71877	8.63045	9.17492	8.21203	7.963		8.71877	8.46921		8.79876	7.8509		9.17492	9.21256		8.55502	8.2367
YLL037W		8.58746	8.07628	5.13829	8.94859	8.36492	8.72586	8.33109	8.31184		8.94859	8.38947		8.58746	8.07628		8.72586	8.37036		9.18663	8.98921
YLL036C		9.0785	8.52385	9.72057	9.21112	8.99677	9.17458	8.59042	8.24078		9.21112	8.81642		9.0785	8.52385		9.17458	8.69247		9.24243	9.21714
YLL035W		9.16309	7.61868	9.07193	9.00961	8.17918	9.43914	7.13982	5.5615		9.00961	7.27321		9.16309	7.61868		9.43914	6.73091		8.72309	8.30516
YLL034C		9.16375	7.17145	10.1563	8.56431	7.803	9.85968	7.03265	4.62142		8.56431	5.74893		9.16375	7.17145		9.85968	5.82062		9.47387	9.14528
YLL033W		7.98872	7.82852	8.26978	8.38489	8.19665	8.65752	6.76759	6.69388		8.38489	8.49612		7.98872	7.82852		8.65752	9.2268		7.88835	7.9705
YLL032C		7.50926	7.5528	7.74167	7.53227	6.9689	7.90164	7.13879	7.4879		7.53227	7.43191		7.50926	7.5528		7.90164	7.59746		8.15302	7.97822
YLL028W		10.3777	8.46253	10.138	9.25511	8.71724	8.80472	13.0747	12.5298		9.25511	9.08009		10.3777	8.46253		8.80472	8.45582		9.24176	9.34639
YLL027W		10.4869	10.4218	10.2857	10.2162	10.8771	9.56701	10.8102	10.6941		10.2162	10.4368		10.4869	10.4218		9.56701	9.3106		9.75324	9.71685
YLL026W		9.25898	12.7014	9.72432	13.2174	10.6668	9.61941	13.5412	13.8348		13.2174	12.856		9.25898	12.7014		9.61941	13.6498		11.4382	11.6002
YLL025W		5.36443	7.93218	7.17443	6.96187	9.65222	6.96518	9.71425	8.52471		6.96187	7.8823		5.36443	7.93218		6.96518	7.96713		6.71204	7.41066
YLL024C		14.5315	13.6083	14.7936	15.1549	12.3029	14.9785	15.5426	14.9575		15.1549	15.5401		14.5315	13.6083		14.9785	14.9343		13.6339	13.4526
YLL023C		11.288	12.973	10.0081	10.991	9.83497	10.7945	12.6543	12.5238		10.991	12.7737		11.288	12.973		10.7945	12.7707		10.3066	10.3948
YLL022C		9.36063	9.46972	10.2366	8.98932	9.05995	9.44192	8.35779	8.46414		8.98932	8.39968		9.36063	9.46972		9.44192	8.8757		9.18773	9.38134
YLL021W		7.87749	7.02457	9.44513	8.03731	8.32578	8.66009	6.90481	7.2168		8.03731	7.6357		7.87749	7.02457		8.66009	7.25687		9.39813	9.24655
YLL020C		8.79585	11.005	8.33791	9.12029	10.1043	8.41762	11.5091	11.3921		9.12029	10.2364		8.79585	11.005		8.41762	9.25899		8.31025	7.23836
YLL019W-A		8.53698	11.6579	6.3803	9.31584	10.2508	8.31128	11.715	11.3356		9.31584	10.528		8.53698	11.6579		8.31128	9.64345		8.80608	9.51847
YLL019C		8.4822	10.9279	8.34543	8.99423	10.003	8.31872	11.6503	11.22		8.99423	10		8.4822	10.9279		8.31872	9.28956		8.12358	8.20531
YLL018C-A		10.622	11.3512	10.0488	10.0778	9.10077	9.27812	10.2754	9.85174		10.0778	9.63665		10.622	11.3512		9.27812	10.1181		9.38726	8.796
YLL018C		12.3657	11.5739	12.5902	11.9227	11.2842	12.4577	11.1118	11.5143		11.9227	11.6198		12.3657	11.5739		12.4577	11.9972		12.2549	12.1658
YLL015W		8.84247	9.36946	7.77562	9.24258	7.29946	9.33245	9.53606	8.87553		9.24258	9.05818		8.84247	9.36946		9.33245	9.45074		8.39242	8.28835
YLL014W		11.9851	11.2097	12.2134	11.3041	11.1744	11.9423	9.87352	10.535		11.3041	10.8815		11.9851	11.2097		11.9423	11.4336		11.2484	11.1597
YLL013C		7.221	7.5375	8.05031	6.40502	5.99986	8.10139	9.93139	9.03293		6.40502	7.33337		7.221	7.5375		8.10139	7.42137		8.16655	8.21689
YLL012W		9.90433	8.55158	8.8615	10.4158	9.18875	9.43625	10.9159	9.84996		10.4158	10.0303		9.90433	8.55158		9.43625	7.01328		8.5076	8.42502
YLL011W		9.68412	7.88906	10.9653	9.20949	9.12371	9.8011	7.36218	6.04195		9.20949	7.72539		9.68412	7.88906		9.8011	5.85236		10.0002	9.76422
YLL010C		9.63557	9.55102	8.92367	7.96379	9.31392	9.35445	8.3536	7.68681		7.96379	8.307		9.63557	9.55102		9.35445	9.37039		9.41494	9.38803
YLL009C		9.15438	10.1724	11.4561	9.84588	11.0495	9.64879	11.2483	11.9786		9.84588	10.2922		9.15438	10.1724		9.64879	10.2311		10.4945	11.0545
YLL008W		9.85455	7.76394	11.6148	9.41163	8.86125	10.3107	8.38701	8.37456		9.41163	4.86496		9.85455	7.76394		10.3107	5.34841		10.4654	10.1653
YLL007C		7.02061	7.13582	7.50676	7.6205	6.98146	7.28629	7.31677	7.01425		7.6205	8.10098		7.02061	7.13582		7.28629	7.1624		7.4008	6.94644
YLL006W-A		5.00309	5.49191	5.37585	4.40758	4.70305	4.39553	5.05862	5.66299		4.40758	4.99966		5.00309	5.49191		4.39553	3.48618		3.55571	3.48382
YLL006W		8.62112	9.19047	8.11449	8.73425	8.0001	9.02021	9.89107	9.79053		8.73425	8.78536		8.62112	9.19047		9.02021	9.60451		8.2273	8.15541
YLL003W		7.60396	7.42751	8.22345	7.83484	8.00031	8.00157	7.61781	8.18197		7.83484	7.65864		7.60396	7.42751		8.00157	7.70899		7.96523	7.96216
YLL002W		8.11037	6.9855	8.00552	8.38085	7.7792	7.97861	5.13325	5.06693		8.38085	8.67115		8.11037	6.9855		7.97861	8.25547		8.06679	8.22271
YLL001W		8.60945	9.70174	8.6811	8.88516	8.57951	8.58242	9.5371	9.06279		8.88516	9.59847		8.60945	9.70174		8.58242	9.46795		9.00444	9.00226
YLR001C		8.02441	9.12067	6.83054	7.84888	8.46569	8.27311	10.4033	10.2555		7.84888	9.25256		8.02441	9.12067		8.27311	9.08017		8.407	8.48635
YLR002C		9.31782	7.49315	10.2394	9.15093	8.05982	9.7962	7.33705	6.56976		9.15093	6.34962		9.31782	7.49315		9.7962	6.21203		9.7467	9.60286
YLR003C		9.6418	7.40919	11.0951	9.82149	9.00213	10.0899	7.6869	8.158		9.82149	7.46727		9.6418	7.40919		10.0899	6.21003		9.87221	9.84039
YLR004C		6.71113	7.71732	5.50104	6.73792	12.9196	6.89125	9.75207	8.5566		6.73792	6.73153		6.71113	7.71732		6.89125	6.69902		6.66546	6.48504
YLR005W		9.00413	9.57937	9.70678	9.05971	10.1487	9.00183	9.79273	10.1558		9.05971	9.32345		9.00413	9.57937		9.00183	8.93295		9.36066	9.24792
YLR006C		8.2689	8.00365	8.4366	10.4396	8.77436	7.95925	9.42582	9.32715		10.4396	9.54538		8.2689	8.00365		7.95925	8.63208		8.47892	8.26471
YLR007W		9.13227	9.53119	9.43977	9.40053	9.64388	9.65543	9.59777	10.6859		9.40053	9.21362		9.13227	9.53119		9.65543	9.1072		8.83761	9.08765
YLR008C		10.5464	9.80419	11.711	10.2193	9.5047	11.1395	9.09497	8.93135		10.2193	9.72341		10.5464	9.80419		11.1395	10.2404		10.9208	10.8523
YLR009W		11.4815	9.24342	12.9876	11.3709	10.7503	12.0463	9.3418	7.91076		11.3709	7.7343		11.4815	9.24342		12.0463	7.57897		11.6761	11.4856
YLR010C		7.4686	8.68749	7.8607	8.76092	8.85398	7.65557	8.2771	9.00653		8.76092	8.20603		7.4686	8.68749		7.65557	7.77168		7.61699	7.23194
YLR011W		8.34998	8.47032	9.43994	8.56875	8.59238	7.99633	7.67823	8.48423		8.56875	8.91939		8.34998	8.47032		7.99633	9.62528		8.07148	8.40924
YLR012C		4.24188	5.3067	4.61464	0.324435	3.71151	1.86034	5.29741	7.30777		0.324435	2.23845		4.24188	5.3067		1.86034	5.61008		3.9465	2.72261
YLR013W		4.31198	4.22481	4.68475	1.97055	3.6171	2.07178	6.27694	6.71781		1.97055	-0.41945		4.31198	4.22481		2.07178	2.21908		2.28861	2.21672
YLR014C		7.28956	6.74229	7.93066	7.63614	7.03766	8.10115	7.29741	7.38207		7.63614	6.32966		7.28956	6.74229		8.10115	5.86606		7.45508	7.1643
YLR015W		7.61809	7.5367	9.28237	7.95108	8.05814	8.80147	8.09167	8.59606		7.95108	6.99734		7.61809	7.5367		8.80147	7.70652		8.70012	8.48384
YLR016C		9.48724	9.53481	9.64031	10.122	9.88244	9.67013	9.7822	10.1644		10.122	9.32047		9.48724	9.53481		9.67013	9.9616		9.1588	9.10577
YLR017W		11.3087	10.1757	11.3956	10.5191	9.63869	11.3813	10.0639	9.56092		10.5191	8.96725		11.3087	10.1757		11.3813	9.03348		10.4818	10.4574
YLR018C		9.75699	9.09004	10.0392	8.918	9.5147	10.2166	8.66198	8.5836		8.918	9.5346		9.75699	9.09004		10.2166	9.35002		9.89681	9.89698
YLR019W		11.0706	10.1357	9.6389	9.49978	10.334	10.5745	11.1369	11.016		9.49978	9.96763		11.0706	10.1357		10.5745	10.5268		9.82101	9.75836
YLR020C		9.34805	7.81697	9.3968	9.28456	9.33425	9.7843	8.07267	8.80777		9.28456	8.86683		9.34805	7.81697		9.7843	8.61404		9.5049	9.59407
YLR021W		9.18511	8.49711	10.2278	9.69453	9.58184	9.52783	7.68207	8.17479		9.69453	9.37914		9.18511	8.49711		9.52783	9.80416		9.49082	9.67766
YLR022C		9.71314	8.06147	10.9958	10.2395	9.6888	10.2494	7.72461	7.92459		10.2395	9.65475		9.71314	8.06147		10.2494	9.59338		10.2912	10.2264
YLR023C		9.94543	10.6528	8.51919	9.46485	10.0363	9.59392	9.94867	9.51994		9.46485	10.2145		9.94543	10.6528		9.59392	9.82588		9.11022	9.11049
YLR024C		6.04821	6.55123	6.63273	7.26597	5.90884	7.22956	8.15865	7.82627		7.26597	7.0651		6.04821	6.55123		7.22956	7.41422		7.1201	7.15909
YLR025W		9.49842	9.87078	11.396	9.60508	10.9542	10.2166	10.1679	11.0387		9.60508	9.91851		9.49842	9.87078		10.2166	11.4137		10.7273	10.8582
YLR026C		9.24606	8.08857	10.0243	8.79413	9.44345	8.97512	8.28786	7.985		8.79413	9.05176		9.24606	8.08857		8.97512	9.43729		9.77664	9.7808
YLR028C		11.511	11.7342	11.4569	11.2789	11.1743	11.3338	11.8377	11.279		11.2789	11.2122		11.511	11.7342		11.3338	11.891		11.3625	11.2668
YLR029C		15.964	13.9256	16.9713	14.9517	14.4118	16.3271	10.5509	9.55265		14.9517	13.1034		15.964	13.9256		16.3271	14.7098		15.4193	15.4389
YLR030W		8.55862	8.57274	5.45107	8.17393	8.38405	8.38871	7.24737	6.92078		8.17393	7.60609		8.55862	8.57274		8.38871	8.17673		7.84974	7.6639
YLR031W		7.36828	8.32484	5.44857	7.41889	8.07582	8.10784	5.24237	6.13624		7.41889	7.26615		7.36828	8.32484		8.10784	7.93198		7.53531	7.69949
YLR032W		7.38134	7.26597	7.99069	7.01546	7.28685	7.55521	7.16513	7.44715		7.01546	6.89336		7.38134	7.26597		7.55521	7.2342		7.99425	7.89223
YLR033W		8.79066	8.11391	9.98746	9.00774	9.20823	8.84505	7.52144	8.20639		9.00774	8.89088		8.79066	8.11391		8.84505	9.08858		9.44566	9.55248
YLR034C		10.572	11.1909	9.44352	10.3266	10.6161	10.9088	10.9856	10.8819		10.3266	10.9885		10.572	11.1909		10.9088	11.7443		10.1528	10.0242
YLR035C		7.13753	7.9428	7.32425	7.41713	7.81546	7.78946	8.14506	8.46551		7.41713	7.86667		7.13753	7.9428		7.78946	8.1411		7.79127	7.755
YLR036C		8.97882	9.40682	8.82491	8.95764	9.20162	9.10777	6.9913	7.15119		8.95764	9.16698		8.97882	9.40682		9.10777	8.76328		8.82482	8.64046
YLR037C		7.73291	9.13323	7.50936	8.03715	8.54851	7.66063	8.54837	8.16481		8.03715	8.93611		7.73291	9.13323		7.66063	8.37118		6.71204	6.80061
YLR038C		11.3517	13.7386	12.3602	12.1584	9.90375	10.6255	11.8977	12.7413		12.1584	12.2004		11.3517	13.7386		10.6255	11.1347		10.7216	10.9075
YLR039C		7.43339	7.77469	7.64347	7.93872	7.32603	7.84023	6.9223	6.48628		7.93872	7.9293		7.43339	7.77469		7.84023	8.01635		8.29279	8.3796
YLR041W		9.57977	8.90525	6.99096	9.31546	10.0934	9.25677	6.04779	6.34022		9.31546	9.55023		9.57977	8.90525		9.25677	8.79444		7.60378	7.86446
YLR040C		9.57352	9.14344	8.86484	9.92122	10.7742	9.82656	6.93484	7.05378		9.92122	10.2062		9.57352	9.14344		9.82656	9.46309		8.11642	8.41893
YLR042C		10.0084	9.04589	8.25381	12.2399	9.5944	9.58634	6.23368	6.13178		12.2399	14.6222		10.0084	9.04589		9.58634	9.84231		9.05786	9.67047
YLR043C		13.9101	13.5904	13.829	13.3443	12.7973	13.7095	12.0762	12.1983		13.3443	13.3515		13.9101	13.5904		13.7095	13.6729		13.2264	13.2785
YLR044C		17.6533	16.3767	17.0994	16.8413	14.9862	17.461	16.4947	17.4613		16.8413	15.9576		17.6533	16.3767		17.461	15.8363		16.7658	16.6683
YLR045C		8.00139	7.8213	9.27306	8.03936	8.08942	8.3679	6.88938	7.07872		8.03936	7.67404		8.00139	7.8213		8.3679	8.10347		9.02554	8.99389
YLR046C		9.10519	9.69707	8.89428	9.22178	8.26959	9.3955	10.5102	9.91305		9.22178	10.1164		9.10519	9.69707		9.3955	10.0545		9.58502	9.14368
YLR047C		7.82486	8.40706	7.34131	8.47667	7.64937	8.69306	9.0609	9.07915		8.47667	9.25985		7.82486	8.40706		8.69306	9.89437		7.59246	7.51215
YLR048W		15.9661	13.4885	15.1101	14.814	12.8829	15.5131	10.413	10.8699		14.814	12.9733		15.9661	13.4885		15.5131	11.9631		14.0836	14.0168
YLR049C		8.73727	8.35533	9.16918	8.56157	8.88186	8.78017	9.50931	10.4669		8.56157	9.06673		8.73727	8.35533		8.78017	7.9314		9.46758	9.33969
YLR050C		10.8272	11.3859	11.0101	11.8351	9.8667	10.9048	10.5924	10.7231		11.8351	11.4784		10.8272	11.3859		10.9048	10.7743		9.90872	10.1386
YLR051C		9.49875	8.08201	11.7077	9.33653	9.99887	10.0421	7.40574	7.53234		9.33653	7.86231		9.49875	8.08201		10.0421	7.21859		10.318	10.3723
YLR052W		9.39919	9.10105	10.3012	8.92683	9.41884	9.83746	8.32727	8.67423		8.92683	8.78421		9.39919	9.10105		9.83746	9.13726		9.86199	9.72683
YLR053C		7.72898	7.7261	4.49031	7.40739	7.57775	8.11338	11.1342	12.8649		7.40739	8.16397		7.72898	7.7261		8.11338	7.55948		8.10758	7.65717
YLR055C		9.17003	8.5451	9.35009	7.54784	8.63844	8.46945	8.50744	8.37571		7.54784	7.97945		9.17003	8.5451		8.46945	7.79348		8.95425	8.95841
YLR056W		13.9251	13.4965	13.461	13.8768	12.3669	13.9923	13.4329	13.2025		13.8768	12.5958		13.9251	13.4965		13.9923	10.2473		12.6031	12.4545
YLR057W		7.86928	7.89588	8.72869	8.80946	8.06599	8.75897	7.51007	7.33788		8.80946	8.0321		7.86928	7.89588		8.75897	6.77239		8.52082	8.54537
YLR058C		15.5835	11.7663	11.7213	14.1836	13.8531	13.7109	10.5242	9.73413		14.1836	13.5551		15.5835	11.7663		13.7109	9.65437		12.372	12.0348
YLR059C		10.4267	10.2351	10.9312	10.0056	9.91909	10.3745	9.3563	8.8714		10.0056	9.23594		10.4267	10.2351		10.3745	9.93034		9.9398	9.68958
YLR060W		12.3269	10.1883	12.4385	11.9371	10.7089	12.4769	8.95284	7.17446		11.9371	10.8853		12.3269	10.1883		12.4769	11.088		12.0612	11.9454
YLR061W		14.7901	12.6189	15.4173	14.2489	12.9276	14.9316	9.61263	9.88133		14.2489	12.8923		14.7901	12.6189		14.9316	11.4653		14.4239	14.372
YLR062C		15.4791	13.2163	8.1268	15.0139	13.5437	15.7887	10.3969	10.7302		15.0139	13.6338		15.4791	13.2163		15.7887	12.3345		15.4309	15.379
YLR063W		8.67164	7.77195	9.14572	8.40226	8.05379	8.83438	6.98628	5.95593		8.40226	5.58577		8.67164	7.77195		8.83438	5.67003		8.72571	8.61748
YLR064W		11.0531	10.9293	10.0394	11.8599	9.49035	10.915	11.1955	10.8218		11.8599	10.9983		11.0531	10.9293		10.915	11.7822		10.1753	10.2659
YLR065C		11.4571	10.5074	11.2594	10.6603	10.4837	11.5113	7.96952	7.88584		10.6603	10.0619		11.4571	10.5074		11.5113	10.3832		10.7119	10.9115
YLR066W		10.9803	10.7545	11.0532	10.8487	10.5263	11.3465	8.51422	8.88708		10.8487	10.3643		10.9803	10.7545		11.3465	11.3917		10.6174	10.5907
YLR067C		6.8582	6.16807	7.68051	6.8006	6.8987	7.09141	6.98886	7.17819		6.8006	7.03252		6.8582	6.16807		7.09141	6.17421		7.8888	7.6794
YLR068W		7.83619	6.36359	11.6214	9.09637	9.06688	9.22128	6.83084	7.27956		9.09637	6.24909		7.83619	6.36359		9.22128	4.72335		10.2908	10.2131
YLR069C		8.10823	8.55987	9.4842	8.467	7.52004	8.31225	9.83441	8.94238		8.467	9.2945		8.10823	8.55987		8.31225	8.72816		9.41117	9.40834
YLR070C		7.39417	8.94569	5.09168	7.02422	6.82738	7.18502	9.31946	9.19101		7.02422	7.94942		7.39417	8.94569		7.18502	8.18579		6.11058	6.03869
YLR071C		8.20187	7.79883	8.53401	8.33122	8.0673	8.57029	8.8817	9.07288		8.33122	8.30332		8.20187	7.79883		8.57029	8.27021		8.89971	8.61756
YLR072W		8.52345	8.84282	8.20372	8.1358	8.85889	8.13867	8.7523	8.84426		8.1358	9.00146		8.52345	8.84282		8.13867	8.7328		8.64342	8.37888
YLR073C		10.6056	9.63538	10.6684	7.70765	8.73468	10.2625	7.21621	6.12724		7.70765	5.23125		10.6056	9.63538		10.2625	6.92261		9.95053	9.88422
YLR074C		11.2005	10.3336	12.998	10.4465	10.9614	10.982	10.1752	10.2172		10.4465	7.12065		11.2005	10.3336		10.982	8.10875		11.3152	11.1955
YLR075W		16.6109	14.5948	17.2206	15.9772	14.8011	16.7887	12.6918	13.6217		15.9772	14.7203		16.6109	14.5948		16.7887	16.1556		16.012	16.0629
YLR076C		16.6853	14.6134	8.75239	16.0506	14.7866	16.9091	12.7212	13.6228		16.0506	14.8066		16.6853	14.6134		16.9091	16.2575		16.3942	16.4523
YLR077W		8.2548	8.67182	9.07284	8.11038	9.30021	8.97861	10.0761	10.6582		8.11038	8.35337		8.2548	8.67182		8.97861	9.27398		9.10097	8.958
YLR078C		9.47335	9.88784	10.2065	9.51361	9.78236	9.7391	9.17601	10.1842		9.51361	9.20178		9.47335	9.88784		9.7391	9.75697		9.96049	10.1752
YLR079W		9.79936	9.87623	10.516	9.25203	11.1526	9.39832	9.99199	10.8649		9.25203	9.74221		9.79936	9.87623		9.39832	9.18168		10.2653	10.1185
YLR080W		5.87347	9.43163	6.42751	6.271	8.12412	6.29082	8.6258	9.38315		6.271	7.37005		5.87347	9.43163		6.29082	8.90488		7.18501	7.63967
YLR081W		6.04246	6.55851	3.24308	7.30382	6.92124	5.81324	7.67108	6.94503		7.30382	7.69788		6.04246	6.55851		5.81324	5.91423		5.55222	5.93601
YLR082C		7.4723	8.01095	8.3033	7.51872	9.14483	7.49827	7.20062	7.57686		7.51872	7.78748		7.4723	8.01095		7.49827	7.90071		8.16179	8.40788
YLR083C		12.2241	10.0911	10.2282	11.2057	9.08407	12.1702	8.45238	8.58819		11.2057	10.1168		12.2241	10.0911		12.1702	9.33868		10.6864	10.561
YLR084C		9.03099	7.95474	8.42039	8.46636	7.58014	9.19145	7.05897	6.51675		8.46636	9.06335		9.03099	7.95474		9.19145	7.87441		8.75647	8.69088
YLR085C		9.0499	8.32094	9.04011	8.59488	8.68748	8.69615	8.66462	8.37341		8.59488	8.66742		9.0499	8.32094		8.69615	9.50005		8.47762	8.4751
YLR086W		6.84076	6.51328	8.24949	7.30606	7.6508	7.95062	7.45702	8.41838		7.30606	6.97198		6.84076	6.51328		7.95062	7.16978		8.41661	8.50314
YLR087C		7.13437	6.16107	6.49221	6.34345	5.39302	7.34065	8.52723	8.43596		6.34345	6.25152		7.13437	6.16107		7.34065	5.97878		6.84082	6.79493
YLR088W		9.71909	9.58281	8.9785	9.67723	8.42623	9.98401	8.96592	8.77144		9.67723	9.19293		9.71909	9.58281		9.98401	9.02314		9.42131	9.34149
YLR089C		11.0798	11.0169	9.90724	10.7737	11.1953	11.07	10.0486	9.22978		10.7737	11.3329		11.0798	11.0169		11.07	10.6441		9.81934	9.99308
YLR090W		8.87677	8.71707	9.63082	8.31098	9.11655	8.65301	8.55848	8.11292		8.31098	8.78333		8.87677	8.71707		8.65301	9.39426		9.2879	9.0393
YLR091W		9.09171	8.86799	8.56795	8.65702	8.87901	8.97135	8.51769	8.18894		8.65702	9.12661		9.09171	8.86799		8.97135	8.5009		8.06311	8.30748
YLR092W		7.08469	7.64156	7.08055	8.0926	12.0622	7.31068	9.2043	10.4471		8.0926	8.38594		7.08469	7.64156		7.31068	7.86382		6.83062	6.88426
YLR093C		9.53925	10.8812	10.3984	9.79131	10.8431	9.92784	10.1671	10.7902		9.79131	10.4887		9.53925	10.8812		9.92784	11.0532		9.92659	10.3265
YLR094C		9.04603	9.10003	8.84378	8.59089	8.99579	8.36808	9.79847	9.83049		8.59089	9.16292		9.04603	9.10003		8.36808	7.78885		9.0464	8.85694
YLR095C		8.69699	8.16479	8.91154	8.24272	8.85229	8.566	7.94091	8.30143		8.24272	8.75144		8.69699	8.16479		8.566	8.67822		9.18299	9.13444
YLR096W		8.48143	7.62175	9.03395	8.3477	7.88635	8.92008	8.53658	7.51001		8.3477	8.72407		8.48143	7.62175		8.92008	8.10952		8.79831	8.59197
YLR097C		8.3507	9.18458	8.59985	8.7905	9.47694	8.76786	8.95707	9.79466		8.7905	9.00548		8.3507	9.18458		8.76786	9.98652		9.09064	9.16483
YLR098C		7.88318	8.11619	7.85335	7.87757	7.77033	8.27327	8.49401	7.83291		7.87757	7.78934		7.88318	8.11619		8.27327	8.23061		7.98299	7.66824
YLR099C		9.62519	9.59151	10.1794	10.2541	9.24021	9.13955	10.8801	10.6894		10.2541	11.8254		9.62519	9.59151		9.13955	8.61013		9.14952	9.0065
YLR099W-A		10.2017	10.4361	11.027	10.6194	9.88514	10.0628	9.19333	9.94915		10.6194	11.3588		10.2017	10.4361		10.0628	9.53585		9.78914	10.0363
YLR100W		11.3111	10.5076	12.3807	12.0355	10.5686	11.5292	10.6358	10.5121		12.0355	12.007		11.3111	10.5076		11.5292	11.331		10.9898	11.0557
YLR101C		10.8401	10.2098	7.63568	11.8941	10.3184	11.3958	10.2296	10.4877		11.8941	11.8561		10.8401	10.2098		11.3958	11.273		11.1753	11.0961
YLR102C		6.73635	8.4612	8.6861	7.98685	8.84822	7.78826	8.4158	9.53037		7.98685	8.76366		6.73635	8.4612		7.78826	9.63838		8.46581	8.4057
YLR103C		7.17986	7.42957	8.39898	7.05455	7.65808	7.93584	5.20356	5.00647		7.05455	6.7622		7.17986	7.42957		7.93584	7.70686		8.34713	8.29607
YLR104W		10.9359	10.3238	10.5753	10.9119	10.2713	10.6032	9.91479	10.3741		10.9119	10.7289		10.9359	10.3238		10.6032	10.5903		10.0695	10.021
YLR105C		8.80303	8.60719	9.29215	9.63887	8.45052	8.87336	7.66442	8.04948		9.63887	9.17649		8.80303	8.60719		8.87336	8.19945		8.65017	9.04898
YLR106C		8.68014	6.20684	9.37939	8.30893	6.23721	8.9235	7.50601	6.4835		8.30893	4.78415		8.68014	6.20684		8.9235	4.83484		7.96518	7.83881
YLR107W		8.16443	9.14628	9.1746	8.9251	9.31591	8.72551	9.09198	8.34656		8.9251	8.76066		8.16443	9.14628		8.72551	8.33177		8.72299	8.83968
YLR108C		5.89785	7.53415	7.4927	8.10987	7.33663	8.44905	9.28324	8.49611		8.10987	10.6822		5.89785	7.53415		8.44905	11.8502		8.89436	8.63257
YLR109W		13.722	14.4196	14.1837	13.2374	14.1788	15.0128	16.5486	16.253		13.2374	15.4062		13.722	14.4196		15.0128	16.8814		15.9247	15.7682
YLR110C		19.1153	17.7514	18.1824	18.2554	16.7404	18.5131	17.296	16.7906		18.2554	17.3626		19.1153	17.7514		18.5131	17.8084		17.0066	17.0336
YLR111W		5.0358	5.8171	4.54008	7.45516	6.45686	5.0209	4.82492	4.42929		7.45516	7.12131		5.0358	5.8171		5.0209	6.96344		5.11787	4.30901
YLR112W		8.76558	6.90623	8.88105	8.76909	8.06454	8.451	6.13391	4.90178		8.76909	8.75865		8.76558	6.90623		8.451	8.51327		8.10493	8.27183
YLR113W		11.8036	10.6517	11.5794	11.8989	10.8287	11.2488	11.3654	11.2713		11.8989	11.4597		11.8036	10.6517		11.2488	11.4582		11.1907	11.2451
YLR114C		9.22057	8.27753	9.7132	8.78594	9.63711	9.70097	8.90266	9.89291		8.78594	9.03473		9.22057	8.27753		9.70097	9.33395		9.86435	9.71887
YLR115W		7.6552	7.60119	8.48333	8.48389	7.61949	8.53813	7.71976	7.57354		8.48389	8.42125		7.6552	7.60119		8.53813	8.7084		8.50394	8.48795
YLR116W		9.237	8.98291	9.27505	8.74503	8.28338	8.86632	9.56855	9.02109		8.74503	9.23298		9.237	8.98291		8.86632	8.09361		9.09765	8.79055
YLR117C		7.68729	8.08344	8.59003	8.13801	8.70197	7.94229	8.67689	9.1205		8.13801	8.0039		7.68729	8.08344		7.94229	8.13339		8.49948	8.44093
YLR118C		10.404	10.548	9.97461	9.80507	9.6234	10.1752	10.6993	10.6051		9.80507	9.79088		10.404	10.548		10.1752	11.0874		10.0382	10.2363
YLR119W		7.66193	7.56621	8.01925	7.78397	9.14613	7.67321	7.84365	8.17572		7.78397	7.9222		7.66193	7.56621		7.67321	8.61435		8.40348	8.20327
YLR120C		10.7548	11.0349	9.17508	12.6934	8.9962	10.0912	12.5118	11.6482		12.6934	12.506		10.7548	11.0349		10.0912	9.97287		8.86599	8.96728
YLR120W-A		10.1112	9.67045	6.24703	11.2665	8.38717	9.19378	10.0554	10.7212		11.2665	7.3184		10.1112	9.67045		9.19378	7.96066		8.67282	9.23836
YLR121C		10.2716	10.2319	8.39898	11.8385	9.43836	9.85901	11.5537	11.915		11.8385	10.0152		10.2716	10.2319		9.85901	9.87142		8.74349	8.76535
YLR122C		5.48445	8.14097	5.7257	8.12601	8.38216	7.1657	8.54894	8.62146		8.12601	7.61927		5.48445	8.14097		7.1657	6.55066		7.07251	6.71111
YLR123C		6.34134	8.07609	6.03282	8.43697	8.45641	7.463	8.60616	8.52981		8.43697	7.6934		6.34134	8.07609		7.463	6.92462		6.97892	6.644
YLR124W		7.42196	7.88999	6.51845	7.2748	6.25335	6.15515	7.79621	7.60703		7.2748	6.28474		7.42196	7.88999		6.15515	6.37198		4.32983	3.67298
YLR125W		7.23218	8.02245	7.98239	9.20961	7.39958	7.75783	8.28949	7.99604		9.20961	8.133		7.23218	8.02245		7.75783	7.73083		7.01589	6.944
YLR126C		8.96232	9.38217	9.9431	9.43649	9.84323	9.46833	8.32154	8.83139		9.43649	8.18811		8.96232	9.38217		9.46833	9.39077		9.55559	9.4177
YLR127C		7.748	7.83405	7.50663	8.03505	7.91042	7.80377	7.78512	7.62772		8.03505	7.68337		7.748	7.83405		7.80377	8.52507		7.69147	7.68124
YLR128W		6.96348	8.61011	7.78969	7.19796	8.36734	7.23106	7.62252	7.85885		7.19796	7.34753		6.96348	8.61011		7.23106	8.10525		7.62193	7.75898
YLR129W		9.42485	7.37123	10.5724	9.57917	8.28381	10.1908	7.8839	6.04842		9.57917	6.97551		9.42485	7.37123		10.1908	6.0944		9.71754	9.63723
YLR130C		11.7397	10.2671	10.9159	11.4161	12.8995	11.8802	8.53868	8.18219		11.4161	10.0635		11.7397	10.2671		11.8802	9.74486		10.1019	10.001
YLR131C		7.69382	7.82718	8.91752	7.56588	8.54012	7.97263	8.30021	8.79173		7.56588	7.73777		7.69382	7.82718		7.97263	6.22703		8.96844	8.64898
YLR132C		7.71852	7.81008	7.58275	7.22082	7.11557	6.95888	8.32928	8.36076		7.22082	8.42194		7.71852	7.81008		6.95888	8.59097		7.65341	7.70863
YLR133W		8.30963	8.47055	8.548	8.83758	8.79253	8.13551	10.1591	9.96191		8.83758	8.97978		8.30963	8.47055		8.13551	10.2631		8.36301	8.37551
YLR134W		8.26001	7.16166	7.56249	9.02991	12.7239	10.1213	11.9754	12.4162		9.02991	9.30118		8.26001	7.16166		10.1213	9.31403		7.54884	7.39014
YLR135W		6.5606	6.91292	7.71298	7.39643	7.79667	7.15459	7.34197	8.11575		7.39643	6.77227		6.5606	6.91292		7.15459	7.08279		7.67816	7.72453
YLR136C		6.57402	10.2378	7.52407	6.87331	11.6031	8.27826	8.65914	7.94648		6.87331	6.89736		6.57402	10.2378		8.27826	11.2377		9.0304	8.49815
YLR137W		8.1841	8.44936	8.3745	8.19478	8.38148	8.09693	7.42669	6.02207		8.19478	8.77449		8.1841	8.44936		8.09693	8.78558		8.27625	8.28031
YLR138W		9.87052	9.07032	9.90554	10.285	8.76594	10.3427	9.63172	9.10481		10.285	9.77429		9.87052	9.07032		10.3427	9.40893		9.54578	9.62423
YLR139C		7.96121	8.09346	7.71764	7.57891	6.92898	7.61129	8.01634	6.99608		7.57891	8.36276		7.96121	8.09346		7.61129	7.05603		8.13596	7.79488
YLR140W		7.93947	8.99705	7.14231	8.17229	8.05378	7.59215	7.87352	7.99468		8.17229	7.81456		7.93947	8.99705		7.59215	8.26947		6.52261	6.20971
YLR141W		8.88974	8.92475	8.61923	8.47669	8.17256	7.88081	8.08308	8.13798		8.47669	8.3941		8.88974	8.92475		7.88081	7.75329		7.50883	7.66888
YLR142W		5.94724	11.0098	9.19301	7.4098	7.49397	6.05597	12.184	8.49829		7.4098	6.38106		5.94724	11.0098		6.05597	6.26996		6.2471	6.34854
YLR143W		8.73087	7.71492	8.83583	8.50155	7.73796	8.57281	6.53712	5.68428		8.50155	7.8823		8.73087	7.71492		8.57281	8.07479		8.49022	8.57213
YLR144C		8.61765	8.87461	8.03327	9.03604	7.7994	9.01329	9.06864	8.84399		9.03604	9.2299		8.61765	8.87461		9.01329	10.0858		8.4547	8.28618
YLR145W		7.58422	7.71352	9.3564	8.03951	9.32478	7.94661	7.37052	7.9492		8.03951	7.6207		7.58422	7.71352		7.94661	7.93333		9.13182	8.76715
YLR146C		10.3812	8.19983	10.1122	9.61289	8.57753	10.1098	8.19307	7.718		9.61289	8.74276		10.3812	8.19983		10.1098	8.30632		9.17692	9.11774
YLR146W-A		9.81435	9.19888	10.4716	9.13737	8.98742	9.0664	7.85151	8.63874		9.13737	8.25375		9.81435	9.19888		9.0664	8.45118		8.861	8.86312
YLR147C		9.24024	8.58549	11.0357	9.71466	9.93632	9.18982	7.9913	8.52856		9.71466	9.34943		9.24024	8.58549		9.18982	8.3731		9.72529	9.75293
YLR148W		7.23638	7.46847	8.20449	7.94968	7.73869	7.57331	7.48966	7.93437		7.94968	7.68584		7.23638	7.46847		7.57331	7.65353		8.34635	8.18234
YLR149C		5.51265	10.393	5.01118	6.26478	8.2677	5.7482	11.2547	10.7971		6.26478	9.58835		5.51265	10.393		5.7482	9.03062		6.45167	6.8121
YLR149C-A		14.4846	13.1852	9.269	12.5314	11.6223	12.552	10.0281	10.9731		12.5314	11.2531		14.4846	13.1852		12.552	10.328		8.53973	7.24545
YLR150W		14.9794	13.3386	16.0243	14.4564	13.0129	15.2674	11.5022	11.7092		14.4564	13.1653		14.9794	13.3386		15.2674	13.1576		15.0893	15.0479
YLR151C		7.19771	8.5951	7.22248	6.50108	8.35492	6.77461	8.34526	9.00975		6.50108	7.66589		7.19771	8.5951		6.77461	7.37735		7.36655	8.07062
YLR152C		8.80184	10.5258	7.56762	9.97922	9.26092	8.11691	10.8451	10.8687		9.97922	10.9559		8.80184	10.5258		8.11691	8.28902		7.75778	7.87742
YLR153C		12.3009	11.6852	12.6426	13.3278	10.4918	11.9911	12.5352	10.48		13.3278	13.0476		12.3009	11.6852		11.9911	10.7524		11.5306	11.4811
YLR154C		9.7767	10.1115	11.0871	9.72034	9.52536	9.50951	7.86931	7.12973		9.72034	9.28265		9.7767	10.1115		9.50951	8.54826		10.3037	10.4314
YLR154W-A		4.93154	4.92036	7.33375	14.601	11.8197	14.7352	15.6797	15.4677		14.601	14.8284		4.93154	4.92036		14.7352	13.9238		11.2435	12.153
YLR154W-B		5.10437	5.09319	7.55314	14.5998	11.7227	14.3218	16.1866	15.816		14.5998	14.8544		5.10437	5.09319		14.3218	13.2553		10.5904	11.765
YLR154C-G		5.24188	5.1547	15.0685	14.8282	11.9349	14.9313	16.225	15.8282		14.8282	15.0836		5.24188	5.1547		14.9313	14.0528		12.1264	12.9272
YLR155C		12.2123	12.6306	10.751	-1.53553	11.2591	11.2148	11.6034	10.352		-1.53553	-1.77352		12.2123	12.6306		11.2148	11.7562		9.94762	10.1491
YLR156W		6.85321	8.05851	5.56501	0.122801	8.13707	5.73095	7.9833	6.77053		0.122801	-0.11519		6.85321	8.05851		5.73095	8.04523		5.32983	6.13241
YLR156C-A		6.5783	8.18728	5.79906	5.74833	9.73518	7.8624	8.74487	10.0217		5.74833	4.00784		6.5783	8.18728		7.8624	8.64073		5.71589	6.38096
YLR157C		12.122	12.6866	10.6676	-1.53553	11.245	11.2203	11.672	10.4238		-1.53553	-1.77352		12.122	12.6866		11.2203	11.7699		10.0893	10.059
YLR157W-D		6.54895	6.59329	5.76075	3.55551	8.01473	5.39754	8.05455	6.93194		3.55551	2.31752		6.54895	6.59329		5.39754	8.09621		5.44061	5.36872
YLR158C		12.1387	12.5648	10.6727	-1.53553	11.2537	11.207	11.6396	10.4002		-1.53553	-1.77352		12.1387	12.5648		11.207	11.7559		9.89066	10.0645
YLR159W		5.98473	6.83478	6.76117	0.122801	8.15048	5.8476	7.96367	6.96318		0.122801	-0.11519		5.98473	6.83478		5.8476	8.11974		5.32983	5.25794
YLR160C		12.2084	12.5544	10.6343	-1.53553	11.2553	11.235	11.6351	10.3401		-1.53553	-1.77352		12.2084	12.5544		11.235	11.7519		10.1924	10.1516
YLR161W		6.35321	7.62726	6.56501	0.122801	8.1018	5.75695	7.90313	6.70014		0.122801	-0.11519		6.35321	7.62726		5.75695	8.30653		4.74487	6.13241
YLR163W-A		9.37477	9.78256	7.37905	9.59347	10.1204	9.73063	9.39377	9.79596		9.59347	9.55324		9.37477	9.78256		9.73063	12.1611		10.5322	9.9144
YLR163C		9.25456	9.54652	10.0555	8.97795	9.67103	9.3684	9.72302	9.72749		8.97795	9.30879		9.25456	9.54652		9.3684	11.6993		9.87759	9.83603
YLR164W		8.67057	13.2172	6.99826	7.3989	9.7048	8.29819	9.28992	8.96748		7.3989	8.53399		8.67057	13.2172		8.29819	11.154		7.77444	7.7323
YLR165C		8.14322	8.08313	7.5061	7.56057	8.83414	7.32738	8.03437	9.26002		7.56057	7.66603		8.14322	8.08313		7.32738	7.85815		7.66209	7.88167
YLR166C		8.17844	8.20849	8.54986	8.52078	8.07981	8.54564	7.95967	8.54696		8.52078	8.30147		8.17844	8.20849		8.54564	8.84706		8.72002	8.60203
YLR167W		16.8666	14.641	18.0212	16.9101	15.3036	17.6588	11.6929	12.4118		16.9101	15.2024		16.8666	14.641		17.6588	16.305		16.6414	16.6404
YLR168C		9.01865	9.09599	10.1774	9.90879	8.56348	8.42907	10.6162	10.404		9.90879	9.53835		9.01865	9.09599		8.42907	9.57625		9.01473	9.4216
YLR169W		8.27905	9.21752	5.61282	8.75335	9.89907	9.00556	6.43713	6.95577		8.75335	8.77774		8.27905	9.21752		9.00556	9.69782		9.87764	10.175
YLR171W		8.9748	9.45311	5.31213	8.83264	10.1194	9.2776	7.21168	7.70913		8.83264	8.67692		8.9748	9.45311		9.2776	9.95276		9.87177	9.97183
YLR170C		9.01849	9.69634	10.6493	9.0569	10.3465	9.53025	7.36911	7.84795		9.0569	8.9757		9.01849	9.69634		9.53025	10.1663		10.1286	10.2737
YLR172C		11.8349	10.8384	11.5453	11.3576	9.92387	11.6397	10.4705	10.0166		11.3576	9.64869		11.8349	10.8384		11.6397	10.2499		11.0292	11.1241
YLR173W		8.11766	9.92069	7.6841	8.10361	8.02014	8.24764	10.2348	9.69962		8.10361	8.63412		8.11766	9.92069		8.24764	8.53893		7.85576	7.82276
YLR174W		6.86582	13.8473	6.76688	6.29448	7.13526	6.83141	10.5199	8.45555		6.29448	7.50519		6.86582	13.8473		6.83141	7.38825		6.73325	6.44318
YLR175W		12.3589	9.84144	13.7188	12.211	10.7892	12.9187	9.54125	8.70145		12.211	9.36592		12.3589	9.84144		12.9187	8.50939		12.5442	12.4082
YLR176C		6.30139	6.43368	7.13911	6.73108	6.63077	6.48142	8.92698	8.74324		6.73108	8.26		6.30139	6.43368		6.48142	7.51107		7.50245	7.21945
YLR177W		8.55532	8.26353	7.28128	8.83949	9.66961	8.03527	11.2327	10.7883		8.83949	10.8341		8.55532	8.26353		8.03527	9.56582		8.3649	8.38646
YLR178C		8.29811	13.4077	8.43465	9.54473	12.8465	8.61506	15.5694	15.3932		9.54473	11.0354		8.29811	13.4077		8.61506	12.302		10.099	10.4479
YLR179C		13.2653	10.9022	13.2449	12.2783	14.7861	12.8635	12.0794	12.4743		12.2783	11.3482		13.2653	10.9022		12.8635	11.8442		12.8025	12.8432
YLR180W		14.2558	8.8768	13.6264	13.8311	13.6378	13.6129	11.4417	10.4474		13.8311	11.2542		14.2558	8.8768		13.6129	9.21556		12.7131	12.6026
YLR181C		9.12639	8.56348	10.1862	8.70235	9.1807	9.18668	8.41857	9.47324		8.70235	8.59908		9.12639	8.56348		9.18668	8.90361		9.83069	9.92914
YLR182W		8.23549	7.12682	8.92937	8.20818	8.40879	8.61052	8.17041	8.89119		8.20818	7.88857		8.23549	7.12682		8.61052	7.85365		8.95611	8.88701
YLR183C		8.18715	7.69872	10.1009	8.37964	8.34304	9.11361	7.56534	7.13256		8.37964	7.7498		8.18715	7.69872		9.11361	7.95052		9.4285	9.46141
YLR184W		4.10375	3.94057	4.40051	1.84728	2.62621	3.47086	2.76135	2.95069		1.84728	1.02432		4.10375	3.94057		3.47086	1.6862		2.73238	2.50848
YLR185W		14.5783	12.5582	14.6042	14.0356	12.4815	13.8914	9.86556	10.6021		14.0356	12.2626		14.5783	12.5582		13.8914	11.7545		13.6064	13.6459
YLR186W		11.598	9.84407	12.1166	11.0367	10.0584	11.6759	8.56708	7.19491		11.0367	9.39716		11.598	9.84407		11.6759	8.57101		10.9954	10.8046
YLR187W		7.11895	6.41502	7.60324	6.40379	6.61409	7.19081	7.6946	8.05711		6.40379	6.83519		7.11895	6.41502		7.19081	6.42758		7.45032	7.17958
YLR188W		9.60267	9.50581	9.57714	9.22617	9.32029	9.91096	8.90601	8.68012		9.22617	9.02479		9.60267	9.50581		9.91096	9.80474		9.44433	9.26782
YLR189C		7.86715	8.50713	8.39418	7.36435	8.7369	8.44461	9.71702	10.5243		7.36435	8.82022		7.86715	8.50713		8.44461	8.99259		8.72249	8.7087
YLR190W		10.4727	10.256	10.7012	9.78696	9.44082	10.3812	10.2237	11.0382		9.78696	9.71869		10.4727	10.256		10.3812	8.49141		10.0846	9.76825
YLR191W		8.0828	8.83636	8.82219	8.2452	8.54359	8.16577	8.42402	8.399		8.2452	8.69551		8.0828	8.83636		8.16577	8.95956		8.50196	8.79264
YLR192C		12.2875	10.8794	13.1964	11.6624	11.8049	12.1681	9.97344	10.1328		11.6624	11.1694		12.2875	10.8794		12.1681	12.214		12.5574	12.5123
YLR193C		9.3637	10.246	9.68868	9.55113	10.1317	9.3831	10.3911	10.8263		9.55113	10.0811		9.3637	10.246		9.3831	10.4145		9.26021	9.51025
YLR194C		10.5146	10.1971	11.2509	13.6743	10.563	10.8082	12.3474	10.6681		13.6743	11.0879		10.5146	10.1971		10.8082	10.159		9.72012	9.49566
YLR195C		10.0089	9.04447	10.1135	10.2835	9.69329	10.1755	8.39377	8.75932		10.2835	9.60304		10.0089	9.04447		10.1755	9.90622		10.1732	10.1854
YLR196W		10.5049	8.29561	12.2066	10.5135	9.32117	11.1732	8.48308	6.75864		10.5135	7.21767		10.5049	8.29561		11.1732	6.68664		10.9356	10.7233
YLR197W		12.3558	9.55428	13.4712	11.5732	10.5981	12.7634	9.08834	7.48674		11.5732	8.73268		12.3558	9.55428		12.7634	8.49994		12.5857	12.5659
YLR198C		12.3431	9.4186	8.74953	11.3134	10.5026	12.4983	8.852	7.80867		11.3134	8.53		12.3431	9.4186		12.4983	8.36879		12.8269	12.7765
YLR199C		9.73423	9.83788	9.91204	10.6118	9.41619	9.64542	9.09144	8.66833		10.6118	10.5576		9.73423	9.83788		9.64542	10.0008		9.33454	9.37118
YLR200W		9.60433	7.685	12.0216	9.7826	10.7208	10.5938	7.88237	8.53809		9.7826	9.38111		9.60433	7.685		10.5938	9.49064		10.8482	10.8379
YLR201C		9.99091	11.456	9.16871	9.96891	10.2713	9.56185	10.9302	10.7713		9.96891	10.9952		9.99091	11.456		9.56185	10.6117		9.48131	9.55126
YLR202C		9.11266	10.2109	8.19294	8.17148	8.39596	7.77164	9.80115	9.43957		8.17148	9.22877		9.11266	10.2109		7.77164	8.85286		8.57398	8.6342
YLR203C		11.0449	10.912	10.068	9.74487	9.04997	10.1323	11.6768	10.9096		9.74487	10.9528		11.0449	10.912		10.1323	10.8912		10.1498	10.2085
YLR204W		10.3523	10.834	11.4073	10.1411	10.7627	9.7623	10.3856	10.6971		10.1411	10.4939		10.3523	10.834		9.7623	10.6573		10.4483	10.355
YLR205C		6.80479	9.37224	9.46835	10.2295	5.94626	6.28895	11.446	7.68561		10.2295	12.0815		6.80479	9.37224		6.28895	9.37675		7.70374	7.5979
YLR206W		9.52631	9.70805	10.102	9.68792	9.50046	10.0101	11.1874	11.1114		9.68792	10.5773		9.52631	9.70805		10.0101	11.4724		10.169	10.1827
YLR207W		8.52851	8.25719	7.95252	8.65061	8.50133	8.6195	8.86526	8.73897		8.65061	8.98897		8.52851	8.25719		8.6195	8.882		8.56945	8.62834
YLR208W		12.1039	10.9943	12.3531	11.4301	11.0508	12.0679	11.0112	11.1052		11.4301	11.2891		12.1039	10.9943		12.0679	11.5712		11.5988	11.5789
YLR209C		10.8545	10.5146	9.89176	10.3207	9.74548	10.2187	10.0955	9.73434		10.3207	10.1748		10.8545	10.5146		10.2187	10.6224		9.56234	9.70067
YLR210W		8.022	6.90837	8.54061	7.76152	8.21239	8.16364	7.17159	7.29989		7.76152	7.92395		8.022	6.90837		8.16364	7.18328		8.34165	8.24727
YLR211C		7.04476	8.66959	8.06514	7.19624	9.57829	7.19656	6.84284	7.56269		7.19624	7.96379		7.04476	8.66959		7.19656	7.85536		8.0702	8.04778
YLR212C		10.033	9.37763	8.76442	9.78758	8.98495	9.82771	5.43103	4.88955		9.78758	9.96977		10.033	9.37763		9.82771	9.79237		9.10249	9.26272
YLR213C		6.72808	8.20496	7.55588	6.40701	8.74467	6.71645	6.80171	5.54359		6.40701	7.21307		6.72808	8.20496		6.71645	7.61038		7.0753	6.07936
YLR214W		9.52206	11.3181	10.6261	10.2636	8.49757	10.6693	9.11254	7.51035		10.2636	8.05526		9.52206	11.3181		10.6693	13.3697		11.0488	7.73816
YLR215C		9.11357	8.34865	9.34227	9.28354	8.83661	8.63562	8.18957	8.32404		9.28354	8.96671		9.11357	8.34865		8.63562	7.71174		8.78799	8.75732
YLR217W		11.0105	11.9769	6.15561	12.0632	10.3564	11.6422	12.9612	12.9587		12.0632	11.9536		11.0105	11.9769		11.6422	13.8885		11.4465	11.5933
YLR216C		10.8703	11.7728	11.6544	12.2	10.4557	11.8865	13.1789	13.1403		12.2	12.1086		10.8703	11.7728		11.8865	14.1277		11.8959	11.9436
YLR218C		7.14955	7.94187	9.4059	8.36571	9.50594	7.94198	9.65239	9.27532		8.36571	9.22698		7.14955	7.94187		7.94198	9.16903		9.19744	9.28006
YLR219W		9.13586	10.1109	9.08169	8.36374	8.88353	8.874	10.5868	10.0404		8.36374	9.29363		9.13586	10.1109		8.874	9.23803		8.72804	8.84158
YLR220W		11.5582	11.6693	10.6941	10.5017	10.0318	10.876	10.6633	10.5695		10.5017	11.2695		11.5582	11.6693		10.876	11.3676		9.73878	9.83053
YLR221C		10.3037	8.80622	11.9677	9.99417	10.0542	10.9109	7.47529	7.85365		9.99417	7.60616		10.3037	8.80622		10.9109	8.39148		10.4098	10.3708
YLR222C		9.57886	7.99159	10.1341	9.65501	8.01786	9.99636	7.79513	4.73757		9.65501	7.16054		9.57886	7.99159		9.99636	5.5387		9.72175	9.54814
YLR222C-A		8.06343	6.63722	9.25087	6.9196	7.56898	6.95647	7.63795	7.71181		6.9196	6.42287		8.06343	6.63722		6.95647	4.28485		9.20621	9.00657
YLR223C		8.11459	6.76539	9.54313	7.24737	8.71076	8.62236	8.05613	7.94141		7.24737	6.72675		8.11459	6.76539		8.62236	5.6241		9.58503	9.44907
YLR224W		10.4265	9.55158	9.68728	10.0246	9.5985	10.0425	9.924	9.37356		10.0246	9.96379		10.4265	9.55158		10.0425	9.44675		9.74197	9.68405
YLR225C		9.85538	9.13477	9.0591	9.22348	10.6297	8.78072	9.02906	8.65457		9.22348	10.1688		9.85538	9.13477		8.78072	10.3262		9.59389	9.58751
YLR226W		8.62673	8.1932	8.68903	8.3159	8.63095	8.56658	7.64819	6.82317		8.3159	8.3351		8.62673	8.1932		8.56658	8.63968		8.76835	8.53297
YLR227C		8.38886	7.67434	7.23558	8.66178	8.22335	8.66351	7.97475	8.13021		8.66178	8.56693		8.38886	7.67434		8.66351	8.25574		8.46854	8.38388
YLR228C		8.54355	8.14556	8.12754	8.44611	9.08003	8.67225	9.72264	9.74411		8.44611	8.03661		8.54355	8.14556		8.67225	8.00841		8.23258	8.01272
YLR230W		13.3409	12.6774	6.82304	12.5512	11.1548	12.7092	11.0839	11.0451		12.5512	12.4108		13.3409	12.6774		12.7092	12.3791		11.7221	11.8089
YLR229C		13.0467	12.2632	12.3708	12.5035	11.0355	12.7813	11.1364	11.091		12.5035	12.3785		13.0467	12.2632		12.7813	12.4975		11.9697	11.9586
YLR232W		9.87913	10.4544	5.269	8.20483	9.89529	8.89443	9.46871	9.87352		8.20483	9.57122		9.87913	10.4544		8.89443	8.43418		9.44662	9.53085
YLR231C		10.0608	10.5538	8.618	8.96086	10.2081	9.53015	10.244	10.5564		8.96086	10.1498		10.0608	10.5538		9.53015	9.24077		9.6707	9.68627
YLR233C		6.64858	8.05573	6.86778	7.83021	7.8842	7.51413	7.63573	7.95737		7.83021	8.0412		6.64858	8.05573		7.51413	7.81128		7.38707	7.38014
YLR234W		6.5504	6.91183	6.83568	6.84801	6.59645	6.92803	8.21378	7.55744		6.84801	6.31372		6.5504	6.91183		6.92803	7.35415		6.88882	6.75863
YLR235C		5.48245	5.98024	4.27921	6.63487	6.73557	7.16613	8.83084	7.69198		6.63487	6.44173		5.48245	5.98024		7.16613	7.3962		6.53507	6.04815
YLR236C		5.07533	6.76031	5.07961	6.57486	6.93958	7.00504	8.53687	7.71674		6.57486	6.33687		5.07533	6.76031		7.00504	7.36922		6.42043	6.57094
YLR237W		9.84458	10.1286	8.59517	8.47696	13.0566	9.13219	12.8647	11.154		8.47696	8.14875		9.84458	10.1286		9.13219	8.39144		8.65396	8.61398
YLR238W		7.24101	7.06887	8.59064	7.15599	8.15967	7.19113	7.01923	7.20857		7.15599	7.53876		7.24101	7.06887		7.19113	7.3994		8.14591	8.29407
YLR239C		8.66942	8.47188	9.2849	8.48457	8.65969	8.21711	8.17625	8.49112		8.48457	8.45994		8.66942	8.47188		8.21711	9.07746		8.86504	8.65637
YLR240W		7.33941	7.9542	8.07137	8.06318	7.87557	7.95235	8.64706	8.75041		8.06318	8.41586		7.33941	7.9542		7.95235	8.90381		7.88703	8.15731
YLR241W		9.94448	10.0542	8.40978	10.4766	9.14093	9.79004	10.4333	10.4704		10.4766	10.458		9.94448	10.0542		9.79004	10.6548		9.13483	9.16534
YLR242C		9.18246	8.66138	8.11263	9.14473	8.23946	8.92188	6.94663	7.43195		9.14473	8.74121		9.18246	8.66138		8.92188	8.40335		8.35747	7.87405
YLR243W		9.70307	8.58546	10.4764	9.81625	8.95519	9.77071	7.30794	7.28069		9.81625	8.67981		9.70307	8.58546		9.77071	8.96459		9.44597	9.45361
YLR244C		12.0854	10.3854	11.3233	11.9439	11.373	11.8783	10.8929	10.8148		11.9439	10.7827		12.0854	10.3854		11.8783	10.5411		11.7021	11.6422
YLR245C		8.69798	9.11081	8.91159	8.62931	8.7529	8.7074	10.0815	9.64126		8.62931	8.5928		8.69798	9.11081		8.7074	9.27875		8.45285	8.38096
YLR246W		7.80962	9.15244	7.99606	7.88818	9.25326	8.06261	9.55584	9.71627		7.88818	8.24376		7.80962	9.15244		8.06261	8.62321		7.95648	8.0819
YLR247C		6.70663	7.76413	8.05686	8.42713	7.42009	7.83551	9.29323	9.78908		8.42713	8.59262		6.70663	7.76413		7.83551	8.22331		8.01094	8.09382
YLR248W		10.7086	10.5447	9.92564	10.1662	9.93564	10.9554	12.0343	12.7168		10.1662	10.5345		10.7086	10.5447		10.9554	11.8306		10.4543	10.4132
YLR249W		15.6605	12.519	15.0709	15.5702	13.0762	15.9053	13.188	11.9957		15.5702	12.7321		15.6605	12.519		15.9053	11.605		14.1822	14.071
YLR250W		11.0927	11.0983	11.152	11.0313	10.6161	11.169	10.516	11.2005		11.0313	11.578		11.0927	11.0983		11.169	12.5668		10.7528	10.9343
YLR251W		8.40555	11.1972	6.30334	9.24081	9.98027	8.12455	11.4236	11.4288		9.24081	11.869		8.40555	11.1972		8.12455	11.393		8.28293	8.99764
YLR252W		8.46514	11.1761	6.73807	9.39915	9.99381	8.25241	11.3711	11.4263		9.39915	12.0933		8.46514	11.1761		8.25241	11.5904		8.75082	9.18589
YLR253W		8.84263	8.24918	9.5616	8.66418	8.58803	8.6975	9.09569	8.78828		8.66418	9.28303		8.84263	8.24918		8.6975	9.19097		9.02425	9.05365
YLR254C		7.39062	8.46252	9.15669	8.64055	9.92842	7.83918	9.76028	11.3928		8.64055	8.52677		7.39062	8.46252		7.83918	7.95418		8.90314	9.04664
YLR255C		5.15509	4.49191	4.45185	5.52305	4.74711	5.56081	7.51805	5.98492		5.52305	4.99966		5.15509	4.49191		5.56081	5.19111		4.70771	4.22079
YLR256W		10.3669	10.259	8.05894	10.9083	10.2146	10.8723	11.3716	10.9892		10.9083	10.827		10.3669	10.259		10.8723	10.2165		9.67426	9.5601
YLR257W		11.4657	11.3436	12.188	13.2103	10.826	11.1181	12.8971	13.3918		13.2103	12.0902		11.4657	11.3436		11.1181	13.4582		11.279	11.4856
YLR258W		9.01285	11.7029	8.03162	8.1596	10.8727	8.10805	14.3136	14.2384		8.1596	11.8846		9.01285	11.7029		8.10805	12.1486		9.82206	10.1635
YLR259C		12.1245	12.5297	12.7324	12.9987	10.8898	12.9018	14.2711	13.2983		12.9987	13.0211		12.1245	12.5297		12.9018	13.8572		13.1015	13.0256
YLR260W		7.59346	7.78029	8.52189	8.44808	8.21863	7.83879	8.79298	9.16048		8.44808	8.73623		7.59346	7.78029		7.83879	9.09722		8.23555	8.21114
YLR261C		9.20087	9.15801	10.6504	9.79505	10.2583	9.96395	8.77001	9.23688		9.79505	9.87068		9.20087	9.15801		9.96395	10.0083		10.6614	10.7446
YLR262C		9.11374	9.08799	10.4536	9.53783	10.0668	9.65453	8.42669	9.05378		9.53783	9.62327		9.11374	9.08799		9.65453	9.69701		10.3353	10.3893
YLR262C-A		12.9013	12.2231	14.8291	12.7209	12.8898	13.2779	10.821	12.1584		12.7209	11.8823		12.9013	12.2231		13.2779	12.2065		13.1567	13.2856
YLR263W		5.38265	5.77516	6.63819	6.66043	6.9759	6.69817	6.32673	6.65434		6.66043	6.0684		5.38265	5.77516		6.69817	5.59625		7.02615	6.93351
YLR264W		15.8873	14.1242	15.0922	14.9874	13.0516	16.0402	11.0476	11.6099		14.9874	13.2607		15.8873	14.1242		16.0402	12.2758		13.7013	13.7484
YLR264C-A		15.0594	12.9283	7.95277	14.9341	12.4093	14.8635	9.90379	10.7197		14.9341	13.252		15.0594	12.9283		14.8635	10.7622		14.8265	14.7566
YLR265C		8.83714	9.34629	7.90488	8.93902	8.69152	8.92112	3.5192	2.3866		8.93902	8.47287		8.83714	9.34629		8.92112	8.62553		9.03248	9.13532
YLR266C		8.86198	9.02117	7.98754	9.17672	8.74082	8.68089	8.01263	7.73416		9.17672	9.25511		8.86198	9.02117		8.68089	9.67596		8.20649	8.29676
YLR267W		7.52655	10.0505	4.33811	7.48062	8.62328	6.72488	7.78842	6.65881		7.48062	8.11728		7.52655	10.0505		6.72488	7.57793		6.3399	6.36112
YLR268W		11.3535	10.2024	11.297	10.8981	10.3583	11.1117	10.1119	9.89125		10.8981	10.8873		11.3535	10.2024		11.1117	11.077		10.5803	10.6375
YLR270W		8.91685	11.475	8.85603	8.99476	10.4399	8.07391	11.9722	12.2677		8.99476	11.1646		8.91685	11.475		8.07391	11.4707		9.83547	10.0518
YLR269C		9.43695	10.1078	4.96413	8.64653	9.4682	9.10604	10.0933	10.3702		8.64653	9.66479		9.43695	10.1078		9.10604	9.82918		9.39242	8.89603
YLR271W		5.93445	8.21969	7.78139	7.65725	8.24885	7.20098	7.54947	9		7.65725	7.57343		5.93445	8.21969		7.20098	8.39336		8.05692	8.10168
YLR273C		6.36112	8.69559	6.4591	6.5984	7.61889	6.8619	8.23146	8.20806		6.5984	7.40596		6.36112	8.69559		6.8619	6.67877		7.24828	7.08328
YLR274W		8.67166	8.53881	9.15945	8.68466	8.43437	8.94647	7.83641	8.0605		8.68466	8.35385		8.67166	8.53881		8.94647	8.69238		8.94755	8.89297
YLR275W		8.89536	8.2881	9.80936	8.94074	10.2424	9.08459	7.23467	7.71351		8.94074	9.06693		8.89536	8.2881		9.08459	8.79695		8.94266	8.97883
YLR276C		10.0141	8.38384	11.5805	10.0134	9.3602	10.5726	7.69721	6.13624		10.0134	6.29127		10.0141	8.38384		10.5726	7.0325		10.5284	10.3447
YLR277C		8.5567	7.73462	8.68793	8.61691	7.9756	8.70507	7.51583	7.57927		8.61691	8.64348		8.5567	7.73462		8.70507	8.47319		8.70754	8.64246
YLR278C		8.29871	8.47683	8.14961	8.48626	7.88928	8.89007	8.99735	8.85243		8.48626	7.58951		8.29871	8.47683		8.89007	8.31462		8.67389	8.73193
YLR279W		6.83729	9.5995	4.81213	7.13135	9.48848	6.18625	7.57425	6.84519		7.13135	7.27779		6.83729	9.5995		6.18625	7.50618		6.96031	7.4961
YLR280C		7.12081	9.7168	7.60478	7.36887	9.58574	5.89595	7.50386	6.90793		7.36887	7.69142		7.12081	9.7168		5.89595	7.36928		7.11231	7.77739
YLR281C		7.24097	9.69601	7.23951	7.41232	9.40678	6.11971	8.27645	7.67977		7.41232	7.78673		7.24097	9.69601		6.11971	7.23514		6.69727	7.40299
YLR283W		7.40845	8.1653	7.67722	8.30692	9.0319	8.09808	9.19357	9.19829		8.30692	8.75927		7.40845	8.1653		8.09808	8.93513		8.0985	8.60296
YLR282C		7.22704	8.33289	5.00161	7.71367	8.65105	7.55249	9.19584	9.23002		7.71367	8.18384		7.22704	8.33289		7.55249	8.31172		6.92739	7.07789
YLR284C		7.108	10.347	6.90004	7.80605	8.62914	7.22969	8.27281	8.82737		7.80605	8.46727		7.108	10.347		7.22969	8.32474		6.91536	7.4715
YLR285W		10.5201	9.23816	10.7865	10.1603	10.1013	10.6728	8.42511	8.4803		10.1603	9.40539		10.5201	9.23816		10.6728	9.97225		10.4518	10.3919
YLR285C-A		12.1307	10.4387	9.24753	9.17005	10.1623	11.1546	9.86326	9.79169		9.17005	8.94423		12.1307	10.4387		11.1546	9.73725		12.1837	12.1814
YLR286W-A		15.1852	13.7378	8.80932	11.1021	13.2141	15.3826	13.3062	13.3766		11.1021	11.4964		15.1852	13.7378		15.3826	14.2017		13.9377	14.126
YLR286C		14.4171	13.0703	12.3111	10.2333	12.6633	14.6656	12.7955	12.7753		10.2333	10.618		14.4171	13.0703		14.6656	13.5015		13.5176	13.5802
YLR287C		9.31385	8.42488	10.5861	9.96593	8.88148	10.0575	7.43822	7.12301		9.96593	8.49138		9.31385	8.42488		10.0575	8.80154		9.69959	9.58963
YLR287C-A		14.2858	12.9124	15.2785	13.5729	13.6448	14.5036	10.6532	11.4067		13.5729	12.7207		14.2858	12.9124		14.5036	12.999		13.2097	13.4189
YLR288C		7.75946	8.1025	8.425	7.66105	8.20786	8.1422	7.62237	8.1992		7.66105	7.67527		7.75946	8.1025		8.1422	7.89018		7.95596	7.89347
YLR289W		5.86331	6.66812	7.55221	6.50942	7.32112	6.34951	7.54133	7.73066		6.50942	7.0043		5.86331	6.66812		6.34951	6.68112		7.36349	7.42148
YLR290C		8.27592	9.80726	8.54198	8.57311	9.79887	8.95388	9.72921	10.4874		8.57311	9.26421		8.27592	9.80726		8.95388	10.1634		9.12963	9.16108
YLR291C		10.7778	9.82746	10.8249	10.5446	9.34683	10.9969	9.15565	8.95234		10.5446	9.86042		10.7778	9.82746		10.9969	10.0403		10.7425	10.6859
YLR292C		10.342	9.89413	11.2093	10.6784	10.442	10.897	9.7371	10.5049		10.6784	10.3592		10.342	9.89413		10.897	11.1376		10.4662	10.6225
YLR293C		14.5207	12.4028	14.1527	13.6431	12.7779	14.3509	12.3737	12.1575		13.6431	12.4595		14.5207	12.4028		14.3509	13.3958		13.9752	13.9659
YLR294C		10.8249	12.2399	11.5762	10.7673	10.5444	10.1667	10.3096	10.5138		10.7673	10.6603		10.8249	12.2399		10.1667	10.6055		10.9939	11.2607
YLR295C		11.6867	13.1472	12.6191	11.4606	11.337	11.1735	11.2902	11.4051		11.4606	11.3423		11.6867	13.1472		11.1735	11.7162		11.2208	11.3406
YLR296W		4.19355	5.97485	4.56631	3.67404	4.92051	3.17665	3.85115	2.45552		3.67404	2.11412		4.19355	5.97485		3.17665	3.54997		3.82217	3.75028
YLR297W		10.0571	10.7714	7.76557	11.5686	10.3557	8.43418	12.8725	13.2519		11.5686	8.37957		10.0571	10.7714		8.43418	11.0148		8.1827	8.79988
YLR298C		8.1025	8.93363	9.92346	8.62645	9.65283	8.10883	9.28492	8.93178		8.62645	8.43584		8.1025	8.93363		8.10883	8.72698		9.12469	8.94589
YLR299W		7.7776	9.55677	7.96981	9.12247	8.20081	8.19436	10.7462	9.5763		9.12247	8.93428		7.7776	9.55677		8.19436	10.1732		8.55277	8.57623
YLR299C-A		9.32947	10.6402	6.3803	10.3209	8.98941	8.78475	11.4725	10.3988		10.3209	10.1179		9.32947	10.6402		8.78475	10.9721		9.22112	9.65173
YLR300W		14.2839	13.5105	12.9225	13.245	14.1543	13.4617	13.7685	13.897		13.245	12.0066		14.2839	13.5105		13.4617	12.6678		12.9708	13.0264
YLR301W		11.3885	10.0563	12.2344	11.2605	11.4178	12.0543	10.2882	11.0013		11.2605	11.2189		11.3885	10.0563		12.0543	12.5685		12.0024	12.0049
YLR303W		11.6083	10.6221	13.3595	11.3879	15.5057	-0.3948	9.78746	10.8407		11.3879	8.90243		11.6083	10.6221		-0.3948	-0.68815		0.640691	0.568802
YLR302C		9.69881	8.80707	7.12876	8.47289	12.781	1.484	7.25506	7.844		8.47289	5.82142		9.69881	8.80707		1.484	1.19065		2.51949	2.4476
YLR304C		12.2811	14.1779	11.6035	11.4318	11.2964	11.9333	13.5579	13.4961		11.4318	11.8123		12.2811	14.1779		11.9333	12.9722		11.6328	11.8935
YLR305C		9.14318	8.40995	8.79141	9.13502	7.39034	9.55153	9.74742	9.62837		9.13502	8.74778		9.14318	8.40995		9.55153	8.54005		8.48245	8.5433
YLR306W		7.95055	7.60581	8.6566	8.81614	9.21411	8.01505	6.33599	7.65918		8.81614	8.46521		7.95055	7.60581		8.01505	8.00185		7.89197	8.26487
YLR307W		3.79933	7.70933	5.46457	4.20382	9.03348	4.25838	2.70286	-0.0147		4.20382	3.73136		3.79933	7.70933		4.25838	5.84121		3.93691	3.60199
YLR309C		7.22704	6.78703	9.62555	7.4932	8.56389	8.44166	7.86326	8.44745		7.4932	7.77393		7.22704	6.78703		8.44166	8.36768		9.75182	9.85675
YLR310C		8.47974	8.49558	8.768	8.39688	8.35766	9.25045	9.74316	9.4383		8.39688	8.31156		8.47974	8.49558		9.25045	8.89554		8.87143	8.65349
YLR311C		5.47223	9.88646	4.55252	3.72174	7.70444	2.64621	8.55577	8.80867		3.72174	5.77921		5.47223	9.88646		2.64621	5.51848		5.0543	4.66049
YLR312C		4.98245	11.1047	4.27025	3.33803	8.50439	3.95771	10.2353	10.6569		3.33803	6.34009		4.98245	11.1047		3.95771	7.36391		4.95011	4.46319
YLR312W-A		8.34994	8.82583	10.7776	9.03248	9.40786	8.79989	7.88804	8.83865		9.03248	9.07726		8.34994	8.82583		8.79989	8.80768		9.7766	9.7441
YLR313C		6.24695	7.43506	7.60386	7.00436	7.91742	7.27712	6.25327	6.26917		7.00436	6.99966		6.24695	7.43506		7.27712	7.32945		7.21021	7.40841
YLR314C		10.2516	9.0558	11.5223	9.69924	10.0202	10.1532	8.6221	9.78822		9.69924	9.47142		10.2516	9.0558		10.1532	9.84434		11.179	11.109
YLR315W		9.27866	9.23015	8.09716	8.3613	8.11243	8.32384	8.65633	7.88765		8.3613	8.68161		9.27866	9.23015		8.32384	8.44103		7.783	7.74353
YLR317W		9.75848	9.69828	8.4825	9.42621	9.56629	9.62989	9.02439	8.92644		9.42621	9.45895		9.75848	9.69828		9.62989	9.12548		9.29309	9.33856
YLR316C		9.52646	9.45228	10.1957	9.22589	9.32967	9.41725	8.83132	8.80999		9.22589	9.14468		9.52646	9.45228		9.41725	8.87235		9.05852	9.00371
YLR318W		6.00011	6.38971	6.92463	6.76747	7.337	6.81674	5.77231	5.98107		6.76747	6.95231		6.00011	6.38971		6.81674	5.50697		7.16714	6.89886
YLR319C		8.00722	7.75867	8.77023	8.15819	7.93963	8.46385	7.33084	7.69258		8.15819	8.21262		8.00722	7.75867		8.46385	8.53387		8.49395	8.46444
YLR320W		7.20127	6.64072	6.67327	7.14585	6.49848	7.5394	7.38399	7.36076		7.14585	7.07507		7.20127	6.64072		7.5394	6.94625		7.18684	7.02289
YLR322W		7.83467	7.80095	4.62025	7.59587	8.65379	8.20007	7.19049	7.12417		7.59587	7.68376		7.83467	7.80095		8.20007	7.47097		8.08556	8.05215
YLR321C		8.85781	8.13834	9.52441	8.36377	8.97543	9.05031	7.43583	7.35598		8.36377	8.16797		8.85781	8.13834		9.05031	7.85418		9.49251	9.3914
YLR323C		8.07872	8.1507	9.68832	7.98667	9.18278	8.5273	8.12053	8.29937		7.98667	7.74258		8.07872	8.1507		8.5273	7.57613		8.55667	8.21034
YLR324W		8.9041	9.96467	8.44397	9.5902	9.09452	9.1671	9.78436	10.5307		9.5902	10.2171		8.9041	9.96467		9.1671	10.7708		9.21515	9.32109
YLR325C		16.2276	14.1058	17.0022	15.8523	14.4995	16.5097	10.893	12.0415		15.8523	14.2743		16.2276	14.1058		16.5097	13.1026		15.0724	15.1148
YLR326W		7.14704	8.7241	8.7375	8.44581	8.76625	7.50376	8.81497	9.34973		8.44581	8.2823		7.14704	8.7241		7.50376	8.07874		8.37791	8.67167
YLR329W		5.69924	5.08484	4.11856	6.85855	6.2207	5.86158	6.67018	5.49962		6.85855	6.42126		5.69924	5.08484		5.86158	6.63382		6.07486	6.05742
YLR330W		10.2653	9.68572	11.3341	9.86689	9.96884	10.3041	9.69156	10.0704		9.86689	9.91992		10.2653	9.68572		10.3041	10.6911		10.6554	10.7427
YLR332W		10.9565	10.305	9.8961	11.5022	8.92348	10.8612	11.525	11.7219		11.5022	10.5635		10.9565	10.305		10.8612	10.668		9.8553	9.65353
YLR331C		10.8413	10.2016	4.28122	11.3173	8.93656	10.7997	11.7229	11.9658		11.3173	10.3645		10.8413	10.2016		10.7997	10.62		9.98812	9.7211
YLR333C		14.6415	12.8352	15.3549	13.9899	13.3086	14.8357	11.1458	12.1128		13.9899	12.304		14.6415	12.8352		14.8357	12.4135		14.3075	14.3329
YLR334C		3.89705	3.80987	4.34581	4.8865	6.03116	3.53514	7.35857	7.50181		4.8865	3.98108		3.89705	3.80987		3.53514	3.81107		2.44967	2.52978
YLR335W		10.0085	8.59374	10.9856	9.54456	9.41944	10.1387	9.14646	9.21668		9.54456	8.86974		10.0085	8.59374		10.1387	9.14142		10.7286	10.5482
YLR336C		8.28009	7.34623	9.53003	8.74166	7.63532	9.18378	7.43491	7.12073		8.74166	6.49898		8.28009	7.34623		9.18378	6.54995		8.8237	8.72428
YLR338W		8.24352	8.33706	3.96711	7.61863	7.51269	8.05763	9.8236	9.78835		7.61863	8.95005		8.24352	8.33706		8.05763	8.99474		8.85675	8.65322
YLR337C		9.31568	9.27005	9.1538	8.4401	7.98757	8.88855	10.1045	10.156		8.4401	9.71662		9.31568	9.27005		8.88855	9.73495		9.55465	9.21102
YLR340W		16.9618	14.6559	15.9949	16.1586	13.4346	16.7957	11.6703	11.7163		16.1586	14.6254		16.9618	14.6559		16.7957	14.3003		15.5795	15.4967
YLR339C		16.8318	14.6012	7.52033	15.6233	13.0679	16.3828	11.1028	11.2624		15.6233	14.1305		16.8318	14.6012		16.3828	13.8203		15.162	15.0888
YLR341W		6.37676	4.34217	3.30211	7.22224	5.44698	6.50258	6.51288	4.27703		7.22224	6.94722		6.37676	4.34217		6.50258	6.07		6.08181	6.20256
YLR342W		12.2322	9.84014	11.6101	12.3246	9.33363	12.8354	12.7075	12.4571		12.3246	11.1172		12.2322	9.84014		12.8354	11.43		11.0378	11.0168
YLR342W-A		11.3516	8.54602	9.52084	10.0371	7.82014	9.85268	9.82744	9.71445		10.0371	8.85721		11.3516	8.54602		9.85268	8.39002		9.70965	10.0003
YLR343W		7.35011	5.67836	5.745	6.18623	7.98783	9.3691	7.03955	5.37155		6.18623	6.69114		7.35011	5.67836		9.3691	9.14791		8.07875	8.03615
YLR344W		14.2791	12.2286	14.7615	13.41	12.3377	13.7547	10.2754	10.555		13.41	11.5876		14.2791	12.2286		13.7547	10.6769		13.0606	13.074
YLR345W		7.91327	10.35	7.84785	8.71184	9.0974	7.23237	9.85139	10.6184		8.71184	10.2314		7.91327	10.35		7.23237	10.3116		8.79076	8.8948
YLR346C		4.86531	9.17208	8.30271	8.64754	8.7728	8.34478	9.27783	9.87771		8.64754	7.04277		4.86531	9.17208		8.34478	9.67805		8.89521	8.30547
YLR347W-A		10.8572	10.5158	6.77991	11.0873	8.67068	11.4407	11.8849	11.4733		11.0873	10.694		10.8572	10.5158		11.4407	10.2284		10.2452	10.0513
YLR347C		10.3678	9.96032	10.3496	10.5448	8.14918	10.7644	11.3676	10.7791		10.5448	10.1385		10.3678	9.96032		10.7644	9.59727		9.513	9.4464
YLR349W		8.74401	10.9985	5.4133	8.89932	12.1501	10.4903	9.63631	9.39647		8.89932	8.88657		8.74401	10.9985		10.4903	8.45032		9.36939	9.5688
YLR348C		9.22601	11.2644	11.2664	9.20007	12.4895	10.843	9.74627	9.38125		9.20007	9.1799		9.22601	11.2644		10.843	8.77864		10.2521	10.4186
YLR350W		11.6792	12.3253	10.7404	12.4695	11.0106	11.2865	12.8974	13.0922		12.4695	13.3013		11.6792	12.3253		11.2865	12.2917		10.0431	10.2407
YLR351C		10.8576	10.8364	11.1817	10.4218	10.9313	11.2454	10.3122	10.7507		10.4218	10.7866		10.8576	10.8364		11.2454	11.5714		10.7603	10.9743
YLR352W		7.88119	8.85887	7.07241	7.96193	7.57639	7.88533	9.34699	8.75532		7.96193	8.93145		7.88119	8.85887		7.88533	8.54048		7.66007	7.85461
YLR353W		8.98112	8.49933	8.58258	8.92765	8.00693	9.19928	7.97712	8.2868		8.92765	9.09666		8.98112	8.49933		9.19928	7.8586		8.70068	8.61545
YLR354C		13.6345	13.1623	13.5209	13.7043	13.992	13.2521	13.5916	13.9364		13.7043	13.6802		13.6345	13.1623		13.2521	13.1056		13.4548	13.4314
YLR355C		14.5513	13.5811	15.2472	13.1497	14.5276	15.3387	12.8578	12.123		13.1497	12.0556		14.5513	13.5811		15.3387	10.9823		13.8688	13.6789
YLR356W		10.3702	13.2908	8.84707	8.74833	10.313	9.36768	10.9886	10.7416		8.74833	10.5613		10.3702	13.2908		9.36768	11.6698		9.14091	9.30696
YLR357W		8.43408	7.68324	9.15049	8.16105	8.65239	8.45124	7.73157	7.5267		8.16105	8.31647		8.43408	7.68324		8.45124	7.78575		9.11011	9.02914
YLR358C		9.38923	8.32262	5.07239	8.71545	9.20578	9.02004	8.24465	8.2005		8.71545	9.06581		9.38923	8.32262		9.02004	8.22979		9.79732	9.61493
YLR359W		14.4153	10.9147	11.4408	13.9266	11.9128	13.1496	10.3527	10.262		13.9266	13.4556		14.4153	10.9147		13.1496	11.097		12.4352	12.3331
YLR360W		8.73366	8.73126	8.33542	8.50007	8.72171	8.98508	8.52097	9.05521		8.50007	8.84914		8.73366	8.73126		8.98508	9.23817		8.99882	9.10779
YLR361C		8.91015	9.16637	8.20872	8.44471	7.93762	9.09212	9.09655	9.30603		8.44471	8.73693		8.91015	9.16637		9.09212	9.16883		8.53188	8.36341
YLR361C-A		9.50944	9.59849	10.1008	8.78556	9.43133	9.19463	9.2379	9.90723		8.78556	8.85286		9.50944	9.59849		9.19463	9.71967		9.66144	9.722
YLR362W		7.77408	7.94471	7.9743	7.9845	8.15088	7.77551	8.77895	8.93676		7.9845	8.03922		7.77408	7.94471		7.77551	9.12769		7.86407	7.96136
YLR363C		10.2218	9.37514	8.92064	9.0197	8.83047	9.55891	8.4884	8.05625		9.0197	9.71762		10.2218	9.37514		9.55891	10.0624		9.23342	8.99161
YLR363W-A		11.2153	9.26418	12.0404	10.5706	9.87195	11.2627	7.97443	7.3824		10.5706	8.64091		11.2153	9.26418		11.2627	7.79918		10.1865	9.97485
YLR364W		8.32102	9.21557	9.17287	8.85857	10.7429	8.99567	7.26424	7.70913		8.85857	8.61665		8.32102	9.21557		8.99567	8.4193		8.33256	8.32207
YLR365W		4.09131	4.00414	4.54008	4.23277	4.3254	4.28877	5.91238	4.01425		4.23277	3.99478		4.09131	4.00414		4.28877	3.66208		4.79594	3.72405
YLR366W		8.11124	8.13181	7.39904	4.6958	4.71774	4.62538	5.64735	5.35863		4.6958	3.91032		8.11124	8.13181		4.62538	4.62001		2.76593	2.69404
YLR364C-A		5.52818	5.441	5.90094	2.76274	3.90444	3.42931	5.58371	4.45111		2.76274	3.10972		5.52818	5.441		3.42931	3.76562		4.0808	4.00891
YLR367W		13.1076	11.6442	13.7001	12.4032	10.5363	12.6976	9.54065	10.4057		12.4032	10.7058		13.1076	11.6442		12.6976	11.5212		12.3685	12.4495
YLR368W		7.85173	8.31658	8.28622	8.14773	8.26477	8.46437	8.6361	9.29764		8.14773	8.55601		7.85173	8.31658		8.46437	9.03695		8.11883	8.13126
YLR369W		7.40371	8.08826	8.72761	8.09262	8.53711	7.9542	8.52885	8.62497		8.09262	8.45036		7.40371	8.08826		7.9542	8.49548		8.63355	8.62005
YLR370C		11.6378	12.0493	11.6919	11.1911	11.161	11.4175	11.3438	11.4167		11.1911	11.6246		11.6378	12.0493		11.4175	11.9905		11.0694	11.0626
YLR371W		8.39832	8.39199	7.98809	8.12454	7.68324	8.69759	9.17023	9.10059		8.12454	8.86196		8.39832	8.39199		8.69759	8.38451		8.19538	8.15666
YLR372W		13.7209	11.1211	12.6611	12.9826	10.8735	13.7219	8.48391	8.17709		12.9826	10.9358		13.7209	11.1211		13.7219	10.479		12.1802	12.1753
YLR373C		8.41822	7.91344	8.50131	8.78662	7.57016	8.42549	8.02635	7.88852		8.78662	8.64133		8.41822	7.91344		8.42549	7.45172		8.43515	8.46636
YLR375W		11.5828	11.5835	10.3679	12.2712	10.6577	10.9802	11.3191	11.7484		12.2712	11.6767		11.5828	11.5835		10.9802	11.0879		9.93888	10.058
YLR374C		10.5871	10.7227	6.84158	10.4784	9.24137	9.2381	10.3651	10.7347		10.4784	10.1569		10.5871	10.7227		9.2381	9.39268		7.42597	7.85365
YLR376C		6.63512	7.94219	8.15114	6.90284	8.27947	7.18326	6.69452	7.08025		6.90284	7.56852		6.63512	7.94219		7.18326	7.21158		7.75301	8.08551
YLR377C		7.62906	14.4992	3.6799	7.25064	7.13746	7.137	7.6721	6.34648		7.25064	7.78395		7.62906	14.4992		7.137	7.91098		5.78713	6.11578
YLR379W		12.9776	12.3969	5.95367	12.6474	10.1533	12.7159	11.7542	11.5719		12.6474	12.216		12.9776	12.3969		12.7159	12.2409		11.7383	11.6161
YLR378C		13.0469	12.19	11.8413	12.7228	10.1145	12.7934	11.8477	11.7096		12.7228	12.3383		13.0469	12.19		12.7934	12.311		11.7201	11.6448
YLR380W		10.7855	9.88863	11.0003	10.2493	9.9017	10.5311	10.2765	9.52073		10.2493	10.2521		10.7855	9.88863		10.5311	9.8142		10.2136	10.1801
YLR381W		8.37586	8.85962	7.53702	8.72413	7.5504	8.30667	7.01856	6.33343		8.72413	8.84749		8.37586	8.85962		8.30667	8.2826		7.60988	7.74702
YLR382C		7.22687	7.81668	8.39441	7.80239	7.56203	7.71714	9.00465	8.68358		7.80239	8.35327		7.22687	7.81668		7.71714	8.61403		8.37333	8.55507
YLR383W		6.57191	6.33124	8.48242	6.93851	6.94428	7.73212	6.83636	6.72293		6.93851	6.59868		6.57191	6.33124		7.73212	7.10534		8.18863	8.54792
YLR384C		9.97151	8.48949	9.92384	9.58922	8.17405	10.4006	9.35052	9.10167		9.58922	8.28001		9.97151	8.48949		10.4006	8.34408		9.52477	9.42122
YLR385C		5.77493	5.22295	7.75889	6.3318	6.30351	7.7885	7.05591	6.25589		6.3318	5.14895		5.77493	5.22295		7.7885	6.31342		7.05864	6.71111
YLR386W		8.13639	8.13403	8.45922	8.11126	7.70926	8.48342	8.49455	8.52817		8.11126	8.14438		8.13639	8.13403		8.48342	8.63052		8.53868	8.32793
YLR387C		9.44472	9.377	10.3428	10.2001	9.68254	9.72878	9.57192	9.78628		10.2001	10.3182		9.44472	9.377		9.72878	11.5319		9.99452	9.955
YLR388W		15.079	13.2208	15.9766	15.1208	14.2627	15.3049	9.47294	10.4515		15.1208	13.4263		15.079	13.2208		15.3049	12.4768		14.599	14.6156
YLR389C		9.97142	9.4643	9.08667	9.93205	8.59895	9.84083	10.0295	9.94727		9.93205	9.78413		9.97142	9.4643		9.84083	9.42526		9.23758	9.23906
YLR390W		9.00153	9.77394	9.90999	9.48994	9.79051	8.86826	10.2545	10.3164		9.48994	9.503		9.00153	9.77394		8.86826	9.58772		9.27797	9.2982
YLR390W-A		14.1563	13.9365	13.8343	13.6099	12.9642	14.0482	14.9671	14.7923		13.6099	13.2138		14.1563	13.9365		14.0482	13.6853		12.6746	12.6606
YLR392C		7.20294	8.31257	7.33983	7.92248	8.01304	6.91383	9.37946	7.87654		7.92248	8.34148		7.20294	8.31257		6.91383	8.5268		7.72051	7.58634
YLR393W		7.75258	8.5443	8.24065	7.72572	7.48985	7.63051	9.61417	8.9862		7.72572	8.40228		7.75258	8.5443		7.63051	8.12303		7.43835	7.94377
YLR394W		8.16026	8.94516	7.53503	7.98741	7.50153	8.08507	9.25612	8.61844		7.98741	8.7313		8.16026	8.94516		8.08507	8.0713		8.3111	8.17244
YLR395C		12.4203	14.12	12.8539	12.5643	10.2475	11.3094	12.0854	12.5319		12.5643	12.5119		12.4203	14.12		11.3094	11.3744		11.0481	11.2426
YLR396C		7.88387	8.25512	8.0979	8.47112	8.03585	8.38297	7.8747	7.75774		8.47112	8.74402		7.88387	8.25512		8.38297	8.98553		8.3156	8.12823
YLR397C		9.75812	8.03411	9.72907	9.18266	7.9	9.55481	8.19007	7.32533		9.18266	7.76097		9.75812	8.03411		9.55481	7.8781		8.92954	8.72947
YLR398C		8.37949	7.64885	8.93175	8.18812	7.7775	8.87833	8.25276	7.91793		8.18812	8.36877		8.37949	7.64885		8.87833	8.84529		9.06357	8.88452
YLR399W-A		9.15438	9.67495	7.20521	9.19068	11.1829	9.75887	10.1483	10.4695		9.19068	9.37507		9.15438	9.67495		9.75887	8.41744		10.6509	10.2221
YLR399C		9.14821	8.90696	10.8475	8.64011	10.8722	9.5875	9.56367	9.91783		8.64011	9.06963		9.14821	8.90696		9.5875	8.01761		10.5893	10.509
YLR400W		7.90388	6.60022	5.43439	8.10653	6.57069	8.44711	5.48548	3.50489		8.10653	5.60089		7.90388	6.60022		8.44711	6.41228		8.24077	7.96957
YLR401C		9.75205	8.52538	10.3761	9.43704	8.27549	9.72854	6.5822	5.43776		9.43704	6.85839		9.75205	8.52538		9.72854	7.50701		9.63076	9.3947
YLR402W		8.33022	9.15737	8.89914	8.05103	8.60226	8.65183	10.4138	10.5944		8.05103	6.16771		8.33022	9.15737		8.65183	7.86911		6.76028	6.51847
YLR403W		9.8396	9.65019	9.14325	9.69467	8.61752	9.64001	10.9264	10.9416		9.69467	10.1964		9.8396	9.65019		9.64001	9.36433		9.07939	9.0343
YLR404W		8.96283	8.69737	8.2897	8.65913	8.1882	8.54026	6.01405	6.72204		8.65913	8.7182		8.96283	8.69737		8.54026	8.38276		8.39627	8.46712
YLR405W		9.53355	8.34522	9.88305	9.3255	8.50506	9.5518	7.03829	6.55812		9.3255	8.28652		9.53355	8.34522		9.5518	7.39486		9.72857	9.56476
YLR406C		13.8166	11.7352	15.0542	13.2007	12.1753	13.8471	7.29532	7.29499		13.2007	10.6763		13.8166	11.7352		13.8471	10.395		12.9424	12.9153
YLR406C-A		5.24188	5.3067	5.76664	4.47644	5.47979	4.16263	5.78283	4.57985		4.47644	3.82341		5.24188	5.3067		4.16263	3.91995		4.9465	5.45957
YLR407W		9.6429	9.68233	10.4636	9.54201	11.0947	10.0069	9.67495	8.46665		9.54201	9.49431		9.6429	9.68233		10.0069	8.41316		9.64597	9.56191
YLR408C		7.25618	8.85478	6.26046	6.98513	8.10744	6.63678	7.55946	8.28119		6.98513	8.68798		7.25618	8.85478		6.63678	7.66142		8.13969	7.70524
YLR409C		10.0989	7.74201	10.7632	9.72659	7.98965	10.6708	7.88492	5.16737		9.72659	7.23581		10.0989	7.74201		10.6708	6.6041		9.62073	9.36134
YLR410W		9.79744	8.86093	9.94669	8.91011	8.61422	9.86548	8.93142	8.85366		8.91011	8.65566		9.79744	8.86093		9.86548	9.50235		9.04876	9.00945
YLR411W		8.06476	7.78856	6.98027	9.68424	7.25872	7.11812	8.29293	6.67988		9.68424	9.05752		8.06476	7.78856		7.11812	7.5013		7.25645	6.5538
YLR412W		9.65747	8.45987	9.99852	9.81871	9.82219	10.0959	8.56044	8.41504		9.81871	9.36867		9.65747	8.45987		10.0959	10.0987		9.53146	9.59509
YLR412C-A		5.42921	4.69003	5.22597	3.01177	5.67413	2.39567	2.35881	3.70014		3.01177	4.35874		5.42921	4.69003		2.39567	2.76899		3.48183	3.40994
YLR413W		13.2008	6.96849	12.0916	12.3709	12.4331	12.822	11.7081	11.7129		12.3709	11.6945		13.2008	6.96849		12.822	8.08355		11.4068	11.1877
YLR414C		10.9951	11.2685	9.82516	13.1873	10.1853	10.4989	12.3911	11.3278		13.1873	13.3415		10.9951	11.2685		10.4989	11.5751		9.84517	10.0814
YLR415C		6.671	7.43773	5.59032	8.28311	6.31436	5.45042	8.00861	6.53281		8.28311	8.01632		6.671	7.43773		5.45042	6.11546		2.77018	5.02022
YLR416C		4.69893	6.29895	5.35522	6.40486	6.05008	5.00085	7.42203	6.59469		6.40486	6.79281		4.69893	6.29895		5.00085	5.61423		4.53507	4.46319
YLR417W		7.74722	8.03919	8.3822	8.80043	8.39377	7.98613	9.15337	9.21221		8.80043	9.83609		7.74722	8.03919		7.98613	8.5502		8.13664	8.08551
YLR418C		9.33233	9.23459	9.96798	9.30721	9.05786	9.47342	7.89815	8.13693		9.30721	9.44327		9.33233	9.23459		9.47342	9.86652		9.56076	9.73877
YLR419W		7.5818	6.59611	8.34599	7.63808	6.80935	7.88842	5.95804	5.4012		7.63808	6.79107		7.5818	6.59611		7.88842	6.05721		8.182	7.99352
YLR420W		10.7296	9.58841	10.4961	12.2488	10.5868	12.3604	9.56291	9.1298		12.2488	11.2737		10.7296	9.58841		12.3604	10.5896		11.174	11.0942
YLR421C		11.2658	10.8649	11.622	11.785	11.1489	11.6349	10.8065	11.7055		11.785	11.5132		11.2658	10.8649		11.6349	12.6133		11.3346	11.3402
YLR422W		7.47087	7.63915	7.40754	7.60027	6.90125	7.91307	9.2947	8.56093		7.60027	8.06536		7.47087	7.63915		7.91307	7.42477		7.67655	7.60184
YLR423C		5.86878	6.75438	6.91207	7.91875	8.01918	7.08271	8.0361	8.84502		7.91875	7.71216		5.86878	6.75438		7.08271	7.35258		7.58344	7.69375
YLR424W		6.80798	6.50856	7.63889	7.61644	6.96135	7.20369	6.9889	7.32012		7.61644	7.13547		6.80798	6.50856		7.20369	6.73577		7.75734	7.54068
YLR425W		6.97894	7.26956	6.86792	6.86518	7.27657	7.14941	7.50936	7.135		6.86518	7.32682		6.97894	7.26956		7.14941	6.93635		7.50867	7.34523
YLR426W		9.53185	9.17949	8.56127	8.81608	8.81926	9.11495	8.26341	7.65239		8.81608	9.31937		9.53185	9.17949		9.11495	9.09876		8.25534	8.42206
YLR427W		8.80634	8.56179	9.18017	8.8607	9.3637	8.9416	8.3272	8.97309		8.8607	8.76826		8.80634	8.56179		8.9416	9.12202		9.15438	8.91946
YLR429W		10.3637	9.51946	11.4073	10.9936	10.0868	10.736	9.21897	9.36783		10.9936	10.4638		10.3637	9.51946		10.736	11.1528		10.8058	10.8136
YLR428C		9.35095	8.85896	5.85749	9.81784	9.11352	9.4175	8.23328	8.2111		9.81784	9.40314		9.35095	8.85896		9.4175	9.87633		9.04865	9.01283
YLR430W		8.71913	7.65185	8.85633	8.56151	7.02022	9.05539	8.82837	8.56106		8.56151	8.15559		8.71913	7.65185		9.05539	7.38233		8.42624	8.16418
YLR431C		7.47297	8.283	7.61901	7.66443	7.95085	7.1152	6.82621	6.55703		7.66443	8.09056		7.47297	8.283		7.1152	7.71073		7.74109	7.57456
YLR432W		13.2886	10.98	11.7148	12.3131	11.451	12.4893	9.05148	6.9182		12.3131	11.1732		13.2886	10.98		12.4893	9.63258		12.0189	11.905
YLR433C		9.48793	8.99162	8.58594	9.35528	8.29827	9.33983	8.59571	8.73018		9.35528	9.02182		9.48793	8.99162		9.33983	8.76142		8.88176	8.94388
YLR435W		10.2378	8.19924	11.9056	10.042	9.43775	10.7915	7.06212	5.85913		10.042	8.1027		10.2378	8.19924		10.7915	7.59978		10.2614	10.3672
YLR434C		9.18044	7.68027	5.3345	7.92119	7.5227	7.94067	5.7068	5.47163		7.92119	6.62377		9.18044	7.68027		7.94067	5.82601		4.91228	4.51847
YLR436C		8.49473	9.03891	7.90255	8.3261	7.58691	8.51174	9.69483	8.51383		8.3261	9.17335		8.49473	9.03891		8.51174	8.12435		8.83058	8.67589
YLR437C		11.113	10.0892	10.4034	9.92148	11.9423	10.4843	10.6539	10.3048		9.92148	10.1246		11.113	10.0892		10.4843	9.84993		9.80039	9.86177
YLR438W		8.94419	13.1251	8.62923	7.11007	9.93731	10.3589	12.6527	11.5973		7.11007	8.62368		8.94419	13.1251		10.3589	10.0455		9.55601	9.45603
YLR437C-A		8.58229	13.2412	5.08657	6.93846	9.85939	10.1283	12.5237	11.4311		6.93846	8.24909		8.58229	13.2412		10.1283	9.90932		9.07035	8.97098
YLR438C-A		10.2577	10.6605	12.7541	10.4032	11.5798	10.4385	9.38487	9.73748		10.4032	9.98291		10.2577	10.6605		10.4385	9.92037		11.2174	11.344
YLR439W		8.92592	9.68387	10.5475	8.74527	8.71581	8.69409	9.58281	8.45252		8.74527	9.4948		8.92592	9.68387		8.69409	8.57716		9.78413	9.63948
YLR440C		8.03143	8.3318	8.59107	8.50349	8.10539	8.77113	7.16447	7.08295		8.50349	8.29021		8.03143	8.3318		8.77113	8.58223		9.03456	8.94766
YLR441C		14.9977	12.9555	15.9442	14.8221	13.6847	15.6307	10.3128	10.8712		14.8221	13.0972		14.9977	12.9555		15.6307	13.0063		15.0276	15.0187
YLR442C		7.26156	7.48297	8.14637	7.3613	7.55987	7.59866	6.48507	7.00622		7.3613	7.12829		7.26156	7.48297		7.59866	7.32874		7.94059	7.93203
YLR443W		9.54839	9.11971	9.16045	9.0495	8.83983	9.63849	8.14415	7.83099		9.0495	8.98387		9.54839	9.11971		9.63849	9.49933		8.75707	8.84232
YLR447C		12.7891	11.1892	12.6504	11.9086	11.7842	12.7459	11.8416	12.3384		11.9086	11.7171		12.7891	11.1892		12.7459	12.2117		12.0098	12.1566
YLR448W		13.8412	11.6991	14.3214	13.5896	11.2617	13.931	9.53659	9.95403		13.5896	11.6565		13.8412	11.6991		13.931	10.3724		13.4158	13.4373
YLR449W		11.6268	8.96072	12.5671	10.4137	9.27323	11.5354	8.38033	8.0851		10.4137	7.37505		11.6268	8.96072		11.5354	8.28339		11.7058	11.6749
YLR450W		10.1851	9.62995	8.07317	9.46412	8.6695	10.021	10.866	11.0592		9.46412	9.71117		10.1851	9.62995		10.021	9.93158		8.95843	8.79841
YLR451W		8.12426	7.57894	9.07781	8.62614	8.30217	8.73336	8.69845	8.31203		8.62614	7.92241		8.12426	7.57894		8.73336	7.48077		8.33672	8.13082
YLR452C		10.4019	7.15101	9.95941	10.0032	8.69732	10.5912	7.34511	6.75184		10.0032	10.2975		10.4019	7.15101		10.5912	9.65731		10.3061	10.5277
YLR453C		6.39987	6.26861	7.17509	7.45672	7.31419	7.41003	7.29376	7.32906		7.45672	6.99778		6.39987	6.26861		7.41003	7.12879		6.9152	7.01839
YLR454W		7.31797	7.55309	7.18022	7.49301	5.55775	7.85865	8.75039	8.76087		7.49301	8.5369		7.31797	7.55309		7.85865	8.34406		7.98661	8.03161
YLR455W		9.32348	8.66326	9.34263	8.44694	8.61111	9.19135	8.71982	8.62925		8.44694	8.68898		9.32348	8.66326		9.19135	8.28565		9.83355	9.93823
YLR456W		6.26193	7.54452	8.35853	7.7446	8.75256	6.89193	6.87059	7.40221		7.7446	8.20283		6.26193	7.54452		6.89193	7.05128		7.74377	7.79318
YLR458W		7.11369	7.48407	4.34581	7.40773	8.96313	7.40656	6.58485	7.55695		7.40773	7.15101		7.11369	7.48407		7.40656	7.17711		8.2741	7.77771
YLR457C		6.89897	7.60573	8.32694	7.55325	8.98461	7.57999	7.26319	8.18718		7.55325	7.55756		6.89897	7.60573		7.57999	7.70117		8.34524	8.09136
YLR459W		10.4978	9.71234	9.73626	9.92504	8.68556	10.5421	8.95073	8.88801		9.92504	10.2115		10.4978	9.71234		10.5421	9.60344		9.39091	9.33155
YML131W		8.25072	12.1769	8.75235	7.27348	9.62974	8.83215	12.829	13.3401		7.27348	12.564		8.25072	12.1769		8.83215	13.9231		9.01717	9.05805
YML130C		9.8771	9.51777	10.1655	12.4541	9.74283	10.4728	11.8997	12.0827		12.4541	10.9792		9.8771	9.51777		10.4728	11.7807		10.2157	10.1221
YML129C		10.394	11.0816	11.5044	8.71874	10.8927	9.91073	11.9654	12.6542		8.71874	9.54313		10.394	11.0816		9.91073	11.2834		10.2735	10.4021
YML128C		7.60571	14.1711	7.65877	8.51341	10.3353	8.10465	14.252	14.1409		8.51341	12.1562		7.60571	14.1711		8.10465	12.8065		8.98134	9.75125
YML127W		9.95531	9.32009	9.70535	9.99611	9.02134	9.90439	9.1262	8.65538		9.99611	10.5335		9.95531	9.32009		9.90439	10.1506		9.4823	9.39429
YML126C		13.158	12.0069	12.8451	13.9426	10.479	12.5614	13.5505	11.252		13.9426	13.475		13.158	12.0069		12.5614	11.7544		11.8115	11.6474
YML125C		12.1294	10.4116	11.8761	12.2105	10.3035	12.4918	10.0842	10.1061		12.2105	11.0886		12.1294	10.4116		12.4918	11.3013		11.5554	11.4597
YML124C		10.9251	9.45078	11.4373	11.0084	9.95747	11.1358	9.84009	10.0767		11.0084	10.7493		10.9251	9.45078		11.1358	11.0438		10.8514	10.86
YML123C		15.021	14.2811	14.3202	8.09055	9.73403	14.6318	13.9565	13.8369		8.09055	7.82984		15.021	14.2811		14.6318	11.2913		7.98314	7.86569
YML122C		5.34153	7.27655	5.92181	7.35078	7.74477	5.60279	6.63065	7.34354		7.35078	7.73911		5.34153	7.27655		5.60279	4.88379		7.8496	7.05334
YML121W		8.99458	9.68993	10.2228	9.50841	10.3692	9.29046	9.8143	10.3817		9.50841	9.48647		8.99458	9.68993		9.29046	9.36764		9.68896	9.60402
YML120C		9.65297	12.4067	9.43234	9.83063	8.52965	8.03971	11.6249	10.5574		9.83063	11.2778		9.65297	12.4067		8.03971	9.3391		9.06451	9.3105
YML119W		9.11274	9.23048	9.43778	8.48197	9.34625	8.88133	9.14675	10.1301		8.48197	7.78866		9.11274	9.23048		8.88133	7.16807		8.74317	8.74201
YML118W		4.45842	7.0093	4.51247	5.78116	6.8761	4.8589	9.02866	9.15957		5.78116	5.11848		4.45842	7.0093		4.8589	6.93421		5.73665	5.57987
YML117W		9.13948	9.03762	9.01337	9.70695	9.41116	9.22384	11.5628	11.8812		9.70695	9.48892		9.13948	9.03762		9.22384	10.461		9.37262	9.55858
YML116W-A		9.88093	9.59323	10.2399	10.2727	10.1073	9.92374	12.4246	12.6523		10.2727	10.096		9.88093	9.59323		9.92374	10.9388		10.122	10.4377
YML116W		9.84022	8.55218	8.47185	10.0696	9.79848	9.54647	8.3451	8.51611		10.0696	10.6414		9.84022	8.55218		9.54647	11.6175		8.45974	8.15476
YML115C		10.339	9.75293	10.0945	10.3095	8.99974	10.3874	8.9837	9.21018		10.3095	10.2219		10.339	9.75293		10.3874	9.5396		9.95053	10.0671
YML114C		8.90089	8.55321	9.31795	8.66905	9.21937	8.7981	8.10597	7.66115		8.66905	8.2569		8.90089	8.55321		8.7981	8.69074		9.01524	9.00913
YML113W		9.65514	9.11169	10.836	8.51344	9.49225	9.33651	8.52352	8.45846		8.51344	7.59826		9.65514	9.11169		9.33651	6.51984		9.7801	9.27956
YML112W		8.41399	8.68365	9.18963	8.74833	8.97218	8.42271	8.2379	8.11267		8.74833	8.81519		8.41399	8.68365		8.42271	9.12908		8.34182	8.4437
YML111W		8.67878	8.09713	8.88975	8.09022	8.31767	8.99038	8.5305	8.19523		8.09022	8.33159		8.67878	8.09713		8.99038	8.82721		9.05391	8.94287
YML110C		11.2845	11.7631	11.0709	10.5891	11.0662	11.2762	12.5501	12.9236		10.5891	10.8919		11.2845	11.7631		11.2762	12.0907		11.5245	11.6451
YML109W		7.44333	7.69872	7.89334	7.24901	7.42885	7.9212	7.30046	7.20057		7.24901	7.23601		7.44333	7.69872		7.9212	7.58087		8.07119	8.09679
YML108W		9.83201	9.25028	11.3558	10.5113	9.79981	10.6584	8.54963	9.42652		10.5113	8.72424		9.83201	9.25028		10.6584	8.77057		9.87366	9.66091
YML107C		8.6831	8.49114	8.13689	9.04289	9.12925	8.7503	7.5351	7.0156		9.04289	8.27072		8.6831	8.49114		8.7503	8.43059		8.45027	8.50549
YML106W		13.8332	12.0636	13.4605	13.2509	11.0113	13.6701	10.4793	10.3071		13.2509	11.7319		13.8332	12.0636		13.6701	11.735		12.4256	12.3267
YML105C		10.2539	9.38135	11.2698	10.1941	9.89147	10.2094	8.09116	8.26522		10.1941	9.59404		10.2539	9.38135		10.2094	9.66622		10.4494	10.4428
YML104C		8.18359	8.1056	8.17422	8.27421	7.32515	9.03871	7.48821	7.16896		8.27421	7.85193		8.18359	8.1056		9.03871	7.68119		8.34562	8.30076
YML103C		9.39489	8.36622	8.35449	9.04703	7.44789	9.62094	8.40462	7.68756		9.04703	8.88231		9.39489	8.36622		9.62094	8.88803		9.04662	8.86801
YML102W		9.57381	9.14848	9.79046	9.15674	8.87228	9.16848	9.03821	9.44434		9.15674	9.32288		9.57381	9.14848		9.16848	9.4718		9.01612	8.78458
YML101C-A		9.58711	9.20481	7.47506	9.39519	8.76928	9.17541	9.24014	9.60953		9.39519	9.50532		9.58711	9.20481		9.17541	9.54714		9.47715	9.49099
YML101C		10.3703	10.5087	10.3306	10.2121	9.62574	9.97471	9.59467	9.52594		10.2121	10.2225		10.3703	10.5087		9.97471	10.9257		9.9651	9.98455
YML100W-A		6.26472	6.59258	6.47652	5.84728	6.00122	6.25081	7.66824	7.61365		5.84728	6.06872		6.26472	6.59258		6.25081	6.60195		4.73238	5.98241
YML100W		8.31882	12.0439	7.46326	9.3329	8.96383	7.51517	14.7266	13.8623		9.3329	13.4727		8.31882	12.0439		7.51517	12.4003		9.93132	10.4636
YML099W-A		8.88977	7.97286	5.34562	8.73554	8.46709	8.29181	8.53842	8.46471		8.73554	8.32495		8.88977	7.97286		8.29181	7.91538		8.42371	8.49199
YML099C		8.24605	7.70136	8.41183	8.41277	8.46867	8.53793	8.13096	8.09534		8.41277	7.75305		8.24605	7.70136		8.53793	8.3478		8.2125	8.14061
YML098W		9.34559	9.76505	10.6719	9.44565	10.6622	9.79027	9.12788	9.31117		9.44565	9.1482		9.34559	9.76505		9.79027	9.33816		9.7372	9.78436
YML097C		8.04308	7.76377	9.71265	8.90467	9.11384	8.47404	7.06594	7.17831		8.90467	8.17457		8.04308	7.76377		8.47404	8.22999		9.06939	8.82241
YML096W		9.23624	8.48149	9.17002	9.61762	8.59116	9.46803	7.49928	6.7847		9.61762	8.30179		9.23624	8.48149		9.46803	8.00845		8.81822	8.74634
YML095C		7.98209	8.61808	7.839	8.44904	8.08421	7.82013	7.93166	7.73142		8.44904	8.28274		7.98209	8.61808		7.82013	8.03817		7.77615	7.86346
YML094W		9.90089	9.34374	11.3066	10.1952	9.51462	10.1829	8.10297	8.32775		10.1952	9.13432		9.90089	9.34374		10.1829	9.33071		9.78926	10.0756
YML094C-A		9.77716	9.40255	5.76841	9.76673	9.23838	9.91445	7.82003	7.96497		9.76673	8.79921		9.77716	9.40255		9.91445	9.12869		8.93366	9.35927
YML093W		8.99321	6.07886	11.5172	8.67938	8.354	9.92551	7.04873	5.48674		8.67938	5.71958		8.99321	6.07886		9.92551	5.12578		10.1828	10.0906
YML092C		12.122	11.5006	11.9401	12.4318	10.9302	11.6191	11.2214	10.744		12.4318	12.2891		12.122	11.5006		11.6191	13.1207		11.503	11.3413
YML091C		7.88177	10.1243	7.48174	7.60298	7.68438	6.85319	9.72788	8.87698		7.60298	8.60408		7.88177	10.1243		6.85319	10.0466		8.33235	8.46347
YML090W		5.52651	8.98571	4.32327	5.10907	6.87723	3.78172	8.30855	7.4023		5.10907	6.50043		5.52651	8.98571		3.78172	7.78047		6.16409	6.41413
YML089C		3.94322	8.76884	4.39198	2.76274	4.69982	1.51101	5.76428	4.28119		2.76274	3.52475		3.94322	8.76884		1.51101	2.95463		2.49584	3.57595
YML088W		8.77817	8.66269	9.55524	9.72949	8.79457	8.87256	8.80712	9.12209		9.72949	8.95382		8.77817	8.66269		8.87256	9.34515		8.78192	8.68335
YML087C		7.20116	9.6455	5.70544	7.92303	8.30887	7.04309	9.42207	9.67178		7.92303	8.41724		7.20116	9.6455		7.04309	9.09398		6.50979	6.39837
YML086C		11.3877	11.0229	10.2938	10.4185	9.12282	10.9189	9.22873	8.87901		10.4185	10.3875		11.3877	11.0229		10.9189	12.1338		10.5331	10.5089
YML085C		12.4442	11.3558	11.9568	11.6229	10.7255	11.7606	11.2798	10.8409		11.6229	11.5115		12.4442	11.3558		11.7606	11.7203		11.6852	11.6831
YML084W		4.27523	4.26405	4.724	2.75572	6.18178	3.25834	6.5178	3.85913		2.75572	2.19581		4.27523	4.26405		3.25834	4.40563		2.90386	2.67996
YML083C		6.72088	7.23904	4.49217	5.78453	9.69264	6.07507	10.3822	9.2357		5.78453	6.6391		6.72088	7.23904		6.07507	6.77464		5.68691	5.85206
YML082W		9.20462	8.21182	9.51257	9.32482	9.47829	8.66626	8.6971	9.12971		9.32482	8.29956		9.20462	8.21182		8.66626	7.0739		8.6211	8.55355
YML081C-A		12.605	14.4033	13.0276	12.1441	12.0853	11.6269	12.6724	13.6091		12.1441	11.6888		12.605	14.4033		11.6269	11.8402		11.6947	11.7815
YML081W		8.9868	8.16497	8.72593	8.76985	7.79634	9.43315	8.61356	8.34095		8.76985	8.55627		8.9868	8.16497		9.43315	7.64453		8.99208	8.75788
YML080W		8.64403	7.84838	10.5607	8.54212	8.15225	9.29386	7.46884	6.34127		8.54212	7.10858		8.64403	7.84838		9.29386	6.20212		9.01218	8.77923
YML079W		10.6394	10.746	10.6382	9.71001	9.69784	10.3224	9.96394	10.3599		9.71001	9.75157		10.6394	10.746		10.3224	11.1672		9.88634	9.9792
YML078W		12.6858	12.8957	11.6979	11.8067	11.0797	12.229	12.098	12.1169		11.8067	11.9176		12.6858	12.8957		12.229	12.6827		12.1421	12.1139
YML077W		9.53773	9.03712	10.6805	9.72169	9.81906	10.1649	8.16777	8.97859		9.72169	9.61837		9.53773	9.03712		10.1649	9.8386		9.66931	9.76639
YML076C		7.44675	7.68424	7.66758	7.08943	7.50515	7.72165	7.89251	7.88835		7.08943	8.01773		7.44675	7.68424		7.72165	7.58869		7.85593	7.88696
YML075C		10.7704	10.6899	10.3313	12.7545	6.99793	10.5752	12.4005	9.54536		12.7545	12.3167		10.7704	10.6899		10.5752	9.02734		9.18214	9.04529
YML074C		11.3833	10.3933	13.2315	10.5746	10.9963	11.3709	9.55305	9.56925		10.5746	9.87748		11.3833	10.3933		11.3709	10.5344		12.4474	12.492
YML073C		14.5466	12.7206	14.8657	14.3128	12.0497	14.6654	10.2479	10.9509		14.3128	12.7973		14.5466	12.7206		14.6654	11.6766		14.1267	14.1728
YML072C		10.1371	9.83992	10.0955	10.398	8.70473	10.9686	10.9482	10.5157		10.398	10.8004		10.1371	9.83992		10.9686	10.097		10.5992	10.3351
YML071C		6.81745	6.74104	9.35172	7.89335	8.80276	7.74877	7.23559	8.33991		7.89335	7.88941		6.81745	6.74104		7.74877	7.45967		9.12379	9.1409
YML070W		10.6809	11.5354	9.74019	10.3984	10.5099	10.2813	11.9043	12.0069		10.3984	13.1175		10.6809	11.5354		10.2813	12.1279		10.5742	10.5295
YML069W		9.94243	9.49352	10.737	9.43752	10.1882	10.1118	8.13391	8.68243		9.43752	9.66409		9.94243	9.49352		10.1118	10.9081		10.6149	10.6469
YML068W		7.65156	8.0346	8.37044	8.44903	8.23819	8.28898	8.23803	9.25895		8.44903	8.46312		7.65156	8.0346		8.28898	9.04724		8.06912	7.93351
YML067C		10.6235	10.5455	9.9428	10.4373	9.6968	10.8377	9.50198	9.94366		10.4373	10.1765		10.6235	10.5455		10.8377	10.8061		10.0742	10.2003
YML066C		7.30071	7.37412	3.30312	10.1016	8.66938	7.89062	8.48883	8.65811		10.1016	10.0366		7.30071	7.37412		7.89062	7.62461		6.86633	6.54167
YML065W		8.05852	7.63342	9.05601	7.85442	7.96318	8.53969	8.1911	9.25181		7.85442	7.09453		8.05852	7.63342		8.53969	7.25575		8.81343	8.97316
YML064C		9.00571	8.48696	9.73123	8.6413	9.38968	8.87886	7.8061	8.66489		8.6413	8.96354		9.00571	8.48696		8.87886	8.30085		9.29889	9.0189
YML063W		15.0241	12.9743	16.2233	14.8441	13.7447	15.9611	10.0477	10.6842		14.8441	12.9299		15.0241	12.9743		15.9611	13.1412		15.557	15.5935
YML062C		7.4723	6.55778	10.0264	8.10924	9.4231	8.07798	6.82113	7.70861		8.10924	8.02879		7.4723	6.55778		8.07798	8.41948		9.18143	9.20842
YML061C		7.60102	7.42124	8.94366	7.78784	7.82232	8.52893	7.02089	7.48394		7.78784	7.53072		7.60102	7.42124		8.52893	7.89872		8.61035	8.61262
YML060W		7.4083	6.91296	9.22827	8.03558	7.69815	8.31715	6.3277	6.6078		8.03558	5.69021		7.4083	6.91296		8.31715	5.84489		8.50767	8.66049
YML059C		8.82786	8.16218	7.9865	7.83336	7.43156	9.14298	8.93369	7.91885		7.83336	8.98904		8.82786	8.16218		9.14298	8.49699		8.47044	8.48018
YML058W-A		8.09017	9.6174	8.46294	7.73969	13.9375	9.85996	12.8573	12.8217		7.73969	8.1661		8.09017	9.6174		9.85996	9.92902		8.06679	8.36414
YML058W		14.647	14.1228	14.3403	13.8434	12.2166	14.658	14.2171	13.7538		13.8434	13.1284		14.647	14.1228		14.658	13.6796		13.088	12.8445
YML057W		10.0876	10.1477	9.62038	10.0813	9.09913	9.30874	10.5868	10.0862		10.0813	11.0025		10.0876	10.1477		9.30874	10.4017		9.49931	9.42233
YML057C-A		9.62887	9.66959	5.47309	9.28528	8.71987	8.45786	10.0564	9.60222		9.28528	10.3183		9.62887	9.66959		8.45786	9.68323		8.42597	8.16852
YML056C		13.396	9.3734	12.6347	13.1762	10.2686	13.2768	8.83579	7.95323		13.1762	10.3844		13.396	9.3734		13.2768	9.54664		12.1684	12.0707
YML055W		10.0558	10.1178	10.5848	10.5153	10.1998	10.2815	7.47537	8.23973		10.5153	10.244		10.0558	10.1178		10.2815	9.75019		10.241	10.3878
YML054C		7.44838	11.8874	5.45494	7.92486	7.2512	7.71845	11.2756	10.1208		7.92486	11.9647		7.44838	11.8874		7.71845	8.23657		7.12237	7.00945
YML054C-A		8.11717	8.78728	5.53057	8.26274	7.74871	7.5798	6.35085	6.08075		8.26274	8.43051		8.11717	8.78728		7.5798	7.67751		7.4474	5.79055
YML053C		8.3421	9.30704	9.39075	8.44898	9.44414	8.67804	8.0445	8.98085		8.44898	9.61927		8.3421	9.30704		8.67804	8.1213		9.78638	9.78938
YML052W		12.6784	11.7043	11.8737	11.3386	10.9918	12.1098	10.5905	10.4633		11.3386	11.3762		12.6784	11.7043		12.1098	11.2627		10.9784	10.9878
YML051W		10.9118	9.95355	9.66246	10.2511	9.38224	10.6247	10.0715	10.3073		10.2511	10.4039		10.9118	9.95355		10.6247	10.8125		9.64872	9.61756
YML050W		6.99222	7.77231	7.8476	7.76267	7.79195	7.35775	8.19191	8.32201		7.76267	8.01264		6.99222	7.77231		7.35775	8.23481		7.71434	7.59062
YML049C		8.10819	7.8099	8.24928	8.49546	7.60084	8.61916	9.40381	8.69636		8.49546	8.71842		8.10819	7.8099		8.61916	8.45111		8.3883	8.37842
YML048W		12.8908	12.4214	11.4993	12.5893	10.4426	12.2206	12.0807	11.1277		12.5893	12.6813		12.8908	12.4214		12.2206	12.3708		10.9037	10.925
YML047W-A		6.67164	5.3123	4.40376	4.51149	5.73187	3.68077	2.6886	3.87793		4.51149	5.19949		6.67164	5.3123		3.68077	3.19243		6.36006	6.90966
YML041C		7.28408	7.91228	8.78726	8.5462	9.15935	8.1068	8.34909	8.92217		8.5462	9.09882		7.28408	7.91228		8.1068	9.08347		8.27611	8.4715
YML038C		10.3916	10.0205	9.90331	10.3362	10.1483	10.414	9.06419	8.63221		10.3362	9.81139		10.3916	10.0205		10.414	10.7364		9.72103	9.60382
YML037C		5.78507	5.23309	7.62556	6.68966	7.52951	6.77267	6.0386	5.09548		6.68966	6.71185		5.78507	5.23309		6.77267	6.09293		6.42466	7.08212
YML036W		9.22138	9.01411	9.99173	9.73048	8.45789	9.53587	7.29851	7.29283		9.73048	9.46727		9.22138	9.01411		9.53587	9.07839		9.2103	9.19764
YML035C		9.71166	9.53566	9.56229	8.79101	8.56163	9.75757	10.9455	10.7742		8.79101	9.14022		9.71166	9.53566		9.75757	9.32547		9.37595	9.34476
YML034W		8.16367	8.3869	9.34161	8.78109	7.86206	8.47068	9.35564	9.99994		8.78109	8.97276		8.16367	8.3869		8.47068	8.15093		8.93546	8.74485
YML034C-A		7.29713	7.34872	5.27921	8.06501	7.26843	7.40131	9.17138	9.69198		8.06501	8.32687		7.29713	7.34872		7.40131	7.17062		8.51235	7.8555
YML032C		9.24435	8.73826	9.87948	9.25516	9.17943	8.91444	9.22453	8.13548		9.25516	9.46523		9.24435	8.73826		8.91444	9.36039		9.42539	9.37729
YML031W		10.3744	9.30999	9.79069	9.94793	9.05044	10.4913	9.459	9.02476		9.94793	10.0427		10.3744	9.30999		10.4913	9.72443		9.84014	9.74023
YML031C-A		9.72756	8.66676	5.02714	8.7392	8.20633	9.43056	8.63216	8.19771		8.7392	8.72241		9.72756	8.66676		9.43056	8.73093		8.30656	8.29607
YML030W		9.20194	9.8272	10.9732	9.86714	10.0981	9.29885	10.3445	11.3186		9.86714	10.1397		9.20194	9.8272		9.29885	9.37953		10.0166	10.0669
YML029W		8.57038	9.16518	8.32593	8.88856	7.90558	8.91906	9.25995	9.0318		8.88856	9.50293		8.57038	9.16518		8.91906	9.90571		8.41699	8.34122
YML028W		15.3754	15.4114	14.9058	15.2314	14.4147	15.9678	15.1213	14.3318		15.2314	15.1147		15.3754	15.4114		15.9678	17.7409		15.3745	15.2858
YML027W		9.30839	10.5694	9.48224	7.7805	9.93789	9.24717	7.95761	7.71871		7.7805	8.32739		9.30839	10.5694		9.24717	7.74811		9.47768	9.38953
YML026C		14.7706	12.3295	15.9602	14.2348	12.9989	14.9832	9.61074	10.2734		14.2348	12.5014		14.7706	12.3295		14.9832	11.6896		14.0496	14.1
YML025C		9.22898	9.56429	10.0569	9.03677	9.75827	8.9879	10.3796	10.4669		9.03677	9.36693		9.22898	9.56429		8.9879	9.54018		9.68628	9.81492
YML024W		14.7902	12.5907	15.4358	14.1634	12.8354	14.9401	9.68385	10.4072		14.1634	12.6866		14.7902	12.5907		14.9401	12.3775		14.2513	14.3924
YML023C		9.26065	9.25079	8.92848	10.0527	8.45852	9.60609	8.06766	7.99699		10.0527	9.64875		9.26065	9.25079		9.60609	9		8.88668	8.86861
YML022W		13.7501	12.4564	13.5583	13.0661	10.665	13.972	9.80958	9.18087		13.0661	11.0624		13.7501	12.4564		13.972	11.6859		11.8891	11.9224
YML021C		8.95357	7.58207	9.35517	8.59998	8.81736	8.90006	8.38487	8.57105		8.59998	8.46727		8.95357	7.58207		8.90006	8.68662		9.13193	9.15073
YML020W		7.551	7.71112	8.06566	7.6753	8.23209	7.39836	8.03329	8.58965		7.6753	8.2159		7.551	7.71112		7.39836	7.15361		8.17315	8.21807
YML019W		10.8367	10.3229	9.99769	10.383	9.27277	10.9095	8.31677	8.59252		10.383	10.154		10.8367	10.3229		10.9095	9.90363		9.7694	9.78294
YML018C		11.6826	9.64863	10.8932	11.1148	11.3322	11.601	9.3147	9.66909		11.1148	9.55717		11.6826	9.64863		11.601	7.8419		10.1181	9.8851
YML017W		8.3769	7.67412	8.93104	7.25572	7.89527	8.60646	9.57388	10.5978		7.25572	7.94131		8.3769	7.67412		8.60646	8.40721		8.47992	8.44673
YML016C		9.89384	9.73527	9.31419	10.2225	8.96975	9.82237	9.30157	9.52677		10.2225	10.2584		9.89384	9.73527		9.82237	10.3631		9.02092	9.15322
YML015C		8.61013	8.35589	9.70932	8.04345	9.23339	8.89739	7.16923	7.5531		8.04345	7.66751		8.61013	8.35589		8.89739	8.68793		9.09408	9.17771
YML014W		9.18599	8.7859	10.3778	8.87671	9.30844	9.55125	7.34803	7.71647		8.87671	7.83517		9.18599	8.7859		9.55125	8.06947		9.4945	9.41155
YML013W		9.40766	9.97935	8.87776	9.15982	9.20443	9.34477	10.7829	10.6285		9.15982	9.69669		9.40766	9.97935		9.34477	10.253		9.11231	9.09104
YML012C-A		9.83318	10.4747	4.35722	9.74664	9.54697	9.92829	11.189	10.9963		9.74664	10.3123		9.83318	10.4747		9.92829	10.7232		9.51997	9.4837
YML012W		12.9917	13.1205	13.3375	12.538	12.1858	13.1761	11.8303	12.0552		12.538	12.385		12.9917	13.1205		13.1761	13.0119		12.5027	12.6211
YML011C		9.53618	9.02647	9.09573	9.27756	9.48143	9.12795	8.12088	8.67871		9.27756	9.70921		9.53618	9.02647		9.12795	9.25963		9.06882	8.9616
YML010W		10.3941	9.10709	10.6446	8.89909	8.92493	10.3916	8.99764	9.25588		8.89909	8.81642		10.3941	9.10709		10.3916	9.76511		10.3845	10.2494
YML009W-B		11.6304	10.1177	11.206	9.7143	9.32109	10.855	9.31768	9.99563		9.7143	9.55953		11.6304	10.1177		10.855	10.2653		10.8166	10.6894
YML009C-A		11.6946	10.1245	6.65128	9.70305	9.30768	10.6622	9.14577	9.64534		9.70305	9.50429		11.6946	10.1245		10.6622	10.0654		10.9921	10.8483
YML009C		10.2766	10.501	11.7719	10.0607	10.7124	10.6258	10.5937	11.31		10.0607	10.389		10.2766	10.501		10.6258	10.5889		10.6205	10.9386
YML008C		12.3155	12.1146	13.0633	12.6808	11.1179	11.9672	12.5372	11.7414		12.6808	12.3945		12.3155	12.1146		11.9672	10.8834		12.3815	12.314
YML007C-A		6.62076	7.53358	7.20104	6.91084	7.82097	6.35287	9.05374	9.2237		6.91084	6.19641		6.62076	7.53358		6.35287	8.98494		5.3809	4.15701
YML007W		9.54566	9.97134	10.0839	10.3583	9.897	10.0942	10.4471	10.2154		10.3583	10.5602		9.54566	9.97134		10.0942	12.2232		10.1672	10.1027
YML006C		7.78413	7.32321	8.43759	7.81686	7.66763	8.0075	8.60436	8.29808		7.81686	7.52385		7.78413	7.32321		8.0075	7.05994		8.43939	8.39615
YML005W		8.15851	8.31625	8.92594	8.68117	8.08066	8.38233	8.70405	8.80763		8.68117	8.77563		8.15851	8.31625		8.38233	7.93487		8.5299	8.61779
YML004C		10.6388	12.6397	11.1993	11.4558	10.8465	11.0882	13.6151	13.5809		11.4558	12.7846		10.6388	12.6397		11.0882	12.9243		11.059	11.121
YML003W		6.59879	7.25432	6.71426	7.47458	7.84272	7.09897	9.48431	9.26524		7.47458	7.77958		6.59879	7.25432		7.09897	7.94425		6.99044	6.61899
YML002W		7.44544	8.29822	6.68853	8.98352	8.83899	8.5095	9.80266	9.63581		8.98352	9.52694		7.44544	8.29822		8.5095	8.79975		7.80435	7.89788
YML001W		11.4765	10.9325	11.7836	11.0364	11.2771	11.6677	9.9176	10.4157		11.0364	11.291		11.4765	10.9325		11.6677	12.1406		11.6545	11.6472
YMR001C		9.13956	8.08893	9.7395	8.34939	8.78498	9.2896	7.00756	7.81003		8.34939	7.89147		9.13956	8.08893		9.2896	6.79807		9.42833	9.30524
YMR001C-A		7.46711	5.84473	8.52116	6.17544	7.39737	6.51749	4.35255	6.34924		6.17544	5.25938		7.46711	5.84473		6.51749	2.47238		5.32357	6.57361
YMR002W		12.3918	12.6389	13.2177	12.1493	10.7435	12.1855	12.1077	11.3543		12.1493	13.0966		12.3918	12.6389		12.1855	12.3619		12.3792	12.2926
YMR003W		8.808	8.73393	8.66619	8.41441	8.43247	8.05002	7.34026	6.87248		8.41441	8.40303		8.808	8.73393		8.05002	6.31777		8.66798	8.77666
YMR004W		8.40994	8.32465	9.25882	9.41606	9.08955	8.59606	8.59947	8.67285		9.41606	9.46774		8.40994	8.32465		8.59606	9.44766		9.27335	9.1838
YMR005W		9.41992	8.78327	10.9527	9.49752	9.67038	9.65418	8.58176	8.94875		9.49752	9.20794		9.41992	8.78327		9.65418	9.34586		10.0689	10.1292
YMR006C		11.6338	10.8843	10.0229	9.90443	10.3246	11.4191	12.2397	11.9354		9.90443	7.52265		11.6338	10.8843		11.4191	8.27486		9.94177	9.66023
YMR007W		7.75798	7.65803	4.26981	9.93896	6.94428	7.19723	10.0611	8.42484		9.93896	8.91043		7.75798	7.65803		7.19723	7.59705		7.0611	7.38776
YMR008C		10.2376	11.537	9.88221	12.8007	10.093	9.78056	13.6129	12.6822		12.8007	10.9211		10.2376	11.537		9.78056	11.1144		10.5441	10.3199
YMR009W		8.80077	9.53453	10.9637	12.8789	9.03484	9.38665	10.5869	9.40428		12.8789	10.9517		8.80077	9.53453		9.38665	9.19182		9.68346	9.80797
YMR010W		10.9699	10.1643	9.64044	10.2506	9.14804	10.4151	8.93414	7.95497		10.2506	10.1		10.9699	10.1643		10.4151	9.78984		9.9938	9.93528
YMR011W		13.1859	11.9562	10.5803	13.1331	9.04655	13.6332	12.5777	9.36917		13.1331	13.9021		13.1859	11.9562		13.6332	10.426		8.78898	8.08737
YMR012W		10.5063	9.12273	10.7057	10.2887	8.47975	10.9669	9.57695	8.78208		10.2887	9.68772		10.5063	9.12273		10.9669	9.82112		10.9862	10.9348
YMR013C-A		9.68636	9.0114	10.2141	10.1275	8.77627	9.60676	8.85812	9.20921		10.1275	9.96296		9.68636	9.0114		9.60676	9.12068		8.19443	8.91901
YMR013C		9.24226	8.47043	8.6987	9.82457	8.33891	9.17052	8.35185	8.8983		9.82457	9.75058		9.24226	8.47043		9.17052	8.66479		8.03559	8.37874
YMR013W-A		7.28285	7.69567	6.57961	6.75772	6.14274	6.01459	3.71244	5.79075		6.75772	5.29734		7.28285	7.69567		6.01459	6.21639		6.42043	5.76358
YMR014W		9.05311	7.46726	11.1108	8.34467	9.02227	9.36854	7.25518	6.09615		8.34467	5.88784		9.05311	7.46726		9.36854	5.46041		10.0738	9.87764
YMR015C		11.8448	11.8553	11.475	12.7751	9.50311	11.3971	13.8557	13.0885		12.7751	13.0124		11.8448	11.8553		11.3971	9.50727		10.5944	10.5581
YMR016C		8.46688	8.22694	9.39756	8.77629	7.54083	9.16883	9.72205	8.52865		8.77629	8.47642		8.46688	8.22694		9.16883	9.6355		9.21276	8.86875
YMR017W		4.69359	6.46354	3.56636	5.5817	7.12398	4.01568	6.37503	5.7769		5.5817	6.17049		4.69359	6.46354		4.01568	5.284		4.27566	4.78873
YMR018W		4.98275	6.85699	4.69455	5.7192	7.13617	5.15793	4.00322	5.07326		5.7192	6.21817		4.98275	6.85699		5.15793	4.15783		5.53612	4.96947
YMR019W		7.58889	7.87254	8.08657	8.09656	8.67528	8.36125	8.12201	8.11982		8.09656	7.99334		7.58889	7.87254		8.36125	8.30705		8.10796	8.019
YMR020W		8.39404	8.93468	8.25342	9.1351	10.1485	8.61794	11.026	12.0041		9.1351	8.88937		8.39404	8.93468		8.61794	10.4792		8.19875	8.40959
YMR021C		8.34156	8.37012	8.69106	8.71672	9.30954	8.34787	9.64668	10.1153		8.71672	8.97099		8.34156	8.37012		8.34787	8.36302		8.13092	7.89857
YMR022W		11.1839	10.8113	10.7116	10.861	11.2118	10.8834	11.413	11.7051		10.861	11.0795		11.1839	10.8113		10.8834	11.9332		10.3343	10.5528
YMR023C		6.94952	7.6215	7.30016	8.06448	7.64705	7.16285	8.55495	8.58506		8.06448	8.26586		6.94952	7.6215		7.16285	8.05277		7.35605	7.53209
YMR024W		9.72977	9.19127	10.3397	9.54063	8.98207	9.42874	9.71912	9.59994		9.54063	9.96825		9.72977	9.19127		9.42874	10.0334		9.6763	9.65564
YMR025W		5.52444	7.94207	6.68968	6.56189	7.38523	6.39933	6.38716	6.94499		6.56189	7.10748		5.52444	7.94207		6.39933	7.51398		7.23888	7.26321
YMR026C		8.7758	9.30104	9.04202	8.16818	9.3221	9.03537	8.82723	9.32132		8.16818	8.70707		8.7758	9.30104		9.03537	8.81756		8.83524	8.8576
YMR027W		10.1623	11.0745	10.1985	10.0031	10.2817	10.3894	11.7776	12.5378		10.0031	10.6632		10.1623	11.0745		10.3894	11.743		10.7969	10.8435
YMR028W		8.10181	7.81086	8.92458	8.55485	8.84834	8.13829	7.9006	8.59281		8.55485	8.84346		8.10181	7.81086		8.13829	9.12068		8.78497	8.69232
YMR029C		8.24205	8.81677	9.086	8.65673	8.75367	8.75375	8.87593	9.61235		8.65673	8.87194		8.24205	8.81677		8.75375	10.0699		9.18264	9.2664
YMR030W		6.53358	7.72169	7.01078	6.64402	7.81461	5.71846	9.08882	9.66388		6.64402	7.91072		6.53358	7.72169		5.71846	7.24313		7.29872	7.68797
YMR031W-A		7.33419	7.86553	4.49031	5.81154	7.43247	6.17665	8.43611	8.53234		5.81154	7.87567		7.33419	7.86553		6.17665	7.16421		4.40713	3.75028
YMR031C		9.70629	10.2177	9.52524	8.35702	9.55601	9.12033	10.6722	10.7452		8.35702	10.5369		9.70629	10.2177		9.12033	10.1977		9.561	9.65845
YMR032W		8.37119	7.04543	9.0826	6.66005	8.12842	8.24418	5.77048	6.7305		6.66005	7.31447		8.37119	7.04543		8.24418	5.32136		8.70219	8.40191
YMR030W-A		6.02278	6.14312	6.02707	4.76831	5.88267	5.79939	4.01942	2.62379		4.76831	5.60432		6.02278	6.14312		5.79939	2.99493		6.69088	6.72591
YMR033W		9.89552	8.33328	10.341	9.62819	9.34519	9.82535	8.00305	7.56678		9.62819	9.57902		9.89552	8.33328		9.82535	9.64253		9.73751	9.70954
YMR034C		7.67734	10.2964	5.43811	5.97747	7.46874	7.36769	9.15824	8.69005		5.97747	8.08466		7.67734	10.2964		7.36769	7.71927		6.75622	6.58648
YMR035W		8.82378	10.7744	9.23843	8.22952	9.57358	9.59614	10.2204	10.7051		8.22952	9.24735		8.82378	10.7744		9.59614	9.91139		9.0919	9.31886
YMR036C		7.91271	8.26009	7.82247	7.20607	7.85511	7.71082	8.83167	8.77802		7.20607	7.96563		7.91271	8.26009		7.71082	7.21768		8.03626	7.67825
YMR037C		9.0395	9.25024	8.8537	9.16264	8.96836	8.8559	9.32276	7.76222		9.16264	11.2064		9.0395	9.25024		8.8559	9.44029		9.25558	9.21938
YMR038C		11.1824	10.2794	12.2871	10.7315	11.287	11.59	10.6222	10.6044		10.7315	11.4001		11.1824	10.2794		11.59	12.9814		11.7654	11.7437
YMR039C		9.38721	8.4406	11.2259	9.58017	10.1788	9.58882	9.24795	10.433		9.58017	10.7199		9.38721	8.4406		9.58882	9.87073		10.4804	10.6411
YMR040W		6.4993	8.58796	6.57958	9.13811	8.46109	5.56922	8.76415	9.67415		9.13811	9.64942		6.4993	8.58796		5.56922	7.59028		7.30383	7.35747
YMR041C		8.4965	9.7928	8.33286	8.43015	9.02011	8.29088	9.21286	8.82007		8.43015	9.00766		8.4965	9.7928		8.29088	10.4261		7.87047	8.20297
YMR042W		10.324	10.0045	9.95679	10.0687	11.0642	9.8685	9.90183	8.81943		10.0687	9.35348		10.324	10.0045		9.8685	7.7862		8.47218	8.5663
YMR043W		10.203	9.8535	10.9479	10.0141	10.2341	10.0724	10.8153	11.1262		10.0141	9.85247		10.203	9.8535		10.0724	9.12767		10.2264	10.2694
YMR044W		8.12797	7.9135	10.0147	8.20276	9.17386	8.81779	8.13391	8.86805		8.20276	8.44794		8.12797	7.9135		8.81779	8.82301		9.32489	9.51543
YMR046W-A		11.7542	10.9822	5.90823	11.0001	11.946	12.1627	11.4969	12.425		11.0001	10.7735		11.7542	10.9822		12.1627	11.637		5.16409	5.0922
YMR047C		9.48032	8.68211	9.87882	9.26496	9.24126	9.51626	9.06955	8.78867		9.26496	9.52087		9.48032	8.68211		9.51626	9.71687		9.69041	9.56058
YMR048W		7.85236	8.17608	8.95987	7.59205	8.85117	8.15091	7.11381	7.56187		7.59205	8.18597		7.85236	8.17608		8.15091	8.2284		8.5254	8.70543
YMR049C		10.5323	8.46726	11.3599	10.0186	8.30788	10.6664	8.11087	5.84162		10.0186	6.48854		10.5323	8.46726		10.6664	6.20733		10.2529	10.1503
YMR052W		6.94322	8.05029	7.31598	7.31118	8.49391	7.35865	6.79784	7.40221		7.31118	7.82121		6.94322	8.05029		7.35865	7.90412		7.76886	7.69697
YMR052C-A		7.12919	8.3123	4.40376	7.34943	8.20253	7.27673	7.61934	8.24716		7.34943	8.25078		7.12919	8.3123		7.27673	8.20204		7.61381	8.54193
YMR053C		5.75816	7.73957	4.49941	6.19141	6.97819	6.11925	8.3334	8.83276		6.19141	7.51123		5.75816	7.73957		6.11925	8.04013		6.47205	6.56681
YMR054W		9.9696	9.43414	9.40866	9.80634	9.09336	9.98741	10.5135	10.4878		9.80634	10.5784		9.9696	9.43414		9.98741	10.3398		9.47582	9.31164
YMR055C		9.14995	9.6316	7.8161	8.41853	8.24891	8.57095	8.02258	7.74297		8.41853	8.97446		9.14995	9.6316		8.57095	8.78943		7.47801	7.46582
YMR056C		8.6867	12.4878	7.50679	8.53591	10.0914	7.68126	8.96526	8.73548		8.53591	9.10702		8.6867	12.4878		7.68126	8.89091		6.77366	6.66861
YMR057C		4.87602	5.49636	4.3043	5.48803	6.78134	5.52997	8.47249	8.42938		5.48803	6.01557		4.87602	5.49636		5.52997	6.3663		3.63616	4.56427
YMR058W		11.5058	12.5622	11.7045	11.054	11.966	12.7675	9.4296	9.40641		11.054	11.3134		11.5058	12.5622		12.7675	13.271		12.0242	12.1655
YMR059W		8.45238	9.10702	9.13001	9.10907	8.94319	8.4418	8.80778	9.74386		9.10907	8.9045		8.45238	9.10702		8.4418	7.69586		8.27957	8.38988
YMR060C		8.0003	8.2778	9.12464	8.59563	8.8195	8.29897	8.34393	8.94297		8.59563	9.16681		8.0003	8.2778		8.29897	8.97383		9.35175	9.38973
YMR061W		8.85852	8.25263	9.66191	9.39067	9.35553	9.32185	8.57394	9.18707		9.39067	9.08819		8.85852	8.25263		9.32185	9.04124		9.36263	9.4554
YMR062C		10.6582	10.1625	10.012	10.0267	12.4667	10.0694	9.07461	9.04313		10.0267	9.30629		10.6582	10.1625		10.0694	11.4616		9.75374	9.83647
YMR063W		7.88474	8.46484	8.01479	7.44702	8.36855	8.21001	8.45391	8.1623		7.44702	7.66191		7.88474	8.46484		8.21001	8.11297		7.87329	7.63394
YMR064W		9.06798	9.00877	8.74803	8.49302	8.77722	8.92747	8.70827	8.89934		8.49302	8.75146		9.06798	9.00877		8.92747	8.82311		9.10604	9.14633
YMR065W		6.93001	6.55035	7.53264	7.31757	8.20667	7.25601	5.88712	5.95781		7.31757	7.36569		6.93001	6.55035		7.25601	7.88233		7.5989	7.95618
YMR066W		6.2012	6.20302	7.44376	6.74691	7.75552	6.67186	6.70198	6.94291		6.74691	6.93741		6.2012	6.20302		6.67186	7.56778		7.52637	7.6311
YMR067C		8.76	8.86391	9.3539	10.0361	8.79485	9.03462	8.99758	8.41462		10.0361	10.1384		8.76	8.86391		9.03462	9.78075		9.3863	9.22819
YMR068W		7.06142	8.10642	7.47607	8.08437	7.61599	7.10898	8.56424	8.65554		8.08437	9.0779		7.06142	8.10642		7.10898	8.22386		7.37583	7.31953
YMR069W		5.28154	6.09804	7.08684	5.66086	6.33137	5.77441	6.99862	6.57163		5.66086	5.38065		5.28154	6.09804		5.77441	4.0041		6.43049	6.21658
YMR070W		8.20531	8.26833	9.57732	8.01044	7.47935	8.11855	9.62958	7.469		8.01044	10.1847		8.20531	8.26833		8.11855	6.77083		9.39224	9.24422
YMR071C		11.5394	11.4539	10.8753	11.0701	11.4585	11.0961	10.5824	11.0224		11.0701	10.8758		11.5394	11.4539		11.0961	12.2418		11.1228	11.1814
YMR072W		12.1861	12.3578	12.3422	11.858	11.4422	12.1263	10.5009	10.841		11.858	12.0472		12.1861	12.3578		12.1263	12.2768		12.2025	12.2285
YMR073C		9.45121	9.74297	8.67738	9.32162	9.55481	9.69756	9.38739	9.47838		9.32162	9.96977		9.45121	9.74297		9.69756	9.29476		9.15131	9.31147
YMR074C		11.2216	11.2607	11.911	11.0475	11.2427	11.6926	10.6607	11.2699		11.0475	10.8574		11.2216	11.2607		11.6926	11.5034		11.4395	11.4961
YMR075W		7.28909	7.1672	8.42937	7.85768	8.38322	7.61462	8.09116	8.49897		7.85768	7.90425		7.28909	7.1672		7.61462	6.99013		8.59246	8.52896
YMR075C-A		7.92167	7.47925	7.22569	8.43273	8.55197	8.10969	8.13154	8.68528		8.43273	8.54776		7.92167	7.47925		8.10969	7.182		9.27433	9.17269
YMR076C		7.58505	7.51306	8.30905	6.96049	7.07836	8.07678	6.02758	5.8049		6.96049	6.56826		7.58505	7.51306		8.07678	7.32416		8.5813	8.71843
YMR077C		6.36728	7.73607	9.47321	8.57143	9.46001	7.78759	7.73181	8.63874		8.57143	8.66909		6.36728	7.73607		7.78759	8.16162		8.77322	8.68984
YMR078C		7.70116	7.89192	8.95983	7.68699	8.14679	8.5521	7.24393	6.18028		7.68699	7.79515		7.70116	7.89192		8.5521	8.15826		8.88797	8.89907
YMR079W		12.1222	11.2982	12.0454	11.5978	9.86344	11.7434	9.2533	9.44089		11.5978	10.8666		12.1222	11.2982		11.7434	10.8061		10.5597	10.6123
YMR080C		9.83506	8.82244	10.1424	10.113	8.54859	10.3755	10.1087	9.54028		10.113	9.47393		9.83506	8.82244		10.3755	9.10394		9.6599	9.58942
YMR083W		13.5774	13.1283	12.2451	12.8158	11.927	13.0732	12.4965	12.5504		12.8158	11.8469		13.5774	13.1283		13.0732	13.2243		12.4313	12.4786
YMR084W		5.37626	6.54033	4.37158	9.09679	6.58544	5.50391	8.74532	8.96942		9.09679	7.47274		5.37626	6.54033		5.50391	8.79001		5.1364	5.87186
YMR085W		5.86447	8.27636	5.84843	9.61946	7.29697	5.91875	9.16261	9.31567		9.61946	8.3015		5.86447	8.27636		5.91875	9.5522		5.63949	6.08217
YMR086W		8.56616	8.96991	8.89022	8.777	8.51832	9.15001	9.62008	8.45742		8.777	9.17236		8.56616	8.96991		9.15001	10.1056		9.20944	9.09187
YMR086C-A		8.40072	8.55312	5.3068	8.86617	7.67207	8.5109	8.87597	7.68893		8.86617	9.36591		8.40072	8.55312		8.5109	9.05153		9.03696	8.98369
YMR087W		8.96474	8.9367	7.84064	8.21814	8.68022	8.19588	9.95436	9.65947		8.21814	9.52109		8.96474	8.9367		8.19588	9.31706		8.47993	8.31785
YMR088C		10.571	10.4185	9.14414	9.9375	9.02592	10.726	9.58038	8.9447		9.9375	10.1029		10.571	10.4185		10.726	10.0975		9.33601	9.40662
YMR089C		9.08343	9.18965	9.8923	9.07595	8.32565	9.45652	10.2008	10.2315		9.07595	9.44704		9.08343	9.18965		9.45652	9.83426		9.90317	9.94091
YMR090W		8.72533	12.3294	8.85298	9.03224	11.3406	8.36078	14.1263	15.0573		9.03224	10.9604		8.72533	12.3294		8.36078	14.1856		9.3349	9.60444
YMR091C		9.64741	8.02781	10.4785	8.91531	9.30546	9.47368	8.60269	8.96133		8.91531	8.9868		9.64741	8.02781		9.47368	9.18214		10.1259	10.0563
YMR092C		10.3159	10.2784	10.2983	9.90472	10.1437	10.4537	10.4747	10.1162		9.90472	10.3214		10.3159	10.2784		10.4537	11.4904		10.5892	10.6674
YMR093W		10.4979	8.59454	10.8252	9.73672	9.06758	10.5891	8.46233	6.70993		9.73672	7.72687		10.4979	8.59454		10.5891	7.1308		10.011	9.81434
YMR094W		7.15468	7.2619	7.10645	6.87462	8.24149	7.51614	7.25461	6.94918		6.87462	6.72662		7.15468	7.2619		7.51614	6.25633		7.55684	7.18444
YMR095C		7.74751	9.32646	3.52072	7.62392	10.3603	8.22191	8.38298	8.29867		7.62392	8.16656		7.74751	9.32646		8.22191	7.54063		7.65922	7.45957
YMR096W		9.25298	11.1853	8.43223	8.98328	13.7012	8.79341	9.45002	9.5495		8.98328	10.4239		9.25298	11.1853		8.79341	8.52824		7.89475	7.70869
YMR097C		7.88827	8.32054	8.97751	8.48395	9.31413	8.07927	7.94752	9.28322		8.48395	8.82533		7.88827	8.32054		8.07927	9.24165		8.906	8.76969
YMR098C		7.42415	8.03	8.7154	8.14942	7.7225	8.11917	8.46025	8.76971		8.14942	8.34195		7.42415	8.03		8.11917	8.44176		8.42864	8.5019
YMR099C		11.1641	11.4151	11.2802	10.9273	10.7079	11.3469	10.7445	11.1993		10.9273	10.6436		11.1641	11.4151		11.3469	11.8991		11.5133	11.5305
YMR100W		8.12111	7.97762	8.99734	8.47211	8.06991	8.70923	8.90313	9.33865		8.47211	8.22865		8.12111	7.97762		8.70923	8.47168		8.52623	8.42984
YMR102C		8.17535	7.60942	9.06386	9.77852	8.21689	8.41685	8.82209	8.8942		9.77852	8.39221		8.17535	7.60942		8.41685	8.51116		9.17244	9.13251
YMR103C		9.19247	11.3694	8.65709	9.76939	9.12956	8.43891	12.6393	12.8131		9.76939	10.25		9.19247	11.3694		8.43891	10.4285		8.34392	8.40696
YMR104C		8.04983	10.1303	7.52755	9.11122	8.64563	7.71364	11.5971	11.9343		9.11122	9.23289		8.04983	10.1303		7.71364	9.81761		7.452	7.47088
YMR105C		7.93587	11.983	7.66177	7.957	10.2851	7.71826	15.1469	15.1672		7.957	13.0487		7.93587	11.983		7.71826	11.8983		9.88881	10.5172
YMR105W-A		6.96881	8.12435	5.23613	6.52419	7.75069	7.37928	6.98928	7.59365		6.52419	7.02986		6.96881	8.12435		7.37928	6.80596		7.37534	7.30345
YMR106C		6.53755	7.52039	7.50483	6.76945	7.62307	7.14548	6.06159	6.94686		6.76945	7.11253		6.53755	7.52039		7.14548	6.69536		7.63988	7.49538
YMR107W		5.67975	14.3538	5.345	3.26231	10.148	4.25436	7.25321	5.53565		3.26231	4.8823		5.67975	14.3538		4.25436	5.2525		2.58037	2.66049
YMR108W		11.7906	10.7272	12.5277	11.7812	11.9333	12.368	12.3086	11.8981		11.7812	9.96779		11.7906	10.7272		12.368	11.1804		11.4085	11.2317
YMR109W		8.68573	8.49808	9.40957	8.96434	8.5795	9.11224	8.59909	8.32749		8.96434	9.41264		8.68573	8.49808		9.11224	9.55853		9.64489	9.49702
YMR110C		9.47079	12.1174	9.12342	10.0791	8.48659	9.09956	11.1078	11.0411		10.0791	11.1992		9.47079	12.1174		9.09956	11.1682		9.2772	9.54794
YMR111C		6.76783	7.11583	8.14059	6.9831	8.20788	7.44359	7.33432	7.74388		6.9831	7.40248		6.76783	7.11583		7.44359	8.16827		7.82295	8.00345
YMR112C		7.88729	8.17961	10.2663	9.04744	9.06244	8.97872	7.45758	8.80136		9.04744	8.71135		7.88729	8.17961		8.97872	9.09508		8.98891	9.20199
YMR113W		8.66616	7.93675	9.1707	8.71533	8.69089	8.62908	7.71707	7.59598		8.71533	8.79547		8.66616	7.93675		8.62908	9.43293		8.69438	8.70774
YMR114C		6.70642	9.2067	8.27982	7.39048	9.05162	7.02948	8.83332	10.026		7.39048	8.40331		6.70642	9.2067		7.02948	8.79125		7.94552	7.89788
YMR115W		8.49207	8.72023	9.02564	8.59583	8.42409	8.36217	8.84746	8.78938		8.59583	8.90512		8.49207	8.72023		8.36217	9.02378		8.77363	8.89565
YMR116C		16.282	14.1006	16.1536	15.0831	12.603	16.6838	10.9271	10.94		15.0831	12.8499		16.282	14.1006		16.6838	13.915		15.1628	15.1981
YMR117C		8.33133	8.76335	8.07592	8.16346	7.99688	8.55579	5.87787	5.61152		8.16346	7.94174		8.33133	8.76335		8.55579	7.85826		8.13429	8.43521
YMR119W-A		11.1374	10.444	9.02968	10.4955	9.1395	10.1439	9.93432	10.3507		10.4955	10.6004		11.1374	10.444		10.1439	10.4513		9.84374	9.82881
YMR120C		15.0109	10.2098	7.57605	13.8321	12.372	12.6968	9.58611	8.84629		13.8321	13.4356		15.0109	10.2098		12.6968	8.56202		11.8317	11.5099
YMR121C		11.0939	10.5486	10.8309	10.1516	11.3606	12.5094	9.10978	9.85256		10.1516	10.3963		11.0939	10.5486		12.5094	11.6004		12.7789	12.8439
YMR122C		8.20534	7.61346	5.94471	8.4213	8.32894	7.78882	6.65355	4.42784		8.4213	7.63077		8.20534	7.61346		7.78882	8.29579		6.32501	5.55268
YMR122W-A		16.1912	15.9728	15.117	16.197	14.6876	15.1321	15.4779	15.1522		16.197	15.7223		16.1912	15.9728		15.1321	14.6705		14.627	14.5078
YMR123W		12.1904	10.709	11.751	11.0435	10.7804	11.746	9.52231	9.28119		11.0435	10.4799		12.1904	10.709		11.746	10.676		11.0229	10.8706
YMR124W		7.83414	8.04837	8.26089	8.28341	7.9669	8.18368	8.76736	8.53212		8.28341	8.63266		7.83414	8.04837		8.18368	8.54138		8.55946	8.35692
YMR125W		9.53681	8.47939	9.88886	9.4834	8.74827	9.93878	7.99998	8.31827		9.4834	9.03459		9.53681	8.47939		9.93878	9.10133		9.88747	9.83483
YMR126C		8.62581	8.41072	8.46262	8.39693	8.56415	8.84147	7.58097	7.89967		8.39693	8.12735		8.62581	8.41072		8.84147	8.55905		8.48118	8.29607
YMR127C		8.42648	8.34141	9.18386	8.71656	9.00625	9.00369	8.06594	8.38842		8.71656	7.88655		8.42648	8.34141		9.00369	7.62069		8.57753	8.46205
YMR128W		8.72187	6.84105	9.79478	7.92244	7.49343	9.20631	7.13436	6.26409		7.92244	4.84075		8.72187	6.84105		9.20631	5.10207		9.24636	9.13642
YMR129W		9.26503	8.29918	8.66044	9.10021	7.44891	9.8866	8.78133	8.4862		9.10021	8.82034		9.26503	8.29918		9.8866	8.35852		8.86983	8.71945
YMR130W		9.59834	8.57643	9.95344	9.6453	8.89425	9.77791	8.54107	8.49228		9.6453	9.34476		9.59834	8.57643		9.77791	9.76806		9.57118	9.68892
YMR131C		11.1707	9.3257	12.1145	10.7998	9.87297	11.9459	9.41537	8.00506		10.7998	7.10389		11.1707	9.3257		11.9459	8.5199		11.4444	11.2883
YMR132C		7.73727	7.14687	9.69784	8.82233	8.46567	8.51587	5.61242	6.42324		8.82233	8.35237		7.73727	7.14687		8.51587	7.50875		7.99152	7.96085
YMR133W		7.65989	9.51626	3.25764	7.06153	6.67829	7.18397	6.36471	5.6763		7.06153	7.80087		7.65989	9.51626		7.18397	8.63351		6.89095	6.85858
YMR134W		9.45004	9.04759	9.57206	10.4392	8.62123	9.03595	8.73014	8.80462		10.4392	10.0816		9.45004	9.04759		9.03595	8.92902		9.01747	8.98997
YMR135W-A		8.04489	9.21572	4.85876	6.83439	8.75281	6.34205	8.03842	8.3254		6.83439	7.09307		8.04489	9.21572		6.34205	7.78083		5.28455	6.43505
YMR135C		9.50503	10.6494	8.43516	9.24668	10.5921	8.48593	10.032	10.0791		9.24668	9.5297		9.50503	10.6494		8.48593	10.2032		8.69998	8.92398
YMR136W		10.0733	10.6692	7.66521	9.21304	9.06219	7.57508	10.3408	9.48845		9.21304	8.26812		10.0733	10.6692		7.57508	7.73774		8.43578	8.37529
YMR137C		5.78146	7.61123	7.03981	6.4326	7.67238	6.47664	7.42357	7.72953		6.4326	6.72351		5.78146	7.61123		6.47664	6.6605		7.41934	7.29753
YMR138W		8.03523	8.10447	9.15016	7.92765	8.00659	8.42512	6.67823	6.31117		7.92765	6.95555		8.03523	8.10447		8.42512	7.76846		8.21485	8.32582
YMR139W		9.26436	10.151	8.74511	9.48815	9.25333	8.97345	10.6886	10.5511		9.48815	10.3746		9.26436	10.151		8.97345	11.2939		9.32187	9.09693
YMR140W		8.13448	9.21329	8.22179	8.44104	8.6875	8.06321	9.98305	10.0863		8.44104	9.50409		8.13448	9.21329		8.06321	9.44384		8.60209	8.70595
YMR141C		8.55593	8.7917	5.224	8.50526	8.32265	8.1423	9.94406	10.0994		8.50526	9.92373		8.55593	8.7917		8.1423	9.21543		8.83459	8.87636
YMR141W-A		7.37356	5.14574	5.60568	6.93587	9.5896	7.55228	5.39052	4.99489		6.93587	5.29734		7.37356	5.14574		7.55228	5.30396		8.60947	9.12254
YMR142C		14.7031	12.6826	15.0393	14.4142	13.1667	14.7676	10.3044	11.0634		14.4142	12.9093		14.7031	12.6826		14.7676	12.1554		14.3909	14.3902
YMR143W		15.022	13.0463	14.9057	14.0716	12.5031	14.7238	9.24223	9.69651		14.0716	12.5574		15.022	13.0463		14.7238	12.6729		13.8163	13.8416
YMR144W		7.97365	7.44494	9.15375	7.36001	8.5017	7.70819	5.28473	6.19396		7.36001	7.76174		7.97365	7.44494		7.70819	7.77517		8.68399	8.74026
YMR145C		13.0591	13.4441	11.6886	13.7076	6.46511	11.3892	10.641	7.65409		13.7076	12.4552		13.0591	13.4441		11.3892	11.2135		10.4025	10.5172
YMR146C		12.6686	11.3158	13.3595	12.1681	11.1793	12.6227	10.4687	10.2636		12.1681	10.7814		12.6686	11.3158		12.6227	11.0969		12.53	12.4929
YMR147W		9.36844	11.0938	8.38807	8.52483	7.71966	8.50546	7.95153	8.08878		8.52483	8.98184		9.36844	11.0938		8.50546	6.94842		8.25873	8.38354
YMR148W		10.2882	11.6065	8.32002	9.60157	9.76948	9.74122	10.3101	9.9234		9.60157	10.5396		10.2882	11.6065		9.74122	10.2945		9.25383	9.72556
YMR149W		12.6065	11.415	11.6524	11.8696	10.847	12.3064	10.8478	10.8742		11.8696	11.8713		12.6065	11.415		12.3064	12.0775		11.3458	11.2694
YMR151W		8.39429	8.5644	4.64467	7.04941	7.49645	7.47644	7.04422	7.70631		7.04941	7.93088		8.39429	8.5644		7.47644	7.82668		6.48799	5.91361
YMR150C		9.92401	10.6551	10.0632	9.43768	9.28047	9.96251	9.09719	9.93399		9.43768	9.7796		9.92401	10.6551		9.96251	10.202		9.29833	9.82368
YMR152W		9.99558	10.9498	9.26258	9.32313	9.74067	9.74012	10.664	10.1353		9.32313	10.023		9.99558	10.9498		9.74012	10.9721		9.83953	9.84512
YMR153W		9.07152	8.69779	9.58257	9.4404	9.32661	9.64213	8.89444	9.19925		9.4404	9.24958		9.07152	8.69779		9.64213	9.51998		9.56282	9.50629
YMR153C-A		9.13002	8.7552	6.76411	9.84821	9.41123	9.96068	8.77776	9.19114		9.84821	9.69334		9.13002	8.7552		9.96068	9.87678		9.8274	9.68839
YMR154C		6.79074	7.26379	6.39988	7.81217	6.59896	7.30249	7.51668	7.01512		7.81217	7.66798		6.79074	7.26379		7.30249	8.0611		7.07125	7.1806
YMR155W		9.25677	9.74825	7.60635	9.0687	8.11218	9.1659	9.61538	9.24591		9.0687	9.43398		9.25677	9.74825		9.1659	9.9607		7.87603	8.09991
YMR156C		8.05173	8.85681	6.52081	7.67475	7.81568	8.04385	8.78456	8.20548		7.67475	8.01211		8.05173	8.85681		8.04385	8.75073		7.54747	7.6176
YMR157C		9.22253	9.21795	9.40856	8.57767	8.7066	9.23646	9.35743	9.37345		8.57767	9.10389		9.22253	9.21795		9.23646	9.81346		9.04157	9.01032
YMR158W		8.57965	8.62978	11.0221	9.00982	9.45745	9.56444	9.22268	9.54933		9.00982	9.09276		8.57965	8.62978		9.56444	9.87978		9.88992	10.1814
YMR158C-A		5.43817	7.62315	7.88694	8.40409	8.28808	7.00772	8.2657	9.46833		8.40409	8.90564		5.43817	7.62315		7.00772	8.00418		7.52623	7.45434
YMR158W-B		7.10362	8.42432	4.59303	7.60764	8.30099	6.37978	7.52172	8.27665		7.60764	7.49839		7.10362	8.42432		6.37978	7.91704		7.17082	6.94693
YMR159C		6.70301	8.04836	7.17209	7.18567	7.90058	6.01865	7.26357	8.05139		7.18567	7.10333		6.70301	8.04836		6.01865	7.49099		6.67388	6.44999
YMR160W		6.72067	8.17098	6.80991	7.62103	7.50775	7.0402	8.56353	8.82564		7.62103	8.34638		6.72067	8.17098		7.0402	8.49734		7.74271	7.65163
YMR161W		10.5824	10.0209	10.8892	10.3966	9.75252	10.2567	9.92449	9.64594		10.3966	10.3324		10.5824	10.0209		10.2567	10.5942		9.90586	9.89451
YMR162C		7.71726	7.96582	7.44586	7.19081	7.47112	8.17968	9.26983	9.23195		7.19081	8.07555		7.71726	7.96582		8.17968	7.5802		8.08582	7.86028
YMR163C		7.2076	6.95975	6.88216	7.48808	7.26092	7.85403	7.80327	7.84233		7.48808	7.86793		7.2076	6.95975		7.85403	7.38195		7.67373	7.39479
YMR164C		6.87827	7.32392	7.07021	6.59673	7.29793	7.56409	8.27779	8.10283		6.59673	10.3598		6.87827	7.32392		7.56409	8.69363		7.84895	7.7834
YMR165C		7.83436	8.41952	8.59073	8.56614	7.82451	7.86695	9.79538	9.7077		8.56614	8.93403		7.83436	8.41952		7.86695	8.24523		8.20346	8.14463
YMR166C		8.13777	8.10624	8.89073	7.67497	7.46419	8.13315	9.28415	8.47759		7.67497	8.46466		8.13777	8.10624		8.13315	8.62848		8.63274	8.45042
YMR167W		7.32144	7.43194	7.54429	8.12404	7.20411	7.96247	8.03905	7.42615		8.12404	8.11696		7.32144	7.43194		7.96247	8.65685		8.03506	7.97415
YMR168C		7.8417	8.2649	7.73698	8.62321	7.59743	8.42073	8.13722	7.95355		8.62321	8.59707		7.8417	8.2649		8.42073	8.81618		8.0405	8.13236
YMR169C		7.15295	12.4669	6.62082	7.6343	8.41903	7.28253	12.1191	11.594		7.6343	11.8424		7.15295	12.4669		7.28253	11.182		7.41187	7.52131
YMR170C		8.0215	10.9826	7.35984	8.172	9.13798	8.21417	11.7746	10.9032		8.172	10.1562		8.0215	10.9826		8.21417	10.4263		7.90829	8.05619
YMR171C		10.0323	9.90693	9.2835	9.94475	9.73545	9.74415	10.2997	10.5618		9.94475	9.74794		10.0323	9.90693		9.74415	9.35529		9.28535	9.26118
YMR172W		7.48029	7.55577	8.45379	7.80835	8.66091	7.93755	8.03437	9.04473		7.80835	7.80619		7.48029	7.55577		7.93755	7.81176		8.27841	8.25062
YMR172C-A		8.34325	7.84124	5.12698	8.14266	8.93206	8.22738	8.33358	9.31646		8.14266	8.04218		8.34325	7.84124		8.22738	7.79963		8.78018	9.08832
YMR173W		10.0465	11.3436	10.0729	11.3065	12.1584	10.8835	15.0275	14.8733		11.3065	13.2751		10.0465	11.3436		10.8835	15.3927		12.1669	12.5008
YMR173W-A		10.0499	11.6273	10.0638	11.2961	12.1548	10.9196	15.0779	14.9268		11.2961	13.2565		10.0499	11.6273		10.9196	15.4184		12.2916	12.5841
YMR174C		6.83289	14.4552	8.5479	8.12029	11.1614	7.36275	12.5552	12.5267		8.12029	9.88492		6.83289	14.4552		7.36275	10.5882		7.38872	8.11038
YMR175W		6.61948	15.9563	5.51257	5.88583	9.44014	5.47102	13.6294	12.8726		5.88583	7.39327		6.61948	15.9563		5.47102	7.75396		5.59036	6.00389
YMR175W-A		5.43936	12.1342	5.38813	3.68289	6.15474	4.2558	8.40432	7.7249		3.68289	3.4449		5.43936	12.1342		4.2558	5.8564		4.56799	4.4961
YMR176W		7.57807	7.62101	7.61243	7.50696	7.44736	8.12698	9.01224	8.73746		7.50696	7.31814		7.57807	7.62101		8.12698	7.66339		7.81683	7.81649
YMR177W		8.5852	6.97557	8.83988	8.13014	8.66278	8.63444	8.5937	7.47445		8.13014	7.44163		8.5852	6.97557		8.63444	9.07435		8.27968	8.3978
YMR178W		9.78818	9.34444	10.2851	9.48155	10.6927	10.1341	10.5118	11.7625		9.48155	9.68064		9.78818	9.34444		10.1341	10.7539		10.163	10.2193
YMR179W		7.28718	6.98244	8.04351	6.8238	7.58759	7.71103	7.04573	7.54449		6.8238	6.35601		7.28718	6.98244		7.71103	8.60023		8.58464	8.5689
YMR180C		7.79313	9.18392	8.60216	8.66577	8.94698	8.6773	10.0054	9.85583		8.66577	8.68645		7.79313	9.18392		8.6773	9.20281		8.12191	8.50492
YMR181C		10.3319	12.9093	9.11943	11.3746	11.9151	9.99317	13.2643	13.2085		11.3746	10.8735		10.3319	12.9093		9.99317	11.3715		9.89919	9.99053
YMR182C		8.84487	10.2428	8.20341	9.87114	9.48496	9.3711	12.3045	12.191		9.87114	9.01081		8.84487	10.2428		9.3711	8.11953		8.75725	8.58496
YMR182W-A		7.67975	7.38506	7.345	6.51024	8.19757	8.27617	9.89064	11.0023		6.51024	7.19425		7.67975	7.38506		8.27617	7.00813		6.73238	7.46784
YMR183C		11.0639	10.1705	11.7838	10.6298	10.5709	11.0071	9.10685	9.40227		10.6298	10.1881		11.0639	10.1705		11.0071	10.8831		11.1623	11.1498
YMR184W		9.24785	9.44321	10.093	10.2201	10.5765	9.13414	9.59742	10.3048		10.2201	10.1006		9.24785	9.44321		9.13414	9.681		9.68844	9.71473
YMR185W		7.65633	7.20714	8.452	8.37732	7.6675	8.70112	8.40938	9.01629		8.37732	5.27812		7.65633	7.20714		8.70112	6.04645		8.1061	7.86429
YMR186W		13.4149	13.0503	14.1064	13.6228	11.4721	14.5002	13.4499	13.2376		13.6228	13.9785		13.4149	13.0503		14.5002	14.012		14.1166	13.9875
YMR187C		7.90681	8.41402	7.99227	8.17598	8.26681	7.71079	7.79518	7.85252		8.17598	7.92183		7.90681	8.41402		7.71079	7.11356		7.42043	7.28714
YMR188C		8.48178	8.4197	10.8498	8.47103	10.0364	8.43141	8.80667	9.74251		8.47103	8.99311		8.48178	8.4197		8.43141	8.92852		10.022	10.033
YMR189W		11.0275	9.35466	8.38453	8.28292	10.5803	9.65162	8.22231	6.47038		8.28292	9.60477		11.0275	9.35466		9.65162	7.62212		8.63834	8.41295
YMR190C		6.81037	6.18959	7.3046	6.58623	6.39265	7.36354	7.82512	7.77643		6.58623	7.17606		6.81037	6.18959		7.36354	7.00795		7.83534	7.46983
YMR191W		10.3611	13.3663	9.33596	10.3287	9.37356	9.87825	12.1117	12.1195		10.3287	11.5019		10.3611	13.3663		9.87825	10.4596		8.93828	9.03766
YMR192W		7.71255	7.46511	8.35182	8.65986	7.71825	7.92546	7.7621	7.55003		8.65986	8.47988		7.71255	7.46511		7.92546	7.90416		8.24116	7.98461
YMR193W		8.02163	8.27349	10.5956	8.32749	9.22208	8.52231	8.33045	8.82161		8.32749	8.67607		8.02163	8.27349		8.52231	9.57289		9.68207	9.61018
YMR194W		13.0588	10.8466	13.6197	12.641	12.0358	12.8777	8.74204	9.349		12.641	10.6982		13.0588	10.8466		12.8777	10.3266		12.6836	12.6255
YMR193C-A		11.8646	9.73322	6.44723	10.7637	10.4844	9.73737	6.77803	7.16667		10.7637	8.8851		11.8646	9.73322		9.73737	7.06484		8.16409	8.55163
YMR194C-B		7.58399	11.0946	7.58827	8.09804	11.1275	8.18299	10.4392	10.8498		8.09804	10.1472		7.58399	11.0946		8.18299	8.81649		8.06311	7.94815
YMR194C-A		8.35265	8.74393	7.63513	6.79837	8.55897	7.94762	7.47798	7.12417		6.79837	8.41504		8.35265	8.74393		7.94762	7.12736		5.68347	6.99009
YMR195W		10.591	10.2833	9.93949	7.78563	13.0476	8.63678	12.8655	13.2664		7.78563	10.4804		10.591	10.2833		8.63678	8.51558		10.0742	9.98607
YMR196W		7.54694	10.6716	6.87728	8.55065	9.24963	7.80445	13.5235	13.6289		8.55065	10.6418		7.54694	10.6716		7.80445	10.6305		8.16335	8.49038
YMR197C		9.18639	10.2598	10.375	9.47881	10.3	9.28551	9.4019	10.112		9.47881	9.94938		9.18639	10.2598		9.28551	11.2834		9.57037	9.63293
YMR198W		7.54814	6.81564	8.17103	7.37319	7.66572	7.83774	6.28523	6.46639		7.37319	7.51575		7.54814	6.81564		7.83774	7.25317		8.51827	8.54013
YMR199W		9.17416	9.76878	9.34109	9.53813	9.32884	9.5448	8.08618	8.00789		9.53813	8.94299		9.17416	9.76878		9.5448	7.74908		9.92541	9.97958
YMR200W		11.0461	11.3978	11.2663	10.9908	10.9483	10.835	11.0199	11.1174		10.9908	11.204		11.0461	11.3978		10.835	11.4408		10.6508	10.6702
YMR201C		7.1398	7.37134	8.82725	8.44942	8.53158	7.80454	8.96132	9.92414		8.44942	9		7.1398	7.37134		7.80454	7.95792		8.20389	8.284
YMR202W		13.7439	12.5462	13.8445	14.515	11.9073	13.8858	12.3208	11.0837		14.515	14.1443		13.7439	12.5462		13.8858	11.9107		12.171	12.0418
YMR203W		12.79	12.1113	11.9487	12.4237	9.77498	12.6979	11.9431	11.1979		12.4237	12.2978		12.79	12.1113		12.6979	12.813		11.3403	11.4645
YMR204C		6.67718	7.34004	7.37598	5.73353	7.98318	7.01924	7.18706	7.22027		5.73353	7.05032		6.67718	7.34004		7.01924	7.66752		7.50204	7.70768
YMR205C		13.069	12.0792	12.6524	13.555	10.8387	13.4545	12.568	13.3166		13.555	12.8468		13.069	12.0792		13.4545	13.3453		11.6138	11.5003
YMR206W		6.92627	11.3004	3.03988	5.72049	7.84431	5.05647	11.1529	10.3139		5.72049	7.58768		6.92627	11.3004		5.05647	6.52421		5.46566	4.68328
YMR207C		6.79068	6.52617	7.29128	7.04214	6.56808	6.99504	7.56818	7.32975		7.04214	7.33058		6.79068	6.52617		6.99504	6.17531		7.15617	7.00117
YMR208W		10.9011	10.3874	10.8202	11.7506	9.29422	10.1664	10.2782	9.40514		11.7506	11.0166		10.9011	10.3874		10.1664	10.0048		10.0721	9.96484
YMR209C		9.8063	8.38383	9.61936	9.06081	8.73212	9.60464	8.38746	8.20787		9.06081	8.88937		9.8063	8.38383		9.60464	8.31217		8.94591	8.91288
YMR210W		9.21192	8.74938	8.25571	9.25415	8.74091	9.01889	9.99785	9.79363		9.25415	9.43921		9.21192	8.74938		9.01889	9.86896		9.06659	9.11408
YMR211W		8.63903	7.64507	8.86373	8.43493	8.16367	8.66587	7.55741	7.38958		8.43493	7.48334		8.63903	7.64507		8.66587	7.649		8.07058	7.85247
YMR212C		10.0074	8.3391	9.47064	9.8773	8.6803	10.5887	8.69472	9.15677		9.8773	9.27541		10.0074	8.3391		10.5887	9.38951		9.37409	9.42523
YMR213W		7.05941	7.2502	8.22466	6.77126	7.92588	7.11366	7.14024	7.49647		6.77126	6.62949		7.05941	7.2502		7.11366	6.84673		8.21623	8.23626
YMR214W		10.4587	9.32537	10.6214	10.3041	9.81473	10.4316	9.3563	9.35146		10.3041	10.0343		10.4587	9.32537		10.4316	9.84214		10.2665	10.1584
YMR215W		12.1258	10.4349	10.5859	10.8258	9.30865	12.2507	8.43803	7.84574		10.8258	9.74473		12.1258	10.4349		12.2507	10.0973		10.9614	10.7952
YMR216C		9.28362	9.1033	9.77116	8.88857	8.42582	9.73411	9.91342	9.33484		8.88857	8.54843		9.28362	9.1033		9.73411	9.09247		9.33159	9.1907
YMR217W		14.1357	11.2165	13.3544	13.2383	10.9849	13.9118	10.956	8.30113		13.2383	10.4753		14.1357	11.2165		13.9118	9.87722		12.5479	12.4319
YMR218C		7.71336	6.97026	8.10231	7.83086	7.11359	8.23027	7.30002	7.05607		7.83086	7.59207		7.71336	6.97026		8.23027	8.15969		8.07933	8.13576
YMR219W		6.77334	6.73346	8.1013	6.8431	7.74796	7.32672	8.33898	8.47816		6.8431	6.71271		6.77334	6.73346		7.32672	7.10479		8.42953	8.38079
YMR220W		10.5918	9.70005	11.0092	11.5223	9.5999	10.7381	9.69246	9.41475		11.5223	11.1859		10.5918	9.70005		10.7381	11.1944		10.3267	10.4142
YMR221C		10.8341	10.4854	9.62655	10.4691	8.24157	11.0196	9.39408	8.99511		10.4691	10.2723		10.8341	10.4854		11.0196	9.83002		9.72396	9.63636
YMR222C		10.0648	9.41929	9.53755	9.75069	8.91288	9.25494	8.8888	9.21725		9.75069	10.2036		10.0648	9.41929		9.25494	10.2447		9.41963	9.28097
YMR223W		9.20328	8.11231	8.71754	8.60288	7.47899	9.09065	7.3514	7.75469		8.60288	8.71477		9.20328	8.11231		9.09065	7.97693		8.59036	8.56064
YMR224C		7.88214	7.9873	7.84368	7.7644	7.53836	7.5619	7.4258	7.53854		7.7644	7.98959		7.88214	7.9873		7.5619	7.49462		7.9152	7.73281
YMR225C		9.40537	8.77482	10.6843	9.48449	9.7881	9.45892	9.36988	10.231		9.48449	9.59618		9.40537	8.77482		9.45892	9.49448		9.4253	9.84039
YMR226C		11.5762	11.9115	12.4308	11.3708	11.3401	11.5856	11.3972	11.614		11.3708	12.2372		11.5762	11.9115		11.5856	12.6416		11.741	11.9789
YMR227C		8.06884	7.5332	9.68355	7.24643	8.56719	8.02136	6.86353	7.46377		7.24643	7.32814		8.06884	7.5332		8.02136	7.67482		8.75838	8.69083
YMR228W		7.89525	8.17396	8.87009	8.226	8.07249	8.14907	7.86682	7.60027		8.226	8.06437		7.89525	8.17396		8.14907	8.07956		8.32225	8.39524
YMR229C		9.9929	7.55604	11.0073	9.99946	7.6216	10.7451	8.22691	6.21869		9.99946	5.29317		9.9929	7.55604		10.7451	5.27497		9.62333	9.3949
YMR230W		14.0345	12.4519	15.1487	13.569	12.4317	14.1327	9.60639	10.8487		13.569	12.0657		14.0345	12.4519		14.1327	11.5216		13.5352	13.5411
YMR230W-A		8.19385	4.89727	5.35722	5.84345	5.9232	6.25171	3.64206	4.24642		5.84345	5.29734		8.19385	4.89727		6.25171	2.23357		7.19804	7.12615
YMR231W		7.78419	7.59173	7.87644	7.92083	7.53779	8.27161	6.54754	6.23764		7.92083	8.49455		7.78419	7.59173		8.27161	8.42436		8.18184	7.99385
YMR232W		5.62123	5.11006	4.64806	5.70951	6.79134	6.13496	4.85805	4.24483		5.70951	6.79005		5.62123	5.11006		6.13496	4.94836		6.61148	6.81377
YMR233W		8.09362	7.20142	9.47872	8.69462	8.68768	8.95951	5.54767	6.70094		8.69462	8.26277		8.09362	7.20142		8.95951	8.13023		8.68267	8.94931
YMR234W		9.0209	7.39004	9.21781	8.96553	8.73789	9.101	7.94704	8.82919		8.96553	8.56965		9.0209	7.39004		9.101	8.3328		8.91806	8.9479
YMR235C		11.7196	9.89832	11.9913	11.4945	10.4991	12.2794	9.46261	9.24651		11.4945	10.9982		11.7196	9.89832		12.2794	11.1026		11.7188	11.6662
YMR236W		11.1924	10.8323	11.7588	11.0327	11.369	11.2469	9.8663	9.80562		11.0327	11.2358		11.1924	10.8323		11.2469	11.4297		10.5487	10.7105
YMR237W		9.94717	9.29845	9.66647	9.48342	8.81266	10.0023	9.48491	9.2087		9.48342	9.97363		9.94717	9.29845		10.0023	10.6896		9.85836	9.86369
YMR238W		10.4818	10.6399	10.1656	11.1236	9.02622	10.5627	10.613	9.05378		11.1236	10.0703		10.4818	10.6399		10.5627	10.4806		9.77037	9.81822
YMR239C		8.14659	6.70597	10.2388	7.81697	8.24444	9.34118	6.3514	4.55051		7.81697	5.27579		8.14659	6.70597		9.34118	4.86703		9.20357	8.95324
YMR240C		6.98772	7.47995	8.65244	7.68643	9.27293	7.78248	7.11463	7.88684		7.68643	8.04745		6.98772	7.47995		7.78248	7.20723		8.50537	8.51516
YMR241W		11.7655	11.621	12.1256	12.0758	11.3322	12.125	9.64205	8.87286		12.0758	10.9917		11.7655	11.621		12.125	9.1359		11.3839	11.308
YMR242C		15.0018	12.4547	14.6658	14.055	12.5265	14.5282	9.65369	10.1306		14.055	12.3472		15.0018	12.4547		14.5282	11.4508		14.2854	14.3126
YMR242W-A		9.327	7.33615	6.42761	7.73696	7.8852	8.0346	7.61934	8.31681		7.73696	7.8083		9.327	7.33615		8.0346	7.03335		4.53146	4.45957
YMR243C		13.09	11.8095	11.739	11.9679	11.295	13.2713	11.3135	11.2913		11.9679	10.8477		13.09	11.8095		13.2713	11.4366		11.5373	11.5201
YMR244W		5.79172	5.8785	5.66448	4.94834	7.85501	5.45505	8.04447	6.52933		4.94834	6.0139		5.79172	5.8785		5.45505	3.99557		3.92198	4.6277
YMR245W		8.89589	9.35322	5.37073	9.15982	10.3773	8.43312	9.56609	10.7225		9.15982	8.26296		8.89589	9.35322		8.43312	9.32517		8.89687	8.80226
YMR244C-A		9.36987	9.77905	10.4939	9.11685	10.9283	8.95792	10.0446	11.3628		9.11685	9.1047		9.36987	9.77905		8.95792	10.0351		9.7216	9.74674
YMR246W		12.704	11.4367	12.4303	11.2215	12.157	12.3104	12.5788	12.7287		11.2215	9.31103		12.704	11.4367		12.3104	10.9431		11.6997	11.5174
YMR247C		8.33644	7.85129	7.8627	8.76138	7.04913	8.86549	8.20399	8.19386		8.76138	9.25306		8.33644	7.85129		8.86549	7.85309		8.28632	8.24599
YMR247W-A		6.74525	7.95056	5.67353	7.17919	6.96578	6.09201	9.03437	9.49672		7.17919	7.02526		6.74525	7.95056		6.09201	7.82781		4.00539	4.93351
YMR250W		7.36926	12.4354	6.8007	9.39721	10.5275	7.09073	13.6555	13.8185		9.39721	11.4407		7.36926	12.4354		7.09073	12.4329		9.29345	9.84923
YMR251W-A		14.6414	17.5562	14.1012	15.0238	15.1214	12.0835	17.0713	17.4165		15.0238	16.544		14.6414	17.5562		12.0835	15.8467		13.7933	14.1351
YMR252C		10.3146	10.0402	9.38795	9.2209	10.3696	9.5581	10.8554	11.2197		9.2209	10.3601		10.3146	10.0402		9.5581	9.51066		9.56882	9.56059
YMR253C		8.85645	9.77621	7.65485	8.73961	9.27247	8.3336	10.3818	10.7023		8.73961	9.71867		8.85645	9.77621		8.3336	9.04672		8.40118	8.47971
YMR254C		6.5122	8.15474	4.648	6.01876	7.51572	5.86364	7.39227	8.34456		6.01876	6.76566		6.5122	8.15474		5.86364	5.71148		6.07378	6.73886
YMR255W		9.5361	9.76763	10.7529	10.0489	10.4441	9.59522	9.09601	9.84386		10.0489	9.65991		9.5361	9.76763		9.59522	9.83841		9.74236	10.0223
YMR256C		11.2773	13.6582	12.3089	11.6439	10.3205	10.1727	12.8422	13.697		11.6439	11.936		11.2773	13.6582		10.1727	10.1803		10.945	11.0307
YMR257C		7.36589	8.09278	7.13092	6.95643	7.11381	7.61054	8.29786	7.87496		6.95643	7.61602		7.36589	8.09278		7.61054	7.29334		7.43655	7.21266
YMR258C		8.45163	9.31109	8.79411	8.8823	8.82731	8.75089	9.98031	9.4598		8.8823	9.20475		8.45163	9.31109		8.75089	10.3594		8.67137	8.74011
YMR259C		8.72705	7.60711	8.76736	8.63131	7.0984	9.19282	7.05354	6.33973		8.63131	6.86186		8.72705	7.60711		9.19282	6.26901		8.35129	8.27459
YMR260C		12.8378	11.0755	14.3138	12.1906	11.8305	13.1954	8.9746	10.4961		12.1906	11.0249		12.8378	11.0755		13.1954	11.7709		13.6176	13.7213
YMR261C		9.71598	9.49645	8.76827	9.81367	8.93107	9.31354	11.5513	11.4071		9.81367	11.9701		9.71598	9.49645		9.31354	11.2636		9.36751	9.42234
YMR262W		8.94608	9.62747	8.6977	8.56883	9.13414	8.14616	10.0628	9.14583		8.56883	10.4584		8.94608	9.62747		8.14616	9.99807		8.41468	8.45266
YMR263W		8.66445	8.68302	9.80557	9.21363	9.55139	8.38193	6.57583	7.2237		9.21363	8.94348		8.66445	8.68302		8.38193	8.42783		9.38336	9.19117
YMR264W		10.9931	11.3092	11.2158	10.6346	11.174	11.1309	11.3165	11.7632		10.6346	10.3514		10.9931	11.3092		11.1309	10.8921		10.5029	10.5875
YMR265C		8.30309	8.17621	7.59916	8.55279	9.22584	8.64921	9.08726	8.88766		8.55279	8.41318		8.30309	8.17621		8.64921	10.1885		7.8047	7.75418
YMR266W		10.9257	8.66937	9.93145	11.5026	8.35419	11.0712	10.6273	9.29381		11.5026	10.3497		10.9257	8.66937		11.0712	10.3056		9.18436	9.1004
YMR267W		8.86821	9.54608	10.3971	8.98035	8.95773	9.26056	8.79389	8.58318		8.98035	9.31406		8.86821	9.54608		9.26056	9.98658		9.9243	9.79612
YMR268C		7.20025	7.30135	8.08116	6.91509	7.83468	7.85972	7.429	7.32691		6.91509	6.43337		7.20025	7.30135		7.85972	6.41447		7.89073	7.73203
YMR269W		7.92181	5.22264	10.8395	7.29926	9.53928	7.45851	5.97888	7.50701		7.29926	5.42117		7.92181	5.22264		7.45851	5.25144		9.17532	9.39788
YMR270C		8.8479	7.57698	10.0001	9.05374	9.14839	9.31595	7.18045	7.44271		9.05374	8.47904		8.8479	7.57698		9.31595	8.72488		9.2244	9.22194
YMR271C		8.06197	10.7989	7.95003	7.78725	10.2716	7.99481	12.7741	13.705		7.78725	7.98015		8.06197	10.7989		7.99481	10.3394		6.84493	7.51847
YMR272W-A		12.3956	12.3668	7.74753	11.7504	11.9433	11.146	13.5388	14.181		11.7504	12.5009		12.3956	12.3668		11.146	10.1684		11.9571	12.2013
YMR272C		11.9272	11.7078	10.7033	11.235	11.3665	10.6871	13.093	13.7587		11.235	11.8782		11.9272	11.7078		10.6871	9.67503		11.2448	11.4126
YMR272W-B		7.16029	6.20463	6.08857	5.65081	6.56187	6.25651	6.77134	6.75422		5.65081	6.84166		7.16029	6.20463		6.25651	6.0198		8.00539	7.1559
YMR273C		7.3544	7.42398	8.40668	7.88379	7.70573	7.96669	8.07245	8.19828		7.88379	7.97827		7.3544	7.42398		7.96669	8.52447		8.76238	8.73996
YMR274C		9.42628	8.3927	8.60601	8.65729	8.2282	9.17169	7.05702	7.13909		8.65729	9.09422		9.42628	8.3927		9.17169	8.6387		7.85643	8.07267
YMR275C		8.54502	7.92443	8.75958	8.38284	7.7715	8.5175	9.4269	8.55123		8.38284	8.93166		8.54502	7.92443		8.5175	9.48857		8.7456	8.49013
YMR276W		11.8715	11.4956	11.9863	11.1761	11.0266	11.1996	11.8685	11.1031		11.1761	11.4989		11.8715	11.4956		11.1996	11.7		11.4781	11.3989
YMR277W		9.47854	8.64231	10.4493	9.12619	8.89515	9.66952	9.11429	9.00524		9.12619	8.63201		9.47854	8.64231		9.66952	8.48549		9.81415	9.74563
YMR278W		8.25076	8.72369	8.51398	7.95874	8.95931	8.53591	11.3324	11.3375		7.95874	8.47497		8.25076	8.72369		8.53591	9.75695		8.99727	8.78613
YMR279C		7.80237	8.4957	4.73469	5.9477	7.9653	8.07783	10.4698	9.68144		5.9477	7.2643		7.80237	8.4957		8.07783	7.68093		8.26576	8.01641
YMR282C		8.17002	7.98652	8.56432	8.63139	7.77203	8.31211	7.48133	7.87736		8.63139	8.8032		8.17002	7.98652		8.31211	7.5467		8.3446	8.54064
YMR283C		7.67162	7.2116	8.29883	8.18747	7.54547	7.92488	7.48407	7.91157		8.18747	7.9575		7.67162	7.2116		7.92488	8.26363		7.71401	7.76077
YMR284W		7.00853	7.863	7.70212	7.74692	7.28639	7.36034	7.64542	8.2983		7.74692	8.13614		7.00853	7.863		7.36034	8.60181		7.8935	8.05724
YMR285C		9.2446	7.89052	9.28893	8.77173	9.2952	8.70168	7.99613	8.07976		8.77173	8.66712		9.2446	7.89052		8.70168	8.67262		8.96283	8.93351
YMR286W		10.0834	10.1056	11.4461	10.1078	10.8252	10.2422	10.2585	11.5172		10.1078	10.1171		10.0834	10.1056		10.2422	10.3069		10.3372	10.5833
YMR287C		6.52278	6.50436	7.67781	6.75879	7.20925	7.02409	7.15282	6.97429		6.75879	7.16992		6.52278	6.50436		7.02409	7.4212		7.84344	7.78645
YMR288W		7.59653	7.07212	8.20404	7.54532	7.21033	7.76346	8.09113	8.18459		7.54532	7.05552		7.59653	7.07212		7.76346	7.3851		7.76883	7.7434
YMR289W		8.83504	9.04338	9.69464	8.86876	8.92281	9.05524	7.21833	7.44114		8.86876	8.79406		8.83504	9.04338		9.05524	9.52624		8.9525	9.18689
YMR290W-A		10.7731	8.36602	6.06148	9.81114	8.48895	10.2496	8.37606	8.48466		9.81114	6.90697		10.7731	8.36602		10.2496	6.15644		8.94183	8.70488
YMR290C		11.6564	8.99461	11.8235	11.1832	9.15247	11.5578	8.58178	6.48864		11.1832	7.14486		11.6564	8.99461		11.5578	7.2908		10.9616	10.6648
YMR291W		8.09268	8.90989	8.29715	8.89893	8.53998	7.97279	11.3173	11.1275		8.89893	10.6134		8.09268	8.90989		7.97279	7.48195		7.78546	7.86815
YMR292W		12.0576	11.6866	10.7671	11.0789	9.76184	11.5713	9.54061	9.36541		11.0789	10.3125		12.0576	11.6866		11.5713	10.2762		10.5116	10.5242
YMR293C		7.84657	7.89981	7.9368	7.51424	7.93049	7.64405	8.44825	8.45273		7.51424	8.0967		7.84657	7.89981		7.64405	8.11697		7.84821	7.8862
YMR294W		6.6148	6.78111	9.0937	7.75082	8.59358	7.38892	7.45615	8.76692		7.75082	7.22415		6.6148	6.78111		7.38892	7.02082		8.44434	8.25698
YMR294W-A		11.8653	11.7955	6.54734	12.6289	12.1679	11.8189	12.8236	13.2812		12.6289	11.9271		11.8653	11.7955		11.8189	11.8923		11.8153	11.9176
YMR295C		12.16	12.0689	12.8734	12.6233	12.3369	11.8894	13.05	13.5818		12.6233	11.9109		12.16	12.0689		11.8894	12.0106		11.6562	11.7794
YMR296C		12.0756	10.8475	11.5829	11.3962	9.98919	11.4863	10.6787	9.71171		11.3962	11.1251		12.0756	10.8475		11.4863	10.6828		11.057	10.9464
YMR297W		12.9744	14.81	11.9663	12.503	12.6234	13.0845	14.7414	14.5358		12.503	13.4466		12.9744	14.81		13.0845	14.2209		12.1995	12.2938
YMR298W		11.3405	10.8257	10.924	11.0047	11.2346	11.3493	12.1316	12.774		11.0047	10.942		11.3405	10.8257		11.3493	12.2806		11.3032	11.3622
YMR299C		8.29211	7.326	9.20262	8.57005	8.91654	8.62121	7.42735	7.71504		8.57005	8.89835		8.29211	7.326		8.62121	8.5556		8.73497	9.04223
YMR300C		12.5169	9.33907	10.4804	11.8276	11.063	11.295	8.57052	8.26544		11.8276	11.1764		12.5169	9.33907		11.295	9.11173		10.6376	10.4357
YMR301C		9.6517	8.8119	9.21557	8.7679	9.08809	9.11505	7.41561	7.01998		8.7679	7.96053		9.6517	8.8119		9.11505	7.68947		9.07071	8.80702
YMR302C		8.44445	9.51602	8.75758	9.018	8.0435	8.2653	9.83542	9.78186		9.018	9.98396		8.44445	9.51602		8.2653	9.12856		9.01721	9.1408
YMR303C		13.8428	18.4345	11.9176	12.5449	11.417	14.4749	15.6894	16.3663		12.5449	11.9343		13.8428	18.4345		14.4749	14.5355		13.2057	13.1344
YMR304W		7.59009	9.4698	7.86076	8.00696	8.18897	8.01413	10.6689	10.9204		8.00696	9.52789		7.59009	9.4698		8.01413	9.85136		8.04926	8.28352
YMR304C-A		13.287	11.1401	11.8185	13.435	8.63514	12.7807	10.7176	10.737		13.435	11.7797		13.287	11.1401		12.7807	11.7643		12.1059	12.2811
YMR305C		14.2717	12.1318	12.4362	14.3536	9.80154	13.9991	11.8024	11.9731		14.3536	12.6114		14.2717	12.1318		13.9991	13.0038		12.4547	12.5097
YMR306W		5.88482	5.96544	4.98876	5.96344	5.22591	6.55545	9.10626	8.65481		5.96344	5.32534		5.88482	5.96544		6.55545	7.06352		6.10977	5.99207
YMR306C-A		6.30785	7.52802	5.88813	6.05212	6.26063	6.57052	9.79664	9.43974		6.05212	6.26933		6.30785	7.52802		6.57052	8.41771		5.88992	6.19654
YMR307W		15.2453	13.33	13.4667	14.4162	11.7447	15.2651	12.3917	12.8796		14.4162	12.5061		15.2453	13.33		15.2651	14.0299		13.7528	13.7465
YMR307C-A		15.6517	13.7324	8.94239	14.7009	11.8842	15.5468	12.3249	12.8578		14.7009	12.7391		15.6517	13.7324		15.5468	14.3502		14.1435	14.1181
YMR308C		10.8289	9.06739	10.8926	10.7125	9.07611	11.1801	9.64101	9.7209		10.7125	9.68682		10.8289	9.06739		11.1801	9.24821		10.5066	10.2956
YMR309C		11.0642	9.49306	11.6989	11.1749	9.44726	11.3696	9.28761	8.46799		11.1749	9.81441		11.0642	9.49306		11.3696	8.95485		10.7152	10.6409
YMR310C		10.7013	9.22193	10.481	10.0138	8.7758	10.4592	8.84561	7.58325		10.0138	7.75677		10.7013	9.22193		10.4592	7.34446		9.63503	9.45825
YMR311C		9.90236	10.5355	11.2768	10.0455	11.0223	9.53703	10.9475	12.1686		10.0455	10.507		9.90236	10.5355		9.53703	11.2051		11.0303	10.9699
YMR312W		10.6155	10.22	9.57425	9.54092	8.31901	10.3438	8.30921	7.66483		9.54092	8.74283		10.6155	10.22		10.3438	8.86708		9.6969	9.61519
YMR313C		8.97882	8.88391	8.27097	8.81745	8.95022	8.88089	10.1517	10.6694		8.81745	9.67192		8.97882	8.88391		8.88089	9.21967		8.69631	8.67763
YMR314W		12.0726	11.6664	12.3609	12.4109	11.178	11.8959	11.0432	11.1801		12.4109	12.2813		12.0726	11.6664		11.8959	12.9297		11.8158	11.7891
YMR315W		10.5175	12.046	9.76237	11.7089	10.8373	10.538	12.812	12.77		11.7089	12.5182		10.5175	12.046		10.538	14.9693		11.299	11.3457
YMR315W-A		6.58429	6.28063	6.16457	7.67829	8.26942	6.69321	9.40361	8.26323		7.67829	7.35624		6.58429	6.28063		6.69321	7.47016		4.42043	5.34854
YMR316W		8.2317	7.61017	8.48515	13.4963	8.82094	8.65335	10.2807	9.36626		13.4963	10.6383		8.2317	7.61017		8.65335	7.81384		7.58607	7.69172
YMR316C-A		7.90194	7.15379	5.79502	13.0828	8.51088	8.55444	9.86726	9.4599		13.0828	10.3555		7.90194	7.15379		8.55444	7.22183		7.69727	8.13996
YMR317W		7.33265	8.10281	3.79815	8.07535	8.24213	8.14547	9.42615	9.45402		8.07535	8.21757		7.33265	8.10281		8.14547	8.93319		6.99652	7.10385
YMR316C-B		8.54739	8.62971	7.12767	8.52126	8.71378	8.25771	10.0518	10.4441		8.52126	8.85044		8.54739	8.62971		8.25771	9.18518		7.29617	7.73886
YMR318C		12.518	10.3854	12.3801	11.4446	10.1923	12.6705	11.9996	10.1811		11.4446	11.4487		12.518	10.3854		12.6705	13.8785		12.1633	12.1787
YMR319C		9.90582	8.36221	9.9974	9.97097	13.1294	10.5089	10.3592	10.4181		9.97097	8.76905		9.90582	8.36221		10.5089	10.4315		9.69111	8.81247
YMR320W		8.57423	8.13181	4.58607	10.5707	11.1042	8.69376	10.1515	9.66502		10.5707	8.73736		8.57423	8.13181		8.69376	8.02274		7.56179	7.30547
YNL331C		8.12288	8.14702	7.71774	8.94558	9.91034	8.31427	9.42724	9.254		8.94558	8.69892		8.12288	8.14702		8.31427	11.7085		7.4582	7.4519
YNL330C		10.0312	9.43079	10.5307	9.78501	9.8657	9.97717	9.76317	10.3855		9.78501	9.80638		10.0312	9.43079		9.97717	10.3609		10.1003	10.2326
YNL329C		8.64457	8.60447	8.26127	8.62764	8.12205	8.87768	8.98128	8.76173		8.62764	8.89692		8.64457	8.60447		8.87768	8.17481		8.38788	8.33201
YNL326C		8.86828	9.03666	8.86498	8.7516	8.66684	8.97279	7.93009	8.21942		8.7516	9.379		8.86828	9.03666		8.97279	8.34341		8.44168	8.69172
YNL324W		5.0783	7.21352	4.3661	6.66086	6.43484	6.77283	6.52914	6.30859		6.66086	6.28085		5.0783	7.21352		6.77283	7.16399		7.06952	7.11793
YNL325C		6.79478	6.87601	7.24114	7.23375	6.96091	7.24291	6.60616	7.04226		7.23375	7.29693		6.79478	6.87601		7.24291	7.65271		7.45285	7.56366
YNL323W		9.93169	9.33052	10.0781	9.24111	8.86287	9.92189	9.62454	10.1885		9.24111	9.26749		9.93169	9.33052		9.92189	9.06366		9.55873	9.57304
YNL322C		11.6256	12.0592	11.4329	11.3347	11.1019	11.2491	13.5603	13.964		11.3347	11.4344		11.6256	12.0592		11.2491	11.4091		11.1191	11.221
YNL321W		9.33956	9.61722	8.57422	9.65136	7.84532	9.48191	11.333	11.3		9.65136	10.7322		9.33956	9.61722		9.48191	9.52798		8.40608	8.33057
YNL320W		10.3653	9.84558	9.05238	9.99545	9.49155	10.0816	9.09751	8.98178		9.99545	10.3026		10.3653	9.84558		10.0816	10.9199		9.03545	9.07101
YNL319W		6.84925	5.25088	5.50331	6.00809	7.07434	5.03665	4.00462	4.02403		6.00809	6.51552		6.84925	5.25088		5.03665	4.28243		6.56061	6.56672
YNL315C		9.11264	8.59332	10.3957	9.14829	9.44134	9.60037	9.94036	9.92866		9.14829	9.20785		9.11264	8.59332		9.60037	10.2917		9.96294	9.96593
YNL313C		9.40456	8.44095	10.1605	9.3285	8.28575	9.8605	7.55578	5.76825		9.3285	7.354		9.40456	8.44095		9.8605	7.33925		9.38329	9.23002
YNL312W		10.6163	10.5948	10.6728	9.83994	9.81383	10.4825	9.35723	9.50791		9.83994	10.006		10.6163	10.5948		10.4825	11.4953		10.5114	10.5393
YNL311C		7.28043	7.29155	7.69958	7.29608	8.6525	7.84945	8.01919	7.4949		7.29608	7.42641		7.28043	7.29155		7.84945	7.54268		7.70641	7.72894
YNL310C		9.10667	9.11135	10.5035	9.07209	9.65264	9.33868	9.36288	9.87578		9.07209	9.50791		9.10667	9.11135		9.33868	10.4045		9.67053	9.6295
YNL309W		7.95345	8.46592	8.74019	7.16084	8.2296	7.9784	7.62958	7.46603		7.16084	8.13761		7.95345	8.46592		7.9784	8.14505		8.39624	8.28461
YNL308C		9.93862	8.21236	12.0538	8.86794	10.5959	10.0711	8.12413	8.49201		8.86794	6.12818		9.93862	8.21236		10.0711	6.27394		11.032	10.9814
YNL307C		12.4251	11.8062	11.6144	12.2162	10.3549	12.4238	10.8305	10.217		12.2162	12.0167		12.4251	11.8062		12.4238	12.1201		10.8718	10.8234
YNL306W		10.3301	10.4838	11.317	9.87959	10.3437	10.7151	10.8749	11.3519		9.87959	10.0748		10.3301	10.4838		10.7151	11.1395		10.7995	10.6511
YNL305C		10.2686	12.5444	8.97673	10.0934	10.3808	9.81222	13.5782	13.8424		10.0934	11.6933		10.2686	12.5444		9.81222	12.5284		9.29005	9.27084
YNL304W		7.63589	7.87248	8.31965	7.67268	8.5492	7.56325	6.74487	6.75475		7.67268	8.35858		7.63589	7.87248		7.56325	8.07692		8.11182	8.11489
YNL303W		11.0242	8.20698	7.00596	9.8807	7.92751	9.43396	5.46179	6.31992		9.8807	8.70732		11.0242	8.20698		9.43396	7.22375		12.3744	12.2112
YNL302C		14.9254	12.6372	15.4218	14.0251	12.662	14.5715	9.38556	10.3551		14.0251	12.5743		14.9254	12.6372		14.5715	11.7419		13.9918	13.9968
YNL301C		13.007	11.0164	13.9756	12.4214	11.1538	13.4515	9.0752	9.92983		12.4214	11.1898		13.007	11.0164		13.4515	10.4482		12.8549	12.8295
YNL300W		12.9739	12.4595	12.4532	11.5495	11.6088	12.654	8.74019	8.16656		11.5495	10.7864		12.9739	12.4595		12.654	9.04321		11.978	12.2996
YNL299W		8.00342	7.47986	9.43329	8.19676	8.47161	8.61157	6.69154	6.70238		8.19676	6.36099		8.00342	7.47986		8.61157	5.88396		8.70463	8.55174
YNL298W		8.67404	7.32885	8.89891	8.12457	8.11993	8.48524	7.87436	8.04153		8.12457	9.21447		8.67404	7.32885		8.48524	7.81159		8.71332	8.63197
YNL296W		5.32349	6.93247	4.54425	8.14752	7.19333	7.47167	9.16248	8.75739		8.14752	7.91625		5.32349	6.93247		7.47167	8.57526		6.783	7.32778
YNL297C		8.31995	7.86067	8.07942	8.37493	7.32278	8.55166	8.78955	8.64226		8.37493	8.76173		8.31995	7.86067		8.55166	8.65565		8.33137	8.33948
YNL295W		7.87187	8.11535	8.63463	7.51666	8.06206	8.0083	8.75309	9.10937		7.51666	8.02355		7.87187	8.11535		8.0083	8.44104		8.51418	8.38316
YNL294C		9.59175	9.59326	9.35816	10.2571	9.79582	9.94848	9.63679	9.77126		10.2571	10.0887		9.59175	9.59326		9.94848	10.605		9.06104	9.05023
YNL293W		7.6611	8.25873	8.19211	7.74269	8.95284	7.47258	8.46581	8.19845		7.74269	8.38855		7.6611	8.25873		7.47258	9.0734		7.87447	8.11702
YNL292W		9.48135	7.91274	10.6411	9.52143	8.58454	10.0143	7.51571	7.61534		9.52143	8.24646		9.48135	7.91274		10.0143	7.86133		9.46353	9.54325
YNL291C		9.73765	9.12093	8.95837	9.27937	8.20277	10.0517	7.76185	7.80604		9.27937	9.26647		9.73765	9.12093		10.0517	9.42989		8.99352	9.00652
YNL290W		9.59371	8.95967	10.6874	9.48966	9.77963	9.7001	8.30374	8.77008		9.48966	9.46797		9.59371	8.95967		9.7001	9.7821		10.0253	10.0297
YNL289W		9.07712	10.1885	10.1361	9.02168	11.3995	8.93181	7.45584	6.41635		9.02168	9.8438		9.07712	10.1885		8.93181	6.03331		10.1753	10.4336
YNL288W		11.0847	10.0924	10.2591	10.9509	9.4295	10.4316	10.5319	10.2823		10.9509	11.1381		11.0847	10.0924		10.4316	10.6179		9.49879	9.35528
YNL287W		10.7919	9.83473	10.6291	10.9827	9.37642	10.9416	10.7734	10.9194		10.9827	11.1464		10.7919	9.83473		10.9416	10.5908		10.6836	10.6354
YNL286W		8.01709	8.39052	9.64131	8.66778	9.08602	8.55612	7.99862	9.32358		8.66778	8.23023		8.01709	8.39052		8.55612	8.95723		8.92234	9.03807
YNL285W		5.98721	7.78129	4.3043	7.6337	8.85171	7.17467	7.39306	8.3139		7.6337	7.9942		5.98721	7.78129		7.17467	7.94439		2.63616	2.56427
YNL284C		9.516	9.53359	10.516	9.48274	10.1136	9.41583	9.41837	9.71168		9.48274	10.1431		9.516	9.53359		9.41583	10.1229		10.0396	10.2465
YNL283C		10.9053	10.0412	9.47254	10.9711	8.45663	11.0056	9.67823	9.99797		10.9711	11.4541		10.9053	10.0412		11.0056	10.9882		9.67107	9.59647
YNL282W		8.66291	8.50242	9.96376	9.14402	8.56801	8.93338	7.92349	8.11679		9.14402	8.37088		8.66291	8.50242		8.93338	7.70247		8.4675	8.54761
YNL281W		11.2898	11.7342	13.038	12.6699	11.4443	12.5944	12.6123	12.9879		12.6699	12.0701		11.2898	11.7342		12.5944	12.3547		11.971	11.9931
YNL280C		11.6449	11.5799	10.5374	11.7375	9.63639	11.6807	11.5704	10.4818		11.7375	11.3426		11.6449	11.5799		11.6807	9.98297		10.6357	10.5622
YNL279W		7.62722	7.2701	4.12477	8.63148	8.64423	7.78644	6.73246	5.58094		8.63148	10.4889		7.62722	7.2701		7.78644	7.9491		7.61199	8.38618
YNL278W		7.34139	7.91949	7.15925	6.54684	6.8101	7.66645	7.93226	6.97985		6.54684	7.16313		7.34139	7.91949		7.66645	6.45404		7.63718	7.56529
YNL277W-A		4.98445	7.35072	5.85722	0.991011	8.70236	4.25022	6.96398	6.56835		0.991011	4.60546		4.98445	7.35072		4.25022	4.58653		3.61308	3.54119
YNL277W		8.20979	9.18922	9.24841	9.21488	12.5397	8.74103	9.32818	9.65128		9.21488	9.28096		8.20979	9.18922		8.74103	8.84916		8.20947	8.05829
YNL276C		7.84356	8.62139	6.93075	8.44659	12.5084	8.2848	9.36284	9.77922		8.44659	8.40015		7.84356	8.62139		8.2848	8.13382		7.90351	8.17451
YNL275W		8.865	8.21763	8.15015	8.65264	7.30875	8.73925	8.2924	7.38219		8.65264	9.19721		8.865	8.21763		8.73925	7.35327		7.75778	7.94595
YNL274C		7.15601	11.0707	7.6683	8.65223	9.05498	7.15555	12.3946	12.3153		8.65223	10.5514		7.15601	11.0707		7.15555	11.3138		8.98052	9.63679
YNL273W		7.5309	7.25023	7.60017	6.99127	6.74124	8.11188	7.3915	7.05988		6.99127	7.09418		7.5309	7.25023		8.11188	7.90712		7.99839	8.05408
YNL272C		7.87085	7.65847	9.20386	8.42772	8.68	8.90217	7.94732	8.24256		8.42772	8.35616		7.87085	7.65847		8.90217	9.02001		9.1472	9.206
YNL270C		5.45779	12.4286	4.74559	3.47895	6.06192	5.52037	7.9261	8.0756		3.47895	3.88732		5.45779	12.4286		5.52037	5.79367		5.46984	5.16092
YNL268W		11.5975	11.4891	10.9981	11.1654	11.301	11.2893	11.1948	10.5833		11.1654	10.7592		11.5975	11.4891		11.2893	10.3391		10.8338	10.6186
YNL267W		8.80219	8.62186	8.92053	9.04216	8.47749	9.1701	8.88642	8.94244		9.04216	8.84394		8.80219	8.62186		9.1701	9.1912		9.01885	8.89999
YNL266W		8.91406	9.37455	6.65866	9.54368	9.38712	9.02595	8.02921	8.51227		9.54368	9.774		8.91406	9.37455		9.02595	10.5365		9.50547	9.65597
YNL265C		9.02529	9.12307	9.66194	9.05061	9.10036	8.67344	7.92912	8.49821		9.05061	9.36974		9.02529	9.12307		8.67344	10.2749		8.97484	9.21691
YNL264C		9.5381	8.70455	9.65788	9.57261	9.38434	9.6089	9.92223	10.7768		9.57261	9.57799		9.5381	8.70455		9.6089	9.77377		9.42965	9.27746
YNL263C		11.6743	11.2882	10.3943	11.0764	10.1665	11.5176	10.2758	10.2351		11.0764	11.2864		11.6743	11.2882		11.5176	12.055		10.4636	10.4907
YNL262W		7.69719	7.75774	8.15011	6.42827	6.72638	8.13227	6.66595	6.54004		6.42827	6.12924		7.69719	7.75774		8.13227	6.84668		8.43207	8.52559
YNL261W		9.1448	8.89106	8.81498	8.72812	8.21435	9.30273	7.75684	6.96787		8.72812	8.5136		9.1448	8.89106		9.30273	9.70992		8.95025	9.00818
YNL260C		8.69077	8.71841	9.25243	8.87169	8.52058	8.86071	7.61207	8.58143		8.87169	8.88049		8.69077	8.71841		8.86071	12.0241		8.90793	8.55427
YNL259C		9.28173	11.0448	11.3609	10.0757	11.5833	10.3302	9.15135	10.5954		10.0757	9.36285		9.28173	11.0448		10.3302	10.3052		10.2513	10.5474
YNL258C		8.14747	8.31702	8.86825	8.63477	8.4255	8.86819	7.42095	8.21796		8.63477	8.92095		8.14747	8.31702		8.86819	9.55146		9.2346	9.25275
YNL257C		7.56794	7.69251	8.05495	7.93133	7.537	8.44038	7.97144	7.88852		7.93133	8.17341		7.56794	7.69251		8.44038	8.44746		8.39469	8.2512
YNL256W		9.7813	8.0032	9.70948	9.38842	8.90589	9.74606	7.65218	6.6176		9.38842	8.12479		9.7813	8.0032		9.74606	7.98881		8.9601	8.72806
YNL255C		13.7239	12.0343	14.6522	12.8544	12.6528	13.4884	11.1486	11.4071		12.8544	11.0872		13.7239	12.0343		13.4884	11.5121		13.2138	13.3582
YNL254C		8.17066	7.75069	8.44914	8.29738	11.7832	8.35859	8.51518	8.70451		8.29738	7.42847		8.17066	7.75069		8.35859	7.39622		8.12913	7.75006
YNL253W		8.53741	8.22145	8.43216	8.57693	9.47003	8.50356	7.25237	7.28055		8.57693	9.00014		8.53741	8.22145		8.50356	9.33815		7.88821	8.38641
YNL252C		9.45114	9.09212	10.2448	8.84338	9.46659	8.94255	8.6941	8.72078		8.84338	9.28579		9.45114	9.09212		8.94255	9.43574		9.69398	9.92966
YNL251C		10.9476	9.67131	10.5392	9.96055	8.20121	10.3907	11.2026	8.3438		9.96055	10.5684		10.9476	9.67131		10.3907	9.69389		9.83194	9.73656
YNL250W		6.3066	6.1141	7.44047	7.0366	6.19187	7.21106	7.13105	7.09387		7.0366	6.49663		6.3066	6.1141		7.21106	7.38676		7.20325	7.33972
YNL249C		7.74022	7.87711	7.64128	8.50716	7.7347	8.00823	7.78245	7.79353		8.50716	8.03471		7.74022	7.87711		8.00823	8.74509		7.70522	7.8087
YNL248C		11.4532	9.11985	12.4148	11.25	9.47697	11.8858	8.24532	6.06242		11.25	7.91488		11.4532	9.11985		11.8858	6.97208		10.956	10.9068
YNL247W		11.1335	9.28919	11.1795	10.2799	9.67743	11.0428	7.80916	7.49983		10.2799	8.81008		11.1335	9.28919		11.0428	8.72166		11.0708	10.9717
YNL246W		10.895	10.5933	10.6133	10.8917	9.96667	10.7546	10.001	9.86587		10.8917	10.4469		10.895	10.5933		10.7546	10.3275		10.1492	10.1481
YNL245C		10.6783	10.4359	9.64733	10.4942	9.61302	10.0577	9.76048	9.91176		10.4942	10.0761		10.6783	10.4359		10.0577	9.72705		9.86005	9.96325
YNL244C		14.0405	12.9137	14.7025	13.7276	12.9196	14.0164	12.6689	13.3907		13.7276	12.4902		14.0405	12.9137		14.0164	11.9716		12.9656	12.961
YNL243W		10.0642	9.81643	10.1576	9.76361	9.79966	10.2356	9.33742	8.92815		9.76361	10.6376		10.0642	9.81643		10.2356	11.0995		10.269	10.1924
YNL242W		6.54723	7.48044	6.05409	7.04214	6.25589	6.59333	8.55545	8.03842		7.04214	8.11976		6.54723	7.48044		6.59333	7.86341		6.80457	6.72014
YNL241C		11.4141	12.2069	11.7658	12.1228	11.5901	11.7281	13.8312	12.7219		12.1228	12.8165		11.4141	12.2069		11.7281	14.3343		11.3199	11.2937
YNL240C		9.71173	9.94654	9.98997	9.54738	9.7899	9.43134	10.6448	10.2966		9.54738	8.19246		9.71173	9.94654		9.43134	10.1111		8.63653	8.65277
YNL239W		11.1814	12.5572	10.5621	10.3226	11.3932	10.955	12.4614	11.3347		10.3226	10.3916		11.1814	12.5572		10.955	12.6923		10.5255	10.4386
YNL238W		10.3251	8.73102	9.48596	9.68983	8.974	10.1998	9.68846	9.81514		9.68983	9.74984		10.3251	8.73102		10.1998	8.94321		9.48575	9.52553
YNL237W		7.98473	10.996	5.0872	8.32601	8.25542	7.95928	9.30132	9.33241		8.32601	8.69859		7.98473	10.996		7.95928	9.76622		7.80015	7.85289
YNL236W		8.55969	7.78118	8.38718	8.59883	7.65317	8.52704	8.01201	7.85669		8.59883	8.68352		8.55969	7.78118		8.52704	8.68958		8.57698	8.38687
YNL235C		8.57462	7.86057	5.32554	8.95037	7.72265	8.64996	8.19088	8.0872		8.95037	9.02979		8.57462	7.86057		8.64996	8.70795		8.95959	8.57736
YNL234W		8.88076	7.50495	7.81511	7.6676	8.56848	8.28807	8.62944	8.54901		7.6676	6.48406		8.88076	7.50495		8.28807	8.04042		7.87463	7.5083
YNL233W		7.76692	7.60822	8.5728	7.69064	7.68058	8.46479	7.49981	7.62086		7.69064	7.81619		7.76692	7.60822		8.46479	8.42014		8.50552	8.44046
YNL232W		10.4374	9.60721	10.9894	9.7608	10.0451	10.5702	8.78652	8.86184		9.7608	9.15005		10.4374	9.60721		10.5702	9.56363		9.90735	9.9199
YNL231C		9.69346	8.98626	12.2587	10.8339	9.16544	10.4573	10.6864	10.279		10.8339	10.6978		9.69346	8.98626		10.4573	11.7408		11.3965	11.3662
YNL230C		7.69862	8.0592	8.35873	8.31697	8.04149	8.21401	8.98612	9.34385		8.31697	8.78209		7.69862	8.0592		8.21401	8.37174		8.09732	8.06755
YNL229C		9.72193	9.58224	10.9244	10.0253	10.4856	9.92273	9.09894	9.42799		10.0253	9.65261		9.72193	9.58224		9.92273	9.92241		10.2684	10.1102
YNL228W		8.21062	6.25568	5.40265	8.10349	9.17417	8.61655	6.77245	7.45482		8.10349	5.88786		8.21062	6.25568		8.61655	6.85263		9.49241	9.42052
YNL226W		4.9397	6.35252	4.73646	6.30766	7.5249	7.09931	5.5213	5.82611		6.30766	5.36923		4.9397	6.35252		7.09931	5.03505		7.49232	7.8467
YNL227C		7.78416	6.3285	9.58592	7.76659	8.86082	8.35978	6.2703	7.06108		7.76659	5.86512		7.78416	6.3285		8.35978	6.36998		9.11126	9.063
YNL225C		7.04902	7.14312	8.36543	7.58826	8.39122	7.1244	6.37697	6.28676		7.58826	7.77023		7.04902	7.14312		7.1244	6.75606		8.54503	8.54304
YNL224C		7.50801	7.38522	8.7157	7.29688	8.10479	7.86062	7.81573	8.28979		7.29688	7.65929		7.50801	7.38522		7.86062	8.02076		8.31828	8.30854
YNL223W		7.45211	8.65678	6.60882	7.39783	8.45045	6.84297	8.54763	8.74612		7.39783	8.27643		7.45211	8.65678		6.84297	8.28293		7.59327	7.48605
YNL222W		8.6738	8.27102	9.47091	8.59673	8.13821	8.92724	6.65377	6.834		8.59673	8.70649		8.6738	8.27102		8.92724	8.15859		8.91924	9.01481
YNL221C		9.27277	8.18695	9.402	9.09538	9.78259	9.60667	8.1597	8.50826		9.09538	8.36018		9.27277	8.18695		9.60667	7.95783		9.36053	9.16995
YNL220W		13.4615	10.6363	10.7728	12.4083	12.0089	12.5422	10.3059	10.8572		12.4083	11.9549		13.4615	10.6363		12.5422	11.1816		11.7691	11.5375
YNL219C		11.3912	10.7105	9.9127	10.5607	9.09985	10.8561	10.155	10.1519		10.5607	10.7531		11.3912	10.7105		10.8561	10.5567		9.70982	9.67332
YNL218W		7.92739	7.49881	8.24421	7.54084	8.38771	8.15917	8.00463	8.32553		7.54084	7.29366		7.92739	7.49881		8.15917	7.5995		7.85011	7.82659
YNL217W		10.7461	9.14412	10.9353	10.9802	10.2459	10.7118	9.67346	10.4583		10.9802	8.25878		10.7461	9.14412		10.7118	8.64166		9.97868	9.79468
YNL216W		9.5242	8.77644	9.70896	9.07786	9.20408	9.40019	8.47274	8.48296		9.07786	9.60746		9.5242	8.77644		9.40019	7.90897		9.40862	9.25961
YNL215W		8.73793	8.60413	10.4451	8.48212	9.57393	8.90755	8.96179	10.2079		8.48212	8.7333		8.73793	8.60413		8.90755	9.92516		9.88598	10.0686
YNL214W		7.6398	8.86096	8.14409	8.1838	8.15697	7.86171	8.22341	8.75976		8.1838	9.18389		7.6398	8.86096		7.86171	9.64707		7.92378	8.33404
YNL213C		8.74299	8.34043	10.1203	9.02674	9.40251	8.76281	8.61933	8.81536		9.02674	9.04401		8.74299	8.34043		8.76281	8.68747		9.30977	9.14531
YNL212W		8.72296	8.64077	9.22077	9.11983	8.86983	9.04962	9.13575	9.09465		9.11983	9.21853		8.72296	8.64077		9.04962	10.4196		9.23958	9.27846
YNL211C		8.58343	7.85783	8.90274	9.14496	9.0064	8.03875	7.7911	8.1558		9.14496	9.40803		8.58343	7.85783		8.03875	7.07311		8.46934	8.20481
YNL210W		7.82547	7.61433	3.17635	8.78466	7.44274	8.05749	5.70711	4.89644		8.78466	7.79734		7.82547	7.61433		8.05749	7.09617		7.00006	7.02128
YNL209W		15.5817	13.2939	14.8084	15.1148	12.6811	16.0281	12.2893	11.7666		15.1148	13.2123		15.5817	13.2939		16.0281	12.3726		14.3057	14.6629
YNL208W		12.3823	14.1413	12.1193	12.7862	13.1148	12.2506	14.7185	14.5456		12.7862	13.9214		12.3823	14.1413		12.2506	15.1077		12.5585	12.7372
YNL207W		10.0066	9.02447	10.6823	9.66229	9.04599	10.3976	7.82126	7.39589		9.66229	7.83759		10.0066	9.02447		10.3976	8.53691		9.84433	9.74954
YNL206C		9.28734	8.34687	9.49212	9.01362	9.60404	9.6152	7.65681	7.97953		9.01362	9.09586		9.28734	8.34687		9.6152	8.87039		9.70875	9.78361
YNL205C		6.96282	6.39597	5.35591	6.13049	6.70468	6.62578	6.28714	6.25408		6.13049	6.42925		6.96282	6.39597		6.62578	5.31937		7.15124	6.83835
YNL204C		7.75906	5.50942	5.87304	6.63487	7.33991	7.30546	7.05814	6.81026		6.63487	7.05808		7.75906	5.50942		7.30546	6.32583		7.3791	7.4943
YNL202W		7.36654	12.6538	4.21574	6.09546	8.66076	7.5474	8.52261	8.94483		6.09546	6.55791		7.36654	12.6538		7.5474	9.55873		7.46169	7.76665
YNL203C		7.494	12.5186	5.58829	5.97143	8.53734	7.48502	8.39812	8.7656		5.97143	6.53181		7.494	12.5186		7.48502	9.27623		7.37736	7.51847
YNL201C		8.30088	8.09144	8.46857	7.91778	8.27507	8.65433	8.17888	8.16544		7.91778	7.61254		8.30088	8.09144		8.65433	7.97819		9.27638	9.17283
YNL200C		9.12275	12.9038	8.42007	8.99051	11.0214	8.44285	14.7142	14.6464		8.99051	10.2502		9.12275	12.9038		8.44285	11.4172		9.24932	9.54164
YNL199C		8.66781	8.55931	9.83191	8.8358	9.15566	9.45769	9.86996	10.1841		8.8358	8.82874		8.66781	8.55931		9.45769	8.84901		9.56038	9.54254
YNL198C		7.04049	6.9885	8.38568	6.50648	7.43086	7.61405	8.97235	9.2237		6.50648	6.86795		7.04049	6.9885		7.61405	6.43492		5.93215	3.86025
YNL197C		10.2702	9.88589	9.76374	10.0802	8.6507	10.5613	9.50368	8.52897		10.0802	10.1394		10.2702	9.88589		10.5613	9.88154		9.73734	9.64163
YNL196C		7.69451	7.53391	3.11049	6.89065	6.40788	7.25571	7.58516	8.34843		6.89065	5.99815		7.69451	7.53391		7.25571	7.23911		5.82579	5.38193
YNL195C		6.58425	12.5356	7.86571	6.88129	6.91911	7.38588	12.0962	12.327		6.88129	10.5319		6.58425	12.5356		7.38588	8.72019		5.94925	6.18548
YNL194C		6.33774	12.285	3.88857	7.15801	7.25318	7.4738	11.8244	11.9958		7.15801	9.50033		6.33774	12.285		7.4738	9.13248		6.43942	5.9805
YNL193W		7.94475	8.19847	7.6503	8.59722	7.99014	8.19482	8.47562	8.34967		8.59722	9.22473		7.94475	8.19847		8.19482	8.56881		8.35239	8.57664
YNL192W		9.68476	8.89274	9.80408	12.5121	9.30417	9.62283	10.4502	10.0843		12.5121	11.75		9.68476	8.89274		9.62283	9.86764		9.58141	9.44929
YNL191W		8.46001	8.41623	9.5839	9.02665	10.1822	8.98677	9.13833	9.56166		9.02665	7.86201		8.46001	8.41623		8.98677	7.59139		9.06074	8.94754
YNL190W		14.1303	13.5041	13.3967	14.4469	12.2877	13.7637	14.655	14.9629		14.4469	13.3794		14.1303	13.5041		13.7637	12.2271		11.7311	11.6939
YNL189W		11.8455	11.0838	11.6135	11.2769	10.3478	11.7208	10.5966	9.9836		11.2769	10.8992		11.8455	11.0838		11.7208	11.3427		11.2828	11.121
YNL188W		7.10707	6.67764	9.32607	7.55842	8.64636	8.30739	6.516	6.77504		7.55842	6.99112		7.10707	6.67764		8.30739	6.84611		9.15972	9.07884
YNL187W		7.45356	7.82386	8.18157	8.30536	7.93476	7.76182	9.57431	8.79246		8.30536	7.81212		7.45356	7.82386		7.76182	8.07726		7.70645	7.76257
YNL186W		9.62284	9.22584	10.4116	9.48241	8.94992	9.70906	9.72625	9.28427		9.48241	8.22554		9.62284	9.22584		9.70906	6.64471		10.0598	9.93168
YNL185C		10.1822	10.0328	10.6925	9.827	9.3854	9.92588	9.90264	9.25512		9.827	10.4173		10.1822	10.0328		9.92588	10.4307		10.2831	10.2983
YNL184C		9.36877	9.37853	9.46244	8.43957	8.17702	8.62147	9.15493	8.24994		8.43957	9.00591		9.36877	9.37853		8.62147	9.04905		8.03163	8.17655
YNL183C		8.48761	8.96616	8.88647	8.50399	8.49399	8.2319	9.90768	8.92148		8.50399	10.0178		8.48761	8.96616		8.2319	9.21404		8.23429	8.14832
YNL182C		9.8601	7.36163	10.7572	9.68523	8.38729	10.2901	7.69022	5.31422		9.68523	6.24718		9.8601	7.36163		10.2901	6.26623		9.74986	9.44937
YNL181W		9.35287	9.07727	9.94812	9.457	8.40431	9.42217	8.60869	8.39048		9.457	8.84741		9.35287	9.07727		9.42217	9.49794		9.66612	9.68525
YNL180C		8.58092	10.3556	10.5241	8.8194	10.9135	8.81025	10.0835	10.4789		8.8194	9.438		8.58092	10.3556		8.81025	9.06498		10.342	10.5185
YNL179C		6.69813	8.77468	8.70931	6.43826	8.63279	6.0958	7.82183	7.78877		6.43826	6.56285		6.69813	8.77468		6.0958	6.61293		6.85996	6.8522
YNL178W		15.8627	13.6759	16.6558	15.2621	13.8824	16.1918	11.0618	11.4719		15.2621	13.0739		15.8627	13.6759		16.1918	14.5162		15.5227	15.546
YNL177C		9.69157	9.26532	10.4291	9.28192	9.71683	9.78245	9.2043	9.09224		9.28192	9.80463		9.69157	9.26532		9.78245	10.6173		10.0216	10.2253
YNL176C		9.80077	10.0937	9.56367	9.7597	8.95577	9.82698	11.3537	11.2327		9.7597	9.53222		9.80077	10.0937		9.82698	11.2034		9.41476	9.0613
YNL174W		10.7358	8.34145	7.06278	9.65139	9.01602	11.1246	6.68576	5.55317		9.65139	5.18752		10.7358	8.34145		11.1246	6.9902		10.7064	10.6275
YNL175C		10.655	8.30854	12.348	10.008	9.08106	11.3367	7.30985	6.39838		10.008	5.70791		10.655	8.30854		11.3367	7.5049		10.9166	10.7626
YNL173C		8.60494	10.8189	9.86074	8.48483	8.89896	8.54495	10.3055	10.4489		8.48483	9.92777		8.60494	10.8189		8.54495	11.1641		9.87485	9.75037
YNL172W		7.51836	7.33674	6.87491	7.23444	6.45185	7.74272	7.78807	7.23766		7.23444	7.46424		7.51836	7.33674		7.74272	7.72722		7.20606	6.95072
YNL170W		10.6425	8.70983	6.45107	10.0417	9.04614	9.96162	10.0054	9.86581		10.0417	10.5183		10.6425	8.70983		9.96162	9.42729		9.73579	9.62382
YNL171C		9.21859	8.29297	4.39198	8.14932	7.27255	8.61524	8.48418	8.04937		8.14932	8.63676		9.21859	8.29297		8.61524	8.41338		8.2328	8.13054
YNL169C		10.9909	9.42445	9.72913	10.2025	9.32491	10.2623	10.1683	9.74989		10.2025	10.6862		10.9909	9.42445		10.2623	9.78396		9.74322	9.76412
YNL168C		10.4753	10.5922	10.731	9.68945	9.83663	10.6022	9.97201	9.87729		9.68945	9.27568		10.4753	10.5922		10.6022	11.249		9.92993	9.8927
YNL167C		8.99095	8.54463	8.89156	9.33407	7.97706	9.17935	9.05262	8.61177		9.33407	9.34538		8.99095	8.54463		9.17935	9.35679		8.89436	8.63395
YNL166C		8.46528	8.05485	10.4093	8.58002	9.54991	8.94572	6.62894	7.03518		8.58002	8.32794		8.46528	8.05485		8.94572	8.12084		9.87518	9.92706
YNL165W		8.15235	8.77317	8.96308	7.94326	8.27423	8.51913	8.82389	8.68152		7.94326	7.9915		8.15235	8.77317		8.51913	8.45713		8.31379	8.19831
YNL164C		8.27767	7.93206	9.23836	8.62086	8.66823	8.53579	7.33981	7.53906		8.62086	7.80874		8.27767	7.93206		8.53579	7.30701		8.48848	8.62128
YNL163C		8.85366	8.08321	9.24601	8.66487	8.25639	9.31655	8.36278	7.85928		8.66487	7.30285		8.85366	8.08321		9.31655	7.66201		9.06517	9.02653
YNL162W-A		8.00887	8.19591	10.5868	9.22049	8.86413	9.774	7.12995	6.61884		9.22049	6.99626		8.00887	8.19591		9.774	5.87198		8.68593	8.5381
YNL162W		13.9675	12.2065	15.1997	13.8008	12.7513	14.3444	9.36321	9.84796		13.8008	12.1191		13.9675	12.2065		14.3444	11.6945		13.6069	13.4538
YNL161W		8.705	8.83985	9.27471	8.76316	8.85258	8.95121	8.62504	8.98373		8.76316	9.09788		8.705	8.83985		8.95121	9.13702		9.29767	9.26493
YNL160W		12.2444	15.8051	9.57543	10.9268	12.7554	9.55324	17.0549	17.8421		10.9268	12.5092		12.2444	15.8051		9.55324	13.3546		12.6373	12.7554
YNL159C		9.52817	10.138	8.48844	9.63648	9.18961	9.115	10.0017	10.1588		9.63648	10.2507		9.52817	10.138		9.115	10.4057		8.88618	8.96791
YNL158W		9.53772	9.85617	9.416	9.2732	9.50709	9.81985	9.25883	9.21644		9.2732	9.69689		9.53772	9.85617		9.81985	9.74717		9.01982	9.00078
YNL157W		10.6251	11.0506	11.1119	11.5817	11.2272	10.6843	11.158	11.7558		11.5817	11.474		10.6251	11.0506		10.6843	11.4578		10.8297	10.9441
YNL156C		10.4962	11.369	10.8706	11.2841	9.47899	9.90883	11.8713	11.6031		11.2841	12.0434		10.4962	11.369		9.90883	11.2825		10.1721	10.3745
YNL155W		8.92058	9.30296	10.6246	10.7694	9.53243	9.68984	9.80837	10.5747		10.7694	11.3607		8.92058	9.30296		9.68984	10.6712		10.6164	10.6678
YNL154C		10.9409	9.71302	11.3633	10.9771	10.2607	11.2098	9.31673	9.46593		10.9771	10.4852		10.9409	9.71302		11.2098	10.8853		10.6294	10.5716
YNL153C		11.3916	9.41683	12.6881	11.0093	11.1411	11.43	8.21168	8.84519		11.0093	10.6983		11.3916	9.41683		11.43	10.8315		11.0797	11.0773
YNL152W		8.90463	8.70568	9.0319	8.80932	8.53463	8.78701	8.24363	8.11028		8.80932	9.01821		8.90463	8.70568		8.78701	8.72053		8.80569	8.69074
YNL151C		10.6601	9.03921	11.3025	9.81544	9.47881	10.5531	7.67548	8.65582		9.81544	7.8823		10.6601	9.03921		10.5531	7.30791		10.368	10.3225
[truncated: 4,171 more rows]

## Sheet: yH2A genes
		Figure 2a									Figure S1b (lower)			Figure S1a			Figure S1b (upper)			Figure S2a
id		ypd	ypgly	t.0	untreated	glucose	pre	Typical.12hr	Flocculate.12hr		untreated	untreated		ypd	ypgly		pre	Peroxide		-cu	+Cu
YAL069W		4.17148	4.08431	4.54425	3.57597	4.44591	2.6516	7.60553	7.8845		3.57597	3.57597		4.17148	4.08431		2.6516	2.16327		2.72411	2.65222
YAL068W-A		4.47634	4.38916	4.8491	3.88083	4.54164	2.76147	7.20994	7.54223		3.88083	3.88083		4.47634	4.38916		2.76147	2.46812		3.02896	2.95707
YAL068C		5.61887	4.53169	4.41563	8.00879	8.80558	5.49765	9.09279	9.1122		8.00879	8.00879		5.61887	4.53169		5.49765	4.77572		2.51949	2.4476
YAL067W-A		5.2138	4.62663	5.01057	4.04229	6.19886	2.9736	6.69334	6.2977		4.04229	4.04229		5.2138	4.62663		2.9736	6.74177		3.19042	3.11854
YAL067C		4.90838	7.33238	6.77611	4.24582	8.9603	5.3511	7.65768	8.25968		4.24582	4.24582		4.90838	7.33238		5.3511	5.05383		4.37604	4.55208
YAL066W		4.19923	5.55654	4.572	3.60372	4.89821	1.71636	3.93283	3.5372		3.60372	3.60372		4.19923	5.55654		1.71636	1.42301		2.75185	2.67996
YAL064W		4.31588	4.3807	4.68864	3.35779	4.80514	4.46874	1.89748	3.23881		3.35779	3.35779		4.31588	4.3807		4.46874	4.52228		4.60546	2.79661
YAL063C-A		7.09879	6.4356	6.31955	4.22082	6.92584	5.46215	2.01942	4.79372		4.22082	4.22082		7.09879	6.4356		5.46215	5.69821		2.99044	5.50352
YAL018C		3.40549	3.02583	2.90977	1.94149	6.94499	2.52806	1.27061	1.87498		1.94149	1.94149		3.40549	3.02583		2.52806	2.27172		2.24163	1.01774
YAL017W		8.32149	9.35041	7.60229	8.53547	8.00305	8.24165	10.7913	10.8763		8.53547	8.53547		8.32149	9.35041		8.24165	10.0697		8.37891	8.29217
YAR069C		5.1395	4.33585	5.51227	4.20602	5.86388	3.94015	2.00462	1.60899		4.20602	4.20602		5.1395	4.33585		3.94015	1.92947		3.97565	2.75175
YAR070C		4.31788	4.2307	4.61464	4.5639	5.4523	3.37511	1.97548	1.57985		4.5639	4.5639		4.31788	4.2307		3.37511	3.61766		2.7945	2.72261
YAR071W		12.671	8.5638	12.3065	8.48235	8.78587	11.6274	7.50386	7.9458		8.48235	8.48235		12.671	8.5638		11.6274	8.20952		6.30495	7.20269
YAR073W		8.06677	5.14256	3.25229	8.06756	8.84885	8.64367	5.96112	3.15046		8.06756	8.06756		8.06677	5.14256		8.64367	8.2873		7.4713	7.33599
YAR075W		8.29601	4.93926	3.95471	7.5847	8.93127	8.73789	5.40302	2.91992		7.5847	7.5847		8.29601	4.93926		8.73789	8.67114		7.37404	7.76928
YJL225W-A		6.55704	7.32008	5.29606	4.69627	8.50674	8.98157	9.31078	9.31064		4.69627	4.69627		6.55704	7.32008		8.98157	8.93236		8.32553	7.80226
YJL225C		5.68721	6.28419	8.58821	4.65102	7.73223	8.10477	8.84757	8.88818		4.65102	4.65102		5.68721	6.28419		8.10477	7.94635		7.43197	6.96649
YJL220W		3.64733	7.27679	4.02009	2.20382	5.4339	4.63355	7.57075	7.07276		2.20382	2.20382		3.64733	7.27679		4.63355	5.07218		4.93691	3.28006
YJL221C		4.71061	7.23962	5.82034	3.47031	5.87339	5.60321	7.57967	6.97914		3.47031	3.47031		4.71061	7.23962		5.60321	6.71947		4.38579	3.77333
YJL219W		6.0024	7.06259	3.68475	6.69165	7.04133	6.13421	6.00875	4.9566		6.69165	6.69165		6.0024	7.06259		6.13421	7.29399		3.02557	2.95368
YJL218W		7.64335	7.32568	7.20489	-0.65376	8.0818	7.13957	0.84528	0.44965		-0.65376	-0.65376		7.64335	7.32568		7.13957	8.42323		7.69623	7.35585
YJL090C		7.62374	7.31332	7.85645	7.76136	7.82722	7.73911	6.92876	7.06224		7.76136	7.76136		7.62374	7.31332		7.73911	7.24374		8.03895	7.71394
YJL089W		4.48347	10.1933	3.21353	5.25622	7.68595	3.56577	7.48461	6.64048		5.25622	5.25622		4.48347	10.1933		3.56577	6.38813		2.21532	2.62885
YJL045W		5.68057	10.4586	4.09988	5.0858	7.02946	5.62422	8.51817	8.21687		5.0858	5.0858		5.68057	10.4586		5.62422	7.85613		5.03463	5.01521
YJR005C-A		4.40714	4.89597	4.77991	4.15067	7.4415	7.05188	8.73717	9.36956		4.15067	4.15067		4.40714	4.89597		7.05188	10.5414		7.03577	6.1338
YJR006W		9.0264	8.90937	9.35459	8.94778	9.05085	9.17138	8.63404	9.10514		8.94778	8.94778		9.0264	8.90937		9.17138	9.72746		9.20265	9.22435
YJR009C		16.8719	16.0792	16.2943	17.0811	15.4754	17.5885	16.3664	16.869		17.0811	17.0811		16.8719	16.0792		17.5885	18.0919		16.4117	16.0805
YJR010W		8.60799	8.11039	10.4306	8.50723	13.5994	8.57738	8.95025	8.55909		8.50723	8.50723		8.60799	8.11039		8.57738	8.53601		8.02498	8.08071
YJR077C		13.8103	15.0974	12.9242	12.5283	10.6678	12.3336	12.491	11.6418		12.5283	12.5283		13.8103	15.0974		12.3336	11.7574		11.2416	11.3416
YJR078W		6.19408	9.33648	7.29288	6.9158	9.76513	5.30903	7.85348	7.34552		6.9158	6.9158		6.19408	9.33648		5.30903	6.3132		5.34877	4.77938
YJR079W		8.9891	9.78115	4.83026	8.44139	8.98553	8.86168	9.26034	9.44071		8.44139	8.44139		8.9891	9.78115		8.86168	9.26308		9.37422	9.63491
YJR137C		8.27922	8.10838	9.77923	8.48303	11.9705	8.79796	9.34908	9.53459		8.48303	8.48303		8.27922	8.10838		8.79796	7.6529		8.04095	7.93949
YJR138W		6.75323	7.4481	7.3358	6.32923	7.08914	7.57347	7.97063	8.08529		6.32923	6.32923		6.75323	7.4481		7.57347	7.50188		7.76744	7.58517
YJR150C		2.66173	5.93125	3.1865	4.1817	14.3271	6.75434	14.8995	13.8913		4.1817	4.1817		2.66173	5.93125		6.75434	4.19006		5.53628	4.61639
YJR156C		6.02778	8.96893	6.20157	7.10755	9.39731	5.9029	8.59802	7.09548		7.10755	7.10755		6.02778	8.96893		5.9029	7.08571		4.49866	4.91219
YJR157W		5.41135	5.32417	4.33963	4.10832	7.90818	3.40998	1.70047	1.15284		4.10832	4.10832		5.41135	5.32417		3.40998	4.58073		4.25645	4.18457
YJR158W		4.68047	7.80747	2.18475	6.07907	7.16217	5.65651	5.44687	7.10738		6.07907	6.07907		4.68047	7.80747		5.65651	6.25431		4.96417	5.06916
YJR159W		6.28363	7.80648	6.91532	8.32648	7.12735	6.09571	5.89041	-0.26011		8.32648	8.32648		6.28363	7.80648		6.09571	8.64015		6.27647	5.98885
YJR160C		6.93511	7.6412	4.00216	7.80612	6.92156	6.91098	4.38332	2.57265		7.80612	7.80612		6.93511	7.6412		6.91098	6.78355		6.23698	5.98289
YJR161C		9.6777	10.4221	8.6361	11.2392	9.67078	9.33474	11.3941	11.6998		11.2392	11.2392		9.6777	10.4221		9.33474	9.95655		8.41479	8.06279
YJR162C		4.16737	4.00419	4.38813	3.57186	5.71047	2.6845	6.87825	7.4408		3.57186	3.57186		4.16737	4.00419		2.6845	2.2528		2.56799	2.4961
YKL225W		4.02775	3.94057	4.40051	2.26231	1.66322	1.54488	4.93128	5.45319		2.26231	2.26231		4.02775	3.94057		1.54488	1.63553		2.58037	2.50848
YKL224C		3.93153	3.84436	4.4563	0.014095	6.41516	2.60664	5.98707	5.91336		0.014095	0.014095		3.93153	3.84436		2.60664	4.5454		2.48416	2.41227
YKL223W		4.09131	4.08014	4.46408	8.34269	7.03772	5.44869	7.52536	7.12973		8.34269	8.34269		4.09131	4.08014		5.44869	5.401		2.64394	2.72405
YKL222C		7.68862	7.85014	7.56558	8.08199	7.52209	7.93938	7.97918	8.11773		8.08199	8.08199		7.68862	7.85014		7.93938	7.48149		7.30674	7.30287
YKL221W		5.23395	8.12242	2.52176	4.81651	5.89408	5.20736	6.47206	5.81069		4.81651	4.81651		5.23395	8.12242		5.20736	5.13033		5.09393	4.21469
YKL179C		8.1767	8.13205	9.54164	9.01525	8.82184	8.91752	7.25979	8.02863		9.01525	9.01525		8.1767	8.13205		8.91752	9.09918		9.63835	9.53114
YKL177W		4.64155	6.71534	4.51432	7.39815	9.82661	4.98631	5.25859	4.98849		7.39815	7.39815		4.64155	6.71534		4.98631	5.48443		2.77018	2.54629
YKL178C		4.74311	7.8781	2.45491	8.20216	9.76959	6.37554	4.86904	4.70167		8.20216	8.20216		4.74311	7.8781		6.37554	6.68319		4.1702	3.44624
YKR009C		7.19067	11.7511	6.335	7.7776	7.53334	7.3941	8.99501	8.50767		7.7776	7.7776		7.19067	11.7511		7.3941	8.76245		6.65762	6.9319
YKR031C		7.34685	7.17305	8.08532	6.98852	7.22654	7.65953	9.05077	9.09287		6.98852	6.98852		7.34685	7.17305		7.65953	7.79701		8.12771	7.99555
YKR034W		2.80891	5.5347	5.78713	1.62844	8.30065	2.97533	11.1609	9.1497		1.62844	1.62844		2.80891	5.5347		2.97533	2.56113		2.51354	1.44165
YKR033C		3.73598	6.38577	4.68475	2.29248	8.30436	2.99008	11.1526	9.06264		2.29248	2.29248		3.73598	6.38577		2.99008	2.11177		3.44061	2.21672
YKR035W-A		9.42418	9.43849	11.9639	9.50286	10.4931	9.63567	9.5135	10.5749		9.50286	9.50286		9.42418	9.43849		9.63567	10.3764		10.5329	10.5805
YKR105C		6.01808	7.55286	3.22315	6.63685	8.2431	6.72216	5.8243	5.99055		6.63685	6.63685		6.01808	7.55286		6.72216	6.52086		6.07543	6.35348
YKR106W		5.46711	7.28758	4.93619	4.2629	7.64935	5.65962	4.52247	4.44877		4.2629	4.2629		5.46711	7.28758		5.65962	7.14752		5.45285	5.92411
YLL067W-A		4.4993	4.04364	5.00358	4.1817	8.91311	8.84291	9.60583	9.97494		4.1817	4.1817		4.4993	4.04364		8.84291	8.62518		7.9033	5.99491
YLL067C		5.18865	4.99752	8.84683	3.87876	8.38519	8.4139	9.32094	9.42397		3.87876	3.87876		5.18865	4.99752		8.4139	8.05735		7.85843	5.6529
YLL066W-B		5.20484	4.96566	5.50161	4.74684	4.18361	3.91696	7.37141	6.97578		4.74684	4.74684		5.20484	4.96566		3.91696	3.53593		3.60546	3.53357
YLL066W-A		4.20682	5.61964	5.00358	4.1113	8.87932	8.90066	9.53159	9.84116		4.1113	4.1113		4.20682	5.61964		8.90066	8.67069		7.95988	5.50948
YLL066C		4.19796	4.714	8.83508	3.84533	8.46779	8.46632	9.24976	9.43859		3.84533	3.84533		4.19796	4.714		8.46632	8.07636		8.25791	5.84342
YLL065W		4.01537	3.92819	4.38813	1.24993	3.58947	2.69047	5.55633	5.26023		1.24993	1.24993		4.01537	3.92819		2.69047	2.05782		2.71999	2.4961
YLL064C		7.20383	6.22785	4.33963	1.78639	9.41916	7.84584	8.76656	8.61772		1.78639	1.78639		7.20383	6.22785		7.84584	6.82047		7.37193	6.18457
YLL048C		10.543	9.52331	9.65232	9.98586	8.46962	10.8758	10.2655	10.0015		9.98586	9.98586		10.543	9.52331		10.8758	9.60671		9.61872	9.50276
YLL046C		2.99595	4.98477	4.73719	0.15451	6.10266	3.12731	3.97548	4.57985		0.15451	0.15451		2.99595	4.98477		3.12731	3.51035		1.47257	3.13765
YLL044W		15.7404	13.1296	8.13204	15.1948	13.7773	15.7898	10.5346	10.5989		15.1948	15.1948		15.7404	13.1296		15.7898	13.0335		14.9349	14.9876
YLL031C		9.94781	9.49261	8.71395	9.59102	8.02367	9.96965	8.68174	8.50014		9.59102	9.59102		9.94781	9.49261		9.96965	9.00818		9.12631	9.00874
YLL030C		4.05284	4.04166	4.42561	1.2874	2.35497	1.62064	3.78645	1.23881		1.2874	1.2874		4.05284	4.04166		1.62064	1.76196		2.60546	2.53357
YLL029W		8.90388	10.125	9.84714	9.2433	10.2727	9.01024	10.9447	11.2525		9.2433	9.2433		8.90388	10.125		9.01024	10.4155		10.024	9.87461
YLL005C		8.20845	8.73722	2.57128	7.90783	7.33796	8.16663	8.87293	8.71788		7.90783	7.90783		8.20845	8.73722		8.16663	7.62305		7.471	7.50345
YLL004W		7.43602	6.99611	8.28451	7.76256	8.13984	7.92303	5.617	5.22136		7.76256	7.76256		7.43602	6.99611		7.92303	7.34462		8.32123	8.05024
YLR027C		12.8763	12.7992	12.3246	12.0495	11.8548	12.7522	11.7552	11.0058		12.0495	12.0495		12.8763	12.7992		12.7522	13.5557		12.0017	11.9175
YLR054C		2.47931	6.52083	3.80552	7.3284	6.67057	4.73621	6.07214	5.75275		7.3284	7.3284		2.47931	6.52083		4.73621	5.67296		3.49137	4.54501
YLR154W-C		3.91995	3.83277	7.56487	14.811	11.3511	15.0808	16.2138	15.9543		14.811	14.811		3.91995	3.83277		15.0808	14.1122		11.2245	12.0957
YLR154W-E		4.79827	4.71109	6.03951	12.2028	10.5799	13.0413	15.0874	15.6058		12.2028	12.2028		4.79827	4.71109		13.0413	12.1666		8.40978	9.56029
YLR154W-F		5.33114	5.24396	6.94087	13.2483	10.1839	12.4407	14.7473	14.2385		13.2483	13.2483		5.33114	5.24396		12.4407	11.4086		10.1443	10.8219
YLR154C-H		7.37078	7.8948	5.87507	6.05318	10.6562	8.13852	8.96726	10.0862		6.05318	6.05318		7.37078	7.8948		8.13852	8.79832		8.37885	8.30696
YLR157W-E		5.75637	6.96168	7.03282	5.50886	7.66511	5.16348	7.0859	5.76427		5.50886	5.50886		5.75637	6.96168		5.16348	7.55942		3.65699	4.73711
YLR157C-C		6.79478	6.99112	5.79906	5.90879	9.76886	7.58425	8.32983	9.88321		5.90879	5.90879		6.79478	6.99112		7.58425	8.44922		4.13093	6.05903
YLR159C-A		6.0783	6.78361	5.79906	6.56775	9.81331	7.8653	8.28919	9.92414		6.56775	6.56775		6.0783	6.78361		7.8653	8.68342		5.71589	4.05903
YLR162W		3.99091	4.47974	4.36368	4.74904	4.45462	8.09739	8.50588	8.60501		4.74904	4.74904		3.99091	4.47974		8.09739	7.74526		7.2805	8.08308
YLR162W-A		4.90845	4.89727	5.28122	11.4995	7.75087	7.91199	12.3494	12.0261		11.4995	11.4995		4.90845	4.89727		7.91199	7.54714		7.61308	8.58558
YLR272C		7.35432	6.65735	7.97894	7.65664	6.55116	8.46519	6.93414	7.11292		7.65664	7.65664		7.35432	6.65735		8.46519	6.96202		8.24121	8.15362
YLR307C-A		5.0023	13.1203	4.87507	0.660862	9.08598	3.69788	3.74487	2.76427		0.660862	0.660862		5.0023	13.1203		3.69788	4.4417		3.13092	3.05904
YLR308W		2.59571	3.66054	2.96848	0.415238	5.47319	1.65482	3.13667	2.51865		0.415238	0.415238		2.59571	3.66054		1.65482	2.01459		3.30034	2.81341
YLR327C		6.88727	15.6524	9.16371	11.2491	11.5245	6.80752	15.7624	16.2134		11.2491	11.2491		6.88727	15.6524		6.80752	11.7722		9.07815	9.58332
YLR328W		10.2962	9.47262	10.3011	9.97257	9.05014	10.4339	9.1457	8.29717		9.97257	9.97257		10.2962	9.47262		10.4339	9.81224		9.9589	9.73778
YLR444C		10.0029	8.53827	5.17629	9.07679	8.86574	9.88532	8.17058	7.92304		9.07679	9.07679		10.0029	8.53827		9.88532	9.41741		8.51711	9.28652
YLR445W		5.1843	4.11744	3.50138	5.38555	5.05408	4.60264	5.32165	5.05155		5.38555	5.38555		5.1843	4.11744		4.60264	2.47336		3.83324	4.08328
YLR446W		9.07218	7.22741	6.70321	8.84558	6.97276	8.82623	9.02018	8.23694		8.84558	8.84558		9.07218	7.22741		8.82623	7.48415		7.99873	7.91679
YLR460C		6.42672	4.21981	6.72952	4.6704	8.2123	6.63401	9.39854	8.98043		4.6704	4.6704		6.42672	4.21981		6.63401	12.4666		7.29872	7.70151
YLR461W		3.96687	3.87969	4.33963	3.66086	8.6294	5.4024	8.12674	7.85943		3.66086	3.66086		3.96687	3.87969		5.4024	6.44009		6.13093	5.40696
YLR462W		3.22039	3.70922	6.90613	3.26231	7.08296	7.39311	7.66824	7.6564		3.26231	3.26231		3.22039	3.70922		7.39311	6.91101		7.28257	6.71111
YLR464W		5.99132	6.64862	8.19059	6.96829	7.35536	7.80931	8.00142	7.90178		6.96829	6.96829		5.99132	6.64862		7.80931	7.38696		8.25675	8.08783
YLR463C		3.43817	3.35099	5.5479	3.68419	6.99813	7.2323	7.45333	7.67742		3.68419	3.68419		3.43817	3.35099		7.2323	6.88215		8.25662	7.45434
YLR466W		4.60133	5.04461	8.97844	5.21419	8.41004	8.5241	9.16874	9.28097		5.21419	5.21419		4.60133	5.04461		8.5241	8.28056		6.83625	6.44243
YLR465C		7.30468	8.00998	7.17744	8.20858	7.65407	8.43816	8.39227	8.2237		8.20858	8.20858		7.30468	8.00998		8.43816	7.90747		8.26141	8.2914
YLR466C-A		4.20682	3.54364	4.79606	4.24881	8.95368	8.95845	9.52682	9.83823		4.24881	4.24881		4.20682	3.54364		8.95845	8.89183		8.01433	7.09444
YLR466C-B		6.25233	6.95763	6.0491	7.85726	7.12991	7.45854	7.03437	7.18623		7.85726	7.85726		6.25233	6.95763		7.45854	7.53137		6.30495	6.23306
YLR467W		4.96625	4.87806	8.71383	5.34509	8.25407	8.44397	8.88878	8.9987		5.34509	5.34509		4.96625	4.87806		8.44397	8.16045		7.52045	6.60191
YLR467C-A		3.63082	3.54364	5.29606	4.37434	8.85353	9.0873	9.55988	9.74766		4.37434	4.37434		3.63082	3.54364		9.0873	8.77747		7.61699	7.57987
YML133W-B		4.13082	3.46764	4.50358	2.9593	8.75736	8.88401	9.65036	9.79968		2.9593	2.9593		4.13082	3.46764		8.88401	8.53248		4.58137	4.18755
YML133W-A		3.87677	3.21359	5.15321	3.62279	8.8792	8.85536	9.99147	10.1406		3.62279	3.62279		3.87677	3.21359		8.85536	8.58527		6.91228	7.10343
YML133C		3.73927	4.01332	8.81696	4.00959	8.38023	8.38646	9.25002	9.42159		4.00959	4.00959		3.73927	4.01332		8.38646	8.01633		5.23945	5.81392
YML132W		10.3783	11.0062	8.43184	8.87687	10.2652	10.1091	11.7964	12.2814		8.87687	8.87687		10.3783	11.0062		10.1091	10.6987		9.29196	9.39156
YML047C		3.57421	2.33503	2.87097	2.9047	5.87069	2.53198	2.15581	3.08211		2.9047	2.9047		3.57421	2.33503		2.53198	1.01644		6.03372	7.24477
YML046W		8.65438	7.67098	8.82965	8.91912	8.33702	8.9176	7.29741	7.70913		8.91912	8.91912		8.65438	7.67098		8.9176	8.23739		8.92414	8.96745
YML043C		7.602	6.98202	9.19767	6.29652	8.6228	8.34288	5.56139	4.18922		6.29652	6.29652		7.602	6.98202		8.34288	4.4467		9.08145	8.95605
YML042W		6.67521	12.0419	5.68579	7.36494	8.11851	7.04282	12.4711	12.1372		7.36494	7.36494		6.67521	12.0419		7.04282	8.54466		6.00754	6.37622
YMR081C		7.12123	10.7414	4.79784	9.23969	8.28561	6.94672	12.4892	11.9904		9.23969	9.23969		7.12123	10.7414		6.94672	8.87661		6.43314	6.89468
YMR082C		4.06691	4.05574	4.36368	1.22548	4.06613	1.94271	4.89444	3.91385		1.22548	1.22548		4.06691	4.05574		1.94271	2.3667		2.54353	2.47165
YMR101C		5.40395	6.08893	2.83223	2.27899	5.02318	4.48542	6.21544	6.35203		2.27899	2.27899		5.40395	6.08893		4.48542	5.09025		3.74905	3.89956
YMR118C		8.5479	11.973	3.71245	8.96585	8.80329	8.67985	11.2464	11.7952		8.96585	8.96585		8.5479	11.973		8.67985	9.05284		7.9683	7.67777
YMR119W		10.0514	10.394	8.52465	10.2063	8.91705	9.93891	9.91188	10.2663		10.2063	10.2063		10.0514	10.394		9.93891	10.4637		9.12919	9.17327
YMR251W		6.13251	9.55725	5.05183	6.43355	8.023	5.37042	8.77918	9.08777		6.43355	6.43355		6.13251	9.55725		5.37042	8.79575		5.82561	4.90572
YMR280C		6.98583	8.38123	3.98931	4.99641	6.30892	6.2134	8.82699	7.90529		4.99641	4.99641		6.98583	8.38123		6.2134	6.64754		5.83245	5.63255
YMR281W		9.61462	8.63864	8.42059	9.09885	8.54275	8.83744	9.63813	9.78		9.09885	9.09885		9.61462	8.63864		8.83744	9.07696		8.61382	8.78936
YMR321C		9.59379	7.01512	9.88939	9.32015	10.1407	10.8016	6.69877	6.40268		9.32015	9.32015		9.59379	7.01512		10.8016	10.2785		10.0122	10.2168
YMR322C		3.06691	8.49706	3.51568	1.81044	7.65217	2.59583	9.88691	10.0189		1.81044	1.81044		3.06691	8.49706		2.59583	3.96157		1.54354	1.47165
YMR323W		2.11094	6.82537	2.48371	1.80494	6.69563	2.08237	10.6422	10.5351		1.80494	1.80494		2.11094	6.82537		2.08237	3.87795		1.81557	2.32864
YMR324C		4.54588	5.32719	4.91864	0.628441	7.13977	2.54835	7.18637	6.40742		0.628441	0.628441		4.54588	5.32719		2.54835	2.44998		3.0985	3.02661
YMR325W		3.91995	3.83277	4.29271	1.73947	7.85444	2.97905	6.74101	6.01281		1.73947	1.73947		3.91995	3.83277		2.97905	5.38855		4.20953	2.55268
YMR326C		4.19923	4.11205	4.572	2.01876	2.15448	1.76703	1.78083	4.34456		2.01876	2.01876		4.19923	4.11205		1.76703	1.42301		2.75185	2.67996
YNL339W-B		3.55481	3.46764	4.07958	3.24881	8.81545	8.87578	9.84684	9.79063		3.24881	3.24881		3.55481	3.46764		8.87578	8.57684		6.25944	7.99491
YNL339W-A		3.30077	3.21359	4.54202	3.99476	8.88738	8.9084	9.94426	10.1465		3.99476	3.99476		3.30077	3.21359		8.9084	8.62959		8.67782	10.4919
YNL339C		4.77227	4.82708	8.4646	5.0288	8.10887	8.25272	8.9529	9.0421		5.0288	5.0288		4.77227	4.82708		8.25272	7.87692		7.32813	9.06048
YNL338W		5.15781	5.72264	5.53057	3.97734	4.42891	4.60092	7.21334	6.74371		3.97734	3.97734		5.15781	5.72264		4.60092	5.69754		3.71043	3.79055
YNL337W		4.62834	4.46516	4.8491	1.7109	5.20154	1.99347	6.96483	7.62167		1.7109	1.7109		4.62834	4.46516		1.99347	2.38044		3.02896	3.10908
YNL336W		9.89145	10.7	8.95361	10.8543	10.3768	9.81128	11.772	12.1281		10.8543	10.8543		9.89145	10.7		9.81128	10.2073		9.65317	10.4879
YNL335W		6.85095	8.39118	5.59032	-0.85189	7.38474	6.94801	9.36901	8.08301		-0.85189	-0.85189		6.85095	8.39118		6.94801	7.30249		7.01811	6.90774
YNL334C		6.64051	8.87397	7.79276	-0.83261	8.67768	7.34705	9.28196	9.80435		-0.83261	-0.83261		6.64051	8.87397		7.34705	8.17143		7.64744	8.07512
YNL333W		7.14462	9.97498	7.63994	-1.25571	8.98689	7.69244	9.47482	9.33955		-1.25571	-1.25571		7.14462	9.97498		7.69244	9.74388		7.53628	8.13996
YNL332W		5.51479	8.6323	5.95032	6.09898	8.49375	5.62665	7.82042	5.98		6.09898	6.09898		5.51479	8.6323		5.62665	6.16272		3.76169	5.01173
YNL328C		7.08399	8.17363	7.95675	6.99744	7.69271	7.39781	7.74159	7.72447		6.99744	6.99744		7.08399	8.17363		7.39781	7.05974		7.783	7.64072
YNL327W		11.6833	10.3108	10.9589	9.8722	10.4119	12.0271	10.8908	10.7646		9.8722	9.8722		11.6833	10.3108		12.0271	9.50108		11.2113	10.8343
YNL318C		4.25073	3.82452	2.25501	2.62577	5.97779	1.99612	1.53985	1.72918		2.62577	2.62577		4.25073	3.82452		1.99612	2.30414		3.09583	2.02394
YNL317W		7.94167	8.32398	8.66102	8.17049	8.09678	8.11952	7.95482	8.24216		8.17049	8.17049		7.94167	8.32398		8.11952	8.3921		8.50753	8.33376
YNL316C		8.9878	8.54903	9.04263	8.9802	8.68675	8.78849	7.10168	6.47954		8.9802	8.9802		8.9878	8.54903		8.78849	8.32979		8.38225	8.68504
YNL314W		8.21651	8.34451	8.56694	8.18369	9.09312	8.1528	8.99437	9.31382		8.18369	8.18369		8.21651	8.34451		8.1528	8.87803		8.26278	8.02626
YNL271C		8.19031	7.02614	8.46471	8.2184	7.288	8.42877	9.17194	8.90896		8.2184	8.2184		8.19031	7.02614		8.42877	7.45833		8.72826	8.60167
YNL269W		5.28582	6.4708	4.2901	3.39783	6.07019	4.39773	7.45758	8.20168		3.39783	3.39783		5.28582	6.4708		4.39773	5.03556		4.54596	5.05903
YNR071C		5.97279	7.29027	2.83643	-1.45377	7.60175	6.10764	11.0062	10.094		-1.45377	-1.45377		5.97279	7.29027		6.10764	7.03602		5.49022	5.41833
YNR075C-A		9.8872	8.4498	6.3043	9.94746	9.44731	9.08948	8.47249	8.43943		9.94746	9.94746		9.8872	8.4498		9.08948	8.09657		8.22112	8.0237
YNR076W		7.87277	6.35362	4.33963	2.78639	9.2838	7.7418	8.8903	8.59946		2.78639	2.78639		7.87277	6.35362		7.7418	6.89154		4.25645	6.30004
YNR077C		4.55234	4.46516	4.8491	0.710903	4.65004	2.37747	6.37987	6.06224		0.710903	0.710903		4.55234	4.46516		2.37747	2.27911		3.02896	2.95707
YOL166W-A		5.18529	5.09811	5.55806	1.26785	0.851793	2.70242	5.50386	3.52326		1.26785	1.26785		5.18529	5.09811		2.70242	2.40907		3.73791	3.66602
YOL166C		4.06555	3.97837	4.43832	3.10747	3.56267	2.68402	4.12108	1.25152		3.10747	3.10747		4.06555	3.97837		2.68402	3.21531		2.61817	2.54629
YOL165C		7.03773	6.4416	6.19402	6.67829	7.81475	7.49728	6.53687	5.57734		6.67829	6.67829		7.03773	6.4416		7.49728	11.7688		6.12087	6.59647
YOL164W-A		5.03099	6.9235	5.32776	7.18956	8.63062	6.42156	2.53659	2.14096		7.18956	7.18956		5.03099	6.9235		6.42156	7.61742		5.98155	6.75765
YOL164W		8.36424	8.61789	7.9968	9.25333	9.2521	8.41164	-0.71829	-1.26592		9.25333	9.25333		8.36424	8.61789		8.41164	8.77363		7.70395	7.6727
YOL163W		4.71331	7.78709	7.31578	8.29962	8.62406	6.49	1.05794	0.66231		8.29962	8.29962		4.71331	7.78709		6.49	7.87579		5.18096	4.431
YOL162W		4.28285	7.13085	6.17781	7.52528	7.8323	5.8779	0.712444	0.316814		7.52528	7.52528		4.28285	7.13085		5.8779	7.10341		4.1574	4.57094
YOL161C		3.96687	3.87969	4.33963	3.37136	8.66993	5.3479	8.40091	7.99134		3.37136	3.37136		3.96687	3.87969		5.3479	4.97828		2.67149	2.4476
YOL160W		4.05284	4.61767	4.57761	5.64496	7.84996	5.49595	1.63444	1.23881		5.64496	5.64496		4.05284	4.61767		5.49595	5.16673		3.75747	4.68558
YOL159C		9.43699	10.0912	8.84819	9.24285	9.61019	9.05903	8.23746	8.75744		9.24285	9.24285		9.43699	10.0912		9.05903	9.76256		8.63983	8.61576
YOL157C		4.8978	7.41813	6.19457	5.69051	6.1292	6.12836	7.87009	7.39417		5.69051	5.69051		4.8978	7.41813		6.12836	7.34533		6.38579	6.65375
YOL156W		5.7242	7.20045	4.45691	8.51648	7.23195	6.58102	6.11344	4.93194		8.51648	8.51648		5.7242	7.20045		6.58102	7.71521		5.93246	5.72627
YOL155W-A		6.87356	5.9587	5.76664	9.61143	7.87839	6.56428	5.71244	5.31681		9.61143	9.61143		6.87356	5.9587		6.56428	6.34677		8.00539	8.93351
YOL134C		9.76902	9.73185	6.04185	9.70895	10.3445	9.53577	9.86375	10.0809		9.70895	9.70895		9.76902	9.73185		9.53577	10.8054		9.12258	9.12546
YOL132W		5.74005	6.97159	2.45185	4.50444	8.05706	5.63173	7.1879	6.57947		4.50444	4.50444		5.74005	6.97159		5.63173	6.11601		4.29268	4.63582
YOL131W		4.19355	7.17101	4.49031	3.52203	7.93736	3.75564	7.343	7.7593		3.52203	3.52203		4.19355	7.17101		3.75564	5.90314		2.82217	3.75028
YOL124C		9.79584	8.21563	11.1114	9.1261	8.96036	10.4341	7.516	4.41635		9.1261	9.1261		9.79584	8.21563		10.4341	5.47638		10.0137	9.65778
YOL123W		11.123	8.9148	11.8438	10.3715	9.15601	10.9609	9.47182	7.80417		10.3715	10.3715		11.123	8.9148		10.9609	9.92085		11.21	11.2713
YOL085C		5.20484	6.86359	4.42561	6.41669	6.3231	6.14638	8.22939	8.02017		6.41669	6.41669		5.20484	6.86359		6.14638	7.42724		5.75747	6.00751
YOL084W		4.37602	11.3568	3.74878	6.60904	6.13104	4.3624	9.75922	7.53863		6.60904	6.60904		4.37602	11.3568		4.3624	6.82943		3.63616	4.51847
YOR007C		12.2013	12.581	13.0069	12.8548	11.6169	12.858	12.9502	13.0154		12.8548	12.8548		12.2013	12.581		12.858	13.7335		12.5097	12.5153
YOR019W		7.0462	8.21436	6.1427	6.77147	7.96836	6.72485	8.3794	7.68152		6.77147	6.77147		7.0462	8.21436		6.72485	8.34673		6.12102	6.69124
YOR100C		3.18018	12.0291	4.05295	6.1806	8.52808	4.01438	10.4279	10.0793		6.1806	6.1806		3.18018	12.0291		4.01438	5.81229		3.2328	3.48284
YOR101W		11.1406	9.05062	11.667	9.94023	9.26451	10.9895	8.48276	6.66183		9.94023	9.94023		11.1406	9.05062		10.9895	8.19281		10.5213	10.2785
YOR213C		9.55665	8.88573	9.46858	9.68679	9.44929	9.72555	8.56622	8.79898		9.68679	9.68679		9.55665	8.88573		9.72555	8.99667		8.82018	8.51266
YOR214C		4.14899	3.48581	3.44575	2.81651	7.17139	2.33279	5.19002	4.65689		2.81651	2.81651		4.14899	3.48581		2.33279	1.18376		1.54961	3.21469
YOR238W		8.0297	8.35737	8.84573	8.32769	9.28669	8.57512	7.52115	7.99259		8.32769	8.32769		8.0297	8.35737		8.57512	8.14065		8.66436	8.94296
YOR254C		10.8741	9.05926	10.8622	11.0715	9.63533	11.322	8.21871	7.63002		11.0715	11.0715		10.8741	9.05926		11.322	10.0894		10.8974	10.9017
YOR255W		3.33761	3.25043	3.21037	1.99617	6.39325	1.10338	3.08018	4.18705		1.99617	1.99617		3.33761	3.25043		1.10338	1.66571		1.31423	1.24234
YOR320C		9.6198	9.07706	9.67275	9.45855	9.34241	10.3117	9.0777	9.7179		9.45855	9.45855		9.6198	9.07706		10.3117	9.52809		10.0762	10.0064
YOR321W		9.69825	9.41166	8.17084	9.5922	8.59128	9.66223	9.80491	10.004		9.5922	9.5922		9.69825	9.41166		9.66223	9.82317		8.8133	8.8118
YOR327C		10.8647	11.6219	12.1419	11.1752	12.071	11.0892	10.7782	11.4019		11.1752	11.1752		10.8647	11.6219		11.0892	11.3221		11.5997	11.6548
YOR328W		7.43349	9.67595	6.63829	7.99518	6.59534	7.84096	9.53633	7.94826		7.99518	7.99518		7.43349	9.67595		7.84096	8.16895		6.7333	6.68131
YOR347C		8.42599	10.0509	7.9448	7.38948	8.59945	7.01386	9.98001	9.13571		7.38948	7.38948		8.42599	10.0509		7.01386	10.0322		7.98822	8.20505
YOR387C		6.63673	6.51097	3.56501	6.54575	15.3469	6.25579	8.80849	8.09246		6.54575	6.54575		6.63673	6.51097		6.25579	7.28367		6.65176	6.86937
YOR388C		6.36999	14.1959	2.85208	5.63869	7.61619	6.87547	10.6921	10.3974		5.63869	5.63869		6.36999	14.1959		6.87547	5.94274		5.73238	5.91424
YOR389W		6.79375	8.45061	7.38799	6.87971	8.20819	6.9964	10.7142	10.8829		6.87971	6.87971		6.79375	8.45061		6.9964	7.38363		7.05753	6.64015
YOR391C		3.06691	9.36836	3.51568	0.810439	7.7307	2.05002	10.6314	10.6886		0.810439	0.810439		3.06691	9.36836		2.05002	4.65178		1.69554	4.431
YOR392W		5.32828	8.40656	4.04904	-0.24116	7.04649	3.64771	7.67667	6.99153		-0.24116	-0.24116		5.32828	8.40656		3.64771	3.54935		2.3809	2.30901
YOR393W		3.59062	7.88943	3.05971	0.667435	6.9734	2.85152	11.1049	11.1013		0.667435	0.667435		3.59062	7.88943		2.85152	4.79291		0.815569	4.9136
YOR394W		4.17141	4.58423	3.89217	6.44047	8.4066	5.00078	8.41288	7.70287		6.44047	6.44047		4.17141	4.58423		5.00078	5.4651		2.07203	3.73711
YOR394C-A		6.52286	6.1432	6.02714	5.12029	6.04214	6.18627	7.05991	6.87578		5.12029	5.12029		6.52286	6.1432		6.18627	5.47976		3.783	5.71111
YOR396W		3.45607	2.93166	8.691	3.82462	8.28285	8.44009	8.92365	8.98692		3.82462	3.82462		3.45607	2.93166		8.44009	8.15576		3.1713	6.30701
YOR396C-A		3.55481	3.46764	5.00358	3.59673	8.89472	9.0155	9.58763	9.72884		3.59673	3.59673		3.55481	3.46764		9.0155	8.8491		3.8444	7.14175
YPL283W-B		3.55481	3.46764	4.79606	3.78938	8.81405	8.94929	9.6013	9.75077		3.78938	3.78938		3.55481	3.46764		8.94929	8.75339		6.8444	7.09444
YPL283W-A		3.30077	3.21359	4.54202	3.53533	8.92256	8.84294	9.88924	10.0755		3.53533	3.53533		3.30077	3.21359		8.84294	8.55737		8.23421	7.14296
YPL283C		4.29985	4.52589	8.57959	4.81763	8.13225	8.23797	8.9523	9.04766		4.81763	4.81763		4.29985	4.52589		8.23797	7.89292		7.16724	5.83878
YPL282C		3.67141	3.50823	3.89217	6.4264	8.28366	4.3033	8.20721	7.82317		6.4264	6.4264		3.67141	3.50823		4.3033	5.31196		2.22403	2.00014
YPL281C		2.18695	8.13371	2.55971	-0.06953	6.92991	2.08237	11.1224	11.0432		-0.06953	-0.06953		2.18695	8.13371		2.08237	4.64081		3.81557	0.74368
YPL280W		3.06691	8.90117	3.36368	-0.77452	7.59987	1.85503	10.1318	10.3275		-0.77452	-0.77452		3.06691	8.90117		1.85503	4.45494		3.69554	2.62365
YPL201C		5.5362	10.677	3.85123	3.478	3.84322	4.59927	7.63795	7.55683		3.478	3.478		5.5362	10.677		4.59927	3.94148		4.82607	3.98865
YPL200W		5.07079	9.93944	3.96387	3.52611	3.66319	4.91934	4.32471	2.51405		3.52611	3.52611		5.07079	9.93944		4.91934	3.94183		5.29574	4.54577
YPL187W		3.51069	5.368	4.53546	1.74526	14.7234	1.79582	5.05165	5.09659		1.74526	1.74526		3.51069	5.368		1.79582	2.74813		2.06331	1.99142
YPL185W		7.42852	10.8003	5.15859	5.71976	7.86638	6.02618	10.8534	11.9442		5.71976	5.71976		7.42852	10.8003		6.02618	7.21946		4.13093	6.38096
YPL172C		9.17115	8.53624	8.9815	7.67269	8.54168	8.38128	9.22799	8.49296		7.67269	7.67269		9.17115	8.53624		8.38128	7.98609		8.4702	8.60024
YPL171C		4.18276	7.89924	6.61326	5.48406	5.88903	5.37305	12.6216	12.3916		5.48406	5.48406		4.18276	7.89924		5.37305	12.3426		4.52786	5.33044
YPL170W		9.79499	11.0793	11.2218	10.8629	10.7037	9.54981	11.4925	11.5103		10.8629	10.8629		9.79499	11.0793		9.54981	9.97742		10.2399	10.3852
YPL130W		4.23038	3.85968	3.45114	2.8979	6.8248	2.57812	4.39694	5.54563		2.8979	2.8979		4.23038	3.85968		2.57812	1.46013		2.783	2.71111
YPL129W		10.5336	9.70309	11.5814	10.6692	10.7271	10.8375	8.16248	8.64132		10.6692	10.6692		10.5336	9.70309		10.8375	10.9499		10.8274	10.9571
YPL035C		8.72349	7.9497	5.55252	10.2944	9.56948	8.9935	6.84882	8.07997		10.2944	10.2944		8.72349	7.9497		8.9935	9.47981		8.28696	8.83041
YPL033C		3.32218	4.60349	3.19495	2.7881	8.89134	3.28688	2.47978	4.33208		2.7881	2.7881		3.32218	4.60349		3.28688	3.94041		1.4508	4.37892
YPL021W		3.33114	3.24396	3.77991	2.15067	7.17751	1.81126	7.35015	7.982		2.15067	2.15067		3.33114	3.24396		1.81126	1.90191		1.88376	1.81187
YPR006C		7.07674	11.6083	7.89758	7.39745	7.37988	7.38476	8.4381	8.02819		7.39745	7.39745		7.07674	11.6083		7.38476	8.16199		7.4428	7.41463
YPR007C		3.4187	6.80862	2.42299	3.4367	6.82897	3.48714	6.37775	7.33967		3.4367	3.4367		3.4187	6.80862		3.48714	5.28637		2.50077	3.10696
YPR008W		9.04366	9.65814	8.83492	9.09675	9.67848	8.7404	9.71859	9.73266		9.09675	9.09675		9.04366	9.65814		8.7404	9.301		9.34424	9.23999
YPR075C		10.357	11.2669	10.4558	10.763	10.7151	10.3206	11.2688	11.6021		10.763	10.763		10.357	11.2669		10.3206	11.3165		10.2493	10.4718
YPR077C		4.50754	6.69252	4.9563	5.86654	7.15261	4.29294	6.83506	5.72894		5.86654	5.86654		4.50754	6.69252		4.29294	6.3684		3.63616	4.14923
YPR078C		5.24063	8.31361	3.86747	7.28462	8.01659	5.8613	7.23617	6.50085		7.28462	7.28462		5.24063	8.31361		5.8613	8.41952		3.85468	4.97544
YPR079W		8.6231	9.20707	8.21051	8.45725	9.58725	8.32701	9.21433	9.38437		8.45725	8.45725		8.6231	9.20707		8.32701	10.5533		8.65678	8.64148
YPR202W		6.15862	6.94889	7.63286	6.57075	7.8146	7.92125	7.95554	8.15014		6.57075	6.57075		6.15862	6.94889		7.92125	7.48115		6.58869	6.90146
YPR203W		5.64372	5.18805	7.78864	5.13423	7.97413	7.90029	8.32515	8.5816		5.13423	5.13423		5.64372	5.18805		7.90029	7.10673		7.29617	8.73886
YPR204W		4.18607	4.79505	9.18576	3.80811	8.55939	8.64287	9.51059	9.58612		3.80811	3.80811		4.18607	4.79505		8.64287	8.3434		6.41062	7.2872
YPR204C-A		3.55481	3.46764	4.79606	3.69627	8.80765	8.87201	9.58304	9.76623		3.69627	3.69627		3.55481	3.46764		8.87201	8.61466		7.11742	7.35747
YBL113W-A		11.2087	11.3488	5.58854	10.7816	8.76859	8.9605	9.89944	9.98554		10.7816	10.7816		11.2087	11.3488		8.9605	8.7807		7.06679	7.6794
YBL113C		10.0978	10.3137	8.88294	10.1943	8.61035	8.69385	9.57218	9.78173		10.1943	10.1943		10.0978	10.3137		8.69385	8.3964		6.94786	7.15408
YBL112C		9.89164	10.1355	7.63602	9.25965	7.99348	8.07417	9.16754	9.11784		9.25965	9.25965		9.89164	10.1355		8.07417	8.02358		5.86244	5.5979
YBL111C		9.04387	9.0903	7.50063	9.13208	7.74986	7.66532	8.36082	8.65613		9.13208	9.13208		9.04387	9.0903		7.66532	7.05791		3.94444	4.76564
YBL109W		6.02286	4.0672	4.52714	5.70526	5.64018	4.83644	6.51242	6.41635		5.70526	5.70526		6.02286	4.0672		4.83644	5.23411		2.631	2.71111
YBL108C-A		7.11147	6.52429	5.83223	7.64823	9.64678	6.34919	8.71663	9.11937		7.64823	7.64823		7.11147	6.52429		6.34919	5.98702		4.16409	6.0922
YBL108W		4.21331	4.12613	4.58607	4.53533	7.38973	2.21577	7.15636	6.87321		4.53533	4.53533		4.21331	4.12613		2.21577	6.31728		2.76593	2.84604
YBL107W-A		9.3249	7.82127	7.79018	9.44222	9.3166	9.01635	9.34803	10.1057		9.44222	9.44222		9.3249	7.82127		9.01635	8.82899		4.30907	4.23718
YBL086C		7.10564	8.8302	8.5511	8.18375	8.44237	7.47477	8.13576	9.34084		8.18375	8.18375		7.10564	8.8302		7.47477	9.5173		8.53043	8.25852
YBL085W		8.02862	7.40384	9.05081	9.0265	8.56002	8.81569	7.94097	8.09134		9.0265	9.0265		8.02862	7.40384		8.81569	8.71855		9.3282	9.33858
YBL064C		9.14643	13.4806	8.943	8.79423	11.5259	9.42809	13.9934	14.1332		8.79423	8.79423		9.14643	13.4806		9.42809	14.2109		10.6655	10.8966
YBL063W		6.79121	5.58253	7.60075	7.18623	6.24462	7.27437	6.01609	5.71209		7.18623	7.18623		6.79121	5.58253		7.27437	6.56363		7.7382	7.80892
YBR041W		10.4433	9.44209	9.05838	9.93624	8.67836	10.1958	9.90463	9.46868		9.93624	9.93624		10.4433	9.44209		10.1958	10.1444		9.78166	9.89034
YBR076W		5.70876	6.85632	2.93882	8.06225	7.86918	5.65695	8.82008	8.87615		8.06225	8.06225		5.70876	6.85632		5.65695	6.42122		5.64224	6.36872
YBR081C		7.43337	7.09212	8.70092	7.49806	7.67781	8.18692	7.14576	7.44687		7.49806	7.49806		7.43337	7.09212		8.18692	8.21657		8.73933	8.61171
YBR147W		4.33238	10.7991	5.35714	6.13479	9.88302	4.49946	10.5874	10.7364		6.13479	6.13479		4.33238	10.7991		4.49946	8.45372		5.18339	5.69646
YBR148W		4.84971	5.35885	6.00805	4.15303	7.34084	5.36549	8.07748	7.15095		4.15303	4.15303		4.84971	5.35885		5.36549	4.96462		4.50762	5.12378
YBR149W		11.0273	13.0313	10.3729	11.4508	11.2194	10.8786	12.3007	11.1342		11.4508	11.4508		11.0273	13.0313		10.8786	13.1303		11.4931	11.6126
YBR185C		9.28561	9.59765	9.3911	8.72239	8.58442	8.79728	9.44941	9.12472		8.72239	8.72239		9.28561	9.59765		8.79728	9.55925		8.86712	9.2461
YBR186W		7.47743	6.42427	3.39176	7.77382	6.21876	7.40758	6.70605	7.0653		7.77382	7.77382		7.47743	6.42427		7.40758	5.76536		6.62193	6.83784
YBR200W-A		5.10437	6.96168	5.47713	4.33893	8.9542	2.67217	6.64533	7.61227		4.33893	4.33893		5.10437	6.96168		2.67217	3.48015		3.65699	3.73711
YBR201W		8.11348	9.13312	8.8978	9.63674	9.57348	8.53471	8.82215	9.18578		9.63674	9.63674		8.11348	9.13312		8.53471	9.18376		8.92853	8.9301
YBR296C		11.2512	13.3246	7.66896	5.16233	6.51276	10.4548	6.57086	2.96318		5.16233	5.16233		11.2512	13.3246		10.4548	7.33033		3.23029	3.67298
YBR296C-A		5.6398	8.78959	6.01257	7.32193	5.86642	5.03037	3.1454	2.74977		7.32193	7.32193		5.6398	8.78959		5.03037	4.38023		4.11642	4.04454
YBR297W		7.81903	10.7458	7.76472	9.31361	8.94233	8.10445	9.73031	8.89522		9.31361	9.31361		7.81903	10.7458		8.10445	8.24408		6.73928	6.10445
YBR298C		7.92888	10.3931	6.93098	8.11912	8.37242	7.26892	11.489	11.0827		8.11912	8.11912		7.92888	10.3931		7.26892	7.8101		6.57384	6.61158
YBR298C-A		4.82828	4.5891	5.04904	0.758838	3.87856	3.35138	5.40988	3.01425		0.758838	0.758838		4.82828	4.5891		3.35138	2.33473		3.2289	3.15701
YBR299W		5.36764	7.57294	3.80317	4.4358	5.5965	5.88934	7.9506	6.40645		4.4358	4.4358		5.36764	7.57294		5.88934	6.1879		4.64599	5.32617
YBR301W		7.20383	6.32417	6.28412	6.26752	8.7932	6.0841	8.00425	7.9342		6.26752	6.26752		7.20383	6.32417		6.0841	5.36826		5.67149	5.76953
YBR300C		6.72734	6.02896	5.32794	4.38911	7.36057	5.44625	5.70373	6.97795		4.38911	4.38911		6.72734	6.02896		5.44625	5.16305		4.80028	5.31335
YBR302C		10.9198	11.29	8.36896	10.5209	10.2661	10.1118	11.8641	12.2674		10.5209	10.5209		10.9198	11.29		10.1118	10.7015		9.23482	9.26149
YCL076W		2.93153	2.84436	3.3043	0.75106	3.27216	0.448663	3.83506	3.72894		0.75106	0.75106		2.93153	2.84436		0.448663	0.155314		1.48416	1.41227
YCL073C		3.43191	4.76873	2.06771	5.19336	6.99615	4.45505	5.32983	6.06544		5.19336	5.19336		3.43191	4.76873		4.45505	5.65003		4.783	4.49961
YCL069W		5.09906	6.38933	2.49215	6.0853	7.52486	5.57636	5.47742	5.73891		6.0853	6.0853		5.09906	6.38933		5.57636	5.62997		5.33297	4.99805
YCL068C		6.44501	5.21513	6.63649	5.46743	5.22894	5.56423	5.67889	4.83965		5.46743	5.46743		6.44501	5.21513		5.56423	5.84924		5.02188	4.94999
YCL067C		7.13856	8.17686	8.802	8.05025	10.5219	7.63346	8.16502	9.57407		8.05025	8.05025		7.13856	8.17686		7.63346	8.34072		4.45422	6.32093
YCL066W		3.5023	3.99112	4.95107	4.05318	8.94638	2.81874	5.32983	5.0122		4.05318	4.05318		3.5023	3.99112		2.81874	3.32283		1.97892	1.90703
YCL065W		5.75618	5.96149	5.76046	6.2863	8.12495	5.74526	6.43171	6.03608		6.2863	6.2863		5.75618	5.96149		5.74526	6.49775		4.64784	6.16092
YCL049C		9.72495	10.7638	9.04635	10.0064	11.2166	9.29089	10.8311	9.85553		10.0064	10.0064		9.72495	10.7638		9.29089	10.0818		8.94419	8.90087
YCL048W-A		5.21581	13.9997	5.01257	3.60572	10.5634	3.95624	8.02533	5.80867		3.60572	3.60572		5.21581	13.9997		3.95624	6.46366		3.26843	5.51847
YCL048W		3.47223	4.88506	4.05252	3.87702	6.47529	3.2893	4.93128	4.79199		3.87702	3.87702		3.47223	4.88506		3.2893	5.40165		3.53973	2.24545
YCL025C		11.4058	12.1286	9.66491	11.1344	10.5198	8.99284	12.8637	12.9757		11.1344	11.1344		11.4058	12.1286		8.99284	10.5257		8.50119	8.89312
YCL024W		6.56452	6.96232	8.30706	6.56423	7.55895	7.34998	5.96607	5.78908		6.56423	6.56423		6.56452	6.96232		7.34998	7.17715		8.44421	8.57034
YCR038W-A		8.45277	7.2192	5.94218	6.53533	5.75812	7.16066	6.39694	5.41635		6.53533	6.53533		8.45277	7.2192		7.16066	6.43601		5.19804	5.12615
YCR038C		7.32166	7.20684	7.24728	7.05841	6.77833	7.01552	6.90537	6.12385		7.05841	7.05841		7.32166	7.20684		7.01552	7.24589		7.00315	7.21216
YCR039C		7.4016	8.28241	8.84129	8.09963	10.5205	7.74954	8.07814	9.35747		8.09963	8.09963		7.4016	8.28241		7.74954	8.41292		4.45422	6.44122
YCR040W		3.5783	3.41512	3.95107	4.05318	8.95875	2.42876	4.32983	5.57163		4.05318	4.05318		3.5783	3.41512		2.42876	3.0712		1.97892	3.05904
YCR041W		7.38602	6.60959	5.11608	7.57381	8.68321	7.6776	7.55284	8.17075		7.57381	7.57381		7.38602	6.60959		7.6776	7.44352		8.3195	8.45197
YCR098C		6.933	8.27749	8.03361	8.07368	6.53396	6.52858	12.6615	13.2295		8.07368	8.07368		6.933	8.27749		6.52858	7.08212		5.15573	5.6688
YCR099C		7.38103	8.09103	7.94702	8.69598	8.69521	7.75834	9.22875	9.09312		8.69598	8.69598		7.38103	8.09103		7.75834	8.82748		7.21184	7.32053
YCR100C		7.01052	7.38814	7.39652	8.18482	8.32317	7.54152	9.27389	8.8955		8.18482	8.18482		7.01052	7.38814		7.54152	8.47503		6.74145	7.04302
YCR101C		5.71819	7.03469	6.917	7.86669	8.01501	6.99175	8.74026	8.51536		7.86669	7.86669		5.71819	7.03469		6.99175	7.79107		5.98155	5.58773
YCR102C		6.40421	6.16901	6.89697	5.68028	7.97943	6.24231	10.4669	9.7982		5.68028	5.68028		6.40421	6.16901		6.24231	12.518		6.67759	6.34854
YCR102W-A		4.91734	5.33016	5.2141	4.39783	7.62837	3.70546	8.18965	7.60557		4.39783	4.39783		4.91734	5.33016		3.70546	8.36477		5.86789	6.644
YCR104W		3.99595	3.83277	4.44471	4.67807	7.60518	4.87299	7.17711	7.1159		4.67807	4.67807		3.99595	3.83277		4.87299	7.83107		5.43193	5.87461
YCR105W		7.33037	8.92617	6.21801	8.31568	7.8849	7.61708	8.22801	7.45857		8.31568	8.31568		7.33037	8.92617		7.61708	8.45514		6.67547	6.8766
YCR106W		7.06117	7.04157	7.57335	8.43284	7.70375	8.13374	7.18395	7.48443		8.43284	8.43284		7.06117	7.04157		8.13374	9.41978		7.53204	7.51673
YDL248W		9.70927	10.4787	7.99546	11.0302	9.70597	9.42352	10.7951	11.1456		11.0302	11.0302		9.70927	10.4787		9.42352	10.1448		8.54455	8.27336
YDL247W-A		8.97884	8.50286	7.19064	9.30933	8.14693	8.31304	4.97548	3.57985		9.30933	9.30933		8.97884	8.50286		8.31304	7.0665		8.11642	7.87461
YDL247W		7.12393	7.37667	4.85399	7.80427	6.82793	7.15127	4.17402	2.29297		7.80427	7.80427		7.12393	7.37667		7.15127	6.58244		6.38209	6.2658
YDL246C		5.86127	7.66771	7.32063	8.08975	7.20451	6.18087	5.9935	-0.26011		8.08975	8.08975		5.86127	7.66771		6.18087	8.63459		5.96452	5.61961
YDL245C		5.23821	7.99697	2.18475	6.33249	7.2996	5.70238	5.80944	6.93814		6.33249	6.33249		5.23821	7.99697		5.70238	6.42396		4.76254	5.27561
YDL244W		5.51479	8.46456	4.32455	6.57085	9.08172	5.45666	8.4678	6.45393		6.57085	6.57085		5.51479	8.46456		5.45666	6.66867		4.63616	4.6898
YDL228C		16.2843	13.1035	7.27181	15.788	12.6334	16.4867	11.7218	10.8638		15.788	15.788		16.2843	13.1035		16.4867	12.426		14.812	14.4287
YDL227C		8.44357	6.60356	10.0747	7.94128	8.74012	9.30819	4.37631	3.61145		7.94128	7.94128		8.44357	6.60356		9.30819	5.07979		10.1547	10.2667
YDL169C		3.65438	10.0737	4.02714	5.82073	8.74263	3.67463	9.76035	10.0421		5.82073	5.82073		3.65438	10.0737		3.67463	8.312		6.17532	6.79857
YDL168W		10.7497	11.4824	10.9276	10.1175	9.94764	10.4873	13.2076	13.735		10.1175	10.1175		10.7497	11.4824		10.4873	12.6778		10.5488	10.5965
YDL115C		8.17178	8.92676	9.46596	9.21702	9.75769	8.3873	9.41058	10.4584		9.21702	9.21702		8.17178	8.92676		8.3873	9.93737		9.01365	9.1287
YDL114W		4.05875	3.67909	3.56303	4.37239	6.33453	2.99316	6.20585	7.06077		4.37239	4.37239		4.05875	3.67909		2.99316	3.10333		3.31889	1.247
YDL007C-A		4.45947	5.02429	4.83223	4.01596	5.0649	1.97659	5.00042	3.79744		4.01596	4.01596		4.45947	5.02429		1.97659	1.68325		3.01209	2.9402
YDL007W		11.085	10.5977	11.5205	11.6571	10.9655	11.0491	10.5143	10.8283		11.6571	11.6571		11.085	10.5977		11.0491	11.993		11.5545	11.6317
YDR034C-A		13.4773	12.7269	5.37585	15.2149	13.5647	14.1314	11.6585	12.5795		15.2149	15.2149		13.4773	12.7269		14.1314	13.3156		6.02964	5.95775
YDR034W-B		5.76129	13.3698	7.37102	9.39713	8.18789	6.75917	12.3304	11.2063		9.39713	9.39713		5.76129	13.3698		6.75917	8.97971		4.88992	5.40299
YDR035W		12.049	10.919	11.8993	11.4957	12.5016	11.3316	11.223	12.1502		11.4957	11.4957		12.049	10.919		11.3316	12.1126		11.0899	11.0904
YDR217C		6.50431	6.39539	8.0822	7.25479	7.54504	7.74778	6.13435	6.12102		7.25479	7.25479		6.50431	6.39539		7.74778	6.96946		7.98989	7.91466
YDR218C		3.52629	6.21127	3.68258	6.14726	7.46862	4.21188	6.38327	7.18927		6.14726	6.14726		3.52629	6.21127		4.21188	4.45119		3.18436	1.79055
YDR278C		4.15781	4.14663	4.53057	0.392374	3.8514	1.72561	5.97888	7.62507		0.392374	0.392374		4.15781	4.14663		1.72561	4.52602		2.71043	2.63854
YDR374C		3.49212	4.77342	3.5724	4.50206	4.73666	2.40008	4.60517	4.96161		4.50206	4.50206		3.49212	4.77342		2.40008	3.5115		1.17626	1.25637
YDR374W-A		9.49707	10.4664	10.0802	9.2209	10.7631	9.32476	9.5198	10.4288		9.2209	9.2209		9.49707	10.4664		9.32476	9.27932		8.65309	9.04898
YDR446W		4.21856	3.13138	3.66732	2.78401	4.41081	3.34612	3.69809	4.83851		2.78401	2.78401		4.21856	3.13138		3.34612	1.21333		4.51711	5.08265
YDR498C		9.23871	8.92765	9.26437	9.20333	9.11767	9.13526	8.60043	8.60453		9.20333	9.20333		9.23871	8.92765		9.13526	9.15592		9.10343	9.04725
YDR499W		6.75164	7.7381	7.85724	7.2721	7.61386	7.41701	6.97331	7.54718		7.2721	7.2721		6.75164	7.7381		7.41701	7.03756		8.03782	8.15148
YDR522C		6.44409	6.6723	2.28408	6.69277	6.48783	6.31131	5.45228	4.15618		6.69277	6.69277		6.44409	6.6723		6.31131	6.42593		5.31638	4.54405
YDR541C		9.6626	9.12999	9.1984	9.78787	10.8276	9.4534	8.97678	8.71509		9.78787	9.78787		9.6626	9.12999		9.4534	9.79784		8.31977	8.48033
YDR542W		6.31503	5.93537	4.41563	7.61928	8.43499	5.56761	7.8903	7.51429		7.61928	7.61928		6.31503	5.93537		5.56761	5.61271		2.67149	5.5996
YDR543C		4.24188	4.1547	4.61464	3.0614	3.72735	1.80967	6.1454	6.3872		3.0614	3.0614		4.24188	4.1547		1.80967	1.84966		2.7945	2.72261
YDR544C		3.80186	3.71468	4.09862	5.57513	4.46199	4.54539	6.45946	6.52327		5.57513	5.57513		3.80186	3.71468		4.54539	4.93823		2.27848	2.3586
YDR545W		10.3644	10.4934	8.71055	10.3806	8.25439	8.41891	8.84001	9.03346		10.3806	10.3806		10.3644	10.4934		8.41891	8.15524		3.30254	6.59584
YDR545C-A		11.9235	12.0288	4.80505	11.5284	8.91684	9.04576	9.3635	9.83251		11.5284	11.5284		11.9235	12.0288		9.04576	8.78111		4.59036	7.15074
YEL077W-A		11.1642	10.9976	5.40726	10.4169	8.67805	8.83008	9.49787	9.63088		10.4169	10.4169		11.1642	10.9976		8.83008	8.57366		7.25944	7.6794
YEL077C		9.55951	9.67566	8.67561	9.60213	8.13513	8.26241	9.09975	9.22934		9.60213	9.60213		9.55951	9.67566		8.26241	8.01527		7.24796	6.93351
YEL075W-A		7.8112	7.96129	6.61552	8.44222	6.87186	7.36946	7.57627	7.61737		8.44222	8.44222		7.8112	7.96129		7.36946	6.87974		5.08786	4.16797
YEL076C-A		6.92257	7.3738	6.4915	8.00152	6.59029	7.17373	7.37663	7.20497		8.00152	8.00152		6.92257	7.3738		7.17373	6.6616		6.98666	5.32981
YEL076C		7.31991	7.56645	6.93387	8.42752	6.83792	7.45621	7.74043	7.51743		8.42752	8.42752		7.31991	7.56645		7.45621	6.93606		6.7357	4.07884
YEL075C		8.50211	8.07268	6.92143	8.63311	7.29284	7.48183	7.69919	7.47102		8.63311	8.63311		8.50211	8.07268		7.48183	7.04994		2.64784	3.57595
YEL074W		7.84625	7.21534	5.3828	8.70951	7.66182	8.18671	8.89719	8.76985		8.70951	8.70951		7.84625	7.21534		8.18671	8.09108		4.77018	4.69829
YEL073C		7.45277	8.76031	7.66679	8.35409	11.4288	7.46471	11.4494	11.3064		8.35409	8.35409		7.45277	8.76031		7.46471	7.98493		5.1574	5.57094
YEL072W		7.34072	6.79301	8.60678	7.16318	10.8125	7.83384	8.23709	8.96935		7.16318	7.16318		7.34072	6.79301		7.83384	7.75867		7.4048	7.18405
YEL070W		4.87067	7.2658	3.59705	4.16825	7.50728	5.46896	13.4339	11.7067		4.16825	4.16825		4.87067	7.2658		5.46896	6.64105		3.78587	4.71398
YER010C		10.2015	10.8216	9.4263	9.23954	10.3613	9.87658	10.7995	10.9517		9.23954	9.23954		10.2015	10.8216		9.87658	10.5353		9.75276	9.86595
YER011W		12.7472	8.41526	7.70863	10.1407	15.6149	11.9101	17.6477	17.0887		10.1407	10.1407		12.7472	8.41526		11.9101	10.9109		10.4509	9.84604
YER083C		11.7269	11.1035	10.9533	10.4382	10.218	10.7218	11.4623	10.8615		10.4382	10.4382		11.7269	11.1035		10.7218	11.0452		10.402	10.4057
YER084W-A		3.54388	5.0327	3.84064	3.40288	7.03778	4.25029	6.15568	6.42056		3.40288	3.40288		3.54388	5.0327		4.25029	4.55428		2.1725	4.68558
YER086W		12.8239	11.1762	11.2667	11.9411	11.2028	12.4317	10.5671	10.2023		11.9411	11.9411		12.8239	11.1762		12.4317	10.8167		11.3501	11.2634
YER105C		9.37487	8.64715	9.14465	8.97341	8.01225	9.59502	9.79432	9.80936		8.97341	8.97341		9.37487	8.64715		9.59502	9.11649		9.07371	9.0485
YER106W		3.79456	3.13138	5.48925	2.57756	8.24192	2.8831	4.89972	5.47238		2.57756	2.57756		3.79456	3.13138		2.8831	2.78014		4.34718	3.86025
YER111C		7.32218	7.55952	7.92559	6.59095	7.21275	7.80282	7.90764	8.11557		6.59095	6.59095		7.32218	7.55952		7.80282	6.74587		8.50619	8.63252
YER112W		9.80191	9.18562	11.1615	9.87632	10.3577	9.95884	8.58044	9.56393		9.87632	9.87632		9.80191	9.18562		9.95884	9.66246		10.8623	10.8465
YER186C		10.0129	9.77495	9.72312	9.73164	9.83622	10.0154	9.0011	9.8071		9.73164	9.73164		10.0129	9.77495		10.0154	9.61997		9.41572	9.57379
YER187W		7.27867	7.15103	7.27194	7.39681	9.76341	5.86653	9.49749	9.85532		7.39681	7.39681		7.27867	7.15103		5.86653	6.17215		6.14105	7.01258
YER188W		7.34607	7.46484	7.68677	7.68508	10.98	6.53121	9.69544	10.7742		7.68508	7.68508		7.34607	7.46484		6.53121	7.39575		6.20703	6.74086
YER188C-A		6.18636	6.76014	5.26664	6.2578	6.14939	6.00672	6.3678	7.19456		6.2578	6.2578		6.18636	6.76014		6.00672	5.18907		5.26843	5.87461
YER189W		7.87634	8.47045	7.12895	8.79249	7.48769	7.52798	7.74291	7.56659		8.79249	8.79249		7.87634	8.47045		7.52798	7.36702		5.4552	4.57595
YER190W		10.1642	10.3135	8.65792	9.79342	8.1474	8.27592	8.98685	9.11553		9.79342	9.79342		10.1642	10.3135		8.27592	7.93654		5.08385	3.7094
YER190C-A		10.0175	10.2903	4.9105	9.09375	8.89753	8.86933	9.97395	10.0713		9.09375	9.09375		10.0175	10.2903		8.86933	8.69049		2.00539	1.7815
YER190C-B		11.8013	11.8736	4.50358	10.9921	8.80362	8.86771	9.6013	9.6872		10.9921	10.9921		11.8013	11.8736		8.86771	8.71509		5.25944	2.03555
YFL068W		9.23581	9.50228	4.00358	6.4618	8.55797	8.42871	9.42284	9.56167		6.4618	6.4618		9.23581	9.50228		8.42871	8.1594		3.8444	4.77251
YFL067W		7.14294	7.3058	3.87507	6.3613	8.09186	7.99228	9.93798	10.2701		6.3613	6.3613		7.14294	7.3058		7.99228	7.81539		6.21839	7.18832
YFL066C		6.12404	6.55778	8.89927	4.94485	8.02936	8.19253	9.32738	9.4223		4.94485	4.94485		6.12404	6.55778		8.19253	7.83007		5.67241	5.80697
YFL065C		7.48463	7.15473	8.03868	6.73757	7.58521	7.64786	7.29039	7.66649		6.73757	6.73757		7.48463	7.15473		7.64786	6.90788		4.48882	6.15389
YFL064C		6.71992	6.37679	6.30951	5.77761	7.57222	7.63551	7.70728	7.72669		5.77761	5.77761		6.71992	6.37679		7.63551	7.05521		3.72411	4.38918
YFL063W		3.7138	3.55063	4.01057	-0.27964	5.2112	2.94257	5.76372	5.88267		-0.27964	-0.27964		3.7138	3.55063		2.94257	1.29625		2.19043	2.11854
YFL062W		9.64967	10.1263	4.74432	11.6833	9.67669	9.47735	11.5433	11.8706		11.6833	11.6833		9.64967	10.1263		9.47735	9.719		8.16005	8.19654
YFL061W		6.80252	8.06556	5.59032	-0.85189	7.40687	6.63807	9.33054	8.01086		-0.85189	-0.85189		6.80252	8.06556		6.63807	7.35524		5.77018	4.86821
YFL060C		6.72547	8.64151	7.37138	-0.83261	8.63003	7.15599	9.39963	9.63226		-0.83261	-0.83261		6.72547	8.64151		7.15599	8.07973		6.43331	5.71757
YFL059W		7.34137	10.0149	7.73287	-1.25571	8.92479	7.67378	9.70595	9.51146		-1.25571	-1.25571		7.34137	10.0149		7.67378	9.68689		6.61428	6.61639
YFL058W		3.91659	8.46592	4.49687	6.72903	8.53034	5.21434	7.79816	6.01953		6.72903	6.72903		3.91659	8.46592		5.21434	6.11492		2.76169	0.952836
YFL054C		7.56937	9.6296	6.98217	6.94254	8.02112	7.1966	10.4283	9.50996		6.94254	6.94254		7.56937	9.6296		7.1966	10.7274		7.3402	7.24693
YFL053W		4.98925	5.14478	2.91752	6.70526	6.03158	6.21054	9.45701	8.53585		6.70526	6.70526		4.98925	5.14478		6.21054	9.40357		5.46837	4.63094
YFL052W		5.48823	8.10257	2.54631	5.18684	6.35457	5.05361	10.4178	9.54315		5.18684	5.18684		5.48823	8.10257		5.05361	5.16857		3.89609	3.65428
YFL051C		4.9993	7.66337	4.00358	6.67202	6.22413	4.80891	8.56454	6.41635		6.67202	6.67202		4.9993	7.66337		4.80891	5.1237		4.25944	4.99491
YFL016C		8.94056	10.526	10.478	10.497	10.0375	8.86473	10.8955	10.7419		10.497	10.497		8.94056	10.526		8.86473	9.682		10.0942	10.1387
YFL015C		4.59541	3.50823	3.96817	1.75397	6.34977	1.52187	3.57494	5.31681		1.75397	1.75397		4.59541	3.50823		1.52187	4.43097		2.07203	3.15214
YFL014W		7.91734	17.5015	10.3194	6.67879	14.1545	8.73705	14.5256	13.6362		6.67879	6.67879		7.91734	17.5015		8.73705	14.1322		10.5369	11.7172
YFL013W-A		8.38927	8.81501	5.13689	8.63917	9.65986	8.52285	8.97531	9.59641		8.63917	8.63917		8.38927	8.81501		8.52285	9.10001		9.34445	9.37124
YFL011W		2.94234	7.67979	2.2391	3.90754	5.97467	3.19838	5.35683	4.58774		3.90754	3.90754		2.94234	7.67979		3.19838	3.63396		2.81689	2.745
YFL010W-A		11.6697	11.1293	6.42561	10.7793	11.8936	11.4277	10.6605	10.235		10.7793	10.7793		11.6697	11.1293		11.4277	12.2881		12.1368	12.0254
YFL003C		4.61514	5.65948	4.74519	5.59796	6.63394	5.33328	4.81689	6.15823		5.59796	5.59796		4.61514	5.65948		5.33328	5.29919		4.85503	4.90867
YFR016C		7.99973	8.31012	8.76279	7.16405	8.78864	7.95161	9.0102	9.65632		7.16405	7.16405		7.99973	8.31012		7.95161	8.70274		9.35052	9.43545
YFR023W		2.99683	5.59685	3.31407	2.18483	7.25996	3.4357	5.36195	6.66676		2.18483	2.18483		2.99683	5.59685		3.4357	3.28824		2.33297	0.261079
YFR052C-A		9.94776	13.1749	8.22671	7.60774	11.0353	7.07594	16.9018	16.7984		7.60774	7.60774		9.94776	13.1749		7.07594	11.9372		11.7381	12.3116
YFR053C		9.90851	13.3996	8.89827	7.24533	11.5425	7.05788	17.1807	17.066		7.24533	7.24533		9.90851	13.3996		7.05788	12.267		11.6969	12.2665
YFR054C		5.23776	5.68003	3.74204	4.84977	6.49066	6.04152	4.72732	0.479244		4.84977	4.84977		5.23776	5.68003		6.04152	6.14353		4.80525	3.51097
YFR057W		4.28981	3.55063	4.01057	-0.27964	3.78421	1.2056	1.37141	0.823774		-0.27964	-0.27964		4.28981	3.55063		1.2056	0.861583		2.34243	2.11854
YGL263W		7.04905	6.36555	2.68485	8.22789	7.26178	7.87041	6.11178	5.32248		8.22789	8.22789		7.04905	6.36555		7.87041	7.03471		6.26464	6.52978
YGL262W		4.0783	6.15209	3.79906	5.41575	7.32064	4.16199	5.91479	6.19054		5.41575	5.41575		4.0783	6.15209		4.16199	4.32283		2.13092	3.05904
YGL261C		4.91135	5.24817	4.91563	5.52336	8.46347	5.13727	7.98587	7.47477		5.52336	5.52336		4.91135	5.24817		5.13727	5.1486		2.67149	2.4476
YGL260W		4.61894	4.53177	4.99171	6.52593	6.2578	2.13607	6.52247	6.41635		6.52593	6.52593		4.61894	4.53177		2.13607	3.43537		3.17157	3.09968
YGL259W		6.32366	8.18993	3.88346	7.48672	8.49472	5.34776	9.61062	9.56976		7.48672	7.48672		6.32366	8.18993		5.34776	9.08604		4.21532	4.95078
YGL258W-A		5.17633	7.45763	4.97309	7.82358	8.63462	5.94589	7.88852	7.96067		7.82358	7.82358		5.17633	7.45763		5.94589	8.76861		5.62688	6.04042
YGL251C		6.20142	7.26095	6.90526	7.2251	6.24282	7.07147	8.26511	8.00577		7.2251	7.2251		6.20142	7.26095		7.07147	7.54693		6.63771	6.78305
YGL250W		8.73897	9.9619	7.70056	8.34098	8.92084	7.88013	9.52065	9.71635		8.34098	8.34098		8.73897	9.9619		7.88013	9.44353		8.16335	8.22896
YGL170C		5.65893	3.54955	4.50949	5.9737	6.12211	5.85557	3.7332	3.11518		5.9737	5.9737		5.65893	3.54955		5.85557	3.7136		6.25442	5.52542
YGL169W		10.2974	9.19752	10.504	10.0351	8.81179	10.2398	8.51424	7.05547		10.0351	10.0351		10.2974	9.19752		10.2398	7.73996		9.33205	9.19823
YGL158W		4.48836	4.5327	4.97232	4.71739	6.24437	4.97727	8.29951	5.77548		4.71739	4.71739		4.48836	4.5327		4.97727	4.18136		4.58754	4.68558
YGL157W		10.1262	6.67754	10.4242	10.2543	9.93064	10.1834	7.57727	6.19015		10.2543	10.2543		10.1262	6.67754		10.1834	12.0825		10.4489	10.5431
YGL138C		3.0271	2.36392	2.89987	1.27063	6.24014	0.786901	0.184706	-0.36293		1.27063	1.27063		3.0271	2.36392		0.786901	0.355206		2.74069	0.931836
YGL137W		10.8818	10.201	10.9545	10.6935	9.76274	11.1786	10.064	10.4166		10.6935	10.6935		10.8818	10.201		11.1786	11.148		10.9022	10.8015
YGL033W		4.9246	4.51871	5.47865	5.74734	4.97009	3.92928	3.18749	6.11379		5.74734	5.74734		4.9246	4.51871		3.92928	4.92708		4.89548	4.30901
YGR068C		8.39543	8.11175	8.50081	7.5955	8.28297	7.93335	8.47197	8.10063		7.5955	7.5955		8.39543	8.11175		7.93335	7.07956		8.42104	8.3156
YGR070W		6.7879	8.85526	5.90327	6.96218	7.4006	6.71955	10.7419	10.6153		6.96218	6.96218		6.7879	8.85526		6.71955	8.59862		7.05929	7.38794
YGR087C		3.85163	9.54676	2.77095	1.44017	8.22156	2.9386	11.0151	11.5469		1.44017	1.44017		3.85163	9.54676		2.9386	5.45946		3.4508	2.37892
YGR225W		3.5425	6.36966	4.02646	2.69056	6.68888	3.08508	8.43491	8.74335		2.69056	2.69056		3.5425	6.36966		3.08508	3.71358		4.47257	4.75432
YGR226C		5.90845	7.22495	5.12921	1.99101	7.20923	2.75891	8.81198	9.4073		1.99101	1.99101		5.90845	7.22495		2.75891	4.29618		4.46107	5.38918
YGR227W		10.3347	9.69474	8.66077	9.50921	7.63678	9.88694	8.38455	8.2237		9.50921	9.50921		10.3347	9.69474		9.88694	9.31425		8.82756	8.75101
YGR258C		6.61147	7.94003	7.62937	7.35224	8.361	7.36364	7.98315	8.61229		7.35224	7.35224		6.61147	7.94003		7.36364	8.14687		8.23734	7.99106
YGR271C-A		8.75233	6.82612	11.5446	9.27783	9.45029	9.5292	6.87825	6.79628		9.27783	9.27783		8.75233	6.82612		9.5292	5.07636		9.85954	9.80797
YGR273C		3.43452	3.34734	3.80728	1.66908	5.68087	2.63197	3.16812	0.62049		1.66908	1.66908		3.43452	3.34734		2.63197	1.47697		2.13915	1.91525
YGR289C		7.39257	9.08907	6.02215	8.25418	7.65118	6.58412	8.22673	8.36397		8.25418	8.25418		7.39257	9.08907		6.58412	7.69505		6.3436	6.47816
YGR291C		4.67628	4.6651	5.04904	0.910841	2.06011	2.62807	2.25788	1.86225		0.910841	0.910841		4.67628	4.6651		2.62807	1.95073		4.3809	3.15701
YGR292W		5.36764	7.53099	4.59565	5.76089	5.48291	5.85721	7.60197	6.19128		5.76089	5.76089		5.36764	7.53099		5.85721	6.02295		5.0985	5.02661
YGR294W		6.9408	5.69266	5.99163	6.61082	8.69018	6.22221	8.34433	8.15033		6.61082	6.61082		6.9408	5.69266		6.22221	5.69756		5.25646	5.18457
YGR293C		6.91365	6.08745	4.64371	6.15729	7.41782	5.67381	6.10744	6.54188		6.15729	6.15729		6.91365	6.08745		5.67381	5.36467		5.783	5.57361
YGR295C		11.4649	11.8237	10.3211	12.8226	11.0192	11.0418	11.0822	11.3767		12.8226	12.8226		11.4649	11.8237		11.0418	10.7536		10.2175	10.1554
YGR296W		7.51075	7.62315	8.49961	6.91928	8.12038	8.27216	8.8772	9.02138		6.91928	6.91928		7.51075	7.62315		8.27216	7.85783		4.99528	3.78954
YGR296C-A		9.15214	9.20665	5.11802	6.26325	8.9151	8.89971	9.91702	10.092		6.26325	6.26325		9.15214	9.20665		8.89971	8.57492		2.00539	1.7815
YGR296C-B		6.27146	5.7806	5.16454	4.0373	8.80403	9.03446	9.58304	9.87293		4.0373	4.0373		6.27146	5.7806		9.03446	8.69816		5.8444	4.18755
YHL050W-A		5.4993	5.52332	5.37206	6.23232	8.83187	8.86278	10.0698	10.3106		6.23232	6.23232		5.4993	5.52332		8.86278	8.48785		5.8444	6.71111
YHL050C		5.58478	6.29762	8.67566	5.42938	8.14152	8.10648	9.3133	9.51007		5.42938	5.42938		5.58478	6.29762		8.10648	7.76391		5.93792	6.20307
YHL049C		4.61123	4.15557	7.86677	4.31823	7.85459	7.57013	7.57627	8.18609		4.31823	4.31823		4.61123	4.15557		7.57013	7.04526		2.50289	4.01597
YHL048C-A		5.46988	5.8827	5.84264	3.62844	8.56072	3.34567	8.33694	9.52627		3.62844	3.62844		5.46988	5.8827		3.34567	3.58065		3.9465	4.02661
YHL048W		9.68871	10.6461	8.60652	11.5569	10.3764	9.65659	9.9276	10.3134		11.5569	11.5569		9.68871	10.6461		9.65659	10.578		8.55982	8.7224
YHL046C		6.07232	7.05389	4.33963	5.44936	9.02606	5.85511	8.27033	7.69716		5.44936	5.44936		6.07232	7.05389		5.85511	6.41135		3.67149	4.5996
YHL045W		4.10375	5.01657	5.269	5.54772	7.04858	4.33251	5.76135	3.36572		5.54772	5.54772		4.10375	5.01657		4.33251	6.60412		4.31734	4.98241
YHL044W		8.29779	9.70772	6.57159	8.56857	9.7663	7.20979	8.49824	8.0064		8.56857	8.56857		8.29779	9.70772		7.20979	8.4214		7.02964	7.19041
YHL043W		7.74385	9.21586	4.49265	8.85219	8.85788	7.89406	9.47761	9.37571		8.85219	8.85219		7.74385	9.21586		7.89406	9.34533		7.42043	7.27054
YHL038C		7.30088	7.42803	8.52782	7.70449	8.07681	7.72758	7.7441	8.2665		7.70449	7.70449		7.30088	7.42803		7.72758	8.38794		7.88877	8.02433
YHL036W		8.63264	7.67979	6.52191	10.4938	10.362	7.68046	8.46645	9.30946		10.4938	10.4938		8.63264	7.67979		7.68046	8.46243		7.23643	7.12351
YHR005C-A		12.7083	12.0162	13.7312	12.27	11.8178	12.635	10.4656	9.75127		12.27	12.27		12.7083	12.0162		12.635	11.5675		12.6651	12.8094
YHR006W		7.63875	9.2459	9.04423	8.23659	10.4807	8.52759	9.39982	9.32146		8.23659	8.23659		7.63875	9.2459		8.52759	9.44951		8.89191	8.82002
YHR053C		12.998	14.5332	14.5859	14.836	16.4994	13.4621	15.9142	16.0259		14.836	14.836		12.998	14.5332		13.4621	15.0405		12.5904	15.5451
YHR054C		9.29321	10.8962	7.80023	7.80344	9.47262	8.75104	8.30753	8.41737		7.80344	7.80344		9.29321	10.8962		8.75104	8.28165		8.72601	9.08571
YHR054W-A		13.0542	14.6918	8.61785	14.8871	16.4357	13.5664	15.8939	16.0302		14.8871	14.8871		13.0542	14.6918		13.5664	15.1605		12.9495	15.801
YHR055C		13.0112	14.6227	14.6886	14.8235	16.4931	13.4782	15.9183	16.0399		14.8235	14.8235		13.0112	14.6227		13.4782	15.0697		12.6751	15.5214
YHR079C		8.42582	8.10091	7.85158	8.63823	7.63338	8.78197	9.36789	8.8628		8.63823	8.63823		8.42582	8.10091		8.78197	7.92011		8.33968	8.14589
YHR079C-A		4.83933	4.53567	4.34361	1.20541	7.07385	2.92265	2.70445	4.11618		1.20541	1.20541		4.83933	4.53567		2.92265	3.87495		4.26044	3.60358
YHR125W		4.21331	4.70213	4.58607	2.44787	7.55825	1.7811	6.94691	7.83668		2.44787	2.44787		4.21331	4.70213		1.7811	2.97906		2.76593	2.84604
YHR126C		3.5638	6.45056	4.01257	0.798366	7.70042	2.23891	6.38487	6.18718		0.798366	0.798366		3.5638	6.45056		2.23891	5.14434		2.11643	3.19654
YHR127W		9.04564	8.41214	10.3455	8.79689	8.91509	9.47328	7.19639	7.391		8.79689	8.79689		9.04564	8.41214		9.47328	9.14181		9.69854	9.66988
YHR184W		5.4425	4.74413	6.20407	5.69513	7.4401	5.09324	3.45946	3.87119		5.69513	5.69513		5.4425	4.74413		5.09324	4.79516		4.88992	4.75091
YHR185C		4.06691	2.90374	4.01568	3.31294	5.21734	2.49066	0.724517	0.328887		3.31294	3.31294		4.06691	2.90374		2.49066	1.89502		2.69554	3.94558
YHR212W-A		7.24275	5.36309	5.74703	6.16211	6.39907	6.73746	5.33923	3.7212		6.16211	6.16211		7.24275	5.36309		6.73746	6.83368		6.67282	5.01597
YHR214C-D		4.27102	5.05233	4.71979	4.50558	5.73113	3.66346	2.00462	1.45699		4.50558	4.50558		4.27102	5.05233		3.66346	2.6468		3.97565	3.90376
YHR215W		12.8907	8.67911	12.8197	8.47514	8.85833	11.9089	7.2247	7.87298		8.47514	8.47514		12.8907	8.67911		11.9089	8.35874		7.63886	7.10753
YHR217C		5.56343	3.60777	3.99171	5.4081	4.57024	4.89053	7.67448	7.49608		5.4081	5.4081		5.56343	3.60777		4.89053	4.94842		2.17157	2.09968
YHR218W		4.28723	4.98563	7.62907	4.18018	7.76803	7.76031	8.46909	8.64834		4.18018	4.18018		4.28723	4.98563		7.76031	7.17851		5.13319	4.78828
YHR218W-A		4.15781	4.07063	8.60845	2.7143	7.99256	8.25725	8.89141	8.74371		2.7143	2.7143		4.15781	4.07063		8.25725	7.7557		5.4474	6.24998
YHR219W		6.99595	7.35009	8.97937	5.0614	8.70011	8.73985	9.67036	9.89527		5.0614	5.0614		6.99595	7.35009		8.73985	8.45028		4.69496	5.31822
YHR219C-A		3.63082	4.91212	5.00358	3.9593	8.77139	8.82287	9.6678	9.93718		3.9593	3.9593		3.63082	4.91212		8.82287	8.48424		4.8444	3.77251
YIL177W-A		10.7785	10.9325	5.07958	10.4583	8.56115	8.93511	9.34911	9.344		10.4583	10.4583		10.7785	10.9325		8.93511	8.86405		8.25944	8.37738
YIL177C		9.13753	9.44341	8.5189	9.38269	7.73236	8.05634	8.82986	8.9154		9.38269	9.38269		9.13753	9.44341		8.05634	7.8851		7.34045	6.86439
YIL171W-A		4.22333	7.29711	4.02009	3.05181	5.44376	4.71389	7.35821	6.71322		3.05181	3.05181		4.22333	7.29711		4.71389	4.52039		3.93691	3.28006
YIL172C		4.52932	6.81576	5.58337	3.30804	5.7721	5.67417	7.55431	6.9675		3.30804	3.30804		4.52932	6.81576		5.67417	6.51922		4.38579	3.12125
YIL145C		11.506	10.1318	11.069	10.7087	10.4188	10.9746	9.69415	9.49254		10.7087	10.7087		11.506	10.1318		10.9746	11.0572		10.0591	10.1432
YIL144W		7.4026	7.03915	8.64691	7.00985	8.56546	7.36519	7.26685	8.51018		7.00985	7.00985		7.4026	7.03915		7.36519	6.53422		8.70647	8.70955
YIL057C		4.09541	14.5844	3.96817	1.75397	4.57397	2.07366	5.83798	4.94484		1.75397	1.75397		4.09541	14.5844		2.07366	6.42768		3.22403	5.15214
YIR039C		6.92047	9.68238	6.69616	6.40198	8.63707	6.48142	10.7737	10.8122		6.40198	6.40198		6.92047	9.68238		6.48142	10.3717		6.16275	6.35389
YIR040C		4.09131	4.94862	4.46408	7.81773	7.5	4.45272	6.86931	7.12973		7.81773	7.81773		4.09131	4.94862		4.45272	5.80766		2.64394	2.57205
YIR041W		3.91995	3.83277	4.36871	0.002507	7.06706	3.71985	5.56044	5.25792		0.002507	0.002507		3.91995	3.83277		3.71985	4.94616		2.62457	2.55268
YIR042C		8.16708	8.04471	8.94841	-0.92045	9.20017	7.46637	0.578588	0.182958		-0.92045	-0.92045		8.16708	8.04471		7.46637	8.0364		6.6085	6.83918
