# Supplementary material for: Environmental change drives accelerated adaptation through stimulated copy number variation
Source: PLoS Biol. 2017 Jun 27;15(6):e2001333. doi: 10.1371/journal.pbio.2001333 (PMC5486974; doi:10.1371/journal.pbio.2001333)
Supplement: S4 Data — (XLSX) [file pbio.2001333.s016.xlsx]

## Sheet: Description
		This workbook contains the raw data for the Northern blots.
		Band intensities were calculated using ImageQuant.
		Quantification included for Fig 4C, S3B Fig, S4 Fig, and S6D Fig.
		Arbitary RNA expression levels, shown here, were calculated by specific band intensity from probing / ethidium bromide image 25S (Fig 4C, S3B Fig & S4 Fig) or 18S (Fig S6D) band intesity x 100

## Sheet: 4C
CUP1 ORF
WT		rtt109Δ
-	+	-	+	5mM Nicotinamide
5.68691	10.4058	9.57652	9.29847
3.68977	8.44634	7.44191	7.52148
8.34038	9.13954	9.88792	7.05166
8.46319	15.4149	13.849	9.2736
CUP1 CUT
WT		rtt109Δ
-	+	-	+	5mM Nicotinamide
0.117733	1.37245	0.267922	0.852635
0.0967	0.801041	0.219982	0.762304
0.148552	0.871724	0.277768	0.859208
0.190376	1.32121	0.427351	1.16712

## Sheet: S3B
CUP1 ORF
WT	mrc1Δ	pol32Δ
285.643	159.497	177.056
188.276	138.805	168.443
197.42	131.059	112.16
CUP1 CUT
WT	mrc1Δ	pol32Δ
0.198626	0.259218	0.179122
0.272584	0.298332	0.260611
0.367552	0.420178	0.419412

## Sheet: S4
HA ORF
Glucose		Galactose
-	+	-	+	5mM Nicotinamide
1.98001e-05	0.000312	25.1465	24.5863
0.001262	0.008232	23.5263	26.3311
0.00423	7.88e-05	22.3742	27.412
8.23653e-05	0.004742	24.8695	27.6345
CUP1 CUT
Glucose		Galactose
-	+	-	+	5mM Nicotinamide
0.289597	0.479108	63.712	72.9983
0.285422	0.512962	75.1891	90.5675
0.357319	0.552956	76.1287	86.6197
0.399535	0.759766	66.8038	58.3972

## Sheet: S6D
SFA1 ORF
-	+	≈1mM Formaldehyde
10.5955	46.0962
13.0385	48.4772
17.0345	56.8899
13.0826	47.2398
SFA1 Upstream Antisense
-	+	≈1mM Formaldehyde
0.002659	0.013223
0.00299	0.016175
0.002436	0.013815
0.004629	0.016727
